# Supplementary material for: Uncovering a Macrophage Transcriptional Program by Integrating Evidence from Motif Scanning and Expression Dynamics
Source: PLoS Comput Biol. 2008 Mar 21;4(3):e1000021. doi: 10.1371/journal.pcbi.1000021 (PMC2265556; doi:10.1371/journal.pcbi.1000021)
Supplement: Table S4 — Target genes with microarray expression data. This spreadsheet contains the replicate-combined probeset intensities for all 1,960 differentially expressed genes (see Materials and Methods, Probeset Selection) across all 95 microarray experiments (see Table S3). Column 1 indicates the NCBI gene symbol of the gene. Column 2 indicates the NCBI Entrez Gene ID. Column 3 indicates the probeset selected as representative for the gene. Column 4 provides a brief gene description, obtained from the Affymetrix Mouse GeneChip annotations file. Column 5 indicates the co-expressed gene cluster to which the gene was assigned (see Materials and Methods, Expression Clustering). Columns 6–8 provide listings of the gene's Gene Ontology annotations in the process, component, and function GO hierarchies, respectively (see Materials and Methods, Functional Enrichment Analysis). Column 9 indicates the maximum log2 intensity observed, across all experiments. Columns 10-104 provide the log2 intensity measurements of the probesets across all 95 microarray experiments. (4.30 MB XLS) [file pcbi.1000021.s022.xls]

## Sheet: Sheet1
Gene symbol	Entrez ID	Representative probeset	Gene title	Cluster	GO Process	GO Component	GO Function	ATF3_CPG_0060	ATF3_CPG_0120	ATF3_CPG_0240	ATF3_LPS_0020	ATF3_LPS_0060	ATF3_LPS_0120	ATF3_LPS_0240	ATF3_LPS_0360	ATF3_LPS_0480	ATF3_PAM2_0060	ATF3_PAM2_0120	ATF3_PAM2_0240	ATF3_PIC_0060	ATF3_PIC_0120	ATF3_PIC_0240	ATF3_UNSTIM_0000	CREM_LPS_0060	CREM_LPS_0120	CREM_LPS_0240	CREM_LPS_0360	CREM_LPS_0480	CREM_PIC_0120	CREM_PIC_0240	CREM_PIC_0360	CREM_PIC_0480	CREM_UNSTIM_0000	MYD88_LPS_0020	MYD88_LPS_0060	MYD88_LPS_0120	MYD88_PAM3_0020	MYD88_PAM3_0060	MYD88_PAM3_0120	MYD88_PIC_0020	MYD88_PIC_0060	MYD88_PIC_0120	MYD88_UNSTIM_0000	TRIF_LPSPAM2_0060	TRIF_LPSPAM2_0120	TRIF_LPS_0060	TRIF_LPS_0120	TRIF_UNSTIM_0000	WT_CPG_0020
0610037M15Rik	68395	1431008_at	RIKEN cDNA 0610037M15 gene	6				9.31599	9.31639	9.38213	8.39545	8.90821	9.47019	9.55401	9.70517	9.63894	8.68016	8.96838	9.43178	7.86376	8.40865	9.1248	8.0891	7.35166	8.61059	9.91719	10.0143	10.0874	9.33733	10.1147	10.3713	10.6136	6.73977	6.74654	7.03414	7.65568	6.84471	6.96289	6.86873	6.65622	6.38556	6.66552	6.36168	5.46817	5.21751	5.77674	5.89762	5.31794	5.81695
0710001B24Rik	67446	1429613_at	RIKEN cDNA 0710001B24 gene	8	GO:0006470 (protein amino acid dephosphorylation)		GO:0004721 (phosphoprotein phosphatase activity),GO:0008138 (protein tyrosine/serine/threonine phosphatase activity)	5.82197	5.86013	5.93371	6.05519	5.95119	6.10009	7.07849	8.11645	8.05604	5.94857	5.87001	5.71318	6.01788	6.35118	7.04346	5.88214	5.73907	6.05484	7.27327	7.68375	7.93514	6.18283	7.31896	7.82258	8.15776	5.92736	6.05355	6.23455	6.14715	6.10378	6.33307	6.12169	6.15283	6.43242	6.01446	5.92679	6.46355	6.07291	6.19627	6.12958	6.19193	6.25381
0910001L09Rik	66096	1434214_at	RIKEN cDNA 0910001L09 gene	19				9.05526	8.8672	8.85329	9.51421	9.19492	8.84862	8.3378	8.50991	8.28513	9.0344	9.06635	8.84322	9.33156	9.2286	8.93301	9.26713	9.55127	9.41226	9.08305	8.86291	8.7351	9.47537	9.26761	8.99188	8.83303	9.64615	9.65552	9.61496	9.50257	9.61509	9.79937	9.58433	9.37443	9.41793	8.91456	9.63368	9.77173	9.16517	9.29234	9.29093	9.49033	9.69018
1-Mar	72925	1440209_at	membrane-associated ring finger (C3HC4) 1	9		GO:0016021 (integral to membrane)	GO:0005515 (protein binding),GO:0008270 (zinc ion binding),GO:0046872 (metal ion binding)	6.11596	5.50945	7.30393	6.26383	5.74031	5.28747	7.75326	9.97476	10.3768	5.41685	5.38091	6.06436	5.43006	4.82482	7.12542	6.15249	5.78318	5.33339	8.58736	9.63786	9.88181	6.2777	7.85464	8.06381	8.42871	5.84011	6.57046	6.61581	6.02821	6.57369	6.83218	6.8891	6.92528	6.55118	5.68432	6.90696	5.32809	5.34053	5.96603	4.89756	5.87849	6.80209
1100001G20Rik	66107	1434484_at	RIKEN cDNA 1100001G20 gene	12				4.09924	4.0483	4.76464	4.1021	3.97298	3.89255	4.55839	5.77201	5.86957	4.35992	3.9565	4.46844	4.20452	3.93034	4.39452	4.283	5.08356	5.32726	6.36604	6.61344	6.0724	5.20431	5.2138	5.5428	5.49047	4.77229	4.32578	4.36703	4.3126	4.50312	4.54042	4.14831	4.35249	4.34567	4.01226	4.35662	4.16367	4.42682	4.47735	4.63858	4.32871	4.16112
1110001A07Rik	66140	1423440_at	RIKEN cDNA 1110001A07 gene	3	GO:0007049 (cell cycle),GO:0007067 (mitosis),GO:0051301 (cell division)			7.85003	7.27421	7.16897	7.80597	7.91758	6.98379	6.65197	6.38907	5.98285	7.39055	7.35823	6.89327	7.61549	7.38601	6.82571	8.25231	6.85209	6.74016	6.2762	6.54993	6.09356	7.23675	6.89381	6.98901	6.77165	7.25744	8.78712	8.50487	8.08672	8.58853	8.7072	8.4515	8.70157	8.64863	7.72648	8.68579	8.24668	8.346	8.27841	8.05995	8.72909	8.34563
1110002B05Rik	104725	1448388_a_at	RIKEN cDNA 1110002B05 gene	16		GO:0016020 (membrane),GO:0016021 (integral to membrane)		11.737	11.5579	11.1445	11.6436	11.6639	11.3963	10.5827	9.53439	9.22226	11.5556	11.5118	11.1878	11.7729	11.5675	11.198	11.9097	10.8724	10.8761	10.2484	9.98763	9.55567	11.1763	10.8549	10.4972	10.084	11.162	11.3366	11.4441	11.1061	11.3764	11.1516	11.4869	11.4878	11.3702	11.0221	11.4916	11.3923	11.1593	11.3926	11.1866	11.1188	11.8314
1110004B13Rik	66910	1429058_at	RIKEN cDNA 1110004B13 gene	5		GO:0016020 (membrane),GO:0016021 (integral to membrane)		6.64421	6.27691	5.84454	6.78036	6.42491	6.55907	5.72494	4.89839	4.83041	6.20794	6.3613	6.21355	6.41061	6.15233	5.75633	6.82377	7.12224	7.03535	6.04482	5.75543	4.58591	6.72339	6.48094	5.83049	5.47091	7.27423	7.30444	7.40311	7.05753	7.48911	7.47654	7.56137	7.08241	6.8796	6.7518	7.05506	6.77382	6.576	7.07449	6.62666	6.81825	6.94194
1110014K08Rik /// EG664786 /// LOC664849 /// LOC672175	664786,664849	1436747_at	RIKEN cDNA 1110014K08 gene /// predicted gene, EG664786 /// 1110014K08Rik pseudogene /// hypothetical protein LOC672175	14				10.1176	9.78873	9.2106	10.7703	10.2973	9.93962	9.2034	10.2279	10.4554	10.36	9.94878	9.3103	10.2938	10.0006	9.33869	10.3746	9.55245	9.4849	8.91791	9.26891	9.76116	10.0375	9.27051	9.38157	9.7885	9.7202	10.3625	10.4528	10.2505	10.3547	10.3651	10.3892	10.2125	10.2177	9.82469	10.4704	10.379	9.84374	10.1708	9.82593	10.0576	10.6728
1110018J18Rik	66129	1434441_at	RIKEN cDNA 1110018J18 gene	5				8.39842	8.02973	7.37774	8.18448	8.05462	7.7022	6.47487	5.3225	5.09501	8.04537	8.02459	7.54804	8.35107	8.07882	7.20968	8.43304	7.67331	7.63118	6.71662	5.61406	5.20386	7.96554	7.38554	6.20741	5.77679	7.95034	8.22612	8.16524	7.72354	7.94564	8.07225	8.0465	8.14392	7.96117	7.59303	8.34941	7.55829	8.00734	8.447	8.11771	7.969	8.62367
1110019N10Rik	68523	1428874_at	RIKEN cDNA 1110019N10 gene	9				8.99349	9.39719	9.75209	9.16429	8.81643	8.99503	9.33095	9.8675	9.94536	9.34393	9.70099	9.72757	8.9511	8.96162	9.24109	8.72911	9.34458	9.51415	9.66161	9.83285	10.1013	9.4693	9.52165	9.94923	10.2097	9.47412	8.82493	8.92797	8.84357	8.96128	8.84304	8.88912	8.63777	8.58522	8.46148	8.87026	8.89402	8.84636	9.08442	9.17054	8.66641	8.5635
1110032A13Rik	68731	1428520_at	RIKEN cDNA 1110032A13 gene	2	GO:0006364 (rRNA processing)	GO:0005739 (mitochondrion)		9.01618	8.78211	8.18915	9.16293	9.02183	8.7652	7.67261	7.69571	7.70193	9.13252	8.88634	8.49814	9.07332	8.82022	8.16021	9.15493	9.40805	9.22528	8.45964	7.80643	7.67911	9.22288	8.70644	8.08164	8.21082	9.48398	9.23105	9.2108	9.04525	9.22752	9.30745	9.3036	9.08421	9.05132	8.68868	9.23832	8.82576	8.76252	8.48198	8.2165	8.39041	9.23482
1110032E23Rik	68659	1416805_at	RIKEN cDNA 1110032E23 gene	16		GO:0016021 (integral to membrane)		9.60821	9.01055	8.25235	9.29523	9.1307	8.62775	7.2007	6.03448	5.64362	9.37236	8.98802	8.3933	9.79183	9.52337	8.81188	9.47512	8.69983	8.65674	8.18626	7.08217	6.55651	9.34382	8.75843	7.91799	8.02329	8.92528	8.96568	9.17324	8.42937	8.29708	8.70619	8.47414	8.76232	8.76393	8.26318	9.15832	9.36576	9.09266	9.59265	8.90815	9.58296	9.67419
1110032O16Rik	68742	1424497_at	RIKEN cDNA 1110032O16 gene	6				8.49824	8.32095	8.34406	8.43216	8.34037	8.36395	9.09992	9.99465	10.012	8.33575	8.31752	8.41213	8.39676	8.36104	8.98009	8.24962	9.15423	9.15297	9.79035	9.97059	10.1541	9.31521	9.91998	10.1627	10.124	9.24095	8.76389	8.84324	8.52135	8.75975	8.61954	8.81513	8.72738	8.47105	8.24925	8.7151	8.20461	8.00569	8.47753	8.0629	8.2329	8.50478
1110038D17Rik	68778	1428071_at	RIKEN cDNA 1110038D17 gene	22				7.26135	7.03115	7.09815	7.10751	6.76047	6.66115	6.23881	6.83058	7.10218	7.13633	7.27287	7.22474	6.70574	6.71451	6.68982	6.89665	6.87517	7.49392	6.72724	6.84977	7.13421	7.26702	6.94916	6.96731	7.28906	7.02371	6.77295	6.76518	6.5668	6.9162	6.8726	6.82729	6.58394	6.37065	6.02936	6.70478	6.61767	7.09138	7.02031	7.07796	6.62716	6.93843
1110049F12Rik	66193	1428675_at	RIKEN cDNA 1110049F12 gene	19				7.51207	7.39854	7.29676	7.81765	7.42619	6.86364	6.46185	6.42715	6.59925	7.28864	7.65933	7.48825	7.54524	7.31268	6.8575	7.75841	7.37326	7.07187	6.62432	6.60469	6.50733	7.21597	7.17723	6.81953	6.62569	7.8235	7.92918	7.8286	7.46345	7.92702	7.89043	7.90939	7.70306	7.69345	7.21606	7.75826	7.52594	7.56896	7.66479	7.25681	7.79412	7.72094
1110061O04Rik	97287	1425066_a_at	RIKEN cDNA 1110061O04 gene	24	GO:0006470 (protein amino acid dephosphorylation),GO:0016311 (dephosphorylation)	GO:0001726 (ruffle),GO:0048471 (perinuclear region of cytoplasm)	GO:0004438 (phosphatidylinositol-3-phosphatase activity),GO:0004721 (phosphoprotein phosphatase activity),GO:0016791 (phosphoric monoester hydrolase activity)	9.27528	9.70946	10.1357	7.85898	8.75816	9.7461	10.4835	10.3107	10.0916	8.87908	9.64894	10.1937	8.56303	9.3566	10.5291	7.92317	8.33376	9.28712	10.2709	10.1358	9.86585	9.00263	10.2963	10.2045	9.98556	8.07351	7.9277	8.31152	8.84724	7.86243	7.91975	8.08541	7.86897	7.96847	8.66666	8.15334	7.836	8.51195	8.30823	9.04598	7.6911	8.18725
1110064P04Rik	268390	1435160_at	RIKEN cDNA 1110064P04 gene	12	GO:0006457 (protein folding),GO:0006986 (response to unfolded protein)			7.44907	7.45733	7.56137	7.39098	7.02835	7.20198	7.04197	7.29715	7.23334	7.1451	7.40962	7.53555	7.29553	7.38544	7.36683	7.1141	7.63989	7.56701	7.30736	7.28125	7.48522	7.39031	7.22852	7.35766	7.48722	7.56522	7.27611	7.27226	7.30026	7.3813	7.52452	7.4935	7.10096	7.04322	7.00491	7.28693	6.90969	7.28734	7.37332	7.07662	7.11061	7.16827
1190002N15Rik	68861	1433582_at	RIKEN cDNA 1190002N15 gene	5				8.81541	8.50639	7.73512	9.19093	8.82244	8.57527	7.03739	6.18697	5.93744	8.67328	8.62244	7.79347	8.87945	8.66187	7.61291	9.02543	8.85331	8.83851	7.11971	6.27847	6.19886	8.90391	7.98794	7.50617	7.37058	8.70151	8.96084	8.96472	8.76615	9.13188	9.24052	9.03394	9.03675	8.97424	8.68991	8.75678	8.8999	8.96482	8.91175	8.49841	9.12849	8.59906
1190003J15Rik	76974	1455186_a_at	RIKEN cDNA 1190003J15 gene	11	GO:0006810 (transport)	GO:0005739 (mitochondrion)	GO:0005496 (steroid binding),GO:0016787 (hydrolase activity)	5.32722	5.95954	5.96078	5.43309	5.35179	5.7162	6.58659	6.49959	7.42121	5.39969	6.0758	6.74246	5.37692	5.33792	5.34262	5.44768	5.45139	5.6367	6.45294	7.18375	6.75345	5.19255	5.38166	5.44388	5.41696	5.32607	5.28811	5.3109	5.41667	5.57035	5.1776	5.23612	5.30741	5.04674	5.16247	5.40772	5.7217	5.38646	5.23548	5.2999	5.36743	5.30862
1200002N14Rik	71712	1424524_at	RIKEN cDNA 1200002N14 gene	17			GO:0003676 (nucleic acid binding)	8.05251	8.89663	10.3023	7.38151	7.25868	8.03481	10.6668	10.9018	10.7207	7.7425	8.6726	9.85269	7.83924	8.38492	10.8236	7.25775	7.67937	8.39252	10.5676	10.8244	10.4825	8.44322	10.5469	10.62	10.2685	7.80254	7.86598	7.94411	7.9759	7.76873	7.92469	7.81175	7.8312	7.76231	7.601	8.04403	7.5273	8.31121	8.25076	8.61182	7.9385	8.14777
1200006F02Rik	71706	1451486_at	RIKEN cDNA 1200006F02 gene	16		GO:0005615 (extracellular space),GO:0016021 (integral to membrane)		7.19795	6.94414	5.94768	7.1729	7.01378	6.66282	5.58687	4.7011	5.14839	6.99606	6.89231	5.99297	7.30692	7.04896	5.81023	7.19141	6.39652	6.26909	5.58932	5.04425	5.01312	6.60084	6.3464	6.39712	6.63187	6.51303	6.91456	6.94214	6.63698	6.92351	6.98149	6.91498	6.97607	6.8987	6.83036	7.19443	7.26347	7.17389	7.81941	7.44663	7.13332	7.81561
1200009I06Rik	74190	1428420_a_at	RIKEN cDNA 1200009I06 gene	15				7.46739	8.11464	8.85171	4.42541	6.42938	8.242	9.02906	8.81527	8.19087	6.16249	7.84463	8.26555	5.67499	7.41167	8.05109	4.67389	5.94676	8.18987	9.31971	8.65458	8.06929	6.87034	7.4206	6.5068	5.80133	4.63479	4.80075	5.49288	6.9249	4.27503	4.42608	4.43995	4.37702	4.5456	5.91163	4.81737	6.02451	6.70858	6.1509	7.58173	5.25352	5.01978
1200011O22Rik	71735	1428144_at	RIKEN cDNA 1200011O22 gene	10			GO:0005515 (protein binding)	7.4699	7.37614	7.23902	7.70755	7.60133	7.587	6.77597	6.81961	6.84349	7.42463	7.6377	7.53642	7.60429	7.44926	6.9778	7.53572	7.70542	7.71739	6.95057	6.76367	6.51542	7.69026	7.41383	6.7907	6.73868	7.66164	7.96805	8.08283	7.903	7.93498	8.15286	8.08968	7.78202	7.88326	7.59048	8.01375	7.331	7.26476	7.47923	7.51295	7.13655	7.80674
1200016E24Rik	319202	1452418_at	RIKEN cDNA 1200016E24 gene	25				9.01231	9.15649	9.14736	7.49006	9.28657	9.69457	10.4714	9.7142	9.38337	8.75052	8.46638	8.68996	8.01267	8.12355	9.51443	6.85914	9.11836	9.83915	10.09	9.52517	9.04396	8.42238	9.75381	9.95717	9.0768	6.58993	6.55584	7.34401	8.70407	6.27811	6.70445	6.71954	6.71965	6.82005	7.97452	6.69071	7.97217	8.16773	8.42391	8.94018	6.97213	6.56226
1300001I01Rik	74148	1428106_at	RIKEN cDNA 1300001I01 gene	4	GO:0008152 (metabolic process)		GO:0003743 (translation initiation factor activity),GO:0005488 (binding),GO:0016491 (oxidoreductase activity)	7.56303	7.46079	7.34322	7.84099	7.37045	7.27876	6.58694	6.32638	6.44179	7.64071	7.70648	7.54218	7.51396	7.28262	7.13866	7.58236	8.09744	7.7666	6.88485	6.68738	6.29357	7.4247	6.93071	6.13034	6.13135	8.13144	7.53648	7.73073	7.45538	7.51086	7.45314	7.54822	7.44751	7.23966	7.0474	7.52329	7.77213	7.58756	7.59856	7.39859	7.44205	7.24728
1300002K09Rik	74152	1453234_at	RIKEN cDNA 1300002K09 gene	22				4.21928	3.88501	3.95576	3.60372	3.82734	3.75981	3.63313	3.60962	4.17078	3.78692	3.6755	4.04132	3.73332	4.01118	3.76753	3.51226	3.9326	3.74977	3.68624	4.14469	4.30312	4.34797	3.84881	4.5012	4.6032	4.01434	3.73473	3.6382	3.73357	3.76944	3.49275	3.60925	3.65049	3.43753	3.57793	3.56942	4.2158	4.68503	4.94571	4.82035	4.65958	3.92874
1300018I05Rik	74157	1451082_at	RIKEN cDNA 1300018I05 gene	6	GO:0006512 (ubiquitin cycle)	GO:0005622 (intracellular),GO:0005634 (nucleus)	GO:0003676 (nucleic acid binding),GO:0005515 (protein binding),GO:0008270 (zinc ion binding),GO:0016874 (ligase activity),GO:0046872 (metal ion binding)	8.09294	8.24913	8.79971	8.61579	8.19352	8.53667	9.70533	10.0496	9.78847	8.00012	8.46945	8.58886	8.04956	8.20789	9.07795	8.31305	8.67559	8.89448	9.64519	10.0297	9.98295	8.45637	9.59532	9.69066	9.88338	8.77787	8.32417	8.37353	8.30019	8.46408	8.35553	8.21748	8.07541	8.13993	8.07645	8.29011	7.92607	8.1126	7.74033	7.99812	7.85908	8.11882
1500010J02Rik	68964	1423655_a_at	RIKEN cDNA 1500010J02 gene	3				6.84377	6.5295	6.15799	7.13956	6.75055	6.58263	6.05485	5.9717	6.01739	6.6703	6.72868	6.53571	6.6334	6.51003	6.12603	6.76907	7.13533	7.0895	6.64465	6.12656	5.90728	7.06261	6.60835	6.16529	5.81926	7.27145	7.29796	7.38288	7.14062	7.54073	7.57268	7.52041	7.21974	7.20735	7.37025	7.33285	7.2975	7.16468	7.27106	7.29825	7.24268	7.13204
1600014C10Rik	72244	1424444_a_at	RIKEN cDNA 1600014C10 gene	6	GO:0006412 (translation)	GO:0005622 (intracellular),GO:0005840 (ribosome),GO:0016021 (integral to membrane)	GO:0003735 (structural constituent of ribosome)	7.49532	7.23095	6.81473	7.66568	7.42807	7.43322	9.36014	10.1106	10.1881	7.35472	7.43159	7.04961	7.31578	7.35412	9.26145	7.64385	7.14729	7.08636	9.29585	10.0751	10.4094	7.34935	9.81889	10.383	10.7097	7.15186	7.6266	7.55735	7.38493	7.81171	7.52449	7.54258	7.56641	7.58116	7.28156	7.59991	7.7647	7.43043	7.51319	7.34185	7.48563	7.58347
1700025G04Rik	69399	1455732_at	RIKEN cDNA 1700025G04 gene	16				7.14898	7.0774	6.65893	7.56093	7.21977	7.22143	6.32886	5.64157	5.43524	7.33792	7.20089	6.74328	7.2667	7.21354	6.67146	7.22652	7.42636	7.46252	6.60161	5.9098	5.6493	7.44215	6.81987	6.07615	6.17325	7.50329	7.62814	7.754	7.63505	7.71919	7.94381	7.89072	7.80614	7.73226	7.43541	7.71693	7.40419	7.58548	7.78939	7.46567	7.91204	7.6628
1700040I03Rik	73327	1429122_a_at	RIKEN cDNA 1700040I03 gene	19	GO:0006508 (proteolysis)	GO:0005576 (extracellular region),GO:0005615 (extracellular space)	GO:0008233 (peptidase activity)	6.09293	5.63842	5.73592	6.4806	6.16446	5.40376	4.73763	4.8074	4.42995	5.58895	5.78291	5.35315	6.03065	5.64144	4.90053	6.25645	6.70997	6.14658	4.78064	4.87561	4.76787	6.11482	5.804	4.92997	4.3774	6.85672	6.87755	6.89684	6.4302	6.63377	6.57501	6.85697	6.65955	6.23066	6.18505	6.82444	5.84387	5.86627	6.2803	5.71789	6.25544	6.41213
1700054N08Rik	73420	1424796_at	RIKEN cDNA 1700054N08 gene	19				5.96192	5.01745	5.0664	6.46008	5.9959	5.13042	5.16406	4.89835	4.72356	5.66799	5.20951	5.13507	6.19434	5.4878	4.92494	6.33067	6.07051	4.98299	4.9242	4.9561	4.81923	5.80218	4.50514	4.65777	5.29161	6.28948	7.08005	7.07634	6.71598	6.94428	7.04994	7.09744	6.87213	7.00505	6.20592	6.95279	7.02018	6.63567	6.70548	6.11999	7.17196	6.84548
1810015C04Rik	66270	1424683_at	RIKEN cDNA 1810015C04 gene	5		GO:0016021 (integral to membrane)		10.5147	10.324	9.71092	10.762	10.5845	10.4973	9.51201	8.37742	8.10307	10.1449	10.1175	9.8308	10.2291	10.2358	9.69592	10.6495	9.95384	10.0007	9.35194	8.59086	7.73721	10.3236	9.60793	8.8079	7.77466	9.85327	10.3004	10.3039	10.1925	10.3628	10.4657	10.3362	10.4506	10.4242	10.1461	10.2616	9.83116	9.78655	10.1575	9.85742	10.0147	10.0809
1810029B16Rik	66282	1441400_at	RIKEN cDNA 1810029B16 gene	15				5.37861	8.00393	8.95698	4.56634	4.52594	7.08551	8.87706	8.64078	8.56043	5.34829	7.07912	8.61114	4.63026	7.05249	7.31243	4.53435	5.13252	7.56557	8.71961	8.31972	8.20443	6.12373	7.01494	6.74873	6.28215	4.92806	4.56406	4.56492	4.84555	4.65964	4.72635	4.61903	4.2978	4.24934	4.41195	4.54545	5.31171	5.38127	4.97036	5.97717	4.69093	4.43975
1810034K20Rik	67881	1428337_at	RIKEN cDNA 1810034K20 gene	19			GO:0000287 (magnesium ion binding),GO:0004721 (phosphoprotein phosphatase activity),GO:0004725 (protein tyrosine phosphatase activity),GO:0016787 (hydrolase activity),GO:0046872 (metal ion binding)	7.37811	6.68387	6.82775	7.66508	7.15844	6.65076	6.06457	6.36884	6.38781	7.08657	7.27233	6.71038	7.18365	7.08689	6.63852	7.71103	7.25988	6.9752	6.78039	6.50873	6.58448	7.32026	6.73815	6.74605	7.1637	7.69239	7.86411	7.40525	6.80753	7.63591	7.7383	7.66387	7.53499	7.57621	6.85884	7.633	7.15754	6.93681	7.30983	6.98293	7.11662	7.68965
1810047C23Rik	192169	1418319_at	RIKEN cDNA 1810047C23 gene	32				9.11228	9.15403	9.0755	9.3739	9.02533	8.77079	8.35473	8.71091	8.63521	8.95284	9.09284	8.98409	9.35116	9.15475	8.71344	9.0832	9.60383	9.40505	8.74168	8.5051	8.35523	9.26412	9.05833	8.74493	8.67986	9.59777	9.24741	9.3178	9.23021	9.15615	9.33607	9.26701	9.31079	9.34652	8.96154	9.32761	8.82854	8.79473	9.15809	8.8523	8.79157	9.25525
1810074P20Rik	67490	1429008_at	RIKEN cDNA 1810074P20 gene	23				7.50613	7.42701	7.21206	7.34823	7.20541	7.08823	6.51581	6.26271	6.58673	7.24134	7.26728	6.75897	7.52464	7.11795	6.60047	7.43101	6.89838	6.80672	5.98163	6.31559	6.40798	7.05922	6.72894	6.30814	5.9113	7.13222	6.64739	6.74306	6.16887	6.44263	6.76766	7.09691	6.7539	6.59594	6.11038	6.82253	6.05495	5.93587	6.7237	6.0745	5.53584	6.95254
2010002M12Rik	112419	1438311_at	RIKEN cDNA 2010002M12 gene	8			GO:0005488 (binding)	2.57994	2.6767	2.63634	2.7614	2.7162	3.14198	4.40242	4.22913	4.23188	2.59372	2.52612	2.61596	2.72823	3.30138	4.07812	2.79279	2.74162	2.97951	4.24613	4.19711	4.78454	3.07272	5.17815	4.16265	5.06136	2.7108	2.73885	2.8564	2.78032	2.67379	2.45695	2.70943	2.696	2.67074	2.70683	2.66153	2.75227	2.70146	2.59334	2.76931	2.95254	2.78883
2010003O18Rik	384281	1425211_at	RIKEN cDNA 2010003O18 gene	10	GO:0006376 (mRNA splice site selection),GO:0006450 (regulation of translational fidelity)	GO:0005681 (spliceosome)	GO:0003723 (RNA binding),GO:0016740 (transferase activity),GO:0017068 (glutamyl-tRNA(Gln) amidotransferase activity)	6.63576	6.3182	5.89998	6.78314	6.61157	6.20289	5.59686	5.95986	5.92888	6.49534	6.53657	6.08165	6.85932	6.65525	6.04984	6.77081	7.04788	6.66083	6.04543	6.02518	5.84111	6.7276	6.17659	6.21618	6.10109	7.26023	6.94357	6.94174	6.66607	6.84496	6.9363	6.9223	6.98496	6.89399	6.39299	6.91811	6.44037	6.33557	6.67492	6.30495	6.7652	6.83476
2010106G01Rik	66552	1425193_at	RIKEN cDNA 2010106G01 gene	9	GO:0006508 (proteolysis)	GO:0016020 (membrane),GO:0016021 (integral to membrane)	GO:0004872 (receptor activity),GO:0008233 (peptidase activity),GO:0008717 (D-alanyl-D-alanine endopeptidase activity),GO:0016787 (hydrolase activity)	8.69862	8.68155	9.08603	7.97544	8.5778	9.10843	9.81849	9.70827	9.67653	7.90039	8.56062	8.59402	8.5335	8.67942	9.61071	8.79831	8.5349	8.69113	9.19986	9.70688	9.80787	8.67323	9.3168	9.48684	9.51603	8.61628	8.96587	8.73834	8.65118	8.96229	8.91218	9.10769	8.86043	8.57298	8.47899	9.02132	7.97977	8.41095	8.23494	8.25596	8.22764	8.85595
2010107H07Rik	66487	1456204_at	RIKEN cDNA 2010107H07 gene	5	GO:0006412 (translation)	GO:0005622 (intracellular),GO:0005840 (ribosome)	GO:0003735 (structural constituent of ribosome)	9.45961	9.01609	8.83615	9.35563	9.29191	9.083	8.49048	8.27273	7.93487	9.40123	9.26463	9.08531	9.1156	8.95729	8.49412	9.42742	8.76347	8.71985	8.45446	8.2052	7.94729	8.75901	8.68637	8.70443	8.19058	8.93722	8.86404	8.95602	8.70601	8.62836	8.7504	8.7673	8.67983	8.6648	8.19251	8.93974	8.30842	7.94569	8.5469	8.2139	8.17511	9.00024
2010109K09Rik	70267	1442945_at	RIKEN cDNA 2010109K09 gene	15				7.11403	8.01252	8.66277	4.40943	6.14911	7.5382	8.97029	8.88439	8.05272	8.57174	7.2765	8.31895	6.13917	8.85721	8.98314	4.28012	6.05625	7.91285	8.04781	8.07446	7.43905	7.59964	8.52373	6.77135	6.58556	5.52496	4.67107	3.80534	5.46596	3.68179	3.77847	4.00742	4.28542	4.32445	4.06916	4.01983	6.87129	6.61583	6.89883	7.7718	5.21341	4.39767
2210009G21Rik	74243	1431831_at	RIKEN cDNA 2210009G21 gene	11				5.72579	6.32658	6.3451	5.85346	5.7574	5.71394	6.31191	7.41253	7.52912	6.18673	6.45453	6.03939	6.03249	6.22499	6.24871	6.02403	5.80934	5.679	5.64898	6.23525	6.47011	5.40645	5.76319	5.51988	5.58694	6.04049	6.11763	5.5723	5.71478	6.10072	6.21496	6.21033	6.01476	6.01411	5.62826	6.0197	6.28059	6.58202	6.11511	6.25481	6.62228	6.02673
2210010A19Rik	94184	1436372_a_at	RIKEN cDNA 2210010A19 gene	10	GO:0019752 (carboxylic acid metabolic process)		GO:0016740 (transferase activity),GO:0016829 (lyase activity),GO:0016831 (carboxy-lyase activity)	6.70734	6.97857	6.80188	7.38936	7.22111	7.0427	6.60721	6.89287	7.00027	6.73078	7.37813	6.5055	7.24955	6.98624	6.59703	7.27614	7.18448	7.18769	6.49051	6.60405	6.87479	6.94409	6.85747	6.24472	5.94219	7.39864	7.60393	7.25228	7.26154	7.49596	7.87026	7.65929	7.37191	7.44171	7.00384	7.46966	7.10165	7.19288	6.91596	7.1437	7.17653	7.45024
2210010L05Rik	98682	1424463_at	RIKEN cDNA 2210010L05 gene	18			GO:0004872 (receptor activity)	9.89103	9.65112	9.09736	10.1012	9.68354	9.54317	8.43826	7.19638	6.61462	9.52595	9.67186	9.44142	9.87834	9.74624	8.97084	9.82632	8.78005	8.5739	8.03193	6.76467	5.54113	8.89139	8.20505	7.39747	6.85973	8.64328	9.43169	9.41605	9.34793	9.21186	9.48028	9.21296	9.40654	9.34214	9.09561	9.56274	9.5204	9.19121	9.63819	9.4893	9.30071	9.16147
2210406H18Rik	70133	1430878_at	RIKEN cDNA 2210406H18 gene	15				7.07536	7.16965	7.8456	5.67937	6.5074	7.14224	7.22096	7.80837	7.39552	6.05905	7.01493	7.64854	6.10209	6.44622	6.8586	5.34397	6.70969	7.35452	7.16	7.48442	7.63323	6.6933	7.3921	7.17072	6.93884	6.10897	5.36125	5.84758	6.54969	5.48997	5.17625	5.1223	5.6839	5.55439	6.3927	5.75031	5.38923	6.24914	6.47403	7.0781	5.40834	6.2283
2210419I08Rik	73663	1429637_at	RIKEN cDNA 2210419I08 gene	16				7.72012	6.59492	6.15415	6.97087	6.95606	6.41368	5.12708	3.64093	3.52513	6.73837	6.89558	6.28469	7.78238	6.58493	5.25529	7.47547	6.26894	6.03033	5.2693	4.31101	3.79014	6.70863	5.9651	5.07348	4.82845	6.61135	6.63584	6.57605	5.75681	6.15399	6.28788	6.06031	6.48884	6.13552	5.64386	6.75579	7.42056	7.51164	7.51573	6.77809	7.98724	7.16218
2310001H17Rik	76432	1446342_at	RIKEN cDNA 2310001H17 gene	8				4.47889	3.89458	4.60156	4.84127	4.19175	3.91403	4.47711	5.24464	5.63422	4.25605	4.61798	4.02485	4.37991	4.07879	5.01626	4.51713	4.20942	4.17056	4.698	4.87233	5.42069	4.32236	5.16116	5.62377	6.02134	4.62081	4.27031	4.2798	4.04712	4.19513	4.51949	4.26274	4.29304	4.14511	3.91428	4.24349	3.91531	4.16388	4.43963	4.17317	4.05592	4.13858
2310007F21Rik	66939	1424016_at	RIKEN cDNA 2310007F21 gene	14	GO:0006810 (transport),GO:0015031 (protein transport)	GO:0005737 (cytoplasm)		7.25531	7.24973	6.82185	7.70925	7.2527	6.69834	5.73412	6.48396	6.85094	7.49519	7.3392	6.86178	7.60774	7.27375	6.31851	7.67957	7.25413	6.94462	6.03284	6.66656	7.01516	7.54734	6.83695	6.84257	7.50609	7.52982	7.61268	7.52091	7.05781	7.47228	7.584	7.62662	7.41244	7.4107	6.94896	7.52523	7.26853	7.19549	7.53227	7.07303	7.25042	7.78606
2310007H09Rik	76429	1452889_at	RIKEN cDNA 2310007H09 gene	7	GO:0008152 (metabolic process)	GO:0005615 (extracellular space)	GO:0000287 (magnesium ion binding),GO:0003824 (catalytic activity),GO:0016787 (hydrolase activity)	6.70956	6.55696	6.55484	6.89827	6.85912	6.70706	6.37427	6.24107	5.82169	6.60895	6.75221	6.68703	6.72344	6.6786	6.66049	6.85131	6.59276	6.68311	6.66136	6.38394	6.43025	6.76411	6.77395	6.56408	6.44679	6.58749	6.86801	6.80611	6.68561	6.62195	6.79786	6.74642	6.69446	6.59073	6.5832	6.79577	7.10075	7.20583	7.03626	6.7771	7.47513	6.60978
2310008H04Rik	224008	1451171_at	RIKEN cDNA 2310008H04 gene	23				6.93693	6.77862	6.93806	7.0416	6.95538	7.02702	6.85164	6.71741	7.00165	6.59732	6.82622	6.72113	6.64561	6.73761	6.7422	7.1342	6.9125	7.01753	6.49646	6.80767	6.8773	6.68874	6.84943	6.38598	5.76819	6.8208	7.5012	7.43104	7.269	7.50328	7.45863	7.48789	7.31248	7.20868	7.02596	7.5014	7.42699	7.80235	7.57226	7.32612	7.61531	7.07922
2310014D11Rik	69633	1428914_at	RIKEN cDNA 2310014D11 gene	16				8.07455	7.66472	6.94041	8.39004	8.0329	7.77396	6.28896	4.75622	4.67783	7.96447	7.63118	6.88938	7.9401	8.06885	7.07785	8.09177	8.02223	7.85705	6.1257	4.49866	4.62417	7.93781	6.60356	4.60868	4.22764	7.89765	8.10566	8.17018	8.02168	8.25503	8.41229	8.4521	8.18378	8.27475	7.94089	8.14319	7.73998	7.73827	7.6909	7.26428	7.77973	7.84155
2310028N02Rik	66950	1417030_at	RIKEN cDNA 2310028N02 gene	14		GO:0016020 (membrane),GO:0016021 (integral to membrane)		8.43645	7.22952	6.21253	8.09397	8.52978	7.42701	5.12302	4.27028	4.78857	7.73044	7.40262	6.40581	8.36027	7.654	5.93379	8.83763	7.60159	6.8922	4.55505	3.90469	4.2803	7.79545	6.01523	5.1975	5.48014	7.8013	8.43826	8.55041	8.01033	8.22741	8.23499	8.22979	8.3517	8.16606	8.12318	8.24148	8.0017	7.74425	7.93196	7.1084	7.70597	8.28261
2310047A01Rik	71918	1428431_at	RIKEN cDNA 2310047A01 gene	14			GO:0003676 (nucleic acid binding),GO:0008270 (zinc ion binding)	7.70656	7.55219	7.11679	8.20844	7.72527	7.58292	6.81124	7.13711	7.43133	7.78015	7.66339	7.31886	7.83024	7.55331	7.02585	7.78738	7.98494	7.4964	6.84443	7.12043	7.55998	7.77616	7.22367	7.46621	7.67648	7.80031	7.83727	7.93004	7.73841	8.00149	7.98775	7.94827	7.86231	7.94705	7.6534	7.92096	7.35619	7.02258	7.56268	7.01404	7.09179	7.92481
2310056P07Rik	70186	1451385_at	RIKEN cDNA 2310056P07 gene	32		GO:0016020 (membrane),GO:0016021 (integral to membrane)		8.69221	8.49732	8.56754	8.81141	8.47727	8.22125	8.05573	8.33899	8.10309	8.53267	8.51233	8.50851	8.56142	8.28455	8.34684	8.50391	9.73801	9.49643	8.97132	8.7486	8.47937	9.09953	9.02101	8.95984	8.64361	9.81384	9.54248	9.39605	9.44759	9.59583	9.59889	9.57534	9.35144	9.13201	8.95397	9.34563	9.55003	9.49398	9.6339	9.2409	9.59838	8.67585
2310073E15Rik	75692	1428534_at	RIKEN cDNA 2310073E15 gene	10			GO:0004872 (receptor activity)	7.38985	6.98706	7.16365	7.62101	7.23111	6.66635	6.34865	6.595	6.58503	7.20513	7.32101	7.33049	7.40757	7.25096	6.58705	7.84771	7.49189	7.11508	6.44882	6.62169	6.56208	7.24461	6.80006	6.4083	6.63772	7.83436	7.78544	7.64877	7.34238	7.75721	7.71093	7.38765	7.51611	7.55051	7.07178	7.63025	7.34266	7.32231	7.18289	7.20335	7.42987	7.59936
2310079F09Rik	70290	1460536_at	RIKEN cDNA 2310079F09 gene	15				7.25208	6.92314	7.17328	6.14472	6.75819	7.30053	7.09315	6.91108	6.59788	7.01664	6.8157	7.14452	6.11195	6.59012	6.26929	5.78402	6.72543	7.28016	6.48289	6.89798	6.63074	7.01938	6.14225	5.96504	6.07609	5.80667	5.84758	6.10018	6.47002	6.13282	5.72337	5.80642	5.82705	5.64759	6.52027	5.72909	5.96551	6.06898	7.50187	7.11793	5.86632	5.79611
2310079N02Rik	66566	1417779_at	RIKEN cDNA 2310079N02 gene	32			GO:0000166 (nucleotide binding),GO:0005524 (ATP binding),GO:0016301 (kinase activity),GO:0016740 (transferase activity),GO:0017111 (nucleoside-triphosphatase activity)	7.55189	7.16021	7.38225	8.06837	7.7069	7.54259	6.8762	7.07542	7.09143	7.68246	7.51558	7.32163	7.52574	7.34216	7.09201	7.86055	8.60504	8.35993	7.69022	7.43338	7.63239	8.19075	8.11249	7.78119	7.54172	8.67445	8.15295	8.13608	7.85066	8.29998	8.12314	8.35108	8.0683	8.04258	7.78339	8.0682	7.93989	7.52226	7.78195	7.63509	7.7974	7.98243
2400001E08Rik	66508	1448718_at	RIKEN cDNA 2400001E08 gene	19				9.08509	8.71612	8.87787	9.0823	8.97424	8.81987	8.22892	8.48987	8.54238	8.9496	8.96666	9.21961	8.90071	8.83723	8.8319	9.20319	9.46459	9.26833	9.03112	8.79943	8.93139	9.57634	9.47395	9.33493	9.49083	9.64717	9.57972	9.54036	9.43058	9.72861	9.81011	9.66576	9.36054	9.27238	9.01268	9.46708	8.9555	9.08732	9.20946	8.94939	9.15828	9.38288
2400003C14Rik	71955	1423837_at	RIKEN cDNA 2400003C14 gene	17		GO:0005793 (ER-Golgi intermediate compartment)	GO:0005515 (protein binding)	8.52606	8.70837	9.01367	8.01671	8.32958	8.81523	9.37582	9.37386	9.41915	8.15947	8.59621	8.945	8.08679	8.28917	8.87123	8.27013	8.05674	8.50076	9.2563	9.38237	9.54516	8.11422	8.66328	8.5783	8.67937	8.07476	8.16573	8.09324	8.30344	8.13495	8.32009	8.0476	8.09844	7.79237	7.82733	8.1238	7.36759	7.82424	8.00507	7.99765	7.40672	8.07378
2400009B08Rik	68234	1439834_at	RIKEN cDNA 2400009B08 gene	12				3.95739	3.97294	4.02762	3.89212	3.92767	3.92427	3.76753	4.62651	4.24015	3.99484	3.92573	3.67014	3.98362	3.88253	4.03032	3.76994	4.22943	4.13577	4.21772	4.41526	4.40937	4.09945	4.11737	4.2092	4.1791	4.20842	3.96942	3.87986	3.84945	3.99133	4.13813	3.95168	3.84364	4.07957	3.91331	4.07285	4.43351	4.26429	3.95477	4.03486	4.23216	3.83696
2410005O16Rik	66302	1457999_at	RIKEN cDNA 2410005O16 gene	19			GO:0005488 (binding)	7.16162	6.94478	6.02067	7.75855	6.90618	6.74663	5.21694	4.89816	4.53307	6.43747	6.55875	5.64317	7.36016	6.96361	5.98926	7.9401	7.63305	7.46384	5.86695	5.02769	4.86501	7.77019	6.35298	5.73529	6.12086	8.00368	7.21247	7.0083	6.34251	7.27475	7.36658	7.32709	7.45059	7.34618	6.69382	7.37027	6.38701	6.18508	7.12071	6.23774	6.94626	7.75478
2410006H16Rik	69221	1447936_at	RIKEN cDNA 2410006H16 gene	14				8.79238	8.28807	8.16279	9.66638	8.75406	7.80999	6.42531	7.27719	7.94363	8.74535	8.53604	8.40459	8.52348	7.89863	6.97107	8.99983	8.19737	7.59646	6.77377	6.65466	7.37324	8.35495	7.52311	7.41933	7.76195	8.37364	8.74547	8.57727	8.24993	8.72455	8.63605	8.64909	8.54846	8.56627	7.79379	8.55064	7.45869	7.31511	7.61135	7.21367	7.36747	8.66704
2410014A08Rik	109154	1436508_at	RIKEN cDNA 2410014A08 gene	2	GO:0006605 (protein targeting)	GO:0009897 (external side of plasma membrane),GO:0009986 (cell surface),GO:0016020 (membrane),GO:0016021 (integral to membrane)		6.87194	6.4003	6.40259	6.9067	7.02767	6.6875	6.0499	5.38055	5.33251	6.36571	7.02032	6.59399	6.83772	6.64927	6.11098	7.20502	6.9626	6.76825	5.5276	5.14539	5.15097	6.13955	6.15959	5.46651	5.06231	7.02862	7.79212	7.39223	7.49591	7.48968	7.74614	7.55866	7.67012	7.61866	7.27455	7.76067	7.63547	7.30355	7.22385	7.06449	7.44404	7.27332
2410016O06Rik	71952	1448413_at	RIKEN cDNA 2410016O06 gene	19	GO:0006338 (chromatin remodeling),GO:0006350 (transcription),GO:0006355 (regulation of transcription, DNA-dependent),GO:0016568 (chromatin modification),GO:0042254 (ribosome biogenesis and assembly)	GO:0005634 (nucleus),GO:0005730 (nucleolus),GO:0030685 (nucleolar preribosome)	GO:0003723 (RNA binding)	7.03889	7.06723	6.93484	7.70594	6.78745	6.31091	6.36337	5.8207	5.94281	6.93968	7.32757	7.0852	7.50202	6.59469	6.95506	7.72246	7.79143	7.44539	6.70274	6.05826	5.71704	7.39256	7.18664	6.82887	6.76113	8.56872	7.77305	7.73878	7.20787	7.91174	7.81045	7.83158	7.55106	7.38276	6.68791	7.63203	7.71687	7.37069	7.24236	7.37413	7.68784	7.58422
2410018C20Rik	67873	1417146_at	RIKEN cDNA 2410018C20 gene	10	GO:0006355 (regulation of transcription, DNA-dependent),GO:0006413 (translational initiation),GO:0044237 (cellular metabolic process),GO:0044249 (cellular biosynthetic process)	GO:0005851 (eukaryotic translation initiation factor 2B complex)	GO:0003700 (transcription factor activity),GO:0003743 (translation initiation factor activity),GO:0005525 (GTP binding)	7.38096	7.15646	6.94581	7.4376	7.53218	7.25978	6.4806	5.96028	5.80357	7.34818	7.58561	7.04019	7.47534	7.29064	6.69965	7.72821	7.57801	7.2715	6.72308	6.00536	5.62324	7.32779	7.06867	6.33876	6.10713	7.93614	7.53874	7.6218	7.23626	7.35092	7.46544	7.53152	7.38784	7.21372	6.85327	7.5667	6.92414	6.49664	6.51068	6.57065	6.44378	7.29769
2410018G20Rik	72083	1452591_a_at	RIKEN cDNA 2410018G20 gene	7				7.84712	7.75827	7.64796	8.14757	7.88273	7.61266	7.28552	7.6403	7.39553	7.70964	7.79215	7.56601	8.0877	7.79134	7.56819	7.94084	7.84256	7.71003	7.80493	7.53332	7.49576	7.76724	7.91023	7.59893	7.39224	7.87926	7.92691	7.88053	7.7093	7.81461	7.79211	7.67164	7.80255	7.72235	7.41277	7.89473	7.96565	7.78926	7.94582	7.74343	7.5222	7.78063
2410127E16Rik	76787	1431046_at	RIKEN cDNA 2410127E16 gene	11			GO:0005515 (protein binding)	4.99665	5.62105	6.80717	4.45403	4.31769	5.38273	5.6669	5.58899	6.162	4.53006	6.16561	7.1292	4.21881	4.87251	4.61215	3.99265	4.42463	5.01547	5.52077	5.1616	5.26415	4.44454	4.36322	4.33643	4.48872	4.44149	4.4773	4.18722	4.51641	4.18867	4.34285	4.27512	4.41328	4.61831	4.57121	4.5034	4.53639	5.36389	4.46074	5.71971	4.56798	4.33404
2410129H14Rik	76789	1455052_a_at	RIKEN cDNA 2410129H14 gene	19				8.13378	7.90428	7.72194	7.95074	7.76421	7.64805	6.79046	6.47461	6.84561	7.89993	7.84215	7.8977	7.88319	7.56943	6.90978	8.43598	7.73341	7.49675	6.92156	6.94279	6.96699	7.95164	7.32464	6.9453	7.10308	8.16078	8.56831	8.5538	8.05336	8.42499	8.35988	8.6767	8.35033	8.17919	7.85387	8.61609	7.95561	8.41384	8.00422	8.03461	8.74057	8.37996
2510009E07Rik	72190	1428097_at	RIKEN cDNA 2510009E07 gene	11				7.62193	7.69369	7.94612	7.08517	6.88344	6.81099	6.09484	6.63395	7.06189	7.18957	7.53909	7.84654	6.85523	6.98173	5.97982	6.89863	9.05959	9.59104	7.69389	6.48909	6.57972	9.22037	8.06059	6.16018	5.71894	9.06837	6.87127	6.71037	7.04444	7.36375	7.38862	7.32597	6.94046	6.84069	6.85776	6.63348	7.25619	7.70865	7.60014	8.23387	6.86895	6.48249
2600001M11Rik	76531	1429126_at	RIKEN cDNA 2600001M11 gene	2				6.825	6.50373	6.397	6.95885	6.77871	6.61546	6.16735	5.90935	5.5981	6.49271	6.54285	6.48467	6.4605	6.4894	6.54357	6.87103	6.9537	6.8367	6.40632	5.725	5.63099	6.60358	6.40662	6.26478	5.7946	7.02565	6.91519	7.01809	6.95807	6.76267	7.13534	7.13333	7.19416	7.03374	6.81445	7.10868	6.68684	7.3717	7.02252	6.89844	7.18483	6.71747
2600005O03Rik	72107	1452912_at	RIKEN cDNA 2600005O03 gene	3				6.40365	5.81748	4.66188	6.72769	6.23021	5.8156	4.29593	3.3934	3.75615	5.95062	5.86849	5.30679	5.6687	5.39628	4.47963	6.5595	7.20991	7.00627	4.44216	3.40444	3.46468	6.84577	5.98172	4.11484	4.24752	7.20057	7.19254	7.22899	6.72156	7.29522	7.34129	7.41874	6.989	6.85132	6.65391	6.99985	5.81789	5.72499	5.86943	5.45483	6.04958	5.95078
2600011C06Rik	67039	1437862_at	RIKEN cDNA 2600011C06 gene	31	GO:0006397 (mRNA processing)		GO:0000166 (nucleotide binding),GO:0003676 (nucleic acid binding)	8.12357	9.08564	9.0787	7.2936	7.95277	7.73209	8.13464	7.92107	8.2296	9.09845	9.19063	8.92966	7.94853	8.06162	8.18981	7.41864	7.6139	7.1275	6.73433	6.92863	7.05721	7.50103	7.42543	6.44678	6.82981	7.31727	6.75013	6.37259	6.75364	7.07775	7.02091	7.45676	6.78151	6.16615	6.00837	6.90468	7.95347	8.01787	7.96765	7.89824	7.59911	6.92505
2610016C23Rik	71804	1432013_a_at	RIKEN cDNA 2610016C23 gene	1	GO:0008150 (biological_process)	GO:0005575 (cellular_component)	GO:0003674 (molecular_function)	6.49749	5.88114	6.70831	6.85142	6.68685	6.41916	7.52458	6.95296	6.71159	6.41506	6.24364	6.35703	6.42785	6.31117	7.56689	6.72903	6.63701	6.33562	7.28894	6.80046	6.43569	6.43248	7.87782	6.62253	6.02684	6.7884	7.64493	7.68763	7.43999	7.39043	7.4218	7.28869	7.31041	7.38861	7.07812	7.51577	7.32142	6.66063	7.20168	6.50985	6.92407	7.08995
2610024E20Rik	225358	1442897_at	RIKEN cDNA 2610024E20 gene	31	GO:0007165 (signal transduction)	GO:0005622 (intracellular)	GO:0005096 (GTPase activator activity)	5.46916	6.68806	6.43275	5.77451	5.80528	5.87601	6.42447	6.63118	6.88761	6.84464	7.25716	6.52696	5.77313	6.23025	5.95533	5.99289	5.56682	5.59608	5.85853	5.79389	6.05684	5.40152	5.28623	5.63434	5.72238	5.90136	5.78276	4.84953	5.14698	5.43398	5.82921	5.86596	5.86088	5.49923	4.74748	5.8076	5.71647	6.79795	5.89914	6.14646	6.7017	5.92959
2610027C15Rik	230752	1454933_at	RIKEN cDNA 2610027C15 gene	17		GO:0016020 (membrane),GO:0016021 (integral to membrane)	GO:0005515 (protein binding)	7.50179	8.42641	9.8332	6.86773	6.85699	7.80987	8.94027	9.96405	10.0934	7.44107	8.72451	9.84392	7.15322	7.35846	8.15966	6.84252	6.92149	8.24388	9.5739	9.83748	10.0317	7.98286	8.69262	9.41477	9.70988	6.82805	6.43381	6.46994	6.31876	6.18662	6.66171	6.77374	6.45362	6.24158	6.37636	6.56378	7.04646	6.87644	6.25567	7.58824	6.19664	7.07781
2610027H17Rik	71811	1442445_at	RIKEN cDNA 2610027H17 gene	17				5.4223	7.03423	6.92558	4.19368	4.07963	6.1103	7.11012	8.37613	7.74034	6.67384	7.28631	6.69388	3.94733	5.27546	6.1441	3.76423	5.41222	8.30716	8.06338	7.9933	7.24712	5.73976	6.47179	6.11627	4.55261	5.68804	3.72343	3.71938	3.67697	3.94578	3.68905	4.31125	3.85973	3.50568	3.72611	3.54213	3.68534	5.41283	3.94857	4.99094	3.70365	3.54184
2610027L16Rik	67842	1451039_at	RIKEN cDNA 2610027L16 gene	10			GO:0003723 (RNA binding),GO:0005488 (binding)	7.83649	7.72384	7.7587	8.082	7.9381	7.71079	7.24378	7.18519	7.13502	7.94231	8.1599	7.76871	7.95809	7.89666	7.57556	8.09245	8.15395	8.03479	7.4202	7.42848	7.26633	7.9838	7.7281	7.17698	7.04454	8.30391	8.36367	8.25654	8.24863	8.29181	8.46568	8.44856	8.18578	8.03406	7.83475	8.17487	7.79904	7.86729	7.83136	7.67311	7.87065	7.99777
2610030H06Rik	67048	1452607_at	RIKEN cDNA 2610030H06 gene	29				10.8982	10.5845	10.6552	10.3322	10.9597	10.9422	11.0262	10.6656	10.858	10.3577	10.4717	10.3706	10.8373	10.6865	10.9001	10.7327	10.5284	10.5656	10.8202	10.9185	11.1202	10.8298	10.8172	10.8218	10.8072	10.4081	10.6535	10.5242	10.6849	10.6221	10.7111	10.7253	10.7848	10.7701	10.5517	10.5075	10.1975	10.104	10.1197	9.91337	10.1063	10.3347
2610036L11Rik	66311	1429156_at	RIKEN cDNA 2610036L11 gene	1		GO:0005634 (nucleus)		6.94894	6.72343	6.72186	6.7724	6.7592	6.58043	6.31314	6.28838	6.02191	6.5989	6.85193	6.72692	6.59052	6.37084	6.12608	6.7329	6.57011	6.71207	6.42541	6.14953	5.8854	6.66012	6.6943	6.55371	6.09522	6.73372	7.26182	7.40124	7.14162	7.08466	7.17764	7.12426	7.1793	6.93939	6.89396	7.24596	6.50497	7.05063	7.13681	6.99024	7.2773	6.53826
2610039C10Rik	66578	1428483_a_at	RIKEN cDNA 2610039C10 gene	3				8.69046	8.63604	8.08159	8.24866	8.42384	8.33803	7.64486	6.39433	6.63642	8.28031	8.55987	7.96139	8.34565	8.26017	7.59136	8.69965	8.04504	7.9451	7.06911	6.89503	6.75256	8.03827	7.83003	7.67704	7.26457	8.07295	8.64867	8.66398	8.43459	8.63124	8.53053	8.60935	8.58208	8.40611	8.28543	8.65874	8.13821	8.51482	8.69802	8.51829	8.49769	8.36258
2610207I05Rik	233789	1455657_at	RIKEN cDNA 2610207I05 gene	13	GO:0000184 (mRNA catabolic process, nonsense-mediated decay),GO:0006281 (DNA repair),GO:0006974 (response to DNA damage stimulus),GO:0018105 (peptidyl-serine phosphorylation),GO:0046777 (protein amino acid autophosphorylation),GO:0046854 (phosphoinositide phosphorylation)	GO:0005634 (nucleus),GO:0005737 (cytoplasm)	GO:0004428 (inositol or phosphatidylinositol kinase activity),GO:0004674 (protein serine/threonine kinase activity),GO:0005488 (binding),GO:0005515 (protein binding),GO:0016301 (kinase activity),GO:0016740 (transferase activity),GO:0016773 (phosphotransferase activity, alcohol group as acceptor),GO:0030145 (manganese ion binding),GO:0046872 (metal ion binding)	6.49118	6.5368	6.68562	6.46877	6.38127	6.55508	7.29822	7.61854	7.43262	5.94069	6.49214	6.68025	5.76662	5.78538	6.58544	6.15349	7.09651	7.14145	7.38115	7.70931	7.93531	6.31325	7.13419	7.37379	7.5575	6.88757	5.80009	5.78588	5.77423	5.34095	5.50307	5.57946	5.56171	5.06777	5.33842	5.733	5.40432	5.6571	6.10113	6.06478	5.34669	5.47715
2610209M04Rik	66618	1415714_a_at	RIKEN cDNA 2610209M04 gene	22	GO:0006397 (mRNA processing),GO:0008380 (RNA splicing)	GO:0005634 (nucleus)		9.29333	9.32121	9.61527	9.39882	9.0742	9.03867	9.24616	9.41939	9.50241	9.20628	9.31787	9.31739	9.35046	9.18487	9.12802	9.16299	9.47898	9.44424	9.70971	9.83065	10.0044	9.64382	9.59281	9.90463	9.80515	9.49507	9.19839	9.20901	8.9675	9.01577	9.24075	9.11189	9.11402	9.10418	8.91921	9.17199	9.04722	8.76746	9.20153	9.09342	8.87843	9.12911
2610507B11Rik	72503	1426820_at	RIKEN cDNA 2610507B11 gene	2	GO:0006099 (tricarboxylic acid cycle)	GO:0005615 (extracellular space)	GO:0008924 (malate dehydrogenase (acceptor) activity)	9.81595	9.94365	9.70995	10.5571	9.81749	9.58802	9.38818	9.50355	9.20212	10.0231	9.9507	9.81022	10.1653	10.0386	9.85442	10.1201	10.4114	10.1804	9.80454	9.46203	9.14455	10.1773	10.0729	9.8464	9.64231	10.4702	10.2641	10.3937	10.1359	10.3564	10.4171	10.5113	10.3077	10.48	9.91969	10.3178	10.2704	9.76802	9.98092	9.62302	9.91777	10.2709
2610510J17Rik	72155	1427105_at	RIKEN cDNA 2610510J17 gene	3		GO:0000775 (chromosome, pericentric region),GO:0005634 (nucleus),GO:0005694 (chromosome)		8.17797	7.82608	7.38625	8.70199	8.37754	7.92591	7.19203	6.81446	6.68613	8.26979	7.98308	7.65945	8.09899	7.58166	7.26122	8.34634	7.98562	7.96529	6.96385	6.84633	6.54834	7.95674	7.41987	7.27348	7.07952	8.07736	9.00131	9.07645	8.94246	9.01387	8.92247	8.80646	8.91017	8.98776	8.63831	8.9766	9.06139	8.97564	8.94469	8.83642	8.86107	8.68218
2700008B19Rik	217026	1424686_at	RIKEN cDNA 2700008B19 gene	17			GO:0005488 (binding)	7.17049	7.65499	8.21457	7.47038	7.04921	7.29807	7.93482	8.64509	8.64583	7.18905	7.6725	7.88966	7.24141	7.57105	7.52396	7.19173	7.14208	7.56281	7.94122	8.26803	8.39115	7.47552	7.57799	7.47821	7.4421	7.27017	6.90698	7.00507	6.97523	7.17371	7.19298	7.34502	6.90395	6.85928	6.59045	6.96628	6.90652	6.86708	6.86216	7.15909	6.64728	6.91535
2700078E11Rik	78832	1434162_at	RIKEN cDNA 2700078E11 gene	16	GO:0007049 (cell cycle)		GO:0003677 (DNA binding)	10.1474	9.92965	9.50713	10.2109	10.0379	9.70984	8.82497	8.85517	9.12239	10.2153	9.9407	9.53294	10.2026	10.1628	9.71246	10.1031	9.58399	9.53711	8.93275	8.78343	8.94672	9.7507	9.4635	9.6936	9.64865	9.65541	9.94313	9.90922	9.88666	9.76422	9.89838	9.74383	9.90038	9.93518	9.52543	9.85974	9.81091	9.8119	10.0113	9.59387	9.94677	9.94586
2700078K21Rik	101513	1432419_a_at	RIKEN cDNA 2700078K21 gene	14		GO:0005634 (nucleus)	GO:0008270 (zinc ion binding),GO:0016491 (oxidoreductase activity),GO:0046872 (metal ion binding),GO:0046914 (transition metal ion binding)	7.6907	7.75211	7.45268	8.10094	7.87221	7.48348	6.42989	6.91625	6.91082	7.82949	7.97502	7.56886	7.97955	7.94745	7.10993	8.00718	7.4131	7.31663	6.53225	6.74934	6.89564	7.69082	7.12402	6.95326	7.37746	7.63238	7.77603	7.81907	7.7795	7.63272	7.76799	7.74815	7.48921	7.67646	7.40418	7.78926	7.56965	7.29991	7.65956	7.52562	7.44639	8.1852
2700094K13Rik	72657	1436349_at	RIKEN cDNA 2700094K13 gene	3	GO:0045454 (cell redox homeostasis)		GO:0008430 (selenium binding)	8.74729	8.48766	8.49687	8.85884	8.47701	8.2245	7.77041	7.88155	7.58294	8.31241	8.63688	8.38059	8.51447	8.39386	7.85206	8.66862	8.46391	8.53507	8.13162	8.055	8.08611	8.3754	8.4823	8.46951	8.12053	8.73559	9.74237	9.71978	9.43964	9.26272	9.4982	9.41648	9.5431	9.51001	9.16311	9.82675	9.63732	9.5064	9.69369	9.48127	9.51238	9.57576
2700097O09Rik	72658	1428810_at	RIKEN cDNA 2700097O09 gene	12		GO:0005615 (extracellular space)	GO:0008168 (methyltransferase activity),GO:0016740 (transferase activity)	6.68578	6.44071	6.53241	6.98542	6.52196	6.29779	6.26679	6.43547	6.6412	6.12579	6.576	6.36866	6.34457	6.33758	6.22716	6.6979	6.92137	6.98064	6.82184	6.75869	6.71973	6.97507	6.90198	6.7001	6.32849	7.13106	6.65906	6.69571	6.48358	6.64927	6.72547	6.63458	6.56652	6.38468	6.29972	6.73315	5.63154	6.40631	6.51417	6.36817	6.71844	6.21521
2810001A02Rik	72146	1436323_at	RIKEN cDNA 2810001A02 gene	19				7.90848	7.4729	6.93636	8.3611	7.76914	7.23874	6.63525	6.69721	6.89031	7.85521	7.59115	6.84253	8.07227	7.74266	6.76129	8.43593	7.59	7.31664	6.63507	6.39907	6.67332	7.63482	6.92902	6.4229	6.57536	8.08348	8.01954	7.81866	7.52219	7.96546	7.95309	8.03342	8.08011	8.03888	7.41196	8.07438	8.34328	7.86433	8.33376	8.05752	8.53909	8.3602
2810002N01Rik	68020	1429248_at	RIKEN cDNA 2810002N01 gene	10				7.58203	7.26071	7.33327	7.78434	7.47573	7.21829	6.76899	6.94083	6.94077	7.38609	7.50742	7.33009	7.52652	7.28235	7.06956	7.56332	7.83529	7.75086	7.32546	7.23554	7.23099	7.68828	7.70556	7.55375	7.24969	7.94205	7.70533	7.73517	7.45958	7.80813	7.68893	7.75355	7.66371	7.48134	7.2063	7.58618	7.13141	6.87585	7.33931	6.92249	6.77935	7.51761
2810026P18Rik	72655	1428529_at	RIKEN cDNA 2810026P18 gene	10				7.9843	7.42164	6.97476	7.75993	7.4419	6.93124	5.88667	5.86063	6.41832	7.60756	7.70689	7.29466	6.70313	6.12869	5.91536	7.55733	7.86709	7.60904	6.48428	5.94965	6.43025	7.47286	6.41136	5.75682	5.37332	7.9929	8.0494	7.4931	7.79144	8.02422	8.02475	7.95503	7.87381	7.66887	6.90125	7.73418	7.12736	7.53682	7.05466	7.47575	7.2101	7.55525
2810417H13Rik	68026	1419152_at	RIKEN cDNA 2810417H13 gene	1		GO:0005634 (nucleus),GO:0005739 (mitochondrion)		8.39127	7.45855	7.25754	7.43811	8.20758	8.03376	7.21421	5.21907	4.78688	7.04626	7.35895	6.99709	7.47739	7.30067	7.05235	8.35676	7.34741	7.33083	6.76328	6.24106	5.35554	7.66215	7.32048	6.3874	6.00789	7.56325	9.35655	9.29926	9.29834	9.34325	9.76674	9.33884	9.70945	9.63847	9.44581	9.4912	7.21945	7.5324	7.53323	6.96732	7.61296	8.46702
2810433K01Rik	66468	1450496_a_at	RIKEN cDNA 2810433K01 gene	3	GO:0007049 (cell cycle),GO:0007067 (mitosis),GO:0051301 (cell division)			7.55465	7.14904	6.32122	7.22057	7.27813	7.02697	5.02062	4.38526	4.31049	6.9673	7.24744	6.52271	7.07297	6.86415	5.52907	7.43116	6.80174	6.96397	5.02429	4.39097	4.22617	6.66001	6.18464	4.66373	4.62158	7.06371	7.94517	8.11621	7.50575	7.97828	7.73337	7.84494	7.95141	7.68309	7.61586	8.00545	6.71865	7.20108	7.3913	6.91612	6.84584	7.33857
2810474O19Rik	67246	1429588_at	RIKEN cDNA 2810474O19 gene	24				9.86906	9.97451	9.67133	8.77362	9.4491	10.4857	10.6791	10.0834	10.0076	9.40671	9.69082	9.76114	9.29726	9.81305	10.27	9.0981	9.21386	9.93686	10.24	10.0142	9.86759	9.43719	10.2604	10.0721	10.0142	8.82811	8.57002	8.76559	9.39904	8.3663	8.5509	8.33868	8.64172	8.47821	8.76603	8.6384	8.78845	9.09794	9.09344	9.30433	8.36531	8.76411
2900002H16Rik	75695	1450449_a_at	RIKEN cDNA 2900002H16 gene	8				5.65688	5.1869	5.05499	5.43873	5.23632	4.93587	6.30012	8.42094	8.50006	5.09634	5.34875	5.00513	5.73613	5.42016	6.2281	5.03991	6.34523	5.84981	8.09248	8.94992	9.30206	6.04858	8.34143	9.54775	9.19405	6.35991	5.68381	5.60102	5.20907	5.40721	5.50307	5.6116	5.44311	5.12749	5.0443	5.32111	5.78719	5.36876	5.76168	5.54301	5.35677	5.60747
2900057D21Rik	72993	1427190_at	RIKEN cDNA 2900057D21 gene	21	GO:0007049 (cell cycle),GO:0007165 (signal transduction),GO:0007242 (intracellular signaling cascade),GO:0008283 (cell proliferation)	GO:0005575 (cellular_component),GO:0005634 (nucleus),GO:0005737 (cytoplasm),GO:0010008 (endosome membrane),GO:0016020 (membrane),GO:0016581 (NuRD complex)	GO:0003674 (molecular_function),GO:0005515 (protein binding)	7.14212	7.69976	8.84215	7.04653	6.83336	7.39137	8.95772	9.0949	8.76684	6.8563	7.67028	8.54606	7.09882	7.21114	8.01393	6.88318	7.41324	8.02739	9.16263	9.17843	8.74435	7.5364	7.98438	7.99669	7.68809	7.28362	7.04284	6.99533	6.91521	6.94849	7.14412	7.0728	6.95005	6.83858	6.65076	7.08331	6.7912	7.30652	7.0744	7.54586	6.98744	6.86433
2900064A13Rik	73024	1417344_at	RIKEN cDNA 2900064A13 gene	22		GO:0005615 (extracellular space),GO:0016020 (membrane),GO:0016021 (integral to membrane)	GO:0030246 (carbohydrate binding)	10.6454	10.5115	10.6424	10.5846	10.4041	10.2973	10.293	10.5525	10.6262	10.4998	10.4854	10.5261	10.5312	10.3394	10.2884	10.5417	10.6792	10.6567	10.6635	10.6209	10.7621	10.7575	10.6868	10.6365	10.6563	10.7327	10.6393	10.5478	10.4283	10.5351	10.5179	10.5694	10.5102	10.516	10.0187	10.548	10.6747	10.2184	10.5561	10.2814	10.2002	10.3896
3000004C01Rik	70218	1453226_at	RIKEN cDNA 3000004C01 gene	3	GO:0007018 (microtubule-based movement)	GO:0005874 (microtubule),GO:0005875 (microtubule associated complex)	GO:0000166 (nucleotide binding),GO:0003774 (motor activity),GO:0003777 (microtubule motor activity),GO:0005524 (ATP binding)	7.03704	6.56857	6.21909	7.07713	7.06291	6.49525	4.85921	4.52178	4.68537	6.99815	6.95148	6.4204	6.59833	6.62404	4.58406	6.99376	6.31475	6.0862	4.96952	4.83695	4.75625	6.24059	5.40491	4.6813	4.68163	6.51781	7.50587	7.65566	7.72512	7.34549	7.66275	7.62017	7.265	7.12322	7.09642	7.76843	7.58633	7.04047	7.5431	7.05328	7.11602	7.24076
3110001A13Rik	66540	1448509_at	RIKEN cDNA 3110001A13 gene	23	GO:0008150 (biological_process)	GO:0005575 (cellular_component)	GO:0003674 (molecular_function)	7.76677	8.30236	8.86987	7.31522	7.2823	7.90084	8.00165	5.89437	5.70625	7.37562	8.06846	8.49249	7.18816	7.17929	6.84845	7.49053	6.55593	7.50377	7.58571	6.32939	5.76623	6.8177	6.43214	5.54597	5.46835	6.539	6.88547	7.0769	7.05506	7.04333	7.34604	7.19033	7.10082	7.05524	6.87427	7.07692	7.16508	7.4689	7.58974	7.62305	7.00953	7.10407
3110001D03Rik	66928	1423317_at	RIKEN cDNA 3110001D03 gene	19		GO:0016020 (membrane),GO:0016021 (integral to membrane)		9.72703	9.32893	9.32291	9.78951	9.52928	9.35815	9.03083	9.07769	8.95632	9.43097	9.40387	9.25638	9.53015	9.39477	9.11112	9.74461	9.71169	9.50248	9.33852	9.22853	9.08089	9.71786	9.47791	9.19515	9.24737	9.79252	9.83001	9.74766	9.60928	10.0748	10.0295	9.9009	9.84346	9.77185	9.38243	9.89087	9.72094	9.29602	9.66823	9.39991	9.43613	9.83737
3110003A17Rik	73112	1426964_at	RIKEN cDNA 3110003A17 gene	21				11.3148	11.5002	11.9761	10.5967	11.0089	11.4664	11.9179	11.7259	11.6787	11.1513	11.3918	11.6749	10.8572	11.0905	11.3222	10.6707	10.9163	11.3901	11.7452	11.7181	11.7611	11.118	11.2385	11.328	11.1035	10.8288	10.7528	10.8633	11.0191	10.8098	10.7389	10.7187	10.6419	10.3972	10.7149	10.6853	10.4248	10.6532	10.5916	10.7984	10.2429	10.6933
3110043O21Rik	73205	1428468_at	RIKEN cDNA 3110043O21 gene	25				10.4178	10.199	9.54928	9.24026	10.2226	10.227	8.91422	9.13054	9.66372	10.026	9.71496	9.5879	9.76253	10.2779	9.53948	9.09052	9.63266	10.5387	9.18392	9.48375	9.79548	10.1477	9.65708	9.85477	9.93411	8.58396	8.81583	9.0848	10.0269	8.33694	8.37827	8.50723	8.77512	8.83421	9.41011	8.76985	9.79315	9.4935	10.0446	9.89665	8.75383	8.84667
3110068G20Rik	73198	1428600_at	RIKEN cDNA 3110068G20 gene	2				8.58515	8.08716	7.96466	8.599	8.2458	8.19371	7.34559	6.96831	6.80806	8.11683	8.29498	8.0258	8.24148	8.02681	7.66201	8.23503	8.25929	8.2399	7.70959	7.18468	7.11746	8.25171	7.95812	7.42188	7.34195	8.24941	8.36558	8.50905	8.33346	8.30003	8.55995	8.33684	8.30963	8.45748	8.20138	8.39585	8.19862	7.96114	8.47808	7.96774	8.24062	8.34183
3110082I17Rik	73212	1453007_at	RIKEN cDNA 3110082I17 gene	4				7.20876	7.0603	7.18607	7.67282	7.44418	7.1239	6.61944	6.65713	6.20976	7.04952	7.08885	6.88886	7.13591	7.0727	6.82243	7.42998	7.82172	7.6448	6.86103	6.4598	6.23236	7.20745	7.09053	6.53437	6.18738	8.0234	7.8083	7.78946	7.7182	7.74183	7.96127	7.84037	7.50131	7.39968	7.05126	7.6698	7.33467	7.21807	7.40944	7.10534	7.47268	7.30327
3732413I11Rik	74315	1452769_at	RIKEN cDNA 3732413I11 gene	17	GO:0006512 (ubiquitin cycle)		GO:0004872 (receptor activity),GO:0005515 (protein binding),GO:0008270 (zinc ion binding),GO:0046872 (metal ion binding)	9.68713	10.5753	10.9758	9.09955	8.94952	10.3057	10.2907	10.1669	9.74781	9.39108	10.5385	11.117	8.88884	9.40188	9.98471	9.11384	8.45807	9.34147	10.0594	9.8838	9.39974	9.12255	9.71094	9.68828	9.6132	8.59824	8.25535	8.56571	8.17404	8.20917	8.37324	8.54341	8.20489	8.07258	8.01051	8.34741	8.24494	9.03169	8.65785	9.37949	8.28273	8.38179
4632428N05Rik	74048	1416619_at	RIKEN cDNA 4632428N05 gene	5		GO:0005615 (extracellular space),GO:0016020 (membrane),GO:0016021 (integral to membrane)	GO:0004872 (receptor activity)	8.63531	8.47997	8.85832	8.1836	8.4326	8.26894	8.12622	6.88213	6.99943	7.76058	8.33362	8.68814	8.41924	8.19217	7.68817	8.77649	8.47717	8.36437	7.91882	7.4995	7.49347	8.77937	7.66221	6.63187	6.95384	8.65065	9.04473	9.08301	8.77958	9.18041	9.27773	9.28279	9.32594	9.13699	8.83492	9.25899	8.39792	8.4298	9.05331	8.80902	8.5856	9.63632
4732479N06Rik	215201	1433672_at	RIKEN cDNA 4732479N06 gene	14			GO:0008168 (methyltransferase activity),GO:0008757 (S-adenosylmethionine-dependent methyltransferase activity),GO:0016740 (transferase activity)	6.74351	6.44917	6.29906	6.94649	6.83566	6.60742	6.03037	5.76178	5.90082	6.06959	6.61328	6.31125	6.67676	6.60413	6.18948	6.89028	6.90818	6.90622	6.70958	6.35185	6.27073	6.96255	6.87219	6.31217	6.04912	6.85699	6.98635	7.19538	6.87321	7.13664	7.45249	7.30294	7.04627	6.92926	6.91261	7.03912	6.66525	6.72095	7.12252	6.71873	6.56398	6.96272
4833427B12Rik	272551	1452881_at	RIKEN cDNA 4833427B12 gene	7	GO:0006260 (DNA replication)	GO:0005634 (nucleus)		7.43481	7.3766	7.15135	7.69265	7.43223	7.30146	6.88578	7.3435	7.27686	7.40357	7.51418	7.08465	7.46933	7.31463	7.17062	7.51386	8.09657	8.27148	7.78485	7.53034	7.41769	8.18207	8.17993	7.91933	7.70059	8.38711	8.45453	8.41135	8.25664	8.45696	8.56848	8.4472	8.23509	8.10736	7.79849	8.29309	7.74807	7.41988	7.84535	7.44843	7.62142	7.86209
4833438C02Rik	107243	1436524_at	RIKEN cDNA 4833438C02 gene	15				6.24736	6.37392	6.85451	5.17986	5.93319	6.27421	6.38534	6.49267	5.98082	5.84131	6.4401	7.13982	5.20065	5.85733	5.97431	4.82052	5.72324	6.37597	6.44393	6.26853	5.87133	5.46245	5.50921	5.80813	5.70937	5.13741	4.66884	5.08024	5.29297	4.83288	4.54605	4.57828	4.90311	4.54784	4.97236	4.86769	4.90426	4.9853	5.71927	6.0642	4.09051	5.02628
4930404A10Rik	74847	1454111_at	RIKEN cDNA 4930404A10 gene	22				3.99077	4.13313	3.9962	4.12192	4.22879	4.36628	4.31924	4.48156	4.62834	4.00297	4.02711	4.0894	4.3781	4.19601	4.41071	4.12481	4.10494	3.87248	4.29898	5.27245	5.64382	4.02377	4.32096	4.89342	5.58277	3.97289	4.00577	4.27689	4.31213	4.12393	3.91267	4.13177	4.37492	4.35146	4.43913	4.28106	4.5146	4.24341	4.30551	4.34774	4.5699	4.34143
4930427A07Rik	104732	1455818_at	RIKEN cDNA 4930427A07 gene	3				6.34634	5.64642	5.96687	6.53322	6.36408	6.06817	5.39919	5.72361	5.52422	6.32219	6.28351	6.18328	6.33652	6.35856	5.44588	6.54412	6.31075	6.05856	5.90667	5.28675	5.38573	6.27173	5.79227	5.77185	5.85887	6.8248	6.99953	7.31018	6.79413	7.15617	7.06025	7.23798	6.93237	6.90372	6.4634	7.24746	6.51196	6.46991	6.44637	6.4612	6.62087	6.6974
4930504E06Rik	75007	1426655_a_at	RIKEN cDNA 4930504E06 gene	5				8.18045	8.35334	8.27634	8.43515	8.17002	7.98237	7.26124	6.72546	6.62193	8.26635	8.47981	8.75198	8.50368	8.25715	7.46493	8.4376	7.472	7.57679	6.56602	6.27251	6.32711	7.77032	7.5148	6.70072	6.28328	7.99077	8.10575	8.18109	7.59129	7.82818	7.55173	7.83476	7.62754	7.49641	6.96283	8.10669	8.19862	8.16921	8.19137	8.2677	8.4039	8.66762
4930570C03Rik	67739	1450410_a_at	RIKEN cDNA 4930570C03 gene	32				9.22716	9.26547	9.47479	9.77737	9.47526	9.09327	8.31101	8.74588	8.87986	9.44194	9.62814	9.61829	9.64259	9.46648	8.80055	9.72973	9.73225	9.61328	8.7181	8.184	8.35812	9.44491	9.24421	8.95042	8.82058	10.1718	10.3215	10.3302	10.0673	10.1659	10.1868	10.1573	9.97426	9.91349	9.53528	10.3975	10.1186	9.71721	9.84389	9.80864	10.0753	10.463
4930578N16Rik	75051	1431204_at	RIKEN cDNA 4930578N16 gene	8				3.88161	3.14321	3.58139	3.26568	3.31161	3.15481	4.85088	6.51038	7.18633	3.1787	3.3727	3.35445	3.55844	3.22713	4.51831	3.22239	3.19104	3.4099	5.87016	7.00354	7.25289	3.66203	5.68585	6.92971	6.58478	3.17782	3.20157	3.27469	3.21041	3.23561	3.26583	3.01557	3.08242	3.52788	3.18315	3.23813	3.64385	3.39995	3.27862	3.30688	2.91432	3.27592
4930579G24Rik	75939	1429364_at	RIKEN cDNA 4930579G24 gene	3				7.35819	6.63562	5.38607	6.97778	7.33738	6.81013	4.24485	3.77311	4.02581	6.9071	6.772	5.79533	7.16823	6.80731	4.59392	7.69536	7.00546	6.81676	4.33295	3.68264	3.86721	6.80555	5.75469	5.05273	4.57304	7.33428	8.59317	8.52057	8.08024	8.51619	8.50535	8.599	8.61149	8.35909	8.03086	8.3842	8.35578	8.1293	8.29809	7.4582	8.3849	7.80571
4930583C14Rik	75886	1428815_at	RIKEN cDNA 4930583C14 gene	22			GO:0016740 (transferase activity)	4.10539	4.39177	4.30733	4.12065	4.23274	4.21861	4.38319	4.70597	4.86601	4.4101	4.35776	4.31018	3.92146	3.9657	4.24837	4.10566	4.16174	4.26201	4.32869	4.57738	4.68095	3.98712	4.06803	4.19068	4.37063	3.97911	4.20306	4.23482	4.45259	4.07137	4.21203	4.44764	4.21839	4.32024	3.88489	4.29069	4.73829	4.14824	4.19131	4.09323	4.3715	4.25048
4933403F05Rik	108654	1434978_at	RIKEN cDNA 4933403F05 gene	23		GO:0016020 (membrane),GO:0016021 (integral to membrane)		5.62118	5.30404	5.83781	5.77434	5.3625	5.2637	4.76159	4.82699	4.90201	5.19923	5.09052	5.38695	5.15989	5.32156	4.51232	5.47401	5.71324	5.92001	4.96546	5.12928	4.79229	5.35449	4.90794	4.16879	4.02254	5.86342	5.27358	5.37437	5.08916	4.7248	5.26066	5.529	5.15865	4.99808	5.00826	5.17655	4.93121	5.47699	5.38079	5.23	5.08994	4.74346
4933412E12Rik	71086	1429422_at	RIKEN cDNA 4933412E12 gene	6				4.39327	4.37404	4.65168	4.54767	4.46622	4.7135	5.95242	6.62363	6.60705	4.55515	4.26343	4.5294	4.59155	4.62513	5.82199	4.5412	4.55563	4.58295	5.98633	6.51999	6.7319	4.3684	6.3418	6.73014	6.941	4.39686	4.50489	4.49372	4.6158	4.94965	4.63772	4.63625	4.68357	4.58825	4.54623	4.6266	4.24369	3.9758	4.38172	4.56909	4.60731	4.58879
4933437F05Rik	71275	1430314_at	RIKEN cDNA 4933437F05 gene	8	GO:0006118 (electron transport)			4.74228	4.26691	4.4116	4.57371	4.91449	4.75097	4.95235	5.36385	5.47382	4.78231	4.1903	4.71912	4.67032	4.80849	5.28437	4.61022	4.72694	4.67565	5.24701	5.75641	5.47789	4.58095	5.87642	6.46371	6.13709	4.40283	4.5338	4.5417	5.02555	4.70781	4.19767	4.41355	4.56273	4.64671	5.17957	4.6265	4.78165	4.51029	4.96285	4.80684	4.37599	4.52733
5031439G07Rik	223739	1435745_at	RIKEN cDNA 5031439G07 gene	19				10.0906	9.80863	9.31027	10.4766	9.92603	9.59831	8.52152	8.21572	8.46338	9.99876	9.93293	9.64691	10.2525	9.99307	9.22899	10.1314	10.1848	9.96271	9.07395	8.56544	8.37135	10.2935	9.38655	8.7973	9.07723	10.3011	10.5333	10.3974	10.2655	10.263	10.5974	10.4252	10.5932	10.5437	10.1028	10.6299	10.4304	9.92403	10.601	10.1084	10.1554	10.5896
5033414K04Rik	98496	1436999_at	RIKEN cDNA 5033414K04 gene	32				11.0995	11.0502	10.6161	11.5089	11.206	11.0337	10.6597	11.1317	11.244	11.0887	10.8885	10.5808	11.3805	11.234	10.7751	11.4315	12.1148	11.9539	11.0628	11.0885	11.2713	11.9428	11.3032	11.1894	11.1225	12.097	12.0652	11.9928	11.9118	12.1521	12.2414	12.2807	12.2258	12.0988	11.812	11.9742	11.0712	11.0379	11.1284	10.6881	11.113	11.8025
5133401N09Rik	75731	1424496_at	RIKEN cDNA 5133401N09 gene	9	GO:0005975 (carbohydrate metabolic process),GO:0008652 (amino acid biosynthetic process)		GO:0004765 (shikimate kinase activity),GO:0005524 (ATP binding),GO:0016301 (kinase activity)	7.81743	7.6199	7.80486	7.78982	7.68927	7.68583	8.37991	8.9225	8.90565	7.5119	7.74084	7.72549	7.7338	7.64141	8.16491	7.80464	7.95997	7.98119	8.76103	9.21034	9.35169	8.02709	8.53386	9.01637	9.3898	8.12163	7.8101	7.85663	7.79834	7.81595	8.00994	7.90354	7.80888	7.61881	7.30352	7.86443	7.96502	7.85588	7.79235	7.813	7.93883	7.98354
5230400M06Rik	74474	1432946_at	RIKEN cDNA 5230400M06 gene	11				6.05992	6.53338	6.46787	6.65632	6.32169	6.19626	5.80413	6.60794	7.88756	6.98854	6.36744	6.3725	6.26907	6.3251	6.08546	6.14549	6.91315	7.18291	5.90914	6.47143	7.08228	7.11311	7.04383	6.7098	7.11387	7.01434	5.73485	5.49886	5.75682	5.87783	5.50983	5.80308	5.85471	5.51122	4.88239	5.88377	6.10176	6.19964	6.48556	6.78957	6.47597	5.75133
5330421F07Rik	78286	1443230_at	RIKEN cDNA 5330421F07 gene	19				6.24259	5.64768	5.07035	6.93794	5.4806	4.76167	4.066	4.41141	5.57596	7.6943	6.45563	5.48376	6.53739	5.06846	3.77558	7.54609	5.95889	4.56773	3.57828	4.06353	5.04636	5.28679	3.72055	3.99075	4.82913	7.49259	7.5361	6.87951	5.15547	7.43498	7.66401	7.93856	7.40099	7.19562	5.07322	7.30927	6.45448	6.1755	6.73652	6.69773	7.62532	6.8968
5330431N19Rik	226162	1452603_at	RIKEN cDNA 5330431N19 gene	8				7.97671	7.97483	8.06329	8.53103	7.86566	7.76106	7.86246	8.72215	8.73169	7.94901	8.12121	8.04473	8.11202	7.93594	8.27749	7.92584	8.35963	8.27364	8.38548	8.73328	8.97791	8.25402	8.58001	8.95199	9.10489	8.44437	8.04701	8.11203	7.87776	8.13424	7.90337	7.91033	7.95866	7.90021	7.6156	8.051	8.06761	7.86257	8.22823	8.07476	7.94428	8.12328
5430434G16Rik	71385	1441976_at	RIKEN cDNA 5430434G16 gene	27				9.30774	8.00197	7.91463	8.25314	9.12091	7.45503	6.84909	6.3182	6.73686	7.87535	7.91233	8.05943	8.10584	6.4532	5.91128	7.43139	7.98102	7.28791	6.41099	6.40763	6.87984	7.37857	6.02829	6.25801	6.1024	6.62779	6.38661	7.11287	6.94627	6.65457	6.52948	6.38833	6.57692	6.41762	7.34461	6.42691	7.13721	6.53732	8.19818	7.20282	6.71749	6.54891
5430435G22Rik	226421	1424987_at	RIKEN cDNA 5430435G22 gene	30	GO:0006508 (proteolysis),GO:0006810 (transport),GO:0007264 (small GTPase mediated signal transduction),GO:0015031 (protein transport)	GO:0005764 (lysosome)	GO:0000166 (nucleotide binding),GO:0003924 (GTPase activity),GO:0004182 (carboxypeptidase A activity),GO:0005525 (GTP binding)	10.6419	9.78032	8.72805	11.5213	10.4475	9.25083	7.22574	9.20917	10.3905	10.9814	10.1556	8.95785	11.367	10.5623	8.42899	10.9904	10.975	10.2291	8.46692	10.2125	11.2799	11.4327	9.61201	11.2775	11.8985	11.4728	10.9983	11.0098	10.2571	10.986	10.8724	10.9931	10.8894	10.9339	10.2287	10.9371	10.2647	9.5762	10.6623	9.61668	10.5277	11.1752
5730405I09Rik	67974	1428971_at	RIKEN cDNA 5730405I09 gene	5	GO:0000074 (regulation of progression through cell cycle)	GO:0005634 (nucleus)		9.84188	9.61922	9.34937	9.97324	9.77328	9.41546	8.74595	8.06814	8.13515	9.5665	9.50901	9.19002	9.86663	9.52727	9.03664	9.97094	9.35604	9.26611	8.7264	8.54437	8.2531	9.46823	9.15094	8.68785	8.49069	9.41826	9.60444	9.35607	9.41863	9.44581	9.58987	9.45019	9.71095	9.60386	9.21407	9.52529	9.38779	9.26731	9.58851	9.28031	9.50306	9.51196
5730410I19Rik	66622	1454616_at	RIKEN cDNA 5730410I19 gene	19	GO:0006355 (regulation of transcription, DNA-dependent),GO:0006512 (ubiquitin cycle),GO:0015074 (DNA integration)		GO:0004842 (ubiquitin-protein ligase activity),GO:0005515 (protein binding),GO:0008270 (zinc ion binding),GO:0008907 (integrase activity),GO:0046872 (metal ion binding)	7.56325	7.10521	7.07512	8.00267	7.59043	6.76956	6.23878	7.16672	7.62328	7.70212	7.51584	7.19975	7.78319	7.35508	6.55051	7.86359	7.55849	7.16543	6.75981	6.96449	7.19293	7.63204	6.85936	6.98238	7.24418	7.86921	7.83397	7.89998	7.37357	7.84688	7.95925	7.90683	7.75382	7.69721	7.24932	7.75089	7.35805	7.15898	7.59738	7.21913	7.54543	7.78776
5730420B22Rik	70561	1427050_at	RIKEN cDNA 5730420B22 gene	18	GO:0006118 (electron transport),GO:0045454 (cell redox homeostasis)		GO:0009055 (electron carrier activity),GO:0015035 (protein disulfide oxidoreductase activity),GO:0030612 (arsenate reductase (thioredoxin) activity)	8.32317	8.01342	8.07303	8.33239	8.34992	8.14698	7.84505	7.04328	6.90743	7.86435	7.94979	7.62601	8.42281	8.11512	8.09526	8.57216	7.19692	7.10335	7.12207	7.07334	6.62967	7.34439	7.57762	7.40248	7.18177	7.06587	7.70741	7.64801	7.3353	7.48684	7.62551	7.71769	7.66662	7.53022	7.13716	7.88266	7.60876	7.87022	8.31079	7.97816	7.72234	8.19168
5730508B09Rik	70617	1429678_at	RIKEN cDNA 5730508B09 gene	13				8.09061	8.78752	9.86127	7.66387	7.63032	9.08064	10.872	11.098	11.0689	8.21532	8.89478	9.50503	8.11395	9.08201	10.3369	7.66043	8.12429	9.09944	10.6594	10.9969	10.9318	8.52179	10.1058	10.5291	10.2919	8.39135	7.7214	7.74906	7.85504	7.51992	7.7703	7.55413	7.72481	7.60032	7.55577	7.85818	8.16676	8.2944	8.16243	8.6358	8.19993	8.29955
5730596K20Rik	109168	1435890_at	RIKEN cDNA 5730596K20 gene	29	GO:0006955 (immune response)		GO:0003924 (GTPase activity),GO:0005525 (GTP binding)	9.02054	8.66756	8.73823	8.57919	8.81929	8.88209	9.03713	8.90065	9.22423	8.45991	8.71277	8.58398	8.6313	8.58875	8.91371	8.96996	8.40366	8.59303	8.87485	8.96546	9.22762	8.47409	8.97802	9.06265	8.99575	8.52177	8.75109	8.69577	8.61256	8.63333	8.80806	8.85793	8.96137	8.74054	8.47759	8.70255	7.95692	8.23297	8.25239	8.25316	8.14944	8.57516
5830415L20Rik	68152	1426279_at	RIKEN cDNA 5830415L20 gene	24				8.3818	8.1527	7.87055	7.27152	8.1206	8.39205	8.01774	7.3199	7.30564	7.77933	8.03853	7.79582	7.55349	7.86709	7.79483	7.5052	8.75146	9.66361	8.50461	7.98223	7.72858	8.47587	8.09574	7.72713	7.70682	7.87478	7.39271	7.70391	8.34524	7.29291	7.4319	7.60161	7.61598	7.5641	8.0325	7.4751	7.27727	7.65458	7.65172	8.00382	6.8286	6.93633
5830443L24Rik	76074	1418776_at	RIKEN cDNA 5830443L24 gene	8	GO:0006955 (immune response)		GO:0003924 (GTPase activity),GO:0005525 (GTP binding)	6.21748	4.43616	5.14634	6.56469	5.30449	4.58946	6.76027	6.27574	5.89336	5.15413	4.81344	4.50366	4.85811	4.0325	7.95971	6.38206	3.12742	3.37948	5.52729	6.10709	5.67248	3.51407	7.76887	8.12785	7.60133	3.31476	3.25788	3.36459	3.25369	3.20608	3.24064	3.21373	3.58335	3.57314	3.34389	3.50567	3.1001	3.2654	3.31731	3.25582	3.5589	3.33094
6-Sep	56526	1424181_at	septin 6	7	GO:0000910 (cytokinesis),GO:0007049 (cell cycle),GO:0051301 (cell division)		GO:0000166 (nucleotide binding),GO:0005515 (protein binding),GO:0005525 (GTP binding)	6.92037	6.68184	6.85655	7.06611	7.15969	6.88537	6.74519	6.51466	6.21565	6.88494	7.04591	6.64983	6.75848	6.40412	6.34995	7.013	6.83388	7.03129	7.42953	7.17021	7.15685	7.19851	7.11301	7.2188	6.77375	6.88532	7.12894	7.23106	7.14817	7.12242	7.11731	7.01322	6.98417	6.86879	6.72884	7.17045	6.57545	6.9959	6.85428	6.68786	6.77227	6.82679
6330409N04Rik	66674	1429723_at	RIKEN cDNA 6330409N04 gene	24				8.42399	8.48146	8.81754	7.7044	8.0744	8.55488	9.25608	9.38211	9.17789	8.10158	8.67688	8.88384	8.14901	8.02578	8.82909	7.88125	8.72155	9.23731	9.61285	9.72961	9.50548	8.75251	9.58638	9.99966	9.71081	8.35919	7.9417	7.93959	8.31481	7.51752	7.82383	7.67162	7.6059	7.20023	7.49248	7.82643	8.56638	9.09247	8.66179	9.02944	8.22859	7.72042
6330548G22Rik	76167	1430041_at	RIKEN cDNA 6330548G22 gene	9	GO:0008380 (RNA splicing)	GO:0005689 (U12-dependent spliceosome)	GO:0000166 (nucleotide binding),GO:0003676 (nucleic acid binding),GO:0003723 (RNA binding)	7.34165	7.30298	7.85764	6.97619	6.95855	7.23685	7.57582	8.38307	8.41813	6.80662	7.10808	7.16664	7.04253	7.35982	7.49265	6.847	7.26253	7.65484	7.77129	8.1893	8.28683	7.34143	7.56391	7.34013	7.45379	7.0934	7.02218	6.95977	6.96978	6.98785	6.95503	6.84003	7.15216	6.9169	6.79177	7.07095	6.51207	6.65104	6.57277	6.74429	5.97032	6.92446
6720422M22Rik	99946	1437798_at	RIKEN cDNA 6720422M22 gene	26				6.39096	7.44982	7.0731	5.0559	4.68476	5.85257	4.79695	3.85566	3.96501	6.30566	7.18282	7.15754	5.38127	4.73332	4.04026	4.46803	7.16503	7.92197	4.94449	4.17834	4.5273	6.89218	4.08844	4.04909	4.28293	5.8486	4.60446	4.75744	5.31536	4.19044	4.21526	4.47998	4.51477	4.40892	4.9214	4.53131	4.80754	5.78354	6.37827	7.1963	4.55404	4.57254
6720460F02Rik	109212	1452073_at	RIKEN cDNA 6720460F02 gene	3				7.51813	7.12471	6.37148	7.84352	7.74603	7.02888	5.47779	4.73515	4.80297	7.66191	7.42897	6.60288	7.66378	7.30356	5.37141	8.01587	7.0434	6.75048	5.32736	4.87534	4.95634	7.12347	6.08832	4.96739	5.43886	7.33711	8.74476	8.84552	8.48915	8.37025	8.44787	8.31358	8.32794	8.35244	8.06152	8.76557	8.35287	8.28027	8.57236	8.25738	8.63502	8.30668
6720463M24Rik	77744	1429478_at	RIKEN cDNA 6720463M24 gene	19	GO:0007049 (cell cycle),GO:0007067 (mitosis),GO:0051301 (cell division)			5.14335	4.93211	5.09195	6.44435	4.66444	4.42201	4.05646	3.73226	4.39533	4.95975	5.53791	5.07318	5.10257	4.67165	4.07365	6.34137	5.69812	5.45567	4.61858	3.83902	4.34677	6.04138	4.49	4.2742	4.36192	7.52989	6.64728	6.44429	5.37683	6.32916	6.45667	6.42253	6.17236	5.77937	4.99991	6.63283	5.49679	5.71154	5.93039	6.03976	7.00824	5.97404
6720467C03Rik	68099	1451570_a_at	RIKEN cDNA 6720467C03 gene	7			GO:0005515 (protein binding)	8.14357	7.8814	7.73138	8.24113	7.94897	7.86795	7.5861	7.35038	7.09636	7.74135	7.71549	7.6729	7.8802	7.37678	7.80242	8.13458	7.57142	7.67014	7.66612	7.57077	7.40541	7.64856	7.9094	7.75946	7.67813	7.83383	8.2184	8.19203	7.87751	8.13273	7.96203	8.18758	8.19986	7.9664	7.64881	8.13011	7.76147	7.77197	7.99348	7.80725	7.6627	8.0697
8430410A17Rik	232210	1423786_at	RIKEN cDNA 8430410A17 gene	10				6.66593	6.57292	6.50345	6.68276	6.56508	6.42325	5.90067	5.86577	6.04392	6.71987	6.73107	6.69994	6.76097	6.70457	6.27592	6.63695	7.00162	6.99272	6.08799	5.57772	5.91381	6.83643	6.34327	6.28723	6.32619	7.21916	7.01572	6.99496	6.82571	6.96346	7.12762	7.28024	6.98048	6.83045	6.65544	7.09149	6.64827	6.01211	6.66322	6.53213	6.22594	6.88883
8430436C05Rik	71504	1430097_at	RIKEN cDNA 8430436C05 gene	19				7.74852	7.94738	7.52834	8.87616	6.84474	6.84041	4.06816	4.85027	5.39875	7.36238	7.88255	7.10955	8.69172	7.61101	6.14209	9.28146	8.23816	7.90926	4.39406	5.16536	6.1306	8.6297	6.07623	7.3225	8.08184	9.12823	8.50276	8.27316	6.49193	8.61618	8.32629	8.3579	8.77279	8.3887	6.99085	8.54245	6.08897	6.65215	7.41782	5.97708	7.90079	8.98433
9030607L20Rik	71513	1430103_at	RIKEN cDNA 9030607L20 gene	13				5.62142	5.71371	6.33635	5.74328	5.59748	6.63896	6.9444	7.14738	7.01765	5.59689	5.6931	6.01156	5.33526	6.78954	7.11445	5.09053	5.90239	7.23302	7.28553	7.36638	7.13332	6.86055	7.23247	7.335	7.14714	5.63813	4.49151	5.04296	5.02565	4.68972	4.48184	4.95195	4.79241	4.67424	5.13563	4.74731	4.96564	4.85839	5.9237	5.26707	4.80135	4.6932
9030617O03Rik	217830	1424226_at	RIKEN cDNA 9030617O03 gene	7		GO:0005739 (mitochondrion)		7.3572	7.29137	7.29406	7.61507	7.3507	7.4376	7.29185	7.43715	7.33639	7.28864	7.49149	7.1868	7.13216	7.10998	7.26436	7.40271	8.09143	8.15775	8.07289	7.58113	7.22768	8.22069	7.93696	7.73303	7.13583	8.06004	7.84512	7.94717	7.72903	7.84501	7.98222	8.08907	7.93049	7.75601	7.59074	7.95507	7.62929	7.25512	7.56467	7.37125	7.03029	7.86612
9030625A04Rik	210808	1455263_at	RIKEN cDNA 9030625A04 gene	13				9.507	9.72213	10.163	9.07843	9.42334	10.3544	11.2744	11.7594	11.6003	9.24107	9.85836	10.4766	8.43988	9.35918	10.867	8.73037	8.90674	10.1114	11.1109	11.3878	11.4915	9.81477	10.9345	11.4546	11.4269	8.45831	8.44278	8.57004	9.05815	8.35617	8.49532	8.22485	8.64128	8.41007	8.87794	8.66547	8.55742	8.85098	9.04794	9.50279	8.02146	8.80377
9130005N14Rik	68303	1417272_at	RIKEN cDNA 9130005N14 gene	17				6.70017	7.11891	7.79119	6.23941	6.35539	6.53848	7.15006	7.13592	7.42566	6.4596	7.15719	7.64655	6.60565	6.32659	6.95204	6.23898	6.3167	6.89854	7.25357	7.34809	7.39109	6.91912	7.08583	6.59681	6.86358	6.38662	5.68661	6.19348	6.02312	5.6321	6.20155	5.96211	5.8158	5.73458	5.77531	5.97654	6.26446	5.70917	6.41972	6.35261	6.1518	6.15003
9130011J15Rik	66818	1415705_at	RIKEN cDNA 9130011J15 gene	5				8.19044	7.76496	8.01029	8.0306	8.16118	8.12817	7.62869	7.4771	7.42339	7.7355	7.91106	8.20847	7.88259	7.74982	7.67995	8.1941	7.91237	7.90639	7.4394	7.32343	7.24838	7.81681	7.66024	7.55141	7.2281	8.09153	8.17519	8.30531	8.09816	7.99683	8.0499	8.13475	7.99932	7.85899	7.82905	8.22283	7.7026	8.02248	8.18184	7.91516	8.04263	8.25869
9130017C17Rik	71607	1426299_at	RIKEN cDNA 9130017C17 gene	9	GO:0006810 (transport),GO:0007154 (cell communication),GO:0015031 (protein transport)		GO:0005488 (binding),GO:0005515 (protein binding),GO:0035091 (phosphoinositide binding)	8.29196	8.52013	8.84926	7.78681	8.18786	8.56311	8.9	9.17408	9.23067	8.20194	8.41413	8.88575	8.08076	8.57766	8.88848	8.07689	7.98739	8.47145	8.56432	8.97839	9.15468	8.40975	8.66844	8.44269	8.94272	7.92963	8.06508	8.14334	8.39794	8.05143	8.21642	8.16939	8.04593	8.03122	7.83856	8.26365	8.18228	8.12216	7.9273	8.23887	7.87032	7.95611
9330159M07Rik	319673	1441092_at	RIKEN cDNA 9330159M07 gene	22				4.01703	5.17962	5.56943	3.90691	3.94058	4.23027	4.59582	4.16681	4.20441	4.13179	5.24691	4.95821	4.21139	3.94355	4.76355	4.00315	3.80483	4.28931	4.06641	3.81891	3.86607	4.05358	4.11894	3.83239	3.81312	3.96324	4.05614	3.828	3.67725	3.94942	4.051	3.77389	3.91385	3.89822	3.67475	3.92537	4.08793	4.09291	3.98579	4.62089	3.80758	3.91962
9330180L21Rik	77268	1429749_at	RIKEN cDNA 9330180L21 gene	16				8.30025	8.05263	7.54679	8.4666	8.08997	7.90696	6.8887	6.00087	6.30195	8.30277	8.15029	7.83104	8.3996	8.1672	7.39083	8.37449	7.86184	7.80614	6.75129	6.41111	6.40016	8.00636	7.34462	7.13428	7.21273	7.92845	8.03373	7.97068	7.79921	8.0726	8.10738	8.0795	8.10911	8.03933	7.60623	8.00747	7.66208	7.43689	7.77768	7.33645	7.72138	8.04712
9430083G14Rik	68117	1418384_at	RIKEN cDNA 9430083G14 gene	8		GO:0005739 (mitochondrion),GO:0005743 (mitochondrial inner membrane)		7.31823	7.37973	7.76299	7.43546	7.10471	7.11644	8.15304	8.99153	8.9854	7.08355	7.38416	7.45451	7.36835	7.00394	8.10648	7.14933	7.18706	7.40082	8.4695	9.00374	9.18277	7.59803	8.37507	8.91664	9.09913	7.19801	7.35259	7.25057	7.02815	7.09742	7.11863	7.0424	7.25289	7.15055	6.97676	7.1958	7.01642	7.15488	7.29535	7.41017	6.98288	7.23252
9530082P21Rik	638247	1441996_at	RIKEN cDNA 9530082P21 gene	8				5.48005	5.7524	5.94083	5.45513	5.74894	6.09606	6.58614	7.09901	7.05159	5.71852	5.44706	5.96985	5.70058	5.95799	6.50472	5.73374	5.54805	5.67128	6.16796	6.29578	6.18392	5.47856	6.08145	6.02336	6.18537	5.44217	5.70672	5.64675	5.83837	5.76225	5.68264	5.47124	5.67243	5.69803	5.86692	5.54428	5.34929	5.38492	5.36336	5.59641	5.29174	5.56619
9630025H16Rik	319878	1455680_at	RIKEN cDNA 9630025H16 gene	9				6.87777	6.54951	6.79837	7.0872	6.54488	6.65048	7.10793	7.70393	7.7714	6.11649	6.51216	6.8823	6.1593	6.6425	6.64625	6.77111	7.08593	6.98776	7.27675	7.45078	7.38497	6.75783	7.39076	7.36603	7.31833	7.14976	6.62979	6.5056	6.44496	6.56252	6.64122	6.91887	6.51387	6.1762	6.3238	6.55967	6.13354	6.41345	6.74918	6.22835	6.76952	6.47654
9930017N22Rik	320403	1456758_at	RIKEN cDNA 9930017N22 gene	15				8.61523	8.28992	8.63659	6.21067	6.35297	7.34544	7.67523	6.85013	6.87235	7.3101	7.54406	8.13166	6.75561	6.5598	6.84542	5.63704	7.67289	8.8033	8.19324	7.99894	7.92181	8.54587	7.48878	6.34902	6.54592	6.33922	4.91034	5.55405	6.16935	5.79623	5.3627	5.49981	5.13569	4.6325	6.00857	5.32839	6.03781	6.68051	7.14211	7.75741	6.41558	4.88438
A030007L17Rik	68252	1435695_a_at	RIKEN cDNA A030007L17 gene	13				6.16954	6.08544	6.91671	4.664	5.47471	6.13004	7.56151	8.25614	7.97561	5.28724	5.85689	6.56533	5.10013	5.70573	7.13837	4.71351	6.20533	6.84816	7.95431	8.09409	8.36156	6.23742	7.73603	8.12749	7.80454	5.78172	5.11309	5.47648	6.15099	4.96134	5.33591	5.37697	4.74781	4.78617	5.7031	5.07969	5.10005	5.16825	5.35757	5.56039	4.58594	5.06637
A430093F15Rik	403202	1444299_at	RIKEN cDNA A430093F15 gene	11				4.46773	5.23773	5.64726	3.81672	4.06247	4.53564	4.67714	5.42076	6.01369	4.43046	4.85176	6.1191	3.78993	4.16651	3.9573	3.82509	3.79372	4.19352	4.87637	4.77663	5.1928	4.14307	3.73536	4.20319	4.15876	3.85872	3.97776	4.14982	4.32357	4.03468	4.17906	4.15458	4.06826	4.03504	3.99705	4.1264	3.61717	4.16506	3.82641	4.22136	3.7679	4.09991
A530023O14Rik	244183	1444179_at	RIKEN cDNA A530023O14 gene	8		GO:0005622 (intracellular)	GO:0005515 (protein binding),GO:0008270 (zinc ion binding),GO:0046872 (metal ion binding)	4.46895	4.33323	3.89763	4.53789	4.4757	4.77951	6.10095	7.5109	7.73878	4.26435	4.30451	4.50041	4.15559	4.59194	5.96178	4.4114	4.5823	4.96587	6.8755	7.94035	7.68671	4.61427	6.2149	7.63581	7.78752	4.36365	4.68893	4.75302	4.91024	4.31575	4.72835	4.72091	4.38933	4.29543	4.145	4.74809	4.44489	3.75683	4.0519	4.30078	4.25152	4.54669
A530088I07Rik	212167	1435596_at	RIKEN cDNA A530088I07 gene	9	GO:0006508 (proteolysis)		GO:0004197 (cysteine-type endopeptidase activity),GO:0008233 (peptidase activity)	6.94534	7.33697	7.88832	6.45729	6.67675	7.44762	7.95001	9.20267	9.26511	6.04744	7.18385	7.5168	6.14645	7.03512	7.93024	6.73111	7.36902	7.85082	7.99883	9.05224	9.12957	7.48839	8.54837	8.75836	8.66712	7.49051	7.15846	7.10298	7.36932	7.22212	7.03995	7.1803	7.2719	7.24653	6.93745	7.32364	6.64326	7.40705	6.68297	7.10643	6.47019	7.09246
A630012P03Rik	319912	1439310_at	RIKEN cDNA A630012P03 gene	8				3.32112	3.3463	3.30606	3.35266	3.13451	3.43137	3.86279	5.92252	5.98778	3.28826	2.9491	3.3965	3.53772	3.66682	3.99064	3.23791	3.40775	3.44067	4.20819	5.14446	5.44042	3.40347	4.71336	5.3421	5.70949	3.42001	3.19934	3.31506	3.25842	3.32771	3.06688	3.40854	3.39994	3.08641	3.36335	3.4177	3.24083	3.75196	3.32349	3.37986	3.17611	3.27634
A630077B13Rik	215900	1436576_at	RIKEN cDNA A630077B13 gene	13				7.57211	8.66795	10.0179	5.79481	6.46541	9.87955	12.5351	12.3997	11.976	6.53091	7.63842	8.83367	7.10828	10.321	12.6529	5.94125	5.5024	9.10385	12.5179	12.4261	12.1961	8.81001	12.2254	12.4697	11.957	5.01872	5.1528	5.34118	6.43845	5.36687	5.05263	5.24697	5.3683	5.20805	6.28193	5.61064	5.50155	5.84066	6.06021	7.41542	5.14116	5.81221
A630081D01Rik	98754	1457759_at	RIKEN cDNA A630081D01 gene	27				10.0516	8.58294	8.96639	8.51451	9.97908	8.99473	7.57672	6.71687	7.63918	9.40097	8.36893	8.76924	8.75706	7.9778	8.08549	7.09969	10.1137	9.21548	7.5968	7.28122	7.68084	9.52025	7.85702	7.5745	7.2165	6.98413	6.53036	8.23561	8.71407	6.41414	6.12754	6.48314	6.50875	7.27354	9.1021	6.48064	8.80021	7.53822	9.84103	8.84632	6.56224	6.34381
A830007P12Rik	227612	1424829_at	RIKEN cDNA A830007P12 gene	32	GO:0051085 (chaperone cofactor-dependent protein folding)	GO:0005783 (endoplasmic reticulum)	GO:0000166 (nucleotide binding),GO:0005524 (ATP binding),GO:0017111 (nucleoside-triphosphatase activity)	8.17154	7.86708	8.07262	8.77927	8.0347	6.67577	6.12137	7.5913	8.03935	8.22326	8.12384	8.24201	8.53862	7.85699	6.28672	8.81193	8.57009	7.66986	7.15401	8.03221	8.74966	8.77376	7.17768	7.4103	8.50694	9.07271	8.48486	8.50666	7.7344	8.90651	8.9386	8.90186	8.49114	8.48205	7.72176	8.61439	8.09274	7.64536	8.3318	7.59224	8.34699	8.63287
A930007B11Rik	77944	1440260_at	RIKEN cDNA A930007B11 gene	12				5.04551	6.22756	6.33611	5.46491	4.61505	4.84636	5.35263	4.85572	5.31144	6.29342	6.60745	6.37041	4.87427	4.91072	4.71172	6.12181	5.36119	5.86254	5.09497	4.99043	4.96388	5.69802	5.46122	4.22382	4.48176	6.68176	5.31239	4.08842	4.40224	5.02157	5.15079	4.99887	5.12886	4.63494	3.73674	4.89098	4.69572	5.79575	4.81319	5.3998	6.14094	4.77936
AA407452	57867	1456791_at	EST AA407452	24		GO:0005622 (intracellular)	GO:0003676 (nucleic acid binding),GO:0008270 (zinc ion binding)	5.57791	6.97118	7.0628	5.04923	6.11288	7.3346	9.16982	8.47512	8.05095	6.17826	6.91884	6.55358	6.13207	7.27219	8.36838	5.60635	5.08192	5.79788	7.22619	7.20211	6.94706	5.43405	7.44388	6.04972	6.00926	5.10606	5.56116	5.03976	5.65302	5.41504	5.22126	5.55156	5.2046	5.14698	5.31467	5.23354	5.02732	5.55856	5.30178	5.6586	4.7493	5.27057
AA467197	433470	1434046_at	expressed sequence AA467197	13		GO:0005634 (nucleus)		8.29373	8.84469	9.81939	6.50324	7.11619	9.5594	11.9725	12.5331	12.6151	8.03737	8.90217	9.63543	6.95116	8.53599	11.4794	6.18141	6.55981	8.69871	11.6034	12.0356	12.1192	7.20169	10.5929	11.4711	11.4682	6.35055	5.63559	5.9383	6.2012	5.28651	5.38047	5.46282	5.30189	5.14863	5.61045	5.70161	6.09456	6.59148	6.23306	7.29787	5.41639	5.61183
AA536743	100532	1427243_at	expressed sequence AA536743	18				9.65288	9.08703	8.32174	9.51104	9.29943	9.1698	7.9856	6.81715	6.95702	9.24098	9.23307	8.65342	9.43038	9.28769	8.22977	9.47737	7.894	8.11817	7.69832	7.14011	7.25124	8.69613	8.49264	9.19003	9.21624	8.01367	9.07502	8.84469	8.53936	8.57794	8.75403	8.61312	8.86559	8.79173	8.38423	9.01298	8.91659	8.73194	9.2395	8.89099	8.9381	9.50014
AA960436	101985	1448583_at	expressed sequence AA960436	6				8.02438	7.99584	8.7305	8.17016	8.02054	8.63552	10.3021	10.1593	9.83326	8.00566	8.13734	8.37978	8.02008	8.49123	10.19	8.0036	7.71413	8.06599	10.0526	10.1768	9.9562	8.07259	9.88087	10.0724	10.1102	7.79163	7.85093	7.92766	7.76673	7.86721	7.84912	7.76538	7.3393	7.44119	7.19056	7.74468	7.69822	7.77447	7.73118	7.70739	7.61588	7.96906
AI225934	98884	1441001_at	expressed sequence AI225934	31				4.99962	6.81073	6.2961	5.34058	4.95521	5.20806	5.19609	4.89973	4.63143	6.11649	6.93447	6.36553	6.11861	5.82418	5.26506	4.67929	5.12446	5.31548	4.63663	4.49605	4.04331	5.28792	4.66639	3.89519	3.75545	4.87612	4.42766	4.24291	4.59312	4.63042	4.89607	4.71002	4.56619	4.37727	4.31023	4.44888	4.94881	6.25469	5.74177	5.829	6.02714	4.4119
AI314180	230249	1452122_at	expressed sequence AI314180	9		GO:0005634 (nucleus),GO:0005783 (endoplasmic reticulum),GO:0005829 (cytosol),GO:0043234 (protein complex)	GO:0005488 (binding)	7.61488	7.63774	7.73543	7.72521	7.47216	7.61877	8.05859	7.95055	7.84351	7.50892	7.60813	7.59735	7.65876	7.66763	8.35987	7.43413	7.91102	7.8963	7.96824	8.0878	7.89649	7.77436	8.09048	8.16628	8.07062	7.83795	7.3756	7.53426	7.5024	7.3407	7.69979	7.65113	7.50055	7.66399	7.44516	7.49643	7.59683	7.199	7.51466	7.46507	7.1595	7.36257
AI413782	104799	1416096_at	expressed sequence AI413782	30				10.3192	10.0759	9.67393	10.6193	10.2773	10.1038	9.72601	10.3867	10.6496	10.1846	10.0789	9.71633	10.3255	10.1825	10.2849	10.3835	10.0875	10.1708	10.1095	10.4931	10.8215	10.5791	10.678	10.9697	11.2605	10.2062	10.3393	10.3809	10.2673	9.99747	10.0804	9.96513	9.93338	9.93257	9.73235	10.2698	10.0235	9.37817	9.95236	9.616	9.61361	10.3114
AI426953	103207	1442018_at	expressed sequence AI426953	28				7.51115	8.795	8.8507	5.86306	7.12997	6.9172	6.71659	5.47178	5.72166	7.99422	8.33047	8.27462	8.06192	7.13821	8.29861	5.27838	7.38005	6.38393	5.35729	4.67453	5.13986	5.26036	6.54499	6.18885	6.57766	6.46023	5.75549	6.84491	7.07901	5.72945	5.80574	6.20911	6.0985	6.01068	6.69045	6.22877	7.99645	7.94906	7.45744	7.22841	6.39769	6.80668
AI451617	209387	1438716_at	expressed sequence AI451617	6		GO:0005622 (intracellular)	GO:0004872 (receptor activity),GO:0005515 (protein binding),GO:0008270 (zinc ion binding),GO:0046872 (metal ion binding)	6.51931	7.15622	7.71298	7.39959	6.9319	7.53015	10.0722	10.1997	9.8858	7.23359	7.45628	7.28313	7.07297	7.68738	9.96222	7.01839	7.07702	7.5661	9.51578	9.88756	9.70343	7.74018	9.61145	9.40911	9.32448	7.07561	6.67308	6.48482	6.65737	7.01596	6.75581	7.0298	6.59689	6.75737	6.31986	6.56145	5.53824	5.83103	5.57748	5.39085	5.52495	6.40304
AI467606	101602	1433466_at	expressed sequence AI467606	19		GO:0016020 (membrane),GO:0016021 (integral to membrane)		6.73348	6.73247	6.86181	7.89462	6.54352	4.8932	4.56183	5.77859	6.14701	6.93531	7.30698	6.71779	7.72361	5.88722	5.55696	8.28089	6.49389	5.30349	4.94	5.84197	6.3847	7.2162	5.63975	6.39594	7.28531	7.94767	7.88566	7.73814	5.90058	8.02054	8.14049	8.11332	7.54146	7.42096	5.88877	7.93496	6.55693	6.84724	6.97692	6.37547	7.68182	8.03245
AI504432	229694	1455161_at	expressed sequence AI504432	15				7.79453	8.23307	7.99246	5.80315	6.28596	8.84806	8.09681	8.7498	9.1939	6.38724	7.91251	7.95814	4.9086	6.56617	6.81429	5.52017	7.17556	9.09342	9.01446	9.05101	8.99867	7.08826	7.21321	7.22017	6.27593	6.13107	5.59893	5.7865	6.31151	5.75529	6.22237	5.88306	6.14795	5.21328	6.7381	5.61433	4.58183	5.8649	5.76275	6.39015	5.53966	4.89957
AI586002	101130	1455616_at	expressed sequence AI586002	27				8.21111	7.95704	7.16458	6.54759	7.93584	7.50181	6.9296	6.66204	6.94298	7.99824	7.72791	7.13651	7.48877	7.68994	6.98048	6.24864	9.2876	8.98343	7.28402	7.27057	7.31662	8.63224	7.53036	7.38581	7.82525	7.16989	6.20874	6.94015	7.64339	6.22693	6.4619	6.29382	6.26483	6.70585	7.3454	6.08999	7.54833	7.85721	8.41939	8.19092	6.72209	5.95232
AI838057	101160	1434447_at	expressed sequence AI838057	11				3.61379	3.89612	5.30036	3.32508	3.66909	4.03752	4.59598	5.24845	5.16345	3.59908	4.0443	5.20173	3.59015	3.5296	3.86021	3.50519	4.09274	6.1108	5.47757	5.93716	5.4941	3.79567	4.63769	4.8063	4.78312	4.16904	3.80115	3.68522	4.07058	3.65555	3.83188	3.45	3.62279	3.53891	3.88758	3.61975	4.18378	4.6928	3.78055	4.73313	3.79721	3.6592
AI848100	226551	1460573_at	expressed sequence AI848100	26	GO:0006605 (protein targeting)			8.68083	8.59965	9.33042	7.74751	8.30746	8.48189	8.27012	7.40216	7.99634	8.01579	8.37601	9.03477	8.39719	8.12511	7.98045	7.78571	7.91543	7.82435	7.07487	7.73653	7.87263	7.42646	7.05281	7.28279	7.04443	7.36459	7.43922	8.02856	8.06104	7.37841	7.78543	7.63612	7.54292	7.57426	8.1732	7.57787	8.04198	7.78492	8.7032	7.76147	7.78208	7.43202
AL033314	56463	1444538_at	Expressed sequence AL033314	31	GO:0006350 (transcription),GO:0006355 (regulation of transcription, DNA-dependent),GO:0008150 (biological_process)	GO:0005575 (cellular_component),GO:0005634 (nucleus)	GO:0003676 (nucleic acid binding),GO:0003712 (transcription cofactor activity),GO:0004518 (nuclease activity)	6.46983	7.27051	7.71026	6.2027	6.43213	6.40806	7.82217	7.73057	7.34379	7.46709	7.34318	7.13455	6.53739	6.64816	8.28261	6.42012	6.22598	5.57736	6.58923	5.94506	5.70641	5.55079	6.78124	5.68463	6.10546	6.22662	5.82179	5.55885	5.81511	5.72368	6.02435	6.00905	5.89673	5.68817	5.55695	5.87407	6.44892	6.17484	5.76223	5.4569	6.33265	5.27442
AU022434	106337	1442098_at	expressed sequence AU022434	16				8.53557	8.41539	7.58139	8.7067	8.47339	8.36721	7.30737	6.98136	6.8534	8.61444	8.58501	7.80445	8.77488	8.6328	7.94243	8.55688	7.86109	7.94157	7.44461	6.82986	6.85121	8.29127	8.12568	7.13041	7.30407	7.92038	8.09821	8.02655	7.97458	7.92493	8.06192	7.98911	8.05338	8.09701	7.6522	8.1342	8.63646	8.43679	8.34926	8.28198	8.55815	8.45649
AU023006	102683	1455352_at	expressed sequence AU023006	5				7.46326	7.06658	7.01508	7.57108	7.0846	6.91805	6.54454	5.7785	6.17056	7.17793	7.22061	6.92772	7.33897	7.2994	6.77358	7.41677	6.83211	7.18285	6.78869	6.51833	6.22459	7.08734	6.75671	6.27436	6.19701	7.13368	6.94956	7.14562	6.82852	6.98562	7.11039	7.24621	7.08104	6.82967	6.71707	7.02901	5.88729	6.59684	6.82649	6.45957	6.95453	6.86001
AW112010	107350	1434372_at	expressed sequence AW112010	13				7.98914	10.2216	11.4811	6.96431	6.99957	11.1429	13.3088	13.4804	13.4624	7.27792	9.27794	10.5726	6.53739	9.3601	13.1653	7.09547	6.975	9.78401	13.0795	13.4085	13.477	9.63247	12.98	13.4452	13.4953	6.74786	6.87035	7.0256	6.81887	6.47621	6.45265	6.62789	7.00429	6.77912	6.93656	7.209	5.61995	7.43237	6.82099	8.92331	6.34762	7.13868
AW112037	98667	1435326_at	expressed sequence AW112037	5				8.19295	7.946	7.6822	8.08229	7.64026	7.44374	6.54192	6.86217	6.91561	7.6585	7.74521	7.74728	7.95876	7.64644	7.17174	7.84955	7.50536	7.22403	6.35643	5.37456	4.99824	7.57847	6.8715	6.16662	5.95707	7.49818	7.10854	7.25615	6.94267	6.99364	7.2311	7.21258	7.27561	7.12563	6.95898	7.2667	7.14336	7.53441	7.62695	7.22777	7.60639	7.1948
AW555355	99413	1444273_at	expressed sequence AW555355	25				9.19911	9.74707	9.74799	8.19331	9.35171	9.71126	9.40925	10.0618	9.58591	10.0409	9.63495	9.78662	9.08923	9.1466	8.58784	7.28317	9.94422	10.4398	9.42555	9.82487	9.45474	10.0357	9.07649	8.7556	9.33606	8.32023	6.70974	7.65453	8.39719	6.54686	6.49581	6.76299	6.91302	7.47786	8.26729	6.98674	8.84305	8.55302	9.57413	9.05834	7.51671	6.85194
Aaas	223921	1451377_a_at	achalasia, adrenocortical insufficiency, alacrimia	2	GO:0006913 (nucleocytoplasmic transport),GO:0046822 (regulation of nucleocytoplasmic transport)	GO:0005643 (nuclear pore)	GO:0003674 (molecular_function)	7.42772	6.93506	6.78288	7.4094	7.37423	7.24706	6.38992	6.2671	6.14318	7.30975	7.41739	7.23357	7.06734	6.75933	6.81193	7.44937	7.4911	7.48428	6.89351	6.18676	6.27143	7.37429	7.28689	6.90812	6.36226	7.63759	7.7346	7.86616	7.62202	7.76734	7.80531	7.87003	7.60585	7.35127	7.23658	7.71702	6.91016	7.10346	7.4467	6.88361	6.93361	7.36055
Aadacl1	320024	1455227_at	arylacetamide deacetylase-like 1	14	GO:0008152 (metabolic process)	GO:0016020 (membrane),GO:0016021 (integral to membrane)	GO:0003824 (catalytic activity),GO:0016787 (hydrolase activity)	10.9875	10.6867	10.1087	11.1784	10.8144	10.36	9.14845	8.92048	9.36187	10.8332	10.6793	10.2198	11.2477	10.913	10.3795	11.0872	10.4279	10.2618	9.45694	9.28548	9.78884	10.813	10.2568	10.4051	10.8741	10.6338	10.6656	10.7992	10.5035	10.3894	10.5658	10.4841	10.6779	10.7173	10.1894	10.6889	10.6355	10.1891	10.8303	10.1793	10.525	10.8248
Aarsd1	69684	1424006_at	alanyl-tRNA synthetase domain containing 1	2	GO:0006412 (translation),GO:0006419 (alanyl-tRNA aminoacylation)		GO:0000166 (nucleotide binding),GO:0004812 (aminoacyl-tRNA ligase activity),GO:0004813 (alanine-tRNA ligase activity),GO:0005515 (protein binding),GO:0005524 (ATP binding),GO:0016874 (ligase activity)	7.48465	7.48324	7.52529	7.3637	7.46169	7.37129	7.21676	7.13018	6.82568	7.23271	7.47178	7.39414	7.499	7.47482	7.4778	7.54686	7.63408	7.53524	7.47074	7.19721	7.20623	7.45462	7.4528	7.28163	7.06432	7.68702	7.90498	7.9444	7.88557	8.01259	7.95132	8.11867	7.81622	7.65351	7.54276	7.92516	7.30813	7.49134	7.42348	7.22361	7.22175	7.68798
Aatf	56321	1432394_a_at	apoptosis antagonizing transcription factor	4	GO:0007155 (cell adhesion),GO:0007346 (regulation of progression through mitotic cell cycle),GO:0040016 (embryonic cleavage),GO:0042254 (ribosome biogenesis and assembly),GO:0042985 (negative regulation of amyloid precursor protein biosynthetic process)	GO:0005634 (nucleus),GO:0005730 (nucleolus),GO:0005737 (cytoplasm)	GO:0005515 (protein binding)	7.60141	7.25387	7.37107	7.49213	7.39332	7.19234	6.4813	6.34428	6.50284	7.35465	7.36697	7.35282	7.42109	7.25593	6.6528	7.5391	7.35573	7.3231	6.92277	6.61935	6.28174	7.24595	6.78351	6.52656	5.5856	7.40346	7.54857	7.39475	7.29008	7.42162	7.63173	7.5283	7.21309	7.30649	6.91159	7.33278	7.2562	7.15972	6.75336	6.44121	6.65319	7.20262
Abcb10	56199	1416402_at	ATP-binding cassette, sub-family B (MDR/TAP), member 10	18	GO:0006810 (transport)	GO:0005739 (mitochondrion),GO:0005743 (mitochondrial inner membrane),GO:0016020 (membrane),GO:0016021 (integral to membrane),GO:0043190 (ATP-binding cassette (ABC) transporter complex)	GO:0000166 (nucleotide binding),GO:0005215 (transporter activity),GO:0005524 (ATP binding),GO:0016887 (ATPase activity),GO:0017111 (nucleoside-triphosphatase activity),GO:0042626 (ATPase activity, coupled to transmembrane movement of substances)	6.79607	6.63351	6.75266	6.68293	6.88991	6.88212	6.96178	6.49853	6.11354	6.55176	6.70287	6.44388	6.93973	6.76244	7.11592	6.93516	6.40862	6.45712	6.73127	6.74289	6.22843	6.62582	6.67821	7.04992	6.85189	6.53691	6.7652	6.8928	6.32252	6.68135	6.47381	6.68084	6.74077	6.87348	6.41248	6.7082	7.33554	6.77344	6.99921	6.73394	6.70505	6.73549
Abcb1b	18669	1418872_at	ATP-binding cassette, sub-family B (MDR/TAP), member 1B	18	GO:0006810 (transport)	GO:0016020 (membrane),GO:0016021 (integral to membrane),GO:0046581 (intercellular canaliculus)	GO:0000166 (nucleotide binding),GO:0005524 (ATP binding),GO:0008559 (xenobiotic-transporting ATPase activity),GO:0016787 (hydrolase activity),GO:0016887 (ATPase activity),GO:0017111 (nucleoside-triphosphatase activity),GO:0042626 (ATPase activity, coupled to transmembrane movement of substances)	9.20052	8.81143	8.54684	8.381	8.61698	8.54717	8.52791	7.74274	7.0466	8.50765	8.44769	8.32367	8.7093	8.82696	9.32407	8.74634	8.15493	8.47206	8.47188	8.05189	7.25687	8.5169	9.38587	9.24236	8.24662	8.24579	8.34913	8.53345	8.48049	8.04771	8.02501	8.26637	8.44265	8.28016	8.38838	8.59124	8.05563	8.44625	8.59509	8.59963	8.52288	8.31489
Abcb4	18670	1449818_at	ATP-binding cassette, sub-family B (MDR/TAP), member 4	1	GO:0006810 (transport),GO:0009410 (response to xenobiotic stimulus)	GO:0016020 (membrane),GO:0016021 (integral to membrane),GO:0046581 (intercellular canaliculus)	GO:0000166 (nucleotide binding),GO:0003676 (nucleic acid binding),GO:0005524 (ATP binding),GO:0008559 (xenobiotic-transporting ATPase activity),GO:0016787 (hydrolase activity),GO:0016887 (ATPase activity),GO:0017111 (nucleoside-triphosphatase activity),GO:0042626 (ATPase activity, coupled to transmembrane movement of substances)	7.68821	7.66379	7.56734	7.82111	7.55953	7.36574	6.95368	6.34311	6.41889	7.41491	7.56973	7.63053	7.98556	8.02411	7.69277	7.57905	8.37992	8.17437	7.38696	6.77759	6.32061	8.04719	7.71069	7.38849	7.09901	8.41266	7.78343	7.8463	7.85176	7.87979	8.00277	7.78925	7.87142	7.9411	7.73477	7.84792	7.78957	7.64587	7.88859	7.71469	7.68247	7.85744
Abcc1	17250	1459270_at	ATP-binding cassette, sub-family C (CFTR/MRP), member 1	11	GO:0006810 (transport),GO:0042493 (response to drug)	GO:0005624 (membrane fraction),GO:0005887 (integral to plasma membrane),GO:0016020 (membrane),GO:0016021 (integral to membrane)	GO:0000166 (nucleotide binding),GO:0005215 (transporter activity),GO:0005524 (ATP binding),GO:0016887 (ATPase activity),GO:0017111 (nucleoside-triphosphatase activity),GO:0042626 (ATPase activity, coupled to transmembrane movement of substances)	6.58356	8.23223	7.10231	6.45773	6.20764	7.24458	6.33035	6.2513	6.37487	7.10962	8.16534	8.13928	6.37411	6.50085	5.72773	6.20855	7.38794	7.8556	5.95045	5.69269	5.84669	6.82767	5.88468	5.76034	5.64904	7.04779	6.51366	6.30785	6.47499	6.56128	6.55432	6.74221	6.49517	6.29536	6.18702	6.54314	5.56479	7.1216	6.70657	7.73741	6.54049	6.387
Abcc3	76408	1428988_at	ATP-binding cassette, sub-family C (CFTR/MRP), member 3	7	GO:0006810 (transport),GO:0015722 (canalicular bile acid transport)	GO:0005887 (integral to plasma membrane),GO:0016020 (membrane),GO:0016021 (integral to membrane)	GO:0000166 (nucleotide binding),GO:0005215 (transporter activity),GO:0005524 (ATP binding),GO:0016887 (ATPase activity),GO:0017111 (nucleoside-triphosphatase activity),GO:0042626 (ATPase activity, coupled to transmembrane movement of substances)	8.4644	8.12758	8.24863	8.11887	8.47025	8.26741	7.95333	7.11492	6.34962	7.83219	8.30301	8.11446	8.35475	8.11287	8.31923	8.56906	9.28311	8.82961	8.6099	8.05177	7.46946	8.86049	8.5897	8.16151	7.90532	9.18186	8.86084	8.72144	8.67753	8.64302	9.01481	8.84667	8.54126	8.66771	8.21942	8.68442	8.87144	8.62712	8.68404	8.65808	8.65398	8.9298
Abcc4	239273	1443870_at	ATP-binding cassette, sub-family C (CFTR/MRP), member 4	23	GO:0006810 (transport),GO:0006811 (ion transport),GO:0006855 (multidrug transport)	GO:0005624 (membrane fraction),GO:0005886 (plasma membrane),GO:0016020 (membrane),GO:0016021 (integral to membrane),GO:0031088 (platelet dense granule membrane)	GO:0000166 (nucleotide binding),GO:0005254 (chloride channel activity),GO:0005524 (ATP binding),GO:0015559 (multidrug efflux pump activity),GO:0016887 (ATPase activity),GO:0017111 (nucleoside-triphosphatase activity),GO:0042626 (ATPase activity, coupled to transmembrane movement of substances)	7.46676	6.85464	6.95241	7.57427	7.1846	6.69894	6.60123	6.68755	6.5195	7.15148	7.10295	6.82564	7.25502	7.18106	6.42432	7.32867	7.72783	7.49984	7.30181	7.15273	6.71841	7.2499	6.92761	6.59936	6.10993	7.90712	7.76982	7.79454	7.43839	7.4532	7.64446	7.53875	7.45464	7.2389	7.23888	7.83411	7.26093	7.39956	7.45134	7.22831	7.27681	7.55936
Abcc5	27416	1435684_at	ATP-binding cassette, sub-family C (CFTR/MRP), member 5	9	GO:0006810 (transport)	GO:0005624 (membrane fraction),GO:0005887 (integral to plasma membrane),GO:0016020 (membrane),GO:0016021 (integral to membrane)	GO:0000166 (nucleotide binding),GO:0005524 (ATP binding),GO:0008514 (organic anion transporter activity),GO:0015239 (multidrug transporter activity),GO:0016887 (ATPase activity),GO:0017111 (nucleoside-triphosphatase activity),GO:0042626 (ATPase activity, coupled to transmembrane movement of substances)	7.43	7.60344	7.73978	7.31749	7.11827	7.37862	8.05271	8.69135	8.54673	7.10263	7.25716	7.65949	7.18431	7.35319	7.89859	7.34549	7.82802	7.92322	8.07714	8.56722	8.55051	8.0323	8.4535	8.7362	8.93297	7.96516	7.54005	7.26851	7.65005	7.43107	7.63948	7.29079	7.43728	7.402	7.20858	7.57151	7.62146	7.89848	7.71842	7.92275	7.79507	7.49974
Abce1	24015	1416014_at	ATP-binding cassette, sub-family E (OABP), member 1	23	GO:0006118 (electron transport),GO:0006457 (protein folding),GO:0006810 (transport),GO:0019069 (viral capsid assembly)	GO:0005737 (cytoplasm),GO:0005739 (mitochondrion),GO:0016020 (membrane)	GO:0000166 (nucleotide binding),GO:0005506 (iron ion binding),GO:0005524 (ATP binding),GO:0009055 (electron carrier activity),GO:0016887 (ATPase activity),GO:0017111 (nucleoside-triphosphatase activity)	8.2067	8.26203	8.45112	8.1067	8.16849	8.26318	8.05414	7.73158	7.16334	7.73143	8.14437	8.15122	8.17587	8.11216	8.17982	8.29846	9.1259	9.00231	8.05438	7.97279	7.44639	8.45814	8.24175	7.76117	6.81913	9.13376	8.40621	8.565	8.2717	8.36541	8.56401	8.56021	8.60233	8.63582	8.26852	8.29425	8.18575	8.40687	7.96998	8.06244	8.2886	7.89258
Abhd12	76192	1417669_at	abhydrolase domain containing 12	7				10.7763	10.683	10.6236	11.0663	10.9841	10.723	10.2885	10.7677	10.5805	10.8807	10.921	10.7289	11.1406	11.0835	10.7767	11.0069	11.6276	11.3466	10.9454	10.7743	10.7434	11.2963	11.0445	11.0117	11.3032	11.7358	11.3265	11.2779	11.1908	11.5012	11.4466	11.4214	11.0612	11.122	10.7124	11.1859	10.9334	10.3727	10.6393	10.5047	10.4913	11.0986
Abhd14b	76491	1451326_at	abhydrolase domain containing 14b	5		GO:0005634 (nucleus)	GO:0003824 (catalytic activity)	7.31109	7.26183	7.06382	7.62997	7.30394	7.191	6.6355	6.49456	6.47703	7.46148	7.35415	7.14964	7.347	7.35884	6.99408	7.44806	7.04746	7.12534	7.03073	6.72107	6.57564	7.34678	7.16547	6.65385	6.84605	7.2538	6.36586	6.75001	6.50958	6.15451	6.19023	6.17476	6.6221	6.51127	6.82132	6.64324	6.96682	7.23671	7.28892	7.26543	7.27461	7.44372
Abi2	329165	1433985_at	abl-interactor 2	5	GO:0001747 (),GO:0007611 (learning and/or memory),GO:0016358 (dendrite development),GO:0016477 (cell migration),GO:0043010 (camera-type eye development)	GO:0005634 (nucleus),GO:0005856 (cytoskeleton),GO:0005913 (cell-cell adherens junction),GO:0030425 (dendrite)	GO:0005515 (protein binding)	7.7564	7.6679	8.45426	7.60091	7.52989	7.61043	6.77438	5.89034	5.99165	7.09189	7.88099	8.29556	7.517	7.22504	6.84967	7.7083	7.55089	7.47854	6.2521	5.23508	5.52329	7.37807	6.70329	6.02452	5.60579	7.5779	7.65154	7.7024	7.42753	7.64786	7.59366	7.74561	7.82581	7.53709	7.47463	7.6708	7.47392	7.94012	8.14675	7.64956	7.94924	7.69139
Abi3	66610	1452928_at	ABI gene family, member 3	12	GO:0006928 (cell motility),GO:0030334 (regulation of cell migration)	GO:0005575 (cellular_component),GO:0005737 (cytoplasm)	GO:0003674 (molecular_function),GO:0005515 (protein binding)	5.80238	5.67417	5.3081	5.64613	5.9381	5.83392	5.90251	5.70662	6.25812	5.0684	5.62202	5.58458	5.50879	5.43041	5.64593	5.75805	5.86279	6.0506	5.89329	5.59323	5.97149	5.75494	5.79188	5.41915	5.86097	5.90872	6.15641	6.09675	6.16164	6.24031	5.84476	5.88923	5.92723	5.94134	5.93841	6.05137	6.64694	5.99313	5.74366	5.66914	6.06061	6.0729
Abtb2	99382	1433453_a_at	ankyrin repeat and BTB (POZ) domain containing 2	13	GO:0001558 (regulation of cell growth)		GO:0005515 (protein binding)	5.39194	6.95069	6.24125	4.33839	4.03119	7.63879	9.86183	9.99422	9.73868	4.02936	6.38391	6.76007	3.91584	5.46816	9.88811	3.98013	5.28135	8.70628	10.1671	9.89345	9.33038	6.03255	9.93335	9.91448	8.98523	5.51485	4.42793	4.71818	5.31043	4.06583	4.20578	4.47747	4.3803	3.98383	4.58076	4.11688	4.67432	7.0051	4.15521	6.70141	4.99604	3.76944
Acaa2	52538	1428145_at	acetyl-Coenzyme A acyltransferase 2 (mitochondrial 3-oxoacyl-Coenzyme A thiolase)	29	GO:0006629 (lipid metabolic process),GO:0006631 (fatty acid metabolic process),GO:0006695 (cholesterol biosynthetic process)	GO:0005739 (mitochondrion),GO:0005743 (mitochondrial inner membrane)	GO:0003988 (acetyl-CoA C-acyltransferase activity),GO:0008415 (acyltransferase activity),GO:0016740 (transferase activity)	8.44161	8.27278	8.32098	8.23599	8.34921	8.21046	8.30278	8.21671	8.23697	7.98774	8.39038	8.13679	8.45118	8.37664	8.345	8.46598	8.23729	8.21608	8.57971	8.59043	8.55461	8.49505	8.59454	8.59736	8.43624	8.25596	8.40691	8.37331	8.14915	8.41293	8.27254	8.30621	8.30812	8.22719	7.94199	8.46218	7.97931	8.03191	8.3046	8.13996	7.85663	8.55863
Acat1	110446	1424183_at	acetyl-Coenzyme A acetyltransferase 1	1		GO:0005739 (mitochondrion),GO:0005743 (mitochondrial inner membrane)	GO:0003985 (acetyl-CoA C-acetyltransferase activity),GO:0008415 (acyltransferase activity),GO:0016740 (transferase activity)	9.39805	9.28811	9.08721	9.70119	9.50249	9.41251	9.04406	8.5198	8.3711	9.22289	9.37557	9.01894	9.36739	9.24097	9.02277	9.70299	9.31669	9.19052	8.87149	8.77911	8.61217	9.13781	9.12713	8.99338	8.56913	9.28339	9.45567	9.51006	9.40928	9.54739	9.44772	9.71365	9.57434	9.62138	9.2246	9.46359	9.34015	9.01304	9.23215	8.93935	8.93586	9.42075
Acbd3	170760	1428668_at	acyl-Coenzyme A binding domain containing 3	17	GO:0006694 (steroid biosynthetic process),GO:0006810 (transport),GO:0008610 (lipid biosynthetic process)	GO:0005739 (mitochondrion),GO:0016021 (integral to membrane)	GO:0000062 (acyl-CoA binding),GO:0005488 (binding)	9.35783	9.72735	9.6511	8.89585	8.93166	9.33248	9.32513	9.32935	9.5597	9.03415	9.52078	9.5414	9.00515	9.07948	9.18561	8.94735	8.92184	9.19641	9.00305	9.39306	9.69157	8.96086	8.99043	9.20796	9.26038	8.92143	8.51345	8.72733	8.65426	8.59619	8.66158	8.44532	8.57836	8.37431	8.28187	8.5635	8.34477	8.83428	8.93063	9.01849	8.7054	8.58457
Acot2	171210	1439478_at	acyl-CoA thioesterase 2	16	GO:0006629 (lipid metabolic process),GO:0006637 (acyl-CoA metabolic process)	GO:0005739 (mitochondrion)	GO:0004759 (serine esterase activity),GO:0016290 (palmitoyl-CoA hydrolase activity),GO:0016291 (acyl-CoA thioesterase activity),GO:0016787 (hydrolase activity)	7.92752	7.49509	7.06825	7.84422	7.8372	7.49893	6.43057	6.17861	6.22596	7.80678	7.41519	7.15588	7.68004	7.49203	6.93255	7.92156	7.33876	7.20087	6.25865	5.7869	5.83404	7.27483	6.41431	6.49179	6.12697	7.44915	7.49498	7.13317	7.14661	7.34783	7.63654	7.42631	7.70041	7.61561	7.0769	7.38899	7.61491	7.54705	7.46379	7.27944	7.93713	7.85533
Acot9	56360	1418073_at	acyl-CoA thioesterase 9	15	GO:0006637 (acyl-CoA metabolic process)	GO:0005739 (mitochondrion)	GO:0003986 (acetyl-CoA hydrolase activity),GO:0004759 (serine esterase activity),GO:0005515 (protein binding),GO:0016290 (palmitoyl-CoA hydrolase activity),GO:0016291 (acyl-CoA thioesterase activity),GO:0016787 (hydrolase activity)	9.59499	9.95424	10.3868	9.30234	9.38985	10.02	10.5136	10.5541	10.4823	9.44511	9.86297	10.3999	9.35457	9.61501	10.1876	9.21556	9.19845	9.82558	10.3949	10.4465	10.3969	9.27853	10.1233	10.4637	10.1759	9.11212	9.09269	9.21494	9.40741	9.0853	8.90479	8.99735	9.10877	8.99045	9.07579	9.24405	9.25578	9.4644	9.43862	9.62979	9.12063	9.34857
Acp2	11432	1424655_at	acid phosphatase 2, lysosomal	9	GO:0001501 (skeletal development),GO:0007040 (lysosome organization and biogenesis)	GO:0005764 (lysosome),GO:0005765 (lysosomal membrane),GO:0016021 (integral to membrane)	GO:0003993 (acid phosphatase activity),GO:0016787 (hydrolase activity)	8.56596	8.75519	9.31318	8.59004	8.54899	8.62069	8.72691	9.38874	9.70228	8.3891	8.94282	9.24042	8.32617	8.37592	8.76602	8.55928	9.20757	9.28979	9.23298	9.48508	9.94119	9.41101	9.58532	9.66323	10.2816	9.23451	8.80412	8.7702	8.90423	8.87241	9.16277	9.05072	8.77882	8.7703	8.48446	8.79616	8.22786	8.75712	8.53079	8.90323	8.39091	8.97541
Acp5	11433	1431609_a_at	acid phosphatase 5, tartrate resistant	11		GO:0005615 (extracellular space),GO:0005764 (lysosome),GO:0016021 (integral to membrane)	GO:0003993 (acid phosphatase activity),GO:0005506 (iron ion binding),GO:0016787 (hydrolase activity),GO:0046872 (metal ion binding)	5.434	5.58298	6.44818	5.1641	5.32536	5.80339	6.06064	7.67759	7.99466	5.14722	5.55962	6.02161	5.4415	5.07167	5.12523	4.87995	6.68739	7.06564	7.81303	7.84146	7.59888	6.27487	6.38877	5.97848	5.98256	6.54516	5.26609	5.36386	5.57445	5.64578	5.67662	5.23454	5.16583	5.21017	5.5474	5.37524	5.49492	5.51068	5.6491	6.11894	4.83275	5.57689
Acp6	66659	1448445_at	acid phosphatase 6, lysophosphatidic	5	GO:0008150 (biological_process)	GO:0005615 (extracellular space)	GO:0003993 (acid phosphatase activity),GO:0016787 (hydrolase activity)	6.55615	6.35733	6.32807	6.81828	6.67885	6.54507	5.98693	5.50757	5.78761	6.35119	6.61181	6.25635	6.4653	6.56045	6.62078	6.80189	6.75789	6.70548	6.42551	5.82271	5.29896	6.75964	6.6055	6.1233	5.99245	6.71485	6.9547	6.89396	6.77779	6.96152	6.89772	6.70881	6.75162	6.91317	6.57804	6.64973	6.98466	6.51058	6.72532	6.50218	6.6387	6.71359
Acsl1	14081	1423883_at	acyl-CoA synthetase long-chain family member 1	9	GO:0006629 (lipid metabolic process),GO:0006631 (fatty acid metabolic process),GO:0007586 (digestion),GO:0008152 (metabolic process)	GO:0005739 (mitochondrion),GO:0005777 (peroxisome),GO:0016020 (membrane),GO:0016021 (integral to membrane)	GO:0000287 (magnesium ion binding),GO:0003824 (catalytic activity),GO:0004467 (long-chain-fatty-acid-CoA ligase activity),GO:0016874 (ligase activity)	8.90394	8.98251	9.61448	9.04269	8.55207	8.97246	9.29399	11.2038	11.1695	8.42347	8.67456	9.33001	8.52746	8.73891	9.37436	8.60373	9.92174	11.0179	11.136	11.634	11.8905	10.2751	11.2462	11.9907	12.255	9.8571	9.18566	9.23445	9.82667	8.92251	8.88472	9.03734	9.08048	9.0116	9.33673	9.1841	8.88162	9.60407	9.02518	9.97141	8.63407	9.13056
Acsl5	433256	1428082_at	acyl-CoA synthetase long-chain family member 5	11	GO:0006629 (lipid metabolic process),GO:0006631 (fatty acid metabolic process),GO:0008152 (metabolic process)	GO:0005739 (mitochondrion),GO:0005743 (mitochondrial inner membrane),GO:0005777 (peroxisome),GO:0016020 (membrane),GO:0016021 (integral to membrane)	GO:0000287 (magnesium ion binding),GO:0003824 (catalytic activity),GO:0004467 (long-chain-fatty-acid-CoA ligase activity),GO:0016874 (ligase activity)	10.2002	10.3948	10.8154	10.3731	10.1606	10.1253	10.4652	10.7475	10.9055	10.2794	10.403	10.6971	10.1312	10.207	10.0567	10.2237	10.4936	10.4247	10.5434	10.8548	10.9063	10.3005	10.2073	10.008	10.0379	10.4115	10.4237	10.4085	10.4517	10.3158	10.4569	10.4514	10.3768	10.3253	9.97936	10.4728	10.4102	10.1782	10.5134	10.3071	10.1399	10.3444
Acss1	68738	1416617_at	acyl-CoA synthetase short-chain family member 1	18	GO:0006085 (acetyl-CoA biosynthetic process),GO:0008152 (metabolic process)	GO:0005739 (mitochondrion),GO:0005759 (mitochondrial matrix)	GO:0003824 (catalytic activity),GO:0003987 (acetate-CoA ligase activity),GO:0016208 (AMP binding),GO:0016874 (ligase activity)	7.98219	7.70373	6.9128	7.87665	7.66543	7.31041	6.15588	5.95735	6.53211	8.11919	7.99783	7.40465	8.09179	7.87837	7.7261	8.03401	6.4623	6.40294	5.95852	5.975	6.66309	6.96544	6.71269	6.91472	7.35996	6.31925	6.5106	6.69261	6.32662	6.86544	6.89332	6.86293	7.03004	6.81544	6.36795	6.80842	6.15069	6.42769	7.2556	6.41433	6.40374	7.17554
Acvr1b	11479	1433725_at	activin A receptor, type 1B	12	GO:0000082 (G1/S transition of mitotic cell cycle),GO:0001701 (in utero embryonic development),GO:0001942 (hair follicle development),GO:0006468 (protein amino acid phosphorylation),GO:0006917 (induction of apoptosis),GO:0007166 (cell surface receptor linked signal transduction),GO:0007178 (transmembrane receptor protein serine/threonine kinase signaling pathway),GO:0007498 (mesoderm development)…	GO:0005615 (extracellular space),GO:0005887 (integral to plasma membrane),GO:0009986 (cell surface),GO:0016020 (membrane),GO:0016021 (integral to membrane)	GO:0000166 (nucleotide binding),GO:0000287 (magnesium ion binding),GO:0004672 (protein kinase activity),GO:0004674 (protein serine/threonine kinase activity),GO:0004675 (transmembrane receptor protein serine/threonine kinase activity),GO:0004713 (protein-tyrosine kinase activity),GO:0004872 (receptor activity),GO:0005024 (transforming growth factor beta receptor activity),GO:0005524 (ATP binding)…	8.02862	7.94284	8.49987	8.24816	7.8374	7.06951	8.13764	8.79479	8.9556	7.74681	8.09247	8.37125	8.3439	7.49474	6.76673	8.38152	8.21887	7.64311	8.38174	8.69483	9.06493	8.04134	6.96368	7.11016	8.26992	8.61811	8.21276	8.23851	7.32279	8.19393	8.13893	8.18254	8.04501	7.94592	7.50614	8.23877	7.88865	7.73755	8.08849	7.66087	8.25475	7.9471
Acvr2a	11480	1437382_at	Activin receptor IIA	24	GO:0006468 (protein amino acid phosphorylation),GO:0007178 (transmembrane receptor protein serine/threonine kinase signaling pathway),GO:0007283 (spermatogenesis),GO:0007368 (determination of left/right symmetry),GO:0007498 (mesoderm development),GO:0008584 (male gonad development),GO:0009952 (anterior/posterior pattern formation),GO:0042713 (sperm ejaculation),GO:0043084 (penile erection),GO:004…	GO:0005615 (extracellular space),GO:0005737 (cytoplasm),GO:0005887 (integral to plasma membrane),GO:0016020 (membrane),GO:0016021 (integral to membrane)	GO:0000166 (nucleotide binding),GO:0000287 (magnesium ion binding),GO:0004672 (protein kinase activity),GO:0004674 (protein serine/threonine kinase activity),GO:0004675 (transmembrane receptor protein serine/threonine kinase activity),GO:0004702 (receptor signaling protein serine/threonine kinase activity),GO:0004713 (protein-tyrosine kinase activity),GO:0004872 (receptor activity),GO:0005024 (tr…	6.38817	5.90054	5.81384	6.07709	5.56457	6.24622	6.15245	6.37813	6.05937	5.61397	5.72538	5.58399	5.92744	6.35724	6.85626	5.62987	7.28977	7.89025	7.42077	7.45629	7.21772	7.87775	7.58904	7.752	7.85726	6.72809	5.91746	6.02517	7.00403	5.75649	6.33726	6.25497	5.99243	5.95299	6.67028	5.91841	5.28018	6.208	6.24845	6.27113	6.04911	5.69753
Acvrl1	11482	1451604_a_at	activin A receptor, type II-like 1	12	GO:0001525 (angiogenesis),GO:0006468 (protein amino acid phosphorylation),GO:0007179 (transforming growth factor beta receptor signaling pathway)	GO:0005615 (extracellular space),GO:0009986 (cell surface),GO:0016020 (membrane),GO:0016021 (integral to membrane)	GO:0000166 (nucleotide binding),GO:0000287 (magnesium ion binding),GO:0004672 (protein kinase activity),GO:0004674 (protein serine/threonine kinase activity),GO:0004675 (transmembrane receptor protein serine/threonine kinase activity),GO:0004713 (protein-tyrosine kinase activity),GO:0004872 (receptor activity),GO:0005024 (transforming growth factor beta receptor activity),GO:0005515 (protein bind…	6.63741	6.6312	6.80313	6.489	6.83191	6.62443	6.27341	7.25464	7.73402	6.07482	6.67075	6.89023	6.9116	6.66424	6.62249	6.78634	7.50326	7.41192	7.2264	7.50197	8.21182	7.72045	7.34637	7.23622	7.87139	7.5307	7.20026	7.34589	7.13472	7.40536	7.5911	7.45108	7.08399	7.13724	6.97274	7.23732	6.88157	6.55333	6.48864	6.43327	6.46031	7.33079
Adamts4	240913	1452595_at	a disintegrin-like and metallopeptidase (reprolysin type) with thrombospondin type 1 motif, 4	21	GO:0001501 (skeletal development),GO:0006508 (proteolysis),GO:0007229 (integrin-mediated signaling pathway)	GO:0005578 (proteinaceous extracellular matrix),GO:0031012 (extracellular matrix)	GO:0004222 (metalloendopeptidase activity),GO:0008233 (peptidase activity),GO:0008237 (metallopeptidase activity),GO:0008270 (zinc ion binding),GO:0016787 (hydrolase activity),GO:0046872 (metal ion binding)	4.00838	5.33475	6.42029	3.97609	3.82005	5.09945	7.79176	5.76661	4.97573	3.94685	5.19236	5.7293	4.2294	4.27934	5.07998	3.79033	3.94144	6.66494	7.39471	6.22188	4.65618	3.9344	4.11692	4.21088	4.04116	3.79214	3.91311	3.86043	4.02051	3.94462	3.94657	3.80833	3.8809	4.02914	3.9364	3.96567	3.97058	4.33878	3.77114	5.32031	3.7885	4.0275
Adcy7	11513	1420970_at	adenylate cyclase 7	10	GO:0006171 (cAMP biosynthetic process),GO:0007190 (adenylate cyclase activation),GO:0007242 (intracellular signaling cascade),GO:0009190 (cyclic nucleotide biosynthetic process)	GO:0005886 (plasma membrane),GO:0016020 (membrane),GO:0016021 (integral to membrane)	GO:0000287 (magnesium ion binding),GO:0004016 (adenylate cyclase activity),GO:0016829 (lyase activity),GO:0016849 (phosphorus-oxygen lyase activity),GO:0046872 (metal ion binding)	8.2717	7.85784	7.62627	8.32186	8.42653	8.28672	7.45796	6.93584	6.81947	7.93481	8.12121	7.14457	8.60769	8.37227	7.7953	8.5467	8.2415	8.16149	7.09339	6.71274	6.59324	8.2279	7.6585	6.91077	7.20011	8.45016	8.50938	8.62142	8.43191	8.0774	8.63615	8.30824	8.31853	8.52944	8.1717	8.63641	8.79941	8.25504	8.84464	8.51734	8.53226	8.85539
Add3	27360	1423298_at	adducin 3 (gamma)	2		GO:0005856 (cytoskeleton),GO:0016020 (membrane)	GO:0005198 (structural molecule activity),GO:0005200 (structural constituent of cytoskeleton),GO:0005516 (calmodulin binding),GO:0046872 (metal ion binding)	7.7012	7.54223	7.05055	8.0511	7.68995	7.54621	6.6157	5.78563	5.30551	7.43067	7.47196	6.88483	7.84246	7.59412	7.09941	7.72989	8.43435	8.30434	6.97491	5.81388	5.50427	7.81722	7.24115	5.79826	5.06678	8.2835	8.4982	8.69252	8.4755	8.21822	8.58471	8.64232	8.53999	8.59878	8.31402	8.74089	8.68162	8.32727	8.91728	8.16716	8.49207	8.3551
Adk	11534	1416319_at	adenosine kinase	5	GO:0006166 (purine ribonucleoside salvage),GO:0009156 (ribonucleoside monophosphate biosynthetic process)	GO:0005634 (nucleus)	GO:0000287 (magnesium ion binding),GO:0004001 (adenosine kinase activity),GO:0016301 (kinase activity),GO:0016740 (transferase activity),GO:0046872 (metal ion binding)	8.37557	8.07859	8.01012	7.97252	8.1448	8.02406	7.76331	7.12174	7.09189	7.72466	8.00373	7.67433	8.21874	8.35564	8.1095	8.19629	7.43907	7.63704	7.51097	7.45697	7.32464	7.77718	7.81544	7.64232	7.07167	7.40257	7.95224	7.96899	7.85804	8.03971	7.84349	7.86159	7.98684	7.96495	7.78247	7.91008	7.7439	8.27583	8.27536	7.99671	8.05593	8.18938
Adm	11535	1416077_at	adrenomedullin	11	GO:0006171 (cAMP biosynthetic process),GO:0006701 (progesterone biosynthetic process),GO:0007165 (signal transduction),GO:0007267 (cell-cell signaling),GO:0007507 (heart development),GO:0007565 (pregnancy),GO:0007588 (excretion),GO:0008015 (circulation),GO:0008284 (positive regulation of cell proliferation),GO:0009611 (response to wounding)	GO:0005576 (extracellular region),GO:0005615 (extracellular space),GO:0005625 (soluble fraction)	GO:0005179 (hormone activity)	6.43526	6.81706	6.28563	3.57518	4.55431	6.34813	6.04649	4.42084	4.20988	4.29557	5.76731	5.39331	3.98209	5.2717	3.76751	3.3493	4.6224	7.2166	5.3936	3.88463	4.02801	4.66435	3.94382	3.73506	3.48127	3.7007	3.75785	3.3842	3.92013	3.55277	3.3809	3.81177	3.50882	3.90876	3.96602	3.621	3.80038	3.66271	3.99487	4.79071	3.47984	3.48213
Adora2b	11541	1450214_at	adenosine A2b receptor	21	GO:0000187 (activation of MAPK activity),GO:0006968 (cellular defense response),GO:0007165 (signal transduction),GO:0007186 (G-protein coupled receptor protein signaling pathway),GO:0007190 (adenylate cyclase activation),GO:0007254 (JNK cascade),GO:0007588 (excretion)	GO:0005615 (extracellular space),GO:0005887 (integral to plasma membrane),GO:0016020 (membrane),GO:0016021 (integral to membrane)	GO:0001584 (rhodopsin-like receptor activity),GO:0001609 (adenosine receptor activity, G-protein coupled),GO:0001612 (A2B adenosine receptor activity, G-protein coupled),GO:0004871 (signal transducer activity),GO:0004872 (receptor activity),GO:0004930 (G-protein coupled receptor activity)	6.21286	7.18147	6.57488	4.75461	4.97888	6.2146	5.68092	7.95651	8.708	5.56438	6.62855	5.78596	5.07261	5.3846	4.1958	4.58568	6.42085	8.00829	6.26025	8.71837	9.39012	7.05059	5.09888	5.74603	6.49734	5.79377	4.91615	5.02814	5.77013	5.29532	5.26066	5.2369	4.80963	5.13492	4.72349	5.11906	4.99976	5.94531	5.37087	6.50087	5.06903	5.00302
Adss	11566	1460726_at	adenylosuccinate synthetase, non muscle	1	GO:0006164 (purine nucleotide biosynthetic process),GO:0006167 (AMP biosynthetic process)		GO:0000166 (nucleotide binding),GO:0000287 (magnesium ion binding),GO:0004019 (adenylosuccinate synthase activity),GO:0005525 (GTP binding),GO:0016874 (ligase activity),GO:0046872 (metal ion binding)	9.85821	9.71965	9.44809	9.48109	9.90058	9.94777	9.24888	8.10651	7.93868	9.67826	9.77863	9.16519	9.78584	9.79063	9.29566	9.81191	10.1592	10.3116	9.52426	8.65929	7.94536	9.49673	9.32979	8.18911	7.51872	10.0436	10.3342	10.316	10.5403	10.1754	10.2159	10.2971	10.1237	10.2064	10.1408	10.1357	10.0932	10.1592	9.95904	9.87328	9.80443	9.91178
Adssl1	11565	1449383_at	adenylosuccinate synthetase like 1	7	GO:0006163 (purine nucleotide metabolic process),GO:0006164 (purine nucleotide biosynthetic process)		GO:0000166 (nucleotide binding),GO:0000287 (magnesium ion binding),GO:0004019 (adenylosuccinate synthase activity),GO:0005515 (protein binding),GO:0005525 (GTP binding),GO:0016874 (ligase activity),GO:0046872 (metal ion binding)	8.23563	7.98337	7.89161	8.49066	8.25001	8.14912	7.505	7.77647	7.25164	8.14295	8.11982	7.90357	8.24486	8.25174	8.21436	8.36831	9.88731	9.49712	8.49724	8.13658	7.9159	8.93032	8.77187	8.46621	7.98917	9.98632	9.41512	9.45259	9.09765	9.34367	9.15462	9.30013	9.28963	9.34124	8.81422	9.2876	8.80092	8.74258	9.17699	8.84768	8.84635	9.03854
Aebp2	11569	1434080_at	AE binding protein 2	24	GO:0006355 (regulation of transcription, DNA-dependent)	GO:0005622 (intracellular),GO:0005634 (nucleus)	GO:0003676 (nucleic acid binding),GO:0003677 (DNA binding),GO:0003714 (transcription corepressor activity),GO:0008270 (zinc ion binding),GO:0046872 (metal ion binding)	9.80635	10.246	10.3583	9.01057	9.12269	10.1663	10.4671	9.74335	9.53651	9.5452	9.98516	10.1732	9.01258	9.88953	10.7166	8.74592	9.54638	10.5572	10.8926	10.0711	9.58971	9.94781	10.5149	10.1093	9.758	9.27919	8.77394	8.96521	9.36202	8.80017	8.83199	8.96598	8.84788	8.84941	8.92188	8.93538	9.06001	9.90998	9.41062	10.0513	8.91788	8.54099
Aff1	17355	1444937_at	AF4/FMR2 family, member 1	9	GO:0006350 (transcription)	GO:0005634 (nucleus)	GO:0003700 (transcription factor activity),GO:0016301 (kinase activity)	4.79863	5.72334	6.15556	4.43603	4.34645	6.1457	7.02563	8.22445	8.13377	6.18055	5.89282	6.45044	4.43754	6.82276	6.9032	4.66736	4.08491	5.36403	5.48954	5.70202	5.86275	4.71252	6.16722	5.04319	5.35181	4.51443	4.60459	4.45524	4.14493	4.50003	4.53874	4.3744	4.76027	4.5681	4.31763	4.4626	4.66066	5.03067	4.20878	5.19829	4.76853	4.61812
Aftph	216549	1426862_at	aftiphilin	6	GO:0006810 (transport),GO:0015031 (protein transport)	GO:0005829 (cytosol),GO:0030121 (AP-1 adaptor complex)	GO:0030276 (clathrin binding)	8.74693	8.62138	8.7528	8.57723	8.50009	9.15493	10.4783	10.8932	10.7124	8.56524	8.66143	8.63491	8.4399	9.03456	10.3034	8.43893	8.63892	8.93237	10.6113	10.8512	10.9839	9.05278	10.7446	11.0448	11.1682	8.61455	8.48854	8.24932	8.43785	8.62795	8.79871	8.61806	8.43608	8.39005	8.27534	8.51927	7.18338	7.63727	8.02203	7.89318	7.13449	8.50257
Agpat2	67512	1428821_at	1-acylglycerol-3-phosphate O-acyltransferase 2 (lysophosphatidic acid acyltransferase, beta)	20	GO:0006654 (phosphatidic acid biosynthetic process),GO:0008152 (metabolic process),GO:0008654 (phospholipid biosynthetic process)	GO:0005783 (endoplasmic reticulum),GO:0016020 (membrane),GO:0016021 (integral to membrane)	GO:0003841 (1-acylglycerol-3-phosphate O-acyltransferase activity),GO:0008415 (acyltransferase activity),GO:0016740 (transferase activity)	7.95407	8.01106	7.99363	8.00919	7.97792	7.73211	7.35052	8.02814	8.02161	7.98312	8.19558	7.97284	8.19813	8.03474	7.35621	8.13282	7.82932	7.75191	7.41363	7.78873	7.99554	7.89034	7.7146	7.51231	7.60228	8.13797	7.68661	7.82228	7.28693	7.6934	7.62892	7.62017	7.48741	7.63978	7.22058	7.67135	7.32037	6.84526	7.08328	6.99748	6.74035	7.70046
Agpat5	52123	1434287_at	1-acylglycerol-3-phosphate O-acyltransferase 5 (lysophosphatidic acid acyltransferase, epsilon)	23	GO:0008152 (metabolic process),GO:0008654 (phospholipid biosynthetic process)	GO:0005739 (mitochondrion),GO:0016020 (membrane),GO:0016021 (integral to membrane)	GO:0003841 (1-acylglycerol-3-phosphate O-acyltransferase activity),GO:0008415 (acyltransferase activity),GO:0016740 (transferase activity)	6.70384	6.52084	6.50206	6.8158	6.49904	6.38336	5.92145	5.38084	5.72976	6.57862	6.6231	6.52696	6.72301	6.76904	6.32411	6.7385	7.4636	7.16518	6.22282	5.74249	5.79184	6.69465	6.12247	5.98472	5.73461	7.38568	6.83142	6.86517	7.02066	7.02385	6.93523	6.87453	6.85562	6.84864	6.4945	6.8581	7.00605	7.37116	6.95372	6.83247	7.11527	6.61673
Agtrap	11610	1422965_at	angiotensin II, type I receptor-associated protein	9	GO:0008217 (blood pressure regulation)	GO:0005783 (endoplasmic reticulum),GO:0005886 (plasma membrane),GO:0005938 (cell cortex),GO:0016020 (membrane),GO:0016021 (integral to membrane)	GO:0004872 (receptor activity),GO:0004945 (angiotensin type II receptor activity),GO:0005515 (protein binding)	6.8234	6.88752	7.43098	6.75784	6.84622	6.94569	7.89146	8.75365	8.67587	6.63911	7.20131	7.27425	6.65532	6.67397	7.12194	6.9307	6.60618	6.826	7.9912	8.44661	8.63557	6.85736	7.37437	7.49284	7.61104	6.67888	6.96468	6.80308	6.8909	6.86428	6.89676	6.73636	6.73615	6.63743	6.52387	6.83711	6.47805	6.82986	6.51131	6.74523	6.82625	7.03496
Ahcy	269378	1417125_at	S-adenosylhomocysteine hydrolase	4	GO:0006730 (one-carbon compound metabolic process),GO:0019510 (S-adenosylhomocysteine catabolic process)	GO:0005829 (cytosol)	GO:0004013 (adenosylhomocysteinase activity),GO:0005507 (copper ion binding),GO:0005515 (protein binding),GO:0016787 (hydrolase activity),GO:0043621 (protein self-association)	8.60975	8.64667	8.64507	8.8339	8.57134	8.36903	8.21712	8.42043	8.32344	8.54978	8.60281	8.70527	8.64091	8.57726	8.41429	8.64019	9.18857	9.08441	8.77965	8.64447	8.39343	8.8425	8.80159	8.73826	8.32069	9.27581	9.13079	9.14997	9.10537	9.25532	9.29862	9.25194	9.05646	9.04472	8.64915	9.08842	8.94431	8.87061	9.09182	8.75789	8.9033	8.81382
Ahr	11622	1422631_at	aryl-hydrocarbon receptor	11	GO:0000160 (two-component signal transduction system (phosphorelay)),GO:0006350 (transcription),GO:0006355 (regulation of transcription, DNA-dependent),GO:0006366 (transcription from RNA polymerase II promoter),GO:0006805 (xenobiotic metabolic process),GO:0006915 (apoptosis),GO:0006950 (response to stress),GO:0007049 (cell cycle),GO:0007165 (signal transduction),GO:0009410 (response to xenobiotic…	GO:0005634 (nucleus),GO:0005667 (transcription factor complex),GO:0005737 (cytoplasm)	GO:0000155 (two-component sensor activity),GO:0003677 (DNA binding),GO:0003700 (transcription factor activity),GO:0004871 (signal transducer activity),GO:0004872 (receptor activity),GO:0004879 (ligand-dependent nuclear receptor activity),GO:0005515 (protein binding),GO:0030528 (transcription regulator activity)	4.27937	5.01773	6.21675	3.672	3.82636	5.78419	5.36439	5.53246	5.73452	3.61645	5.22387	6.2414	3.94789	5.13408	4.6696	3.87865	5.41131	7.95597	6.49318	5.42009	5.07343	5.44403	4.40404	3.97275	3.49657	4.7319	5.01381	5.27279	6.24592	5.46226	5.2874	5.24676	5.11128	5.001	5.44966	5.35659	5.33814	6.98068	5.57932	6.74873	4.9987	5.40056
Ak3l1	11639	1421830_at	adenylate kinase 3 alpha-like 1	11	GO:0006139 (nucleobase, nucleoside, nucleotide and nucleic acid metabolic process)	GO:0005739 (mitochondrion)	GO:0000166 (nucleotide binding),GO:0004017 (adenylate kinase activity),GO:0005524 (ATP binding),GO:0005525 (GTP binding),GO:0016301 (kinase activity),GO:0016740 (transferase activity),GO:0016776 (phosphotransferase activity, phosphate group as acceptor),GO:0019201 (nucleotide kinase activity)	3.73606	3.90311	3.92103	3.82067	3.45419	3.64079	4.30556	4.09437	3.96578	3.90925	3.73602	4.50714	3.52501	3.83505	4.2604	3.37059	4.37587	4.6059	4.5776	4.86958	4.47877	3.66892	3.68459	4.40303	4.2401	4.61763	3.74836	3.81545	3.6963	3.82405	3.71723	3.77411	3.80096	3.77134	3.48769	3.62467	3.9277	4.13439	3.86036	3.87094	3.84134	3.60018
Akap11	219181	1434764_at	A kinase (PRKA) anchor protein 11	5	GO:0008150 (biological_process)	GO:0005777 (peroxisome)	GO:0016301 (kinase activity),GO:0019207 (kinase regulator activity)	8.20079	7.74393	7.62512	8.51489	8.03209	7.69862	6.82223	6.20906	6.52256	8.0611	7.98227	7.63394	8.22297	7.89421	7.16315	8.21585	8.31482	8.19409	6.88892	6.80971	6.37621	8.17021	7.5131	7.02738	6.69659	8.47088	8.03758	8.13675	8.02252	7.96733	8.22982	8.13248	8.00749	8.1745	7.49256	8.1206	8.6241	8.45889	8.54889	8.02268	8.618	8.09372
Akap12	83397	1419706_a_at	A kinase (PRKA) anchor protein (gravin) 12	8	GO:0006605 (protein targeting),GO:0007165 (signal transduction)	GO:0005575 (cellular_component)	GO:0005515 (protein binding),GO:0008565 (protein transporter activity),GO:0016301 (kinase activity),GO:0030159 (receptor signaling complex scaffold activity)	5.14597	4.6727	4.48605	4.72023	4.58823	4.67657	5.94626	6.26756	6.11566	4.80059	4.61497	4.24588	4.60025	5.04185	6.07283	4.83753	4.25128	4.02847	4.51618	5.64109	5.98353	4.18373	5.25256	6.22115	6.28769	3.96558	4.55931	4.47987	4.28101	4.11092	4.54182	4.3744	4.43236	4.67492	4.41462	4.17997	4.9537	4.89785	4.74277	4.3253	4.45754	4.57663
Akap13	75547	1440977_at	A kinase (PRKA) anchor protein 13	26	GO:0007242 (intracellular signaling cascade),GO:0035023 (regulation of Rho protein signal transduction)	GO:0005622 (intracellular)	GO:0005089 (Rho guanyl-nucleotide exchange factor activity),GO:0008270 (zinc ion binding),GO:0016301 (kinase activity),GO:0019992 (diacylglycerol binding),GO:0046872 (metal ion binding)	6.01313	6.68754	6.31687	5.60229	5.72992	6.83265	5.75057	5.52638	6.01742	6.38825	6.06519	5.95133	5.6277	7.30813	5.61079	5.08321	6.0805	7.78976	5.38582	5.83296	5.51822	6.25227	6.0953	5.68219	5.10546	5.40533	4.74497	5.13261	5.6669	5.01106	4.64717	4.91819	5.04136	4.94152	5.89422	4.84207	5.199	6.15375	6.03318	6.06656	5.74219	4.73561
Akr1b8	14187	1448894_at	aldo-keto reductase family 1, member B8	2			GO:0004032 (aldehyde reductase activity),GO:0016491 (oxidoreductase activity)	9.22817	9.03787	8.9236	9.32876	9.20068	9.11865	8.49965	8.55256	8.49373	8.90395	9.10244	9.0034	9.35746	9.28624	8.8575	9.3742	9.90075	9.76285	9.38463	8.99656	8.68314	9.72113	9.58579	9.04768	8.75742	9.92521	10.5493	10.4309	10.2429	10.2806	10.2812	10.3841	10.1801	10.0627	9.76001	10.3737	9.53572	9.14611	9.35234	9.10978	9.19854	10.0979
Akr7a5	110198	1417294_at	aldo-keto reductase family 7, member A5 (aflatoxin aldehyde reductase)	7	GO:0005975 (carbohydrate metabolic process),GO:0006081 (aldehyde metabolic process)	GO:0005739 (mitochondrion)	GO:0004032 (aldehyde reductase activity),GO:0004033 (aldo-keto reductase activity),GO:0009055 (electron carrier activity),GO:0016491 (oxidoreductase activity)	7.62854	7.58901	7.40423	7.38255	7.5239	7.37689	6.95972	6.72161	6.46258	7.41785	7.57101	7.61451	7.55741	7.56396	7.4966	7.55966	7.69854	7.52748	7.45166	7.15038	6.91561	7.62501	7.65233	7.38877	7.06858	7.65147	7.67272	7.638	7.49969	7.95189	7.89573	7.8438	7.44077	7.55181	7.41804	7.56576	7.65844	7.48119	7.43901	7.40162	7.27619	7.6087
Akt1	11651	1425711_a_at	thymoma viral proto-oncogene 1	2	GO:0000060 (protein import into nucleus, translocation),GO:0005975 (carbohydrate metabolic process),GO:0005977 (glycogen metabolic process),GO:0005978 (glycogen biosynthetic process),GO:0006006 (glucose metabolic process),GO:0006417 (regulation of translation),GO:0006445 (),GO:0006468 (protein amino acid phosphorylation),GO:0006809 (nitric oxide biosynthetic process),GO:0006810 (transport),GO:000…	GO:0005634 (nucleus),GO:0005737 (cytoplasm),GO:0005819 (spindle),GO:0030027 (lamellipodium)	GO:0000166 (nucleotide binding),GO:0004672 (protein kinase activity),GO:0004674 (protein serine/threonine kinase activity),GO:0004702 (receptor signaling protein serine/threonine kinase activity),GO:0004713 (protein-tyrosine kinase activity),GO:0005351 (sugar porter activity),GO:0005515 (protein binding),GO:0005524 (ATP binding),GO:0016301 (kinase activity),GO:0016740 (transferase activity),GO:00…	7.82235	8.22195	8.27578	8.04437	8.35737	8.13089	8.00737	7.41451	7.36846	8.52473	8.94243	8.07244	8.55023	8.28125	7.98639	8.63262	8.28982	7.94594	6.97492	6.8117	7.13319	7.5987	7.53901	6.70602	7.22151	8.68608	8.61507	8.64491	8.35624	8.60381	8.78132	8.61814	8.01228	8.01244	7.40048	8.53871	8.50895	7.87314	7.76532	8.02449	7.9223	8.71105
Akt3	23797	1460307_at	thymoma viral proto-oncogene 3	8	GO:0006468 (protein amino acid phosphorylation),GO:0007165 (signal transduction)		GO:0000166 (nucleotide binding),GO:0004672 (protein kinase activity),GO:0004674 (protein serine/threonine kinase activity),GO:0005515 (protein binding),GO:0005524 (ATP binding),GO:0016301 (kinase activity),GO:0016740 (transferase activity)	4.77453	4.68489	4.81202	4.57785	5.11609	5.13373	6.44066	6.9924	7.2099	4.82978	4.55058	4.75996	5.01631	4.64485	5.46916	5.10472	4.9149	5.11782	6.29159	7.28498	7.64034	4.63228	5.8906	7.09372	7.2816	4.92407	5.64129	5.18762	5.36578	5.51019	5.37173	5.36695	5.22098	5.10487	4.77079	5.13434	4.92406	5.20929	5.25962	5.18568	5.28065	5.20035
Alad	17025	1424877_a_at	aminolevulinate, delta-, dehydratase	2	GO:0006779 (porphyrin biosynthetic process),GO:0006783 (heme biosynthetic process),GO:0008152 (metabolic process)		GO:0003824 (catalytic activity),GO:0004655 (porphobilinogen synthase activity),GO:0008270 (zinc ion binding),GO:0016829 (lyase activity),GO:0042802 (identical protein binding),GO:0046872 (metal ion binding)	6.65251	6.2381	6.22898	6.62911	6.50632	6.3823	5.67388	5.62025	5.1445	6.39178	6.37638	6.51397	6.5209	6.49168	6.27577	6.68323	7.19736	6.99383	6.4298	5.79246	5.71915	6.88165	6.82977	5.95499	5.69506	7.4321	7.03023	7.10723	6.85171	7.18859	7.27042	7.10176	6.88694	6.9233	6.68576	6.86492	6.53745	6.28032	6.36845	6.2611	6.3765	6.41919
Alas1	11655	1424126_at	aminolevulinic acid synthase 1	11	GO:0006783 (heme biosynthetic process),GO:0008152 (metabolic process),GO:0009058 (biosynthetic process)	GO:0005739 (mitochondrion)	GO:0003870 (5-aminolevulinate synthase activity),GO:0008415 (acyltransferase activity),GO:0008483 (transaminase activity),GO:0016740 (transferase activity),GO:0016769 (transferase activity, transferring nitrogenous groups)	8.56113	8.99631	9.6315	8.34991	8.26068	8.52854	8.50832	9.61664	9.72314	8.74869	9.61132	9.94703	8.91832	8.91168	8.59548	8.33977	8.49332	8.81724	9.18625	9.36603	9.43424	8.55343	8.66583	9.01355	9.2902	8.53138	7.87346	8.08563	7.79491	7.42005	7.48664	7.67166	7.83194	7.98398	7.22523	7.97067	8.3002	8.68906	8.672	9.11222	7.68522	8.60083
Alcam	11658	1437466_at	activated leukocyte cell adhesion molecule	20	GO:0007155 (cell adhesion),GO:0007411 (axon guidance),GO:0008045 (motor axon guidance)	GO:0009897 (external side of plasma membrane),GO:0016020 (membrane),GO:0016021 (integral to membrane),GO:0030424 (axon),GO:0043025 (cell soma)	GO:0005515 (protein binding)	10.0897	9.92148	9.85509	9.92239	9.72155	9.74093	9.54908	9.30998	9.21068	9.93406	9.88528	9.94061	10.1732	10.0824	10.0252	9.88871	10.0004	10.196	10.3739	10.0851	9.76539	10.1111	9.73281	9.61759	9.06746	10.0599	9.85476	9.8085	9.77764	9.65535	9.71422	9.70503	9.74174	9.72539	9.33268	9.82912	9.20057	9.1347	9.64235	9.5445	9.07225	9.55125
Aldh1b1	72535	1451260_at	aldehyde dehydrogenase 1 family, member B1	6	GO:0005975 (carbohydrate metabolic process),GO:0008152 (metabolic process),GO:0009231 (riboflavin biosynthetic process)	GO:0005615 (extracellular space),GO:0005739 (mitochondrion)	GO:0004028 (3-chloroallyl aldehyde dehydrogenase activity),GO:0004029 (aldehyde dehydrogenase (NAD) activity),GO:0008531 (riboflavin kinase activity),GO:0016491 (oxidoreductase activity)	5.10161	4.71669	5.24907	4.75225	4.98559	5.04741	7.91446	9.45922	9.64098	4.93168	5.45171	5.28202	5.16831	5.16862	7.24736	5.03055	5.46923	5.79174	7.97654	9.53552	9.87962	5.90634	7.83749	8.73091	9.13995	5.64505	5.20653	5.31577	5.09985	5.56679	5.50044	5.0458	5.33568	5.46937	5.25557	5.31909	5.35948	5.56977	5.61937	5.30004	5.13946	5.51949
Aldh1l2	216188	1436119_at	aldehyde dehydrogenase 1 family, member L2	22	GO:0006412 (translation),GO:0006730 (one-carbon compound metabolic process),GO:0008152 (metabolic process),GO:0009058 (biosynthetic process),GO:0009258 (10-formyltetrahydrofolate catabolic process)	GO:0005737 (cytoplasm)	GO:0008168 (methyltransferase activity),GO:0016155 (formyltetrahydrofolate dehydrogenase activity),GO:0016491 (oxidoreductase activity),GO:0016742 (hydroxymethyl-, formyl- and related transferase activity),GO:0048037 (cofactor binding)	6.27323	5.83496	5.96028	6.12137	5.60093	5.53579	5.40304	4.49348	4.46164	5.78131	6.10129	6.15168	5.39795	5.26706	5.44207	5.93292	4.62344	4.39911	4.5155	4.62716	4.37186	4.29195	4.48444	4.3045	4.59209	4.30211	4.76092	4.70248	4.97625	4.54419	4.23383	4.33385	4.7169	4.65275	4.42297	4.72262	4.42457	4.83138	4.95105	4.62517	5.18086	4.77178
Aldh3b1	67689	1452301_at	aldehyde dehydrogenase 3 family, member B1	10	GO:0006081 (aldehyde metabolic process),GO:0008152 (metabolic process)		GO:0004030 (aldehyde dehydrogenase [NAD(P)+] activity),GO:0016491 (oxidoreductase activity)	7.88255	7.99332	8.14139	7.9737	7.88078	7.80441	7.58452	7.8746	8.00744	8.01898	8.05688	8.02071	7.804	7.60526	7.81353	7.95574	8.52633	8.55587	8.53733	8.12309	8.0076	8.57888	8.47954	8.21995	8.15926	8.61344	8.61816	8.65608	8.51821	8.69771	8.76939	8.87418	8.44728	8.47649	7.96465	8.63325	8.61026	8.3933	8.20748	7.9978	8.29716	8.55595
Aldh9a1	56752	1436689_a_at	aldehyde dehydrogenase 9, subfamily A1	18	GO:0006081 (aldehyde metabolic process),GO:0006118 (electron transport),GO:0008152 (metabolic process),GO:0009437 (carnitine metabolic process),GO:0042136 (neurotransmitter biosynthetic process),GO:0042445 (hormone metabolic process)	GO:0005737 (cytoplasm),GO:0005829 (cytosol)	GO:0004028 (3-chloroallyl aldehyde dehydrogenase activity),GO:0004029 (aldehyde dehydrogenase (NAD) activity),GO:0009055 (electron carrier activity),GO:0016491 (oxidoreductase activity),GO:0016620 (oxidoreductase activity, acting on the aldehyde or oxo group of donors, NAD or NADP as acceptor),GO:0019145 (aminobutyraldehyde dehydrogenase activity),GO:0047105 (4-trimethylammoniobutyraldehyde dehyd…	11.3095	10.9958	10.7889	11.0889	11.2971	11.0734	10.4263	9.71751	9.43745	11.2773	11.2347	11.0718	11.287	11.2432	10.8073	11.5097	10.7511	10.8052	10.5521	10.0754	9.73855	11.0465	10.7275	10.6265	10.1233	10.9336	11.3311	11.2373	11.0266	11.2158	11.2687	11.1272	11.2747	11.126	10.7603	11.382	10.8776	10.9515	11.258	10.6945	10.9986	11.2894
Alg10b	380959	1454917_at	asparagine-linked glycosylation 10 homolog B (yeast, alpha-1,2-glucosyltransferase)	2			GO:0005216 (ion channel activity)	7.6103	7.06569	7.07403	7.74387	7.36638	7.14973	6.15137	5.30852	5.53556	7.05595	7.1102	6.95149	7.51996	7.15318	6.83789	7.79767	8.10929	7.69681	6.4502	6.02985	5.51724	7.42954	6.92156	6.38133	6.36332	8.36247	7.80012	7.85244	7.50995	7.67795	8.07978	8.07547	7.93436	7.76179	7.46238	7.73879	7.25945	7.26438	7.89952	7.23941	7.87836	7.58232
Alg9	102580	1418844_at	asparagine-linked glycosylation 9 homolog (yeast, alpha 1,2 mannosyltransferase)	11		GO:0005783 (endoplasmic reticulum),GO:0016020 (membrane),GO:0016021 (integral to membrane)	GO:0016740 (transferase activity),GO:0016757 (transferase activity, transferring glycosyl groups)	7.64289	7.66421	8.08596	7.78755	7.42868	7.46651	7.38492	7.32774	7.46343	7.39071	7.72183	7.93716	7.47513	7.58432	7.54875	7.50253	7.84057	8.04856	7.81107	7.86488	7.76888	7.78202	7.79631	7.88566	7.84668	7.91011	7.34055	7.4888	7.3387	7.61233	7.54587	7.52132	7.34931	7.17041	7.01799	7.47151	7.791	7.93881	7.75375	7.725	7.71762	7.56834
Alox5ap	11690	1452016_at	arachidonate 5-lipoxygenase activating protein	7	GO:0006691 (leukotriene metabolic process),GO:0006954 (inflammatory response),GO:0019370 (leukotriene biosynthetic process)	GO:0005615 (extracellular space),GO:0005624 (membrane fraction),GO:0016020 (membrane),GO:0016021 (integral to membrane)	GO:0005488 (binding),GO:0008047 (enzyme activator activity)	12.3444	12.1971	11.9389	12.5312	12.3538	12.2336	11.786	11.6426	11.4999	12.2093	12.188	11.9976	12.3947	12.3641	12.0156	12.46	12.5143	12.4473	12.3493	11.9603	11.8094	12.618	12.4238	12.0937	11.993	12.539	12.7482	12.7032	12.757	12.7278	12.798	12.6127	12.6935	12.6807	12.4084	12.7528	12.5206	12.2309	12.4454	12.306	12.4372	12.6499
Ampd3	11717	1422573_at	AMP deaminase 3	26	GO:0006196 (AMP catabolic process),GO:0009117 (nucleotide metabolic process),GO:0009168 (purine ribonucleoside monophosphate biosynthetic process)		GO:0003876 (AMP deaminase activity),GO:0016787 (hydrolase activity),GO:0019239 (deaminase activity)	10.301	10.6022	10.7351	9.23771	9.92371	10.7012	9.94243	8.35914	8.53904	9.63806	10.3361	10.6345	9.22229	9.9497	9.43077	9.24238	9.29875	10.2828	9.5285	7.62061	6.94053	10.0313	9.21336	6.72884	6.73377	8.61791	8.58013	8.84853	9.60938	8.74949	8.76657	8.95049	8.642	8.63031	9.16258	8.7963	8.38597	9.03734	9.16307	9.95616	7.56827	8.41982
Anapc5	59008	1416906_at	anaphase-promoting complex subunit 5	7	GO:0000074 (regulation of progression through cell cycle),GO:0000086 (G2/M transition of mitotic cell cycle),GO:0000090 (mitotic anaphase),GO:0006511 (ubiquitin-dependent protein catabolic process),GO:0006512 (ubiquitin cycle),GO:0007049 (cell cycle),GO:0007067 (mitosis),GO:0008150 (biological_process),GO:0051301 (cell division)	GO:0005575 (cellular_component),GO:0005680 (anaphase-promoting complex)	GO:0003674 (molecular_function),GO:0004842 (ubiquitin-protein ligase activity),GO:0005488 (binding)	10.5966	10.664	10.643	10.9839	10.7237	10.52	10.2313	10.1848	10.0969	10.7773	10.8123	10.7017	10.8327	10.7567	10.4381	10.8426	10.6107	10.6701	10.6121	10.4614	10.3622	11.0036	10.8853	10.7016	10.9433	10.7156	11.081	11.0986	11.0194	11.025	11.0368	10.9847	10.8861	10.9869	10.8609	11.0258	10.8685	10.7447	10.8735	10.9422	10.9987	11.0729
Angptl2	26360	1421002_at	angiopoietin-like 2	3	GO:0007165 (signal transduction),GO:0007275 (multicellular organismal development)	GO:0005615 (extracellular space)	GO:0005102 (receptor binding)	6.10632	5.94804	5.20579	6.16775	6.43991	6.0126	5.18491	5.06668	4.63811	6.24892	6.32827	5.14392	6.87915	6.32521	5.77651	6.6274	7.39475	7.2553	5.52974	4.89255	4.99709	6.97998	6.50449	5.44338	5.55463	7.73746	8.38607	8.38092	8.06523	7.64148	7.77475	7.65887	7.18917	7.40874	6.86893	7.88924	7.84659	7.64595	7.62695	7.41167	7.46846	8.50914
Angptl6	70726	1424785_at	angiopoietin-like 6	22	GO:0001525 (angiogenesis),GO:0007165 (signal transduction),GO:0007275 (multicellular organismal development),GO:0030154 (cell differentiation)	GO:0005615 (extracellular space),GO:0030141 (secretory granule)	GO:0005102 (receptor binding)	5.66001	5.6307	5.46201	5.69503	5.81549	5.80386	5.4625	5.22748	5.43564	5.72582	5.3892	5.75797	5.68461	5.76559	5.40077	5.85806	5.72132	5.4252	5.11383	5.30627	5.02817	5.57968	5.37585	5.39916	5.37326	5.56351	5.70908	5.8357	5.56344	5.63589	5.65551	5.83863	5.72439	5.59884	5.55431	5.62936	5.60255	5.22527	5.46318	5.58175	5.60604	5.84912
Ank	11732	1450627_at	progressive ankylosis	1	GO:0001501 (skeletal development),GO:0006810 (transport),GO:0006817 (phosphate transport),GO:0007626 (locomotory behavior),GO:0030500 (regulation of bone mineralization)	GO:0005887 (integral to plasma membrane),GO:0016020 (membrane),GO:0016021 (integral to membrane),GO:0019867 (outer membrane)	GO:0005315 (inorganic phosphate transporter activity),GO:0015114 (phosphate transporter activity),GO:0030504 (inorganic diphosphate transporter activity)	8.83189	8.65871	8.34178	9.04491	8.93758	8.68915	7.98475	6.96064	6.58949	8.70885	8.65115	8.38434	9.02363	8.8363	8.36005	8.94422	9.53716	9.23357	8.30288	7.37967	6.84302	8.89649	8.32076	7.70686	7.03697	9.58806	9.46858	9.50804	9.2868	9.36411	9.44371	9.34112	9.38593	9.32893	9.10852	9.36967	9.50344	9.4437	9.46385	9.10295	9.63453	9.42633
Ankrd10	102334	1448199_at	ankyrin repeat domain 10	19	GO:0006355 (regulation of transcription, DNA-dependent)		GO:0003677 (DNA binding),GO:0003700 (transcription factor activity)	6.64543	5.80968	5.5876	6.67376	6.42467	5.7267	4.52463	4.35155	4.73878	6.12864	6.16591	5.74358	6.55811	6.16808	4.87889	6.98724	6.32786	5.9038	4.73222	5.12859	4.58572	6.15134	5.59416	5.36125	5.25294	6.8559	6.50116	6.71324	5.96403	6.53618	6.81803	6.79514	6.60414	6.37456	5.93882	6.66228	5.51038	5.80077	6.58089	6.15904	6.31084	6.66539
Ankrd37	654824	1436538_at	ankyrin repeat domain 37	12		GO:0005634 (nucleus)		4.23879	3.64734	3.98931	4.84085	4.51498	4.11175	4.03651	4.31611	4.61066	3.96201	3.60462	4.11451	4.5404	4.13031	3.76753	4.71758	6.53035	4.56531	3.72012	4.52722	4.86591	4.06254	3.54275	4.1309	4.70072	6.438	5.03743	5.19305	4.6037	4.90102	4.85665	4.95825	4.97656	4.74652	4.30821	5.0982	4.51043	4.48702	4.8759	4.00448	5.22977	4.83935
Ankrd44	329154	1434856_at	ankyrin repeat domain 44	20			GO:0003677 (DNA binding)	9.25536	9.31873	9.41313	9.23387	9.0593	9.39972	9.3133	8.25062	7.82241	9.18175	9.38549	9.23852	8.85583	8.90131	9.0822	9.09707	8.62349	9.12074	9.50628	8.37376	6.90506	8.82999	9.05319	7.9008	7.29383	8.51509	8.96542	9.04265	8.94575	8.80195	8.95458	8.90034	8.95214	8.84638	8.68029	8.94376	8.51323	8.65415	9.20347	9.24311	8.48207	9.00169
Ankrd46	68839	1428063_at	ankyrin repeat domain 46	10	GO:0006355 (regulation of transcription, DNA-dependent)	GO:0016020 (membrane),GO:0016021 (integral to membrane)	GO:0003677 (DNA binding),GO:0003700 (transcription factor activity)	7.94904	7.70841	7.76766	7.97491	7.66453	7.03398	6.22633	6.54964	6.5226	7.75555	7.81624	7.65825	7.9901	7.47951	7.13136	8.21106	7.25054	7.21411	6.70033	6.73038	7.11223	7.77033	7.42869	7.23873	7.19982	7.80749	8.08791	7.90162	7.3593	8.10242	8.05616	8.19572	8.0076	7.68192	7.08463	8.19062	7.82624	7.7748	7.88883	7.62923	8.03221	8.11064
Ankrd57	268301	1454736_at	ankyrin repeat domain 57	25			GO:0003677 (DNA binding)	10.5173	10.2424	9.67105	7.34564	9.82846	10.2651	9.8797	9.76697	9.25692	9.66507	9.8166	9.27905	9.20029	10.2326	9.97714	6.54727	8.88381	9.82453	9.57147	9.5621	9.23584	9.51006	9.52271	9.22457	8.72332	6.50798	6.22672	7.09223	8.78645	5.68758	6.48421	6.19993	5.93903	6.21951	8.85574	6.06506	8.46908	8.83342	9.305	9.484	6.25081	6.13137
Anln	68743	1433543_at	anillin, actin binding protein (scraps homolog, Drosophila)	1	GO:0000910 (cytokinesis),GO:0007049 (cell cycle),GO:0007067 (mitosis),GO:0051301 (cell division)	GO:0005634 (nucleus),GO:0005826 (contractile ring),GO:0005856 (cytoskeleton),GO:0015629 (actin cytoskeleton)	GO:0003779 (actin binding)	9.27904	9.00846	8.12724	9.58599	9.24701	8.76093	6.73189	5.42463	5.30825	9.13977	9.0495	8.41456	9.3468	8.89871	7.09657	9.16123	8.94447	8.8825	7.00411	5.89899	5.05249	8.91409	8.2387	6.45088	5.79731	8.99837	9.80145	9.99931	9.67722	9.67457	9.705	9.82167	9.62425	9.84638	9.65868	9.95733	9.90618	9.75489	10.1624	9.90781	9.68812	9.3755
Anp32a	11737	1434555_at	acidic (leucine-rich) nuclear phosphoprotein 32 family, member A	21		GO:0005634 (nucleus),GO:0016363 (nuclear matrix)	GO:0005515 (protein binding)	8.43105	8.83882	9.31955	8.83318	8.26098	8.68444	8.65418	9.0728	9.47115	8.29282	8.76252	9.50273	8.25384	8.33759	8.00055	8.36973	8.46105	8.92169	9.12064	9.25149	9.22617	8.47881	8.33931	8.42619	8.45128	8.49564	8.2886	8.13565	8.16341	8.19746	8.43061	8.35777	8.41135	8.33889	8.08028	8.30686	7.91069	8.53141	8.25337	8.73206	8.13733	8.39086
Anp32b	67628	1417082_at	acidic nuclear phosphoprotein 32 family, member B	5	GO:0000084 (S phase of mitotic cell cycle)	GO:0005634 (nucleus)	GO:0003674 (molecular_function),GO:0005515 (protein binding)	10.8819	10.8347	10.5472	10.8282	10.9098	10.7526	9.97034	9.36262	9.50121	10.8381	10.7915	10.7404	10.6936	10.5874	10.0991	11.1116	10.9405	10.8063	10.0634	9.5237	9.37551	10.7871	10.4071	9.8891	9.35746	11.0565	11.1833	11.158	10.9943	11.1515	11.1094	11.2967	11.2127	11.0979	10.8528	11.129	10.6963	11.0138	10.8787	10.4653	10.8764	10.9541
Anp32e	66471	1451356_at	acidic (leucine-rich) nuclear phosphoprotein 32 family, member E	1	GO:0008150 (biological_process)	GO:0005634 (nucleus),GO:0005737 (cytoplasm),GO:0016023 (cytoplasmic membrane-bound vesicle)	GO:0005515 (protein binding),GO:0019212 (phosphatase inhibitor activity)	9.09793	8.62832	8.53248	8.84497	8.92077	8.76537	8.15782	7.56374	7.41126	8.45062	8.59856	8.36817	8.58142	8.43287	8.2371	9.04852	8.7472	8.6719	8.16651	7.65531	7.3914	8.46863	8.26794	7.98805	7.41804	8.89226	9.57173	9.47592	9.46591	9.37383	9.59636	9.53203	9.64081	9.64208	9.27447	9.63305	9.15083	9.44669	9.46621	9.13021	9.46864	9.28277
Antxr1	69538	1451446_at	anthrax toxin receptor 1	12	GO:0008150 (biological_process)	GO:0005615 (extracellular space),GO:0005886 (plasma membrane),GO:0016020 (membrane),GO:0016021 (integral to membrane)	GO:0003674 (molecular_function),GO:0004872 (receptor activity),GO:0005515 (protein binding),GO:0046872 (metal ion binding)	3.09519	3.11321	2.9686	3.05157	3.07443	3.08381	3.16464	3.28065	3.41072	3.00752	3.20905	2.85478	2.96317	3.04486	3.02158	2.94734	3.14352	3.18286	3.13399	3.38752	3.30074	3.12339	3.04792	3.55893	3.17042	3.03171	3.30667	3.13865	3.12825	3.14255	3.05942	3.12591	3.12589	3.09551	3.43973	3.18368	3.42557	3.16933	3.04724	3.17116	3.30926	3.1536
Antxr2	71914	1426708_at	anthrax toxin receptor 2	7	GO:0008150 (biological_process)	GO:0005575 (cellular_component),GO:0016020 (membrane),GO:0016021 (integral to membrane)	GO:0003674 (molecular_function),GO:0004872 (receptor activity),GO:0005515 (protein binding),GO:0046872 (metal ion binding)	9.8462	9.68209	9.52194	9.88899	9.51963	9.33144	8.53567	8.28494	8.3097	9.76053	9.73092	9.50159	10.0056	9.79429	9.43591	9.73404	10.5798	10.3678	9.57124	9.01909	8.85702	10.2749	9.97493	9.77546	9.60995	10.6086	9.96334	10.0302	9.86807	9.93123	9.97569	10.0062	9.93237	9.90278	9.63017	9.83777	9.43943	9.23164	9.75691	9.37138	9.20156	9.85205
Anxa6	11749	1429247_at	annexin A6	17	GO:0006816 (calcium ion transport),GO:0006937 (regulation of muscle contraction)	GO:0048471 (perinuclear region of cytoplasm)	GO:0005509 (calcium ion binding),GO:0005515 (protein binding),GO:0005544 (calcium-dependent phospholipid binding)	4.20547	5.46825	5.82769	4.64434	4.1003	4.62625	6.52551	7.54244	6.94344	4.06729	5.9785	5.30529	4.33365	4.35459	4.61045	4.48138	4.34609	6.33408	7.39101	7.80853	7.33876	4.85643	4.94733	5.28433	6.09634	4.6822	4.20166	4.16826	4.08564	3.87887	4.14031	4.21787	4.25594	4.40086	4.18488	4.27102	5.01127	4.56004	4.41481	5.05372	4.42294	4.34901
Aoah	27052	1460156_at	Acyloxyacyl hydrolase	15	GO:0006629 (lipid metabolic process),GO:0006954 (inflammatory response),GO:0008653 (lipopolysaccharide metabolic process),GO:0050728 (negative regulation of inflammatory response)		GO:0004465 (lipoprotein lipase activity),GO:0016298 (lipase activity),GO:0016787 (hydrolase activity),GO:0016788 (hydrolase activity, acting on ester bonds),GO:0050528 (acyloxyacyl hydrolase activity)	6.62967	7.01212	7.19171	4.87081	5.97812	7.22087	6.24591	6.36071	6.51997	5.14174	6.58039	6.86148	5.17648	5.81044	5.88588	5.03014	4.31376	5.83833	5.60402	6.53642	6.48588	5.48721	5.40095	5.18166	5.20901	4.09241	4.0826	4.57411	4.9241	3.73041	4.01047	4.40387	4.43908	4.2362	5.09756	4.37136	4.52951	4.80175	4.49758	5.64448	4.38375	4.57459
Ap1s2	108012	1452657_at	adaptor-related protein complex 1, sigma 2 subunit	7	GO:0006810 (transport),GO:0006886 (intracellular protein transport),GO:0006897 (endocytosis),GO:0006898 (receptor-mediated endocytosis),GO:0015031 (protein transport),GO:0016192 (vesicle-mediated transport)	GO:0005794 (Golgi apparatus),GO:0005802 (Golgi trans face),GO:0005886 (plasma membrane),GO:0005905 (coated pit),GO:0030121 (AP-1 adaptor complex),GO:0030125 (clathrin vesicle coat),GO:0030662 (coated vesicle membrane)	GO:0005515 (protein binding),GO:0008565 (protein transporter activity)	8.84821	8.74343	8.53798	9.2845	9.02645	8.93121	8.42519	7.87296	7.77813	8.6874	8.78974	8.60826	9.25407	9.01658	8.77564	9.23149	9.64094	9.5939	9.25218	8.85445	8.53625	9.80126	9.52195	9.16286	8.74597	9.77964	9.75791	9.62599	9.51408	9.95351	10.0145	9.94288	9.9351	9.71246	9.60638	9.79005	8.64041	8.69528	9.08693	8.86214	8.91537	9.80077
Ap2a2	11772	1452490_a_at	adaptor protein complex AP-2, alpha 2 subunit	4	GO:0006461 (protein complex assembly),GO:0006810 (transport),GO:0006886 (intracellular protein transport),GO:0006897 (endocytosis),GO:0015031 (protein transport),GO:0016192 (vesicle-mediated transport)	GO:0005905 (coated pit),GO:0030117 (membrane coat),GO:0030122 (AP-2 adaptor complex),GO:0030130 (clathrin coat of trans-Golgi network vesicle),GO:0030141 (secretory granule)	GO:0005198 (structural molecule activity),GO:0005488 (binding),GO:0008289 (lipid binding)	7.30644	7.23699	7.47823	7.61822	7.81685	7.6473	7.27179	7.05666	6.84269	7.08382	7.5381	7.1491	7.52217	7.1748	7.23437	7.9691	7.63814	7.62895	7.62669	7.19951	7.06386	7.74629	7.55569	7.08815	6.41135	7.63689	7.93248	7.84544	7.57828	8.09097	8.24965	8.16944	7.96707	7.93138	7.62731	8.02357	7.03345	6.95284	6.89437	6.87681	6.99757	8.16561
Ap3m1	55946	1416375_at	adaptor-related protein complex 3, mu 1 subunit	32	GO:0006622 (protein targeting to lysosome),GO:0006810 (transport),GO:0006886 (intracellular protein transport),GO:0015031 (protein transport)	GO:0005764 (lysosome),GO:0030125 (clathrin vesicle coat),GO:0030662 (coated vesicle membrane)		6.10511	6.21079	6.31688	6.2837	5.84312	5.80573	5.83952	5.8445	5.7309	6.30023	6.3176	6.2373	6.06446	6.1031	6.22103	6.17288	6.11739	6.17758	5.54241	5.62364	5.81413	5.77379	5.92027	6.00803	5.71138	6.34896	6.26418	6.1081	6.08753	6.29352	6.07542	6.38193	6.13413	6.01383	5.46518	6.3086	6.40151	6.46943	6.01244	6.38558	6.88405	6.24461
Apba3	57267	1416182_at	amyloid beta (A4) precursor protein-binding, family A, member 3	12	GO:0006810 (transport),GO:0007242 (intracellular signaling cascade),GO:0015031 (protein transport)	GO:0016020 (membrane)	GO:0005515 (protein binding)	7.06799	6.85235	7.08162	6.40022	6.89841	6.8619	6.67694	6.42198	6.11797	6.5217	6.88723	7.08622	6.76844	6.81635	6.6906	7.06229	6.4893	6.59668	6.68197	6.4972	6.58181	6.54081	6.46157	6.10266	6.35919	6.69297	7.02377	7.02205	6.9721	6.92458	7.19993	7.10643	6.4562	6.84654	6.69109	6.94304	6.86657	6.99426	6.32777	6.70392	6.77513	6.95501
Apex1	11792	1416135_at	apurinic/apyrimidinic endonuclease 1	4	GO:0006281 (DNA repair),GO:0006284 (base-excision repair),GO:0006366 (transcription from RNA polymerase II promoter),GO:0006974 (response to DNA damage stimulus),GO:0030503 (regulation of cell redox homeostasis),GO:0051101 (regulation of DNA binding)	GO:0005634 (nucleus),GO:0005737 (cytoplasm),GO:0005783 (endoplasmic reticulum),GO:0005840 (ribosome),GO:0048471 (perinuclear region of cytoplasm)	GO:0000287 (magnesium ion binding),GO:0003677 (DNA binding),GO:0003713 (transcription coactivator activity),GO:0003714 (transcription corepressor activity),GO:0003906 (DNA-(apurinic or apyrimidinic site) lyase activity),GO:0004518 (nuclease activity),GO:0004519 (endonuclease activity),GO:0004520 (endodeoxyribonuclease activity),GO:0004523 (ribonuclease H activity),GO:0004528 (phosphodiesterase I …	8.69511	8.45682	8.17439	8.70708	8.56592	8.32615	7.49826	7.80669	7.58931	8.53717	8.57443	8.22647	8.69559	8.64978	8.14794	8.71769	9.58561	9.27022	8.34152	7.91403	7.68534	9.06997	8.67833	7.92381	7.48143	9.74452	9.05848	8.97097	8.79469	9.04985	9.14632	9.16325	8.8961	8.87391	8.59027	8.90291	8.22919	8.07723	8.26489	8.1055	8.33178	8.53408
Apobec1	11810	1451755_a_at	apolipoprotein B editing complex 1	30	GO:0006381 (mRNA editing),GO:0006397 (mRNA processing),GO:0006629 (lipid metabolic process),GO:0016554 (cytidine to uridine editing),GO:0042157 (lipoprotein metabolic process)		GO:0003723 (RNA binding),GO:0004126 (cytidine deaminase activity),GO:0008270 (zinc ion binding),GO:0016787 (hydrolase activity),GO:0016814 (hydrolase activity, acting on carbon-nitrogen (but not peptide) bonds, in cyclic amidines),GO:0046872 (metal ion binding)	10.5676	9.62487	9.16498	10.8418	10.2894	9.45914	8.97671	10.367	10.9294	10.1685	9.98568	9.25388	10.3816	9.83119	9.43631	10.8988	10.0934	9.38866	10.186	10.6045	11.0384	10.7912	10.5252	11.0535	11.5548	10.7135	10.745	10.5323	9.96509	10.6392	10.7694	10.6319	10.6971	10.5794	9.78912	10.6621	9.10243	8.71395	9.7306	8.88311	9.38932	10.7639
Aprt	11821	1423801_a_at	adenine phosphoribosyl transferase	10	GO:0006166 (purine ribonucleoside salvage),GO:0006168 (adenine salvage),GO:0007625 (grooming behavior),GO:0009116 (nucleoside metabolic process),GO:0046083 (adenine metabolic process)		GO:0002055 (adenine binding),GO:0003999 (adenine phosphoribosyltransferase activity),GO:0016208 (AMP binding),GO:0016740 (transferase activity),GO:0016757 (transferase activity, transferring glycosyl groups)	9.6302	9.54434	9.55981	9.86951	9.55448	9.48888	9.09886	9.35602	9.36178	9.85589	9.77709	9.9032	9.7786	9.48149	9.41211	9.69207	10.5667	10.2583	9.81689	9.53254	9.45225	10.172	9.86278	9.5724	9.59264	10.6729	10.3969	10.3397	10.2445	10.56	10.4697	10.5191	10.1922	10.2488	9.77347	10.2089	10.596	10.7875	10.394	10.3509	10.695	10.1854
Arbp	11837	1419441_at	acidic ribosomal phosphoprotein P0	4	GO:0006414 (translational elongation),GO:0042254 (ribosome biogenesis and assembly)	GO:0005622 (intracellular),GO:0005840 (ribosome),GO:0030529 (ribonucleoprotein complex)	GO:0003735 (structural constituent of ribosome)	12.9684	13.056	12.9983	13.0218	12.9818	12.91	12.7666	12.6647	12.6817	13.0448	13.0764	12.9682	13.0341	12.9396	12.8349	13.0515	13.0229	12.9411	12.8271	12.6812	12.7162	13.0268	12.9119	12.661	12.7272	13.0625	13.0279	13.0359	13.0057	13.0514	13.0873	13.0915	13.0212	13.0079	12.7711	12.9967	12.7419	12.3202	12.742	12.629	12.236	13.015
Arg1	11846	1419549_at	arginase 1, liver	12	GO:0000050 (urea cycle),GO:0006525 (arginine metabolic process),GO:0006527 (arginine catabolic process)		GO:0004053 (arginase activity),GO:0016787 (hydrolase activity),GO:0016813 (hydrolase activity, acting on carbon-nitrogen (but not peptide) bonds, in linear amidines),GO:0030145 (manganese ion binding),GO:0046872 (metal ion binding)	3.15007	3.39166	3.54147	3.37201	3.27633	3.24363	3.49053	3.73099	3.97919	3.33532	3.25521	3.36181	3.31803	3.28458	3.3164	3.22101	6.25746	5.5571	3.57168	3.42829	3.64119	3.56808	3.62861	3.55844	3.34652	5.90942	3.59932	3.26165	3.36938	3.75262	3.47101	3.40076	3.3223	3.41823	3.38925	3.62882	3.5312	3.55827	3.39222	3.35315	3.60565	3.3445
Arg2	11847	1418847_at	arginase type II	15	GO:0000050 (urea cycle),GO:0006525 (arginine metabolic process),GO:0006527 (arginine catabolic process),GO:0006809 (nitric oxide biosynthetic process),GO:0006941 (striated muscle contraction)	GO:0005739 (mitochondrion)	GO:0004053 (arginase activity),GO:0005515 (protein binding),GO:0016787 (hydrolase activity),GO:0016813 (hydrolase activity, acting on carbon-nitrogen (but not peptide) bonds, in linear amidines),GO:0030145 (manganese ion binding),GO:0046872 (metal ion binding)	6.33876	6.74862	7.01323	3.16867	5.18204	6.44239	5.5353	6.99696	8.11135	5.24384	6.56068	6.8908	3.95325	5.44947	4.9213	3.1272	3.73231	4.99616	4.99982	5.59638	6.24123	3.69528	3.96258	3.59557	2.99775	2.97927	3.11993	3.23032	4.32595	3.45962	3.08417	3.18179	3.2588	3.26903	3.88897	3.17572	3.51801	4.66582	3.76036	4.61734	3.60358	3.00544
Arhgap11a	228482	1438434_at	Rho GTPase activating protein 11A	1	GO:0007165 (signal transduction),GO:0008150 (biological_process)	GO:0005575 (cellular_component),GO:0005622 (intracellular)	GO:0003674 (molecular_function),GO:0005096 (GTPase activator activity)	9.67139	9.09072	8.90193	9.73257	9.59877	8.97094	9.11966	8.8729	8.72568	9.40278	9.08169	8.93805	9.51168	9.30534	9.18884	9.62066	9.3838	9.05493	9.37921	9.01917	8.75279	9.24151	9.47269	8.80361	8.302	9.29983	9.71207	9.99274	9.95099	9.57032	9.56081	9.78446	9.73928	9.82545	9.60046	9.84302	9.47096	9.4864	10.0296	9.44273	9.56497	9.49377
Arhgap15	76117	1435959_at	Rho GTPase activating protein 15	29	GO:0007165 (signal transduction),GO:0008360 (regulation of cell shape)	GO:0005622 (intracellular)	GO:0005096 (GTPase activator activity),GO:0005515 (protein binding),GO:0030675 (Rac GTPase activator activity)	7.80142	7.52106	7.46089	7.67767	7.56745	7.4919	7.19272	7.71494	8.16814	7.31922	7.62668	6.98974	7.46959	7.5527	7.23435	7.60724	6.55699	6.87114	7.23339	7.86871	8.22868	7.47324	7.57602	7.79209	7.85847	6.48844	7.2475	7.41026	7.11736	7.22587	7.08195	7.21972	7.2768	7.21609	6.86699	7.4182	7.16856	7.41443	7.79541	7.47736	7.24789	7.53737
Arhgap18	73910	1426952_at	Rho GTPase activating protein 18	16	GO:0007165 (signal transduction),GO:0008150 (biological_process)	GO:0005575 (cellular_component),GO:0005622 (intracellular)	GO:0003674 (molecular_function),GO:0005096 (GTPase activator activity)	9.68639	9.39009	8.34403	9.51491	9.61903	9.23715	7.87191	5.03693	5.23163	9.36351	9.21023	8.49177	9.58394	9.30801	8.26302	9.78701	8.89742	9.1175	8.30068	6.23793	5.04402	9.87659	8.98327	7.40662	7.18416	8.89913	9.26931	9.33193	9.1142	9.23931	9.45521	9.49119	9.48589	9.38043	9.2641	9.38105	8.79768	8.72073	9.32136	8.8364	8.61527	9.4744
Arhgap21	71435	1428368_at	Rho GTPase activating protein 21	5	GO:0007165 (signal transduction),GO:0008150 (biological_process)	GO:0005575 (cellular_component),GO:0005622 (intracellular)	GO:0003674 (molecular_function),GO:0005515 (protein binding)	8.01865	8.02901	8.24434	8.09014	7.85349	7.88348	7.56018	6.3296	6.4	7.72398	8.27827	7.90571	8.01081	7.80654	7.66021	8.03518	7.69952	7.87224	7.23288	6.82756	6.51187	7.78064	7.30936	6.65254	6.31997	7.59401	7.85537	8.01896	7.69369	7.71626	7.8138	7.63454	7.84418	7.57671	7.69096	7.81405	7.27478	7.66407	7.89896	7.55829	7.20749	7.60633
Arhgap22	239027	1435108_at	Rho GTPase activating protein 22	29	GO:0007165 (signal transduction),GO:0008150 (biological_process)	GO:0005575 (cellular_component),GO:0005622 (intracellular)	GO:0003674 (molecular_function),GO:0005096 (GTPase activator activity)	7.72633	7.78673	8.07766	7.77486	7.52532	7.56688	7.17214	6.74295	6.86175	7.51615	8.02402	8.46847	7.436	7.53744	6.9135	7.603	7.31996	7.7873	7.05531	6.66213	6.68197	7.77087	7.08519	7.52356	7.90652	7.32822	7.58208	7.8153	7.50036	7.54188	7.68124	7.54581	7.35381	7.376	7.31291	7.63302	7.79807	7.32107	7.36196	7.5687	7.1575	7.36746
Arhgap26	71302	1435694_at	Rho GTPase activating protein 26	21	GO:0007165 (signal transduction)	GO:0005622 (intracellular)	GO:0005096 (GTPase activator activity)	4.58754	4.27195	5.76034	4.27768	4.2378	4.14593	5.71878	5.35207	5.70202	3.79505	4.4031	4.89464	4.12076	4.19574	4.46419	4.47198	3.55739	3.31623	6.18014	6.07843	4.70714	3.6974	4.15813	3.47954	3.06648	3.39003	3.94066	4.34138	3.98615	4.00062	4.25283	4.22543	4.08237	3.60407	3.63128	4.15906	4.30879	4.58277	4.77142	4.26451	4.75248	3.68873
Arhgap4	171207	1419296_at	Rho GTPase activating protein 4	23	GO:0007165 (signal transduction),GO:0008150 (biological_process),GO:0051301 (cell division)	GO:0005575 (cellular_component),GO:0005622 (intracellular)	GO:0003674 (molecular_function),GO:0003743 (translation initiation factor activity),GO:0005096 (GTPase activator activity)	7.14433	7.41967	7.67006	7.48896	7.25069	7.2796	6.9897	7.18868	7.14146	6.98707	7.57313	7.98638	7.20011	7.14367	7.08973	7.21411	7.90743	7.88169	7.82321	7.25391	7.16101	8.00727	7.82102	7.00146	6.50849	7.9612	8.00658	8.02793	7.77492	8.06995	8.20284	8.16255	7.61694	7.62305	7.72731	7.85208	6.65204	6.81393	6.79986	6.64501	6.67996	7.61648
Arhgap6	11856	1456333_a_at	Rho GTPase activating protein 6	18	GO:0007015 (actin filament organization),GO:0007165 (signal transduction),GO:0007266 (Rho protein signal transduction),GO:0030041 (actin filament polymerization),GO:0043087 (regulation of GTPase activity),GO:0048041 (focal adhesion formation)	GO:0005622 (intracellular),GO:0005737 (cytoplasm),GO:0005884 (actin filament),GO:0015629 (actin cytoskeleton)	GO:0005070 (SH3/SH2 adaptor activity),GO:0005096 (GTPase activator activity),GO:0005100 (Rho GTPase activator activity)	7.33615	7.0189	6.60897	7.03509	7.41192	7.05063	7.13109	6.06194	6.01696	7.0564	7.41116	6.59636	7.65575	7.48939	6.88697	7.47846	6.03988	6.41369	6.89363	6.44393	6.06656	6.96208	6.29819	5.3543	4.99893	6.08131	6.41498	6.59468	6.30077	6.47818	6.45055	6.50349	6.05422	6.09357	6.09462	6.54311	5.52113	6.39954	6.50035	6.07745	6.02765	6.94205
Arhgdib	11857	1426454_at	Rho, GDP dissociation inhibitor (GDI) beta	32	GO:0006928 (cell motility),GO:0006955 (immune response),GO:0007162 (negative regulation of cell adhesion),GO:0007266 (Rho protein signal transduction),GO:0007275 (multicellular organismal development),GO:0030036 (actin cytoskeleton organization and biogenesis)	GO:0005737 (cytoplasm),GO:0005856 (cytoskeleton),GO:0016023 (cytoplasmic membrane-bound vesicle)	GO:0005094 (Rho GDP-dissociation inhibitor activity),GO:0005096 (GTPase activator activity),GO:0005515 (protein binding)	11.9387	11.9	11.9155	12.1906	12.1194	12.0207	11.7024	11.3493	11.2806	11.8253	11.9302	11.746	12.1135	12.0591	11.7726	12.2543	11.8943	11.8615	11.5844	11.4085	11.4401	11.9861	11.7901	11.4108	11.4584	11.9957	12.4166	12.2989	12.2546	12.3763	12.3057	12.3542	12.3468	12.3946	12.0184	12.389	12.0999	11.5142	11.7277	11.6391	11.5687	12.3989
Arhgef3	71704	1424250_a_at	Rho guanine nucleotide exchange factor (GEF) 3	24	GO:0007242 (intracellular signaling cascade),GO:0008150 (biological_process),GO:0035023 (regulation of Rho protein signal transduction)	GO:0005575 (cellular_component),GO:0005622 (intracellular)	GO:0003674 (molecular_function),GO:0005085 (guanyl-nucleotide exchange factor activity),GO:0005089 (Rho guanyl-nucleotide exchange factor activity)	9.4555	9.96539	9.7571	7.36554	8.66381	9.83137	9.97992	9.45777	9.14714	8.69404	9.25684	9.56221	7.93182	9.31019	9.92109	7.98653	6.57887	8.64903	9.27871	8.97016	8.54937	8.48932	9.76351	9.59579	8.75919	5.99111	6.26383	6.49413	7.25361	6.10378	6.18931	6.41718	6.51279	6.2784	7.34021	6.45148	6.49449	7.64907	7.20241	8.11751	6.55753	6.86386
Arhgef6	73341	1429012_at	Rac/Cdc42 guanine nucleotide exchange factor (GEF) 6	5	GO:0006915 (apoptosis),GO:0007242 (intracellular signaling cascade),GO:0007254 (JNK cascade),GO:0008150 (biological_process),GO:0035023 (regulation of Rho protein signal transduction)	GO:0005575 (cellular_component),GO:0005622 (intracellular)	GO:0003674 (molecular_function),GO:0005085 (guanyl-nucleotide exchange factor activity),GO:0005089 (Rho guanyl-nucleotide exchange factor activity),GO:0005096 (GTPase activator activity)	9.37719	9.30394	9.17273	9.47851	9.31241	9.11195	8.51838	8.10556	8.22408	9.37357	9.32033	9.27607	9.58841	9.51783	8.89113	9.39015	9.10939	9.17855	8.68107	8.16112	7.96009	9.26408	8.86708	8.31527	7.72809	9.17564	9.58835	9.50593	9.44861	9.42572	9.44912	9.41045	9.46776	9.51315	9.15763	9.69453	9.19385	8.76017	9.40331	9.02416	8.99224	9.6439
Arhgef7	54126	1449066_a_at	Rho guanine nucleotide exchange factor (GEF7)	19	GO:0007242 (intracellular signaling cascade),GO:0035023 (regulation of Rho protein signal transduction)	GO:0005622 (intracellular)	GO:0005085 (guanyl-nucleotide exchange factor activity),GO:0005089 (Rho guanyl-nucleotide exchange factor activity),GO:0005515 (protein binding)	9.37452	9.04009	8.36579	10.1678	9.56321	8.9004	7.38769	8.28657	8.37676	9.69401	9.4126	8.62811	9.66662	9.39193	8.34567	9.80758	10.0335	9.25748	7.55623	7.95461	8.1407	9.81846	8.72395	9.14522	9.19934	10.39	9.80453	9.84773	9.33787	9.92801	9.86361	9.95405	9.75353	9.76497	9.19587	9.79568	9.17743	8.54097	9.09128	8.82585	8.99356	9.74978
Arid5a	214855	1451340_at	AT rich interactive domain 5A (Mrf1 like)	24		GO:0005622 (intracellular)	GO:0003677 (DNA binding)	8.14062	7.10649	7.39743	7.36077	8.83906	8.90162	10.1221	10.2816	10.09	8.55207	7.26007	7.50993	7.32792	8.81721	10.3996	6.75934	8.05547	8.27735	9.90458	9.88372	9.83192	7.40986	9.97378	9.7469	9.17057	6.35186	6.90252	7.7047	8.56052	6.67679	6.87219	6.94389	6.98965	7.17226	8.45134	6.9907	7.82027	6.72897	7.58892	6.79662	5.74254	6.73724
Arid5b	71371	1458238_at	AT rich interactive domain 5B (Mrf1 like)	9	GO:0006350 (transcription),GO:0006355 (regulation of transcription, DNA-dependent),GO:0045892 (negative regulation of transcription, DNA-dependent)	GO:0005622 (intracellular),GO:0005634 (nucleus)	GO:0003677 (DNA binding),GO:0016564 (transcriptional repressor activity)	3.91415	5.95148	5.4731	4.0383	3.96829	5.57599	5.8509	6.31608	6.39994	4.58877	5.93841	4.73698	4.04374	6.12274	6.42245	3.94773	3.92531	4.92159	4.68026	5.0413	5.19014	4.39167	5.51948	4.3246	4.39944	3.82157	3.84253	3.46501	4.11739	3.67148	3.28398	3.85065	3.46252	3.93534	3.81205	3.65178	3.87288	4.59184	4.39149	4.93231	3.91715	4.19407
Arih2	23807	1449119_at	ariadne homolog 2 (Drosophila)	26	GO:0006511 (ubiquitin-dependent protein catabolic process),GO:0006512 (ubiquitin cycle),GO:0007275 (multicellular organismal development)	GO:0005634 (nucleus)	GO:0003676 (nucleic acid binding),GO:0005515 (protein binding),GO:0008270 (zinc ion binding),GO:0046872 (metal ion binding)	7.05952	6.91771	7.16229	6.29641	7.2859	7.44486	6.87983	6.62779	6.68534	6.62985	6.8964	7.06557	6.54866	6.61875	6.79918	6.69771	6.86785	7.04959	6.67661	6.21369	6.54378	6.47985	6.51528	6.1324	6.15229	6.41318	6.39581	6.59781	6.86062	6.22968	6.37419	6.31338	6.22164	6.13798	6.51358	6.33164	6.16459	6.38566	6.61141	6.59394	5.97979	6.31952
Arl2bp	107566	1417112_at	ADP-ribosylation factor-like 2 binding protein	1	GO:0008150 (biological_process)	GO:0005625 (soluble fraction)	GO:0005083 (small GTPase regulator activity),GO:0005096 (GTPase activator activity),GO:0005515 (protein binding)	8.95003	8.81056	9.2027	9.27405	8.93968	9.0559	8.1722	7.40884	7.36495	8.7157	9.06336	9.18552	8.71344	8.68728	8.32805	9.10753	8.49994	8.89184	8.34988	7.61232	7.38685	8.64464	8.5003	7.87033	7.78416	8.71158	9.05287	9.12116	9.17731	8.93163	8.97643	9.0545	8.95663	8.95973	8.67564	8.98123	8.94034	8.81539	9.02801	9.04628	8.85294	9.12295
Arl5b	75869	1453590_at	ADP-ribosylation factor-like 5B	24	GO:0007264 (small GTPase mediated signal transduction)	GO:0005622 (intracellular)	GO:0000166 (nucleotide binding),GO:0005525 (GTP binding)	6.65404	5.38961	4.58493	3.7733	6.51848	7.16004	5.47698	5.38582	5.43626	4.72598	5.06885	4.51126	4.89112	6.08483	5.52165	4.02294	5.21399	6.51518	5.20417	4.85866	5.25834	4.99852	4.53412	4.44947	4.37089	3.71212	3.71998	3.9416	5.52165	4.19988	3.90146	3.93343	3.7683	4.03451	5.08475	4.11299	4.41517	4.2839	4.78171	4.92349	4.01174	3.91727
Armc7	276905	1424446_at	armadillo repeat containing 7	9	GO:0008150 (biological_process)	GO:0005575 (cellular_component)	GO:0003674 (molecular_function),GO:0005488 (binding)	6.27031	6.49259	6.91347	6.94573	5.93493	6.16665	6.5044	7.17922	7.34323	6.48268	6.92885	7.01726	6.50169	5.94193	6.34372	7.05266	6.10254	6.5108	6.88549	7.4839	7.91871	6.87883	6.83304	7.32975	8.50145	7.45892	6.78362	6.41701	5.73942	6.6459	6.69111	6.90258	6.82048	6.65551	6.03894	6.62492	5.37332	5.93289	5.63064	6.34197	6.5549	6.69466
Armcx6	278097	1434409_at	armadillo repeat containing, X-linked 6	8		GO:0016020 (membrane),GO:0016021 (integral to membrane)		5.08839	4.7099	4.9863	4.88784	5.30536	6.07569	6.70298	8.42624	8.48448	4.93274	4.82475	4.91228	5.27294	6.06407	7.50466	4.88887	5.17331	5.79221	7.8316	8.61308	8.70846	5.23087	7.26101	8.08021	7.81593	5.12293	5.168	5.19443	5.57676	4.96996	5.14641	5.32124	5.1638	4.87439	5.3668	4.96439	5.09496	5.19485	5.1715	4.74485	4.90717	4.95825
Arpc2	76709	1442295_at	Actin related protein 2/3 complex, subunit 2	31	GO:0006928 (cell motility),GO:0008150 (biological_process),GO:0030833 (regulation of actin filament polymerization)	GO:0005856 (cytoskeleton),GO:0005885 (Arp2/3 protein complex),GO:0005925 (focal adhesion)	GO:0003674 (molecular_function),GO:0005200 (structural constituent of cytoskeleton)	5.62146	6.76585	7.43318	4.76584	5.40444	5.69315	6.53058	7.02209	6.59176	6.82562	6.98524	7.38969	5.97682	7.3579	7.29347	5.70922	5.67659	5.76874	5.44528	6.43234	6.03965	5.83241	6.07425	5.65157	6.68367	6.79986	5.38324	4.5236	4.84115	5.60851	5.32247	5.69963	5.56928	4.93418	3.85904	5.52235	4.9912	5.57442	5.38803	5.12944	5.72772	5.28559
Arpc3	56378	1448279_at	actin related protein 2/3 complex, subunit 3	7	GO:0006928 (cell motility),GO:0030833 (regulation of actin filament polymerization)	GO:0005856 (cytoskeleton),GO:0005885 (Arp2/3 protein complex),GO:0015629 (actin cytoskeleton),GO:0030027 (lamellipodium)	GO:0005200 (structural constituent of cytoskeleton)	12.4052	12.3165	12.2498	12.4424	12.3093	12.2765	12.1711	12.1318	12.1738	12.2877	12.349	12.1617	12.3748	12.3685	12.1779	12.4874	12.1242	12.0688	12.2005	12.1001	12.2164	12.3346	12.1782	11.9699	12.1281	12.2701	12.3494	12.3148	12.2546	12.1652	12.271	12.1959	12.289	12.2497	11.9703	12.4034	11.9231	11.675	12.059	11.8297	11.5922	12.4281
Arpp19	59046	1450685_at	cAMP-regulated phosphoprotein 19	2	GO:0008150 (biological_process),GO:0045722 (positive regulation of gluconeogenesis),GO:0046326 (positive regulation of glucose import)	GO:0005575 (cellular_component)	GO:0003674 (molecular_function),GO:0005102 (receptor binding),GO:0015459 (potassium channel regulator activity)	7.56202	7.32479	7.26655	7.84005	7.12448	6.87976	6.01796	6.00686	5.99718	7.26928	7.41146	7.02663	7.29967	7.05501	6.77155	7.50945	7.56245	7.49643	6.38794	6.03084	5.71157	7.32909	6.93468	6.52969	6.07056	7.92038	7.48513	7.44387	7.29078	7.38013	7.66292	7.63003	7.60763	7.63617	7.19695	7.52363	6.56802	6.62457	6.91422	6.68922	6.82729	6.96948
Arrb1	109689	1460444_at	arrestin, beta 1	5	GO:0007165 (signal transduction),GO:0007600 (sensory perception),GO:0008277 (regulation of G-protein coupled receptor protein signaling pathway),GO:0050896 (response to stimulus)	GO:0005622 (intracellular),GO:0005624 (membrane fraction),GO:0005625 (soluble fraction),GO:0005737 (cytoplasm),GO:0005834 (heterotrimeric G-protein complex),GO:0005886 (plasma membrane)	GO:0004857 (enzyme inhibitor activity),GO:0005515 (protein binding)	7.99787	7.67956	7.30867	8.09082	7.86044	7.50372	5.6044	4.69417	4.20174	7.69548	7.9555	7.72021	7.95642	7.73785	6.80274	8.06087	8.07367	7.83079	5.95021	4.14887	4.26331	8.19902	6.91371	4.68119	5.38222	8.13683	8.35835	8.61935	8.34257	8.51028	8.74167	8.63207	8.47417	8.3932	8.0704	8.56819	8.18262	8.09174	8.29175	7.97219	8.49254	8.36038
Arrdc4	66412	1426818_at	arrestin domain containing 4	9	GO:0008150 (biological_process),GO:0008203 (cholesterol metabolic process)	GO:0005575 (cellular_component),GO:0005792 (microsome)	GO:0003674 (molecular_function),GO:0004772 (sterol O-acyltransferase activity)	4.56193	4.93156	6.09407	4.49313	4.44345	5.1246	5.65619	6.19078	6.67734	3.95419	4.65519	5.89897	4.07856	5.10712	5.12754	4.3953	4.72905	5.6041	5.93193	5.63367	5.86829	4.74848	6.5488	6.75732	5.84612	4.50641	4.59215	4.86502	4.69782	4.22745	4.26847	4.44436	4.26049	4.34142	4.55582	4.26121	4.55409	4.85883	4.83736	5.22697	4.32612	4.58828
Arts1	80898	1416942_at	type 1 tumor necrosis factor receptor shedding aminopeptidase regulator	6	GO:0001525 (angiogenesis),GO:0006508 (proteolysis),GO:0006509 (membrane protein ectodomain proteolysis),GO:0008217 (blood pressure regulation),GO:0019885 (antigen processing and presentation of endogenous peptide antigen via MHC class I),GO:0045088 (regulation of innate immune response),GO:0045444 (fat cell differentiation),GO:0045766 (positive regulation of angiogenesis)	GO:0005576 (extracellular region),GO:0005615 (extracellular space),GO:0005737 (cytoplasm),GO:0005783 (endoplasmic reticulum),GO:0005788 (endoplasmic reticulum lumen),GO:0005829 (cytosol),GO:0016021 (integral to membrane)	GO:0004177 (aminopeptidase activity),GO:0004178 (leucyl aminopeptidase activity),GO:0004179 (membrane alanyl aminopeptidase activity),GO:0004239 (methionyl aminopeptidase activity),GO:0004872 (receptor activity),GO:0005138 (interleukin-6 receptor binding),GO:0005151 (interleukin-1, Type II receptor binding),GO:0005164 (tumor necrosis factor receptor binding),GO:0005515 (protein binding),GO:000823…	8.09304	8.14248	8.52603	7.92488	7.92954	8.08432	8.52446	8.91465	8.8246	7.71711	8.1316	8.24806	7.93633	7.92124	8.41861	8.06991	8.10617	8.34596	8.41227	8.86485	8.87209	8.32975	8.66585	8.8574	8.97915	8.16253	8.09904	8.16174	7.84982	8.08366	8.02093	8.32151	8.19026	8.13618	7.66642	8.08472	7.11641	7.39914	7.4171	7.47002	7.14072	7.96692
Asf1b	66929	1423714_at	ASF1 anti-silencing function 1 homolog B (S. cerevisiae)	3	GO:0006334 (nucleosome assembly)	GO:0000785 (chromatin)	GO:0042393 (histone binding)	8.62943	8.50999	8.08444	8.8057	8.71146	8.49528	7.41405	6.85398	6.79819	8.69193	8.59706	8.24359	8.59939	8.48993	7.76658	8.75546	8.7738	8.69768	7.89825	7.16241	7.04709	8.69496	8.23316	7.62992	7.39127	8.86242	9.72711	9.75578	9.67926	9.85638	9.9355	9.87672	9.63407	9.73794	9.38508	9.75997	9.63945	9.23955	9.41357	8.99198	9.41647	9.05886
Ash2l	23808	1420616_at	ash2 (absent, small, or homeotic)-like (Drosophila)	2	GO:0006350 (transcription),GO:0006355 (regulation of transcription, DNA-dependent),GO:0006366 (transcription from RNA polymerase II promoter),GO:0030097 (hemopoiesis)	GO:0005634 (nucleus),GO:0035097 (histone methyltransferase complex)	GO:0003677 (DNA binding),GO:0005515 (protein binding),GO:0008270 (zinc ion binding),GO:0030528 (transcription regulator activity),GO:0046872 (metal ion binding)	8.49794	8.62415	8.57256	8.39515	8.6157	8.51576	8.19795	7.67323	7.78758	8.3272	8.53637	8.45669	8.65705	8.38012	8.18807	8.79064	8.48424	8.39779	7.96962	7.98095	7.95641	8.38576	8.25463	7.85147	7.91913	8.52083	8.80436	8.80537	8.56538	8.73304	8.91645	8.74196	8.6741	8.76785	8.20788	8.71098	7.9818	8.0261	7.99916	7.87555	7.68429	8.52592
Asnsd1	70396	1430656_a_at	asparagine synthetase domain containing 1	10	GO:0006529 (asparagine biosynthetic process),GO:0018346 (protein amino acid prenylation)		GO:0004066 (asparagine synthase (glutamine-hydrolyzing) activity),GO:0008318 (protein prenyltransferase activity),GO:0016740 (transferase activity),GO:0016787 (hydrolase activity)	8.85172	8.92514	8.72053	9.21033	8.77336	8.53569	7.8822	8.0252	8.16339	8.81889	8.95245	8.73296	9.24057	8.98936	8.46254	9.18281	9.30077	9.07509	8.5199	8.3266	8.23318	9.35988	8.97675	8.52416	8.49708	9.48005	9.19253	9.12102	8.87552	9.24714	9.44665	9.38762	9.32787	9.2911	8.79045	9.19261	9.35268	8.9806	9.25401	9.03729	9.13785	9.31064
Aspm	12316	1422814_at	asp (abnormal spindle)-like, microcephaly associated (Drosophila)	3	GO:0007049 (cell cycle),GO:0007067 (mitosis),GO:0008150 (biological_process),GO:0021873 (forebrain neuroblast division),GO:0045665 (negative regulation of neuron differentiation),GO:0045769 (negative regulation of asymmetric cell division),GO:0051301 (cell division),GO:0051661 (maintenance of centrosome localization)	GO:0000922 (spindle pole),GO:0005575 (cellular_component),GO:0005634 (nucleus)	GO:0003674 (molecular_function),GO:0005488 (binding),GO:0005516 (calmodulin binding)	8.21847	7.60428	6.75918	8.16901	8.00826	7.29149	5.03624	3.93731	3.85229	8.00972	7.86435	7.08979	8.10877	7.69607	6.14653	7.99413	6.73968	6.78946	5.40471	4.59724	4.07953	7.37333	6.72089	4.96799	4.64436	6.94053	8.26338	8.57566	8.20097	7.88609	7.96318	7.99395	8.13493	7.98788	7.99854	8.52717	8.32675	8.16121	8.93318	8.37876	8.22562	8.30819
Atad2	70472	1436174_at	ATPase family, AAA domain containing 2	3			GO:0000166 (nucleotide binding),GO:0005524 (ATP binding),GO:0017111 (nucleoside-triphosphatase activity)	9.17566	8.8655	7.56032	9.38397	8.95095	8.71816	6.39827	5.58125	6.21723	9.02305	8.93613	7.93314	8.91216	8.74625	7.0123	9.15921	9.11407	8.93957	6.30795	5.46069	5.47279	9.03467	7.97333	6.58829	6.69063	9.22465	9.63308	9.79201	9.54572	9.65729	9.88876	9.76294	9.76834	9.74183	9.48483	9.66104	9.4843	9.21245	9.59736	8.81124	9.52506	8.73565
Atad3a	108888	1422461_at	ATPase family, AAA domain containing 3A	4		GO:0005739 (mitochondrion),GO:0005743 (mitochondrial inner membrane),GO:0016020 (membrane)	GO:0000166 (nucleotide binding),GO:0005524 (ATP binding),GO:0017111 (nucleoside-triphosphatase activity)	7.04769	6.73006	6.80441	7.10766	6.64301	6.52895	5.8962	5.78224	5.78043	6.72662	6.63624	6.962	6.56825	6.38764	6.10317	6.84615	7.5078	7.54475	6.59855	6.15325	5.72483	7.13159	6.56239	5.915	5.28418	7.56126	6.9202	7.02938	6.80484	6.88769	6.81595	7.27328	6.67209	6.58238	6.36471	6.74412	6.14795	6.55194	6.18656	6.32046	6.36323	6.60415
Atf6	226641	1435444_at	activating transcription factor 6	18	GO:0006355 (regulation of transcription, DNA-dependent),GO:0006357 (regulation of transcription from RNA polymerase II promoter),GO:0006457 (protein folding),GO:0006950 (response to stress),GO:0006986 (response to unfolded protein),GO:0006990 (unfolded protein response, positive regulation of target gene transcription),GO:0007165 (signal transduction)	GO:0005634 (nucleus),GO:0005635 (nuclear envelope),GO:0005641 (nuclear envelope lumen),GO:0005654 (nucleoplasm),GO:0005783 (endoplasmic reticulum),GO:0005789 (endoplasmic reticulum membrane),GO:0016021 (integral to membrane)	GO:0003677 (DNA binding),GO:0003700 (transcription factor activity),GO:0003702 (RNA polymerase II transcription factor activity),GO:0003713 (transcription coactivator activity),GO:0043565 (sequence-specific DNA binding),GO:0046983 (protein dimerization activity)	8.7887	8.67573	8.6455	8.84309	8.53661	8.3298	7.7321	7.65394	7.85668	8.73823	8.84383	8.69719	8.77997	8.61201	8.39017	8.75521	8.27867	8.18991	7.80327	7.6953	7.66262	8.35741	8.11588	7.6177	7.756	8.30442	8.29998	8.46384	8.18089	8.1731	8.39555	8.3873	8.38434	8.3488	8.00542	8.36279	7.99693	7.83093	8.204	7.92216	7.72221	8.24956
Atf7ip	54343	1449192_at	activating transcription factor 7 interacting protein	22	GO:0000122 (negative regulation of transcription from RNA polymerase II promoter),GO:0006306 (DNA methylation),GO:0045892 (negative regulation of transcription, DNA-dependent),GO:0045893 (positive regulation of transcription, DNA-dependent),GO:0045898 (regulation of transcriptional preinitiation complex formation)	GO:0005634 (nucleus),GO:0005667 (transcription factor complex)	GO:0003714 (transcription corepressor activity),GO:0005515 (protein binding),GO:0016887 (ATPase activity)	6.98496	6.49476	6.78873	6.78794	6.84165	6.48654	6.11549	6.25723	6.77419	6.79801	6.75387	6.79174	6.69465	6.68473	6.09745	6.62876	6.73499	6.38392	6.27226	6.4584	7.04665	6.55271	6.37462	6.8903	7.13436	6.52829	6.60313	6.8269	6.57376	6.42023	6.34769	6.82802	6.52725	6.53961	6.29742	6.68043	6.85809	6.41218	6.65218	6.43157	6.10146	6.58099
Atic	108147	1428506_at	5-aminoimidazole-4-carboxamide ribonucleotide formyltransferase/IMP cyclohydrolase	4	GO:0006139 (nucleobase, nucleoside, nucleotide and nucleic acid metabolic process),GO:0006164 (purine nucleotide biosynthetic process)		GO:0003824 (catalytic activity),GO:0003937 (IMP cyclohydrolase activity),GO:0004643 (phosphoribosylaminoimidazolecarboxamide formyltransferase activity),GO:0016740 (transferase activity),GO:0016787 (hydrolase activity)	8.95618	8.66838	8.71556	9.20056	9.20215	8.92229	8.51825	8.50036	7.95037	9.18168	9.0485	8.89166	8.68365	8.61013	8.47923	9.29232	10.0446	9.66946	8.65376	8.3607	8.05365	8.9298	8.92068	8.46142	7.89151	10.0648	9.60475	9.70485	9.52617	9.67857	9.6856	9.75312	9.50588	9.45896	9.07591	9.4307	9.43041	9.20702	8.89184	8.83325	9.18686	9.14431
Atp13a3	224088	1434513_at	ATPase type 13A3	5	GO:0006810 (transport),GO:0006812 (cation transport),GO:0008150 (biological_process),GO:0008152 (metabolic process)	GO:0005575 (cellular_component),GO:0016020 (membrane),GO:0016021 (integral to membrane)	GO:0000166 (nucleotide binding),GO:0000287 (magnesium ion binding),GO:0003674 (molecular_function),GO:0003824 (catalytic activity),GO:0005524 (ATP binding),GO:0015662 (ATPase activity, coupled to transmembrane movement of ions, phosphorylative mechanism),GO:0016787 (hydrolase activity),GO:0016820 (hydrolase activity, acting on acid anhydrides, catalyzing transmembrane movement of substances),GO:0…	8.84842	8.36783	8.25194	8.22227	8.25674	8.47394	7.65938	6.31045	6.33632	8.22086	8.38995	8.34933	8.24	8.13734	7.66647	8.42504	8.31574	8.28193	7.44043	5.85813	4.98285	7.99196	7.2932	5.95994	4.60881	8.24706	8.08621	8.31608	8.18215	8.17022	8.04623	8.27868	8.4184	8.14257	8.17444	8.33246	8.37411	8.59659	8.66397	8.46222	8.31699	8.15343
Atp1b3	11933	1423126_at	ATPase, Na+/K+ transporting, beta 3 polypeptide	9	GO:0006810 (transport),GO:0006811 (ion transport),GO:0006813 (potassium ion transport),GO:0006814 (sodium ion transport)	GO:0005737 (cytoplasm),GO:0016020 (membrane),GO:0016021 (integral to membrane)	GO:0005391 (sodium:potassium-exchanging ATPase activity),GO:0030955 (potassium ion binding),GO:0031402 (sodium ion binding)	11.5894	11.5516	11.652	11.456	11.5338	11.4794	11.7151	11.7913	11.7092	11.3848	11.4911	11.5028	11.6336	11.5594	11.7045	11.5949	11.1239	11.1918	11.6807	11.9309	12.0691	11.2226	11.5994	11.8316	11.9727	11.1422	11.3587	11.3486	11.3545	11.3729	11.358	11.3429	11.3407	11.4043	11.149	11.3371	11.2775	11.0918	11.7279	11.2372	10.8908	11.4532
Atp6v0a2	21871	1449870_a_at	ATPase, H+ transporting, lysosomal V0 subunit A2	9	GO:0006810 (transport),GO:0006811 (ion transport),GO:0006955 (immune response),GO:0015992 (proton transport)	GO:0001669 (acrosome),GO:0005615 (extracellular space),GO:0016020 (membrane),GO:0016021 (integral to membrane)	GO:0005515 (protein binding),GO:0015078 (hydrogen ion transporter activity)	6.58133	6.81958	6.81562	6.57864	6.47545	6.45983	7.01663	7.77024	7.73077	6.55749	6.84556	6.80602	6.5104	6.61479	7.1281	6.65458	6.75035	6.64574	6.86782	7.72174	7.81817	6.3745	7.21354	7.71115	7.87764	6.9007	6.46971	6.38333	6.24099	6.58928	6.68613	6.76089	6.36032	6.03281	5.7811	6.34137	6.65569	6.80679	6.62783	6.62905	6.90643	6.40288
Atp8b4	241633	1439814_at	ATPase, class I, type 8B, member 4	20	GO:0006810 (transport),GO:0006812 (cation transport),GO:0008150 (biological_process),GO:0008152 (metabolic process),GO:0015914 (phospholipid transport)	GO:0005575 (cellular_component),GO:0016020 (membrane),GO:0016021 (integral to membrane)	GO:0000287 (magnesium ion binding),GO:0003674 (molecular_function),GO:0003824 (catalytic activity),GO:0004012 (phospholipid-translocating ATPase activity),GO:0005524 (ATP binding),GO:0015662 (ATPase activity, coupled to transmembrane movement of ions, phosphorylative mechanism),GO:0016887 (ATPase activity),GO:0031177 (phosphopantetheine binding)	10.2258	10.2107	9.99615	10.5627	9.97787	10.1277	9.4481	8.28474	7.64494	9.81085	10.1473	9.9256	9.98132	9.86043	9.49912	10.1003	9.53843	9.87535	9.19492	8.32121	7.14686	10.1702	9.73989	8.86298	8.25476	9.64645	9.7747	9.75888	9.64162	9.75301	9.79479	9.87605	9.90147	9.9189	9.48283	9.90092	9.55184	9.52994	9.58156	9.74277	9.35091	9.67682
Atxn10	54138	1422576_at	ataxin 10	2	GO:0008150 (biological_process)	GO:0005575 (cellular_component),GO:0005737 (cytoplasm)	GO:0003674 (molecular_function),GO:0005488 (binding)	9.82562	9.6065	9.65866	9.56931	9.75847	9.57928	9.20233	9.17822	9.08413	9.39246	9.67037	9.57779	9.76028	9.69605	9.59624	9.86211	9.62944	9.51398	9.38599	9.19303	9.21992	9.61005	9.5604	9.32657	9.27197	9.72955	9.87003	9.85651	9.63098	9.83195	9.81598	9.87645	9.62076	9.63796	9.32385	9.70705	9.42586	9.06762	9.53893	9.36574	9.02701	9.76212
Atxn7l4	72174	1428279_a_at	ataxin 7-like 4	6	GO:0008150 (biological_process)	GO:0005575 (cellular_component)	GO:0003674 (molecular_function)	6.5826	6.33736	6.60021	6.88084	6.66212	6.73934	6.9282	8.08797	8.28052	6.15995	6.47596	7.00999	5.7769	6.02829	6.56639	6.64092	7.11068	7.30042	8.00955	8.28869	8.32298	7.43397	7.79849	7.92391	8.28012	7.00545	6.59296	6.69048	6.42472	6.62572	6.96086	6.88489	6.96765	6.76608	6.568	6.37318	5.32623	5.5905	6.19895	6.06662	6.08473	6.41114
Aurka	20878	1424511_at	aurora kinase A	1	GO:0000278 (mitotic cell cycle),GO:0006468 (protein amino acid phosphorylation),GO:0007049 (cell cycle),GO:0007051 (spindle organization and biogenesis),GO:0007067 (mitosis),GO:0031647 (regulation of protein stability),GO:0048015 (phosphoinositide-mediated signaling)	GO:0005634 (nucleus),GO:0005819 (spindle)	GO:0000166 (nucleotide binding),GO:0004672 (protein kinase activity),GO:0004674 (protein serine/threonine kinase activity),GO:0004713 (protein-tyrosine kinase activity),GO:0005515 (protein binding),GO:0005524 (ATP binding),GO:0016301 (kinase activity),GO:0016740 (transferase activity),GO:0031625 (ubiquitin protein ligase binding)	8.28916	8.07165	7.73779	8.63817	8.34603	7.78371	6.04243	6.08735	6.01816	8.47157	8.27105	8.02958	8.20692	7.98406	6.68018	8.49786	8.06412	7.81986	6.63298	6.16824	6.31261	7.93909	7.19142	6.4148	6.68885	8.22113	9.12798	9.29681	9.02561	8.89624	9.0063	8.82109	8.86335	8.92416	8.56294	9.23837	8.77526	8.46483	8.9068	8.57195	8.59647	8.63552
Avpi1	69534	1423122_at	arginine vasopressin-induced 1	10	GO:0000187 (activation of MAPK activity)	GO:0005575 (cellular_component)	GO:0003674 (molecular_function)	6.52332	6.2218	5.99071	6.34267	6.30755	6.12113	5.4636	5.35909	4.7282	6.28354	6.38253	6.15254	6.53331	6.32016	5.84353	6.39798	7.11539	6.85313	5.72658	5.44626	5.2995	6.77413	6.26175	5.82619	5.15403	7.11607	7.14672	7.17813	6.92743	6.99798	7.06069	6.96849	6.83879	6.93188	6.61377	7.20545	6.68669	6.39473	6.60088	6.07095	6.11139	6.93677
Axud1	215418	1434350_at	AXIN1 up-regulated 1	27	GO:0006915 (apoptosis)	GO:0005575 (cellular_component),GO:0005634 (nucleus)	GO:0003674 (molecular_function)	9.88525	8.13948	7.78086	7.08841	11.1722	10.3486	9.12451	8.81863	9.19324	8.87765	7.61058	7.61449	10.4027	10.5338	10.0725	6.09106	10.4083	9.92023	9.10034	8.68168	8.98938	9.14091	9.02626	8.53293	8.13937	6.5608	6.55061	8.68232	10.5377	6.41268	6.44123	6.42294	6.43235	7.254	10.6776	6.56029	9.70621	7.07936	9.5693	7.43598	6.24229	6.37406
Azi2	27215	1431822_a_at	5-azacytidine induced gene 2	13	GO:0007249 (I-kappaB kinase/NF-kappaB cascade)	GO:0005737 (cytoplasm)		9.46815	9.39485	9.86792	9.16595	9.07296	9.93827	11.2646	11.0513	11.0007	9.06132	9.37905	9.58456	8.97727	9.3973	10.9628	9.17251	8.89569	9.56553	10.9621	11.1696	11.0817	9.34346	10.582	10.85	10.7489	8.9592	9.01376	9.07317	9.08582	8.90441	8.9886	8.92283	8.94684	8.91446	8.79734	8.98038	8.18495	8.69246	8.88554	8.80674	8.38534	9.06559
B230118G17Rik	68165	1430293_a_at	RIKEN cDNA B230118G17 gene	4	GO:0006118 (electron transport),GO:0006355 (regulation of transcription, DNA-dependent),GO:0006810 (transport)	GO:0005634 (nucleus)	GO:0000166 (nucleotide binding),GO:0003676 (nucleic acid binding),GO:0003700 (transcription factor activity),GO:0003723 (RNA binding),GO:0005506 (iron ion binding),GO:0008270 (zinc ion binding),GO:0009055 (electron carrier activity),GO:0043565 (sequence-specific DNA binding),GO:0046872 (metal ion binding),GO:0051536 (iron-sulfur cluster binding)	8.43926	8.45703	8.70332	8.34761	8.30748	8.4336	8.26076	8.00159	7.8887	8.33831	8.61804	8.74186	8.23423	8.08798	8.14938	8.3167	8.61224	8.81688	8.33335	8.21767	8.0284	8.39445	8.48192	8.36635	8.06412	8.73832	8.46443	8.37907	8.48462	8.42741	8.5586	8.50409	8.21556	8.1373	7.81998	8.207	7.78663	7.97471	8.05978	8.19173	7.72408	8.15341
B230120H23Rik	65964	1418943_at	RIKEN cDNA B230120H23 gene	1	GO:0000075 (cell cycle checkpoint),GO:0000077 (DNA damage checkpoint),GO:0000186 (activation of MAPKK activity),GO:0006468 (protein amino acid phosphorylation),GO:0006950 (response to stress),GO:0007010 (cytoskeleton organization and biogenesis),GO:0007049 (cell cycle),GO:0007050 (cell cycle arrest),GO:0007243 (protein kinase cascade),GO:0007257 (activation of JNK activity),GO:0008219 (cell death…	GO:0005634 (nucleus),GO:0005737 (cytoplasm),GO:0016020 (membrane)	GO:0000166 (nucleotide binding),GO:0000287 (magnesium ion binding),GO:0004672 (protein kinase activity),GO:0004674 (protein serine/threonine kinase activity),GO:0004709 (MAP kinase kinase kinase activity),GO:0004713 (protein-tyrosine kinase activity),GO:0005524 (ATP binding),GO:0016301 (kinase activity),GO:0016740 (transferase activity),GO:0042802 (identical protein binding),GO:0046872 (metal ion…	7.28716	7.05485	6.50467	6.27897	6.97955	7.18476	6.54574	5.43577	5.26992	6.367	6.7911	6.51218	6.90123	6.83878	7.0736	6.81399	6.06929	6.69667	6.19552	5.02598	5.31103	6.3991	6.35808	4.9269	4.88806	5.97885	6.81481	6.99117	6.99509	6.54061	6.78739	6.9579	6.84159	6.7447	6.7313	6.89117	6.17643	6.30505	6.52699	6.24686	6.1789	6.35013
B230308N11Rik	320060	1454872_at	RIKEN cDNA B230308N11 gene	5				8.22434	8.27124	7.9726	8.46473	8.09736	7.94538	7.50837	7.03597	6.99846	8.08894	8.19625	8.02544	8.17115	8.01582	7.70254	8.36526	8.21901	8.07452	7.38398	7.18114	7.04922	8.04824	7.7804	7.36766	6.94864	8.25383	8.14621	8.21652	7.95684	7.99318	8.23252	8.11818	8.31465	8.08391	7.87656	8.14527	7.69076	7.94207	8.20606	7.91404	8.13067	7.78492
B230337E12Rik	98262	1434671_at	RIKEN cDNA B230337E12 gene	5				7.30878	6.56498	6.46099	6.84933	6.6849	6.43417	5.44907	4.87968	5.03395	6.52593	6.85802	6.53143	6.86412	6.59923	6.09737	6.7808	6.91825	6.61203	5.47883	4.97481	4.67393	6.46064	5.77774	4.82235	4.80909	6.92585	6.48858	6.57353	6.16379	6.35825	6.47014	6.38349	6.39016	5.78387	5.92768	6.38868	5.60611	6.07799	6.6405	6.12269	6.32922	6.40018
B3gnt1	108902	1452346_at	UDP-GlcNAc:betaGal beta-1,3-N-acetylglucosaminyltransferase 1	2	GO:0030311 (poly-N-acetyllactosamine biosynthetic process)	GO:0005615 (extracellular space),GO:0016020 (membrane),GO:0016021 (integral to membrane),GO:0030173 (integral to Golgi membrane)	GO:0008532 (N-acetyllactosaminide beta-1,3-N-acetylglucosaminyltransferase activity),GO:0016740 (transferase activity),GO:0016757 (transferase activity, transferring glycosyl groups)	7.16923	7.09074	6.85449	7.03084	7.15279	7.00092	6.45619	6.55964	6.5741	7.00162	7.031	6.65813	7.28529	7.19587	6.98928	7.2612	7.32686	7.40759	7.09045	6.91912	6.85191	7.54641	7.31313	7.05593	7.09763	7.53086	7.50146	7.34133	7.33115	7.5129	7.59565	7.64758	7.45134	7.4446	7.28962	7.37114	7.23744	7.22133	7.15582	7.16704	6.55303	7.53667
B3gnt8	232984	1425128_at	UDP-GlcNAc:betaGal beta-1,3-N-acetylglucosaminyltransferase 8	14	GO:0006486 (protein amino acid glycosylation),GO:0030311 (poly-N-acetyllactosamine biosynthetic process)	GO:0016020 (membrane)	GO:0008378 (galactosyltransferase activity),GO:0016262 (protein N-acetylglucosaminyltransferase activity),GO:0016740 (transferase activity),GO:0016757 (transferase activity, transferring glycosyl groups)	7.35847	7.17908	6.48686	7.20273	7.37541	6.66615	4.96601	5.30983	5.46892	7.33598	7.43945	6.96188	7.53722	7.3553	5.35068	7.54546	6.78659	6.48299	4.59645	5.05334	5.60494	6.78736	5.41152	5.45194	6.97957	7.11604	7.71804	7.71868	7.50048	7.68123	7.70717	7.81208	7.26108	7.25061	6.80879	7.72066	7.72222	7.38816	7.51017	7.41257	7.67699	7.74247
B430201A12Rik	329739	1455033_at	RIKEN cDNA B430201A12 gene	17				8.08367	10.6412	11.2251	8.43136	8.28021	9.90771	10.9069	11.3695	11.0868	9.76898	10.0754	10.3624	9.59241	10.7927	11.6658	8.2186	8.34399	9.19458	9.88471	9.76257	9.57118	8.83637	10.2243	9.16393	8.31161	8.61492	8.31953	7.41938	8.27374	8.06632	8.40482	8.45871	8.6311	8.26374	7.51022	8.23059	9.08553	9.32326	8.74842	9.08511	9.54605	8.44763
BB128963	233315	1452288_at	expressed sequence BB128963	14	GO:0046839 (phospholipid dephosphorylation)		GO:0004437 (inositol or phosphatidylinositol phosphatase activity)	8.77062	7.8362	7.33663	9.39666	8.71822	7.82377	5.85711	6.60635	7.48411	8.64141	7.99333	7.43644	8.93024	8.59926	6.48604	8.8706	9.17761	8.94655	6.11637	6.67681	7.25324	9.37705	6.93226	7.64908	8.59826	9.20896	9.13618	9.12253	8.7218	8.85358	9.05631	9.05254	8.86661	8.94006	8.38819	8.96393	8.70049	8.03583	8.72323	7.93104	8.50212	9.14946
BB220380	104709	1437956_at	expressed sequence BB220380	17				6.86469	7.43944	8.57792	6.71743	6.57778	7.05207	8.70541	8.90721	8.8402	6.78263	7.47166	8.54709	6.8513	6.64135	7.92647	6.7154	6.15645	6.94162	8.77669	8.78762	8.57022	6.70483	8.04373	7.90238	7.60594	6.22232	6.3355	6.79526	6.42506	6.33785	6.25534	6.20358	6.04024	6.2073	5.92229	6.58986	6.26514	6.7053	6.81389	6.79986	6.43691	6.72471
BC004022	80750	1418154_at	cDNA sequence BC004022	13				8.16535	8.97588	9.12933	7.19464	7.46916	9.04693	10.301	10.6591	10.5198	8.08698	8.58054	8.755	7.5534	9.09612	9.84404	7.25099	7.36792	8.85872	10.3704	10.2866	10.2294	8.35094	9.93775	9.42749	9.25915	7.29506	7.049	7.31095	7.6791	6.92704	7.26071	6.98658	6.71861	6.70188	7.12709	7.00352	7.22356	7.70313	7.77367	8.18102	6.94948	7.069
BC004044	80752	1417688_at	cDNA sequence BC004044	26				9.93818	10.6862	11.4107	8.5749	9.47349	10.2342	9.50372	8.93567	9.38784	9.9069	10.7646	11.4865	8.8803	9.63397	9.78006	8.31891	9.22364	9.6522	9.30438	8.69238	9.73135	9.84137	9.57189	9.12979	10.0229	9.25925	8.3347	8.58893	9.36926	8.17028	8.41743	8.3343	8.2658	8.34427	8.61166	8.45816	9.24511	9.87715	9.49034	10.3853	8.47378	9.0768
BC004728	207818	1425108_a_at	cDNA sequence BC004728	7				8.21165	8.14481	7.84517	8.40138	8.38627	8.02717	7.77138	8.04033	7.89849	8.39048	8.29689	8.22643	8.30628	8.39428	8.39497	8.53674	8.12115	7.91328	8.18955	7.96682	7.71134	7.99533	8.11863	8.08769	7.80223	8.2284	8.32314	8.30856	8.07391	8.78187	8.84648	8.71584	8.43061	8.30452	8.11269	8.33311	7.418	7.24189	7.3153	6.86359	7.1721	8.32395
BC005537	79555	1450877_at	cDNA sequence BC005537	19		GO:0005622 (intracellular)		11.3235	11.0869	10.6847	11.6026	11.482	11.2185	10.4922	10.3031	10.4399	11.3451	11.1087	10.5793	11.2964	11.1169	10.8215	11.8485	11.5658	11.1469	10.053	10.3528	10.4392	11.2671	10.8545	10.8575	11.0601	11.8119	11.7706	11.68	11.5276	11.8407	11.8081	11.8417	11.807	11.7352	11.2952	11.6676	11.4489	11.2091	11.2956	10.8593	11.217	11.6397
BC006779	229003	1435454_a_at	cDNA sequence BC006779	13			GO:0003723 (RNA binding),GO:0004540 (ribonuclease activity),GO:0004872 (receptor activity)	9.76968	9.44298	10.0004	8.41665	9.16773	10.4703	11.7701	11.747	11.6639	9.36089	9.18865	9.87554	8.65786	10.0487	11.5849	8.04141	9.31642	10.5651	11.7266	11.757	11.7558	9.8955	11.2595	11.4868	11.223	8.75873	7.94003	8.4942	9.55081	7.73089	7.63888	7.82117	7.81378	7.77013	9.06724	8.20082	7.7839	8.26269	7.7436	8.4552	7.00661	7.57084
BC013672	234311	1451777_at	cDNA sequence BC013672	6			GO:0003676 (nucleic acid binding),GO:0005524 (ATP binding),GO:0008026 (ATP-dependent helicase activity)	7.77716	7.27569	7.45967	7.84582	7.44027	7.47563	9.83759	10.3472	10.442	7.22297	7.18866	6.73524	7.16378	7.60285	9.90712	7.59151	7.02709	7.26978	9.99454	10.376	10.3643	7.61842	10.2458	10.6173	10.558	7.03863	6.46596	6.60245	6.2173	6.31327	6.17051	6.39957	6.32576	6.31696	5.91498	6.59262	4.22605	4.84648	5.42511	4.50514	4.49069	6.33435
BC017133	232164	1451125_at	cDNA sequence BC017133	10				7.36777	6.92081	7.1989	7.51557	7.19511	6.796	6.10142	5.91826	6.11287	7.05814	7.1358	7.07483	7.5102	7.23909	6.61777	7.42007	7.44764	7.1603	6.69128	6.33652	6.13581	7.39882	6.97361	6.4655	6.14378	7.71352	7.77877	7.6888	7.30722	7.60405	7.82258	7.7298	7.73318	7.59266	7.10852	7.74159	7.66879	7.41706	7.55697	7.21525	7.51554	7.79339
BC017158	233913	1424812_at	cDNA sequence BC017158	2				6.38598	6.04644	5.79796	6.5683	6.41821	6.14843	5.38146	5.25362	4.86557	5.51004	6.04059	5.75605	5.80189	5.96311	5.59334	6.5988	6.87607	6.69961	5.8156	5.71021	5.40897	6.60948	6.33246	6.03898	5.95567	6.91774	6.80088	6.63829	6.5955	6.78653	6.9912	7.11179	6.5241	6.48131	6.1475	6.64407	6.2202	6.56106	6.2862	6.24322	6.58228	6.48561
BC017643	217370	1423678_at	cDNA sequence BC017643	12				8.10777	7.89561	8.04561	8.43926	8.0412	7.48985	7.6633	8.2636	8.45471	8.0077	7.9623	8.08406	8.21212	7.78611	7.73963	8.41966	8.03048	7.53826	7.6352	8.39441	8.82224	8.14922	8.0013	8.41416	8.96788	8.41696	8.19528	8.23481	7.74531	8.47792	8.3191	8.33907	8.19336	8.15219	7.47303	8.26373	7.6534	7.59	7.77956	7.59055	7.86414	8.0945
BC022623	224093	1426734_at	cDNA sequence BC022623	26				4.77683	5.20183	5.40056	4.59198	5.90302	7.36968	4.55353	4.50653	4.36764	4.47607	5.14315	5.1193	5.23731	6.42219	4.15567	4.35089	5.4648	6.55999	4.53231	4.16655	4.45687	4.75518	4.19386	4.10907	4.30079	4.16051	4.45608	4.84199	6.57523	4.30224	4.27797	4.20925	4.38243	4.4394	6.86274	4.39562	4.38665	4.79277	4.60016	5.22236	4.39005	4.7522
BC023105	207269	1425394_at	cDNA sequence BC023105	8				2.91975	2.97902	2.8342	2.94027	2.82436	3.12524	5.02623	6.87215	6.09214	2.88438	2.93068	3.08234	2.85019	2.97922	5.98881	2.98543	2.85266	2.95061	5.67801	6.10905	6.71492	2.90405	6.11185	5.81484	5.03264	2.84469	2.81679	2.9002	2.87464	3.00807	2.95204	2.68659	2.8308	2.73979	2.81624	2.94588	2.99225	2.95593	2.94347	3.02314	3.19649	2.96827
BC028528	229600	1427996_at	cDNA sequence BC028528	22				9.12132	9.19616	8.9823	9.28955	8.97285	8.98557	8.73718	9.26211	9.34478	8.90741	9.01437	8.64434	9.40631	9.24561	9.09186	9.08156	9.2089	9.16543	9.08493	9.22837	9.23992	9.53695	9.55224	9.75972	9.93173	9.22809	9.43308	9.40046	9.2612	9.33819	9.3369	9.15345	9.39221	9.3535	9.11718	9.40709	9.09233	9.11655	9.54335	9.30763	9.44749	9.56093
BC030867	217216	1434711_at	cDNA sequence BC030867	1				6.95117	6.41143	5.90489	6.65231	6.89834	6.64567	6.01674	5.70406	5.5748	6.85411	6.6307	6.21035	6.55081	6.43034	5.79713	6.67862	6.59024	6.46227	5.36548	5.88448	5.63389	6.73587	5.48013	5.67939	6.06883	6.52469	7.14799	7.30451	7.3317	7.30336	7.08141	7.11404	6.9659	6.97484	6.62626	7.19578	6.88132	6.76079	6.9498	6.63108	6.67045	6.99002
BC031781	208768	1436511_at	cDNA sequence BC031781	26				9.28353	8.86971	8.98786	8.0923	9.29322	9.30891	7.92661	8.47237	9.23121	8.80049	8.84747	8.69362	8.56284	9.00494	7.01885	7.94405	8.955	9.48525	7.68065	8.26037	8.81019	8.81865	7.38673	7.33451	7.63394	7.88356	7.59073	8.17433	9.15424	7.44483	7.7383	7.54734	7.43424	7.71605	8.67857	7.59364	8.25476	8.67561	8.81021	8.68972	7.81834	7.53163
BC039093	230761	1435087_at	cDNA sequence BC039093	14		GO:0005622 (intracellular)	GO:0003676 (nucleic acid binding),GO:0008270 (zinc ion binding)	7.94206	7.27159	7.0401	8.00855	8.19216	7.52249	5.96661	5.19761	5.63967	8.07006	7.7428	7.20317	7.70989	7.62014	6.3641	8.32638	7.82062	7.33042	5.48176	5.41313	5.28789	7.49983	6.5414	6.20902	6.36174	8.10959	8.00932	8.09572	7.64966	8.01792	8.1775	8.1188	7.88505	7.93242	7.40997	7.9349	7.6451	7.3536	7.5224	7.21111	8.16829	8.03973
BC048355	381101	1460713_at	cDNA sequence BC048355	3	GO:0008283 (cell proliferation)	GO:0005634 (nucleus)		6.53815	6.18356	6.28323	6.55186	6.48454	6.52756	6.07505	5.80504	5.6369	5.94859	6.29481	6.34111	6.65742	6.19221	6.1545	6.53196	7.01116	6.88481	6.31142	6.02357	5.99123	6.54684	6.37572	6.18581	5.77381	7.09736	7.36788	7.41037	7.24409	7.30843	7.36566	7.18519	7.1798	7.21405	7.03834	7.30144	7.04153	6.65498	6.9392	6.74778	6.76337	6.85156
BC052046	240063	1443930_at	cDNA sequence BC052046	11	GO:0006355 (regulation of transcription, DNA-dependent)	GO:0005622 (intracellular),GO:0005634 (nucleus)	GO:0003676 (nucleic acid binding),GO:0008270 (zinc ion binding),GO:0046872 (metal ion binding)	3.0429	3.27925	5.22513	3.09279	3.17388	3.16178	3.68015	4.51197	4.69128	2.83482	3.39177	4.53886	3.06493	3.04954	2.99272	3.00963	3.00627	3.57116	4.12207	4.06869	4.11479	3.03629	3.12335	3.20526	3.00972	3.0878	3.04907	3.07859	3.09218	3.09161	2.95546	3.04692	3.17913	3.07443	2.99034	3.04728	3.43328	3.1367	3.10724	3.59873	3.17559	3.01464
BC057627	330474	1457458_at	cDNA sequence BC057627	31			GO:0003676 (nucleic acid binding),GO:0008270 (zinc ion binding),GO:0046872 (metal ion binding)	6.1634	7.99035	7.72882	6.81945	6.40866	7.13389	7.67432	7.846	7.58504	8.07874	8.52642	7.56473	6.6952	7.79904	7.52172	6.7757	6.55553	6.93136	7.32597	6.98567	7.13825	6.86291	7.45625	6.70452	6.92916	7.72714	6.54682	5.26647	5.77104	5.98302	6.45092	6.5399	6.43011	6.10526	5.66244	6.59601	6.95556	7.3271	6.3931	6.83811	7.48135	6.80477
Bambi-ps1	81913	1456178_at	BMP and activin membrane-bound inhibitor, pseudogene (Xenopus laevis)	24				7.724	8.16842	9.03693	5.5107	6.97665	8.17591	10.2533	9.80038	9.49145	6.70351	7.85725	8.50424	6.83705	7.50222	9.49714	6.3624	5.7862	6.51187	8.3761	8.84628	8.56336	5.57841	7.7132	7.90547	7.60003	5.96452	6.22467	5.93682	6.30784	5.86614	6.25636	6.03829	6.47833	6.0382	5.75946	6.56281	6.35758	7.03274	6.13968	6.46218	6.03342	6.53909
Bank1	242248	1456328_at	B-cell scaffold protein with ankyrin repeats 1	7	GO:0006874 (calcium ion homeostasis),GO:0042113 (B cell activation)		GO:0005102 (receptor binding),GO:0019901 (protein kinase binding)	7.02844	6.63696	5.97451	7.74393	7.11792	6.96151	6.3188	5.7108	6.22313	6.90111	6.78192	6.49877	5.84875	5.64129	6.00749	7.07743	6.22449	6.44512	6.17987	5.59606	5.87975	6.59033	6.00261	5.93412	5.99326	6.00033	7.29459	7.29123	7.15903	7.25039	7.05986	7.2358	7.53155	7.16587	7.33721	7.34999	7.03956	7.1654	7.19564	6.78321	7.2202	7.06828
Batf	53314	1419410_at	basic leucine zipper transcription factor, ATF-like	17	GO:0006350 (transcription),GO:0006355 (regulation of transcription, DNA-dependent),GO:0019735 (antimicrobial humoral response (sensu Vertebrata))	GO:0005634 (nucleus)	GO:0003677 (DNA binding),GO:0003700 (transcription factor activity),GO:0003702 (RNA polymerase II transcription factor activity),GO:0043565 (sequence-specific DNA binding),GO:0046983 (protein dimerization activity)	8.72976	9.68779	11.0446	7.66999	8.01054	9.17267	10.6715	10.4372	10.6313	8.15557	9.55521	10.5188	7.79854	8.00919	8.90606	7.91164	6.54557	7.95822	9.9781	10.441	10.5244	7.57075	7.56259	7.78734	8.21503	6.35257	6.80001	6.72986	6.79612	6.74264	6.45624	6.73169	6.71498	6.75428	6.96953	6.74757	7.19551	7.22978	6.95516	7.79291	6.92548	7.01104
Batf2	74481	1430005_a_at	basic leucine zipper transcription factor, ATF-like 2	6	GO:0006355 (regulation of transcription, DNA-dependent)	GO:0005634 (nucleus)	GO:0003677 (DNA binding),GO:0003700 (transcription factor activity),GO:0043565 (sequence-specific DNA binding),GO:0046983 (protein dimerization activity)	6.31301	6.36967	7.12733	6.37992	6.40305	7.15396	9.97387	10.8719	10.5905	6.11241	6.23527	6.82872	6.3537	6.64657	10.2764	6.32651	6.34263	7.6224	10.7086	11.0492	10.7352	7.16158	10.8484	10.5578	10.3834	6.45086	6.19651	6.12075	6.47013	6.49021	6.35663	6.19936	6.37541	6.47894	6.64335	6.4407	5.98291	6.19217	5.9952	6.32556	6.18777	6.47724
Bax	12028	1416837_at	Bcl2-associated X protein	10	GO:0001777 (T cell homeostatic proliferation),GO:0001836 (release of cytochrome c from mitochondria),GO:0001844 (protein insertion into mitochondrial membrane during induction of apoptosis),GO:0002358 (B cell homeostatic proliferation),GO:0006915 (apoptosis),GO:0006917 (induction of apoptosis),GO:0006919 (caspase activation),GO:0006974 (response to DNA damage stimulus),GO:0007281 (germ cell devel…	GO:0005625 (soluble fraction),GO:0005737 (cytoplasm),GO:0005739 (mitochondrion),GO:0005741 (mitochondrial outer membrane),GO:0005829 (cytosol),GO:0016020 (membrane),GO:0016021 (integral to membrane),GO:0031966 (mitochondrial membrane),GO:0044445 (cytosolic part)	GO:0005515 (protein binding),GO:0046982 (protein heterodimerization activity),GO:0051434 (BH3 domain binding)	10.458	10.3561	10.4405	10.2046	10.325	10.2049	9.95541	9.82165	9.76515	10.2354	10.4319	10.4581	10.5765	10.57	10.3149	10.4388	10.1484	9.87824	9.72991	9.62592	9.59248	9.92451	9.82607	9.54348	9.65707	10.2346	10.4594	10.2207	10.2538	10.3409	10.5138	10.3616	10.281	10.2922	9.88498	10.3716	9.96504	9.6185	9.88788	9.66005	9.64906	10.4199
Bbx	70508	1430820_a_at	bobby sox homolog (Drosophila)	31	GO:0006350 (transcription),GO:0006355 (regulation of transcription, DNA-dependent)	GO:0005634 (nucleus)	GO:0003677 (DNA binding)	7.09171	7.83599	8.00658	6.58403	6.97034	6.92031	8.28729	8.42172	8.30998	7.51753	7.94116	7.82973	7.47805	7.55805	9.00938	7.00605	4.82143	5.10081	6.20728	6.30091	6.23153	4.53333	6.72047	6.0854	6.37237	5.6248	6.66335	6.26035	6.45259	7.00615	6.8411	7.18522	6.66454	6.38451	6.21035	6.72744	7.00146	7.21635	7.22144	7.1151	7.07989	7.11906
Bcl10	12042	1418970_a_at	B-cell leukemia/lymphoma 10	26	GO:0001843 (neural tube closure),GO:0002237 (response to molecule of bacterial origin),GO:0002906 (negative regulation of mature B cell apoptosis),GO:0006915 (apoptosis),GO:0006917 (induction of apoptosis),GO:0006919 (caspase activation),GO:0006968 (cellular defense response),GO:0007049 (cell cycle),GO:0007249 (I-kappaB kinase/NF-kappaB cascade),GO:0007257 (activation of JNK activity),GO:0008219 …	GO:0001772 (immunological synapse),GO:0005622 (intracellular),GO:0005634 (nucleus),GO:0005737 (cytoplasm),GO:0005764 (lysosome),GO:0005829 (cytosol),GO:0042101 (T cell receptor complex),GO:0043234 (protein complex),GO:0045121 (lipid raft),GO:0046696 (lipopolysaccharide receptor complex),GO:0048471 (perinuclear region of cytoplasm)	GO:0003713 (transcription coactivator activity),GO:0005515 (protein binding),GO:0008022 (protein C-terminus binding),GO:0008656 (caspase activator activity),GO:0019209 (kinase activator activity),GO:0031625 (ubiquitin protein ligase binding),GO:0042803 (protein homodimerization activity),GO:0043130 (ubiquitin binding),GO:0043422 (protein kinase B binding),GO:0043621 (protein self-association),GO:…	10.0873	10.3178	10.3242	9.46096	10.0426	10.5305	9.8802	9.39662	9.36756	10.0044	10.2881	10.3493	9.64478	10.0297	9.76603	9.40464	9.56609	9.97147	9.60286	9.36955	9.3191	9.58113	9.41168	9.29306	9.21464	9.16713	9.02781	9.32247	9.74063	9.1619	9.19967	9.0922	9.18605	9.15265	9.46264	9.15804	9.72005	9.95033	9.86051	9.90309	9.02536	9.41794
Bcl2	12043	1457687_at	B-cell leukemia/lymphoma 2	16	GO:0000074 (regulation of progression through cell cycle),GO:0001836 (release of cytochrome c from mitochondria),GO:0006915 (apoptosis),GO:0006916 (anti-apoptosis),GO:0006959 (humoral immune response),GO:0008284 (positive regulation of cell proliferation),GO:0008285 (negative regulation of cell proliferation),GO:0031069 (hair follicle morphogenesis),GO:0042981 (regulation of apoptosis),GO:0043066…	GO:0005634 (nucleus),GO:0005739 (mitochondrion),GO:0005741 (mitochondrial outer membrane),GO:0005783 (endoplasmic reticulum),GO:0005829 (cytosol),GO:0016020 (membrane),GO:0016021 (integral to membrane)	GO:0005515 (protein binding),GO:0042802 (identical protein binding),GO:0046982 (protein heterodimerization activity)	8.19642	7.84647	7.05443	8.59943	7.88309	7.51486	6.29362	5.10238	5.67312	7.90666	7.66409	6.99308	7.82021	7.71803	6.87325	7.96887	7.53984	7.40639	5.75492	4.99959	4.93039	7.86692	6.86724	5.69885	5.93905	7.23698	7.40817	7.45178	7.36801	7.34782	7.60513	7.45533	7.60187	7.5695	7.43799	7.55797	7.67599	7.50951	7.20782	6.97762	7.53527	7.09489
Bcl2l11	12125	1456006_at	BCL2-like 11 (apoptosis facilitator)	27	GO:0006915 (apoptosis),GO:0006917 (induction of apoptosis),GO:0042981 (regulation of apoptosis),GO:0043065 (positive regulation of apoptosis)	GO:0005624 (membrane fraction),GO:0016020 (membrane)	GO:0005515 (protein binding),GO:0008017 (microtubule binding)	8.55095	9.59203	8.11393	6.44791	8.5619	9.36339	7.8112	6.07896	5.75297	9.30024	9.29738	7.91447	8.35558	9.19085	7.29591	6.90376	8.20603	9.14544	7.2974	6.15812	5.05969	7.8499	5.97829	6.0584	6.56734	6.76472	6.9537	7.09325	8.72243	6.79629	7.17326	6.95	6.90739	6.91495	7.46027	7.08889	8.44262	8.55376	8.40246	8.95965	6.87183	6.88723
Bcl3	12051	1418133_at	B-cell leukemia/lymphoma 3	15	GO:0000060 (protein import into nucleus, translocation),GO:0000074 (regulation of progression through cell cycle),GO:0002268 (follicular dendritic cell differentiation),GO:0002315 (marginal zone B cell differentiation),GO:0002455 (humoral immune response mediated by circulating immunoglobulin),GO:0002467 (germinal center formation),GO:0006350 (transcription),GO:0006355 (regulation of transcriptio…	GO:0005634 (nucleus),GO:0043234 (protein complex)	GO:0003677 (DNA binding),GO:0003700 (transcription factor activity),GO:0005515 (protein binding)	8.34401	9.47632	8.8958	6.03421	7.24895	8.91436	9.76493	10.0262	9.9422	8.17724	9.82138	9.29476	6.78363	8.19919	8.36522	5.89011	7.70725	9.74679	10.2342	9.71097	9.68862	9.12024	8.59206	9.03443	9.79651	7.27965	6.39613	6.8672	7.53089	6.50287	6.54271	6.55208	6.1822	6.0699	6.21381	6.40655	6.61871	7.68178	7.10829	8.41255	5.91559	6.44749
Bcor	71458	1429438_at	Bcl6 interacting corepressor	26	GO:0006350 (transcription),GO:0006355 (regulation of transcription, DNA-dependent),GO:0016568 (chromatin modification)	GO:0005634 (nucleus)	GO:0003677 (DNA binding),GO:0003700 (transcription factor activity)	6.33062	7.58265	6.40545	4.82634	4.88267	6.8821	5.56486	4.81046	4.68938	5.91324	7.5776	6.44844	4.70514	5.69934	4.66726	4.47126	5.64025	7.36898	5.57678	4.45192	4.17604	5.58069	4.18904	4.28195	4.74914	5.00289	4.66526	4.57445	5.15548	4.69566	4.89041	4.77338	4.53085	4.48055	4.80028	4.4701	4.70015	6.78571	5.21904	6.80605	4.96582	4.71248
Bfar	67118	1426488_at	bifunctional apoptosis regulator	6	GO:0006915 (apoptosis),GO:0006916 (anti-apoptosis)	GO:0005624 (membrane fraction),GO:0005783 (endoplasmic reticulum),GO:0005887 (integral to plasma membrane),GO:0016020 (membrane),GO:0016021 (integral to membrane)	GO:0003674 (molecular_function),GO:0005198 (structural molecule activity),GO:0005515 (protein binding),GO:0008270 (zinc ion binding),GO:0046872 (metal ion binding)	7.04966	6.58491	6.93775	7.10945	6.73652	6.60675	8.73758	9.65168	9.55395	6.57868	6.63913	6.81874	6.73253	6.83899	7.94958	6.80628	6.99798	7.25841	9.61606	10.0528	9.91239	7.32142	9.04469	9.4979	9.06742	7.16946	6.15327	6.5038	6.30691	6.44483	6.62418	6.52131	6.62596	6.44583	6.37032	6.48797	6.59583	6.19961	6.67522	6.61193	6.31466	6.62607
Bid	12122	1417045_at	BH3 interacting domain death agonist	30	GO:0001836 (release of cytochrome c from mitochondria),GO:0006915 (apoptosis),GO:0008625 (induction of apoptosis via death domain receptors),GO:0008637 (apoptotic mitochondrial changes),GO:0042981 (regulation of apoptosis),GO:0043065 (positive regulation of apoptosis)	GO:0005624 (membrane fraction),GO:0005737 (cytoplasm),GO:0005739 (mitochondrion),GO:0005829 (cytosol)	GO:0005123 (death receptor binding),GO:0005515 (protein binding)	10.0352	9.45946	9.56383	9.84266	9.94518	9.34994	9.11203	8.7257	8.83284	9.71895	9.66471	9.34317	9.78758	9.41285	9.35236	10.3993	8.6219	8.66216	9.02322	9.58647	9.77962	9.27823	9.40667	10.163	10.3622	9.15532	10.3547	10.2886	9.7574	9.95585	10.0837	10.0382	10.0926	9.9361	9.39738	10.2107	9.61837	9.35585	9.54416	9.36232	9.57011	10.1843
Bin1	30948	1425532_a_at	bridging integrator 1	2	GO:0006897 (endocytosis),GO:0007049 (cell cycle),GO:0007275 (multicellular organismal development),GO:0008283 (cell proliferation),GO:0030100 (regulation of endocytosis),GO:0030154 (cell differentiation),GO:0045786 (negative regulation of progression through cell cycle),GO:0048488 (synaptic vesicle endocytosis)	GO:0005634 (nucleus),GO:0005737 (cytoplasm),GO:0015629 (actin cytoskeleton)	GO:0005515 (protein binding)	9.11701	9.17163	8.99625	9.13333	9.46875	9.30607	8.74755	8.18185	7.58514	9.18948	9.3298	9.06274	9.37678	9.26226	9.09249	9.57042	9.1209	9.05571	8.67674	8.14879	7.86012	9.05959	8.88231	8.25566	7.95985	9.23573	9.51511	9.49567	9.38179	9.50774	9.54013	9.41489	9.37233	9.37191	9.04131	9.5672	9.54762	8.71145	8.83351	8.84973	8.98534	9.5538
Birc1b	17948	1460273_a_at	baculoviral IAP repeat-containing 1b	12	GO:0006915 (apoptosis),GO:0006916 (anti-apoptosis),GO:0006952 (defense response)	GO:0005622 (intracellular)	GO:0000166 (nucleotide binding),GO:0005524 (ATP binding),GO:0017111 (nucleoside-triphosphatase activity)	7.74857	7.64006	7.81638	8.094	7.56841	7.31013	7.98416	8.83539	9.08687	7.52337	7.53962	7.95263	7.64502	7.69414	7.88396	7.64637	8.06314	7.85902	7.93478	8.52337	8.77445	8.05327	8.43968	8.6423	8.65257	8.14602	7.82224	7.94244	7.5295	7.90982	7.86344	7.86224	7.77886	7.80418	7.48665	7.94842	7.16221	7.44926	7.84568	7.44599	7.06575	8.01263
Birc3	11796	1421392_a_at	baculoviral IAP repeat-containing 3	25	GO:0006915 (apoptosis),GO:0006916 (anti-apoptosis),GO:0007166 (cell surface receptor linked signal transduction),GO:0042981 (regulation of apoptosis)	GO:0005622 (intracellular)	GO:0005515 (protein binding),GO:0008270 (zinc ion binding),GO:0046872 (metal ion binding)	11.0968	11.5067	11.681	8.76792	10.44	11.1921	11.9377	11.9488	12.0199	10.6013	11.065	11.4029	9.87503	11.1115	11.6696	8.33962	10.2459	11.4778	12.1442	11.837	11.7777	11.3241	11.8467	11.4744	11.3546	9.17693	8.24063	9.11214	10.368	8.13037	8.14284	8.0923	8.30205	8.54338	9.84377	8.46273	9.08053	9.9049	9.66356	10.4055	7.69965	8.84857
Birc5	11799	1424278_a_at	baculoviral IAP repeat-containing 5	1	GO:0000086 (G2/M transition of mitotic cell cycle),GO:0000226 (microtubule cytoskeleton organization and biogenesis),GO:0000910 (cytokinesis),GO:0006915 (apoptosis),GO:0006916 (anti-apoptosis),GO:0007049 (cell cycle),GO:0007067 (mitosis),GO:0009790 (embryonic development),GO:0031503 (protein complex localization),GO:0031536 (positive regulation of exit from mitosis),GO:0031577 (spindle checkpoint…	GO:0000775 (chromosome, pericentric region),GO:0005622 (intracellular),GO:0005634 (nucleus),GO:0005694 (chromosome),GO:0005737 (cytoplasm),GO:0005814 (centriole),GO:0005829 (cytosol),GO:0005876 (spindle microtubule),GO:0005881 (cytoplasmic microtubule),GO:0030496 (midbody),GO:0031021 (interphase microtubule organizing center),GO:0043234 (protein complex)	GO:0004866 (endopeptidase inhibitor activity),GO:0004869 (cysteine protease inhibitor activity),GO:0005515 (protein binding),GO:0008017 (microtubule binding),GO:0008270 (zinc ion binding),GO:0015631 (tubulin binding),GO:0042803 (protein homodimerization activity),GO:0043027 (caspase inhibitor activity),GO:0046872 (metal ion binding),GO:0046982 (protein heterodimerization activity),GO:0048037 (cof…	9.84284	9.66924	9.27117	9.52772	9.7553	9.41774	8.3117	7.22497	6.71083	9.51257	9.63488	9.29451	9.6591	9.53862	8.93964	9.87019	8.86469	9.0197	8.5542	7.82362	7.48604	9.21502	8.908	8.34216	7.71759	8.96647	10.6817	10.587	10.5215	10.4037	10.4755	10.4497	10.642	10.6582	10.3036	10.7307	10.4532	9.93468	10.3749	9.99052	10.0509	10.4783
Birc6	12211	1419563_at	baculoviral IAP repeat-containing 6	8	GO:0006464 (protein modification),GO:0006512 (ubiquitin cycle),GO:0006916 (anti-apoptosis),GO:0008284 (positive regulation of cell proliferation),GO:0016567 (protein ubiquitination)	GO:0005622 (intracellular),GO:0005624 (membrane fraction)	GO:0004840 (),GO:0004842 (ubiquitin-protein ligase activity)	5.85276	5.9435	5.80504	5.96387	5.87385	5.87365	6.08639	6.36481	6.50525	5.97803	5.73449	5.89231	5.92088	5.96815	6.15041	5.75178	5.93114	5.91183	6.16608	6.3284	6.67238	5.86257	6.22226	6.32482	6.29021	6.08564	6.00321	5.78026	5.93696	6.06071	5.95031	5.7771	5.94706	6.00439	5.74321	5.92179	5.92983	6.05018	6.10374	5.9059	5.94589	5.81974
Blvra	109778	1428580_at	biliverdin reductase A	5	GO:0006118 (electron transport),GO:0042167 (heme catabolic process)	GO:0005625 (soluble fraction)	GO:0000166 (nucleotide binding),GO:0004074 (biliverdin reductase activity),GO:0008270 (zinc ion binding),GO:0016491 (oxidoreductase activity),GO:0046872 (metal ion binding)	10.7968	10.8061	10.6413	11.0191	10.8394	10.5738	10.0505	9.60943	9.49515	10.6995	10.7581	10.5423	11.1364	10.9848	10.5622	11.0055	10.5942	10.5371	10.4105	9.76198	9.65844	10.9005	10.564	10.0304	9.84149	10.6895	10.8677	10.808	10.7166	10.8596	10.8215	10.8259	10.8648	10.8899	10.5083	10.8969	10.7269	10.3378	10.6739	10.3632	10.3841	11.0503
Bmyc	107771	1428669_at	brain expressed myelocytomatosis oncogene	3	GO:0000074 (regulation of progression through cell cycle),GO:0006355 (regulation of transcription, DNA-dependent),GO:0009987 (cellular process),GO:0050875 ()	GO:0005634 (nucleus),GO:0005819 (spindle)	GO:0003677 (DNA binding),GO:0003700 (transcription factor activity),GO:0005515 (protein binding)	7.3498	6.92015	5.79034	7.32017	7.38286	7.13593	6.26501	5.68952	5.64192	7.01725	6.88377	6.12833	7.24053	7.0213	6.45739	7.44339	7.68581	7.39473	5.48731	5.74487	6.00264	7.31379	6.85653	6.12182	5.81369	7.70082	7.63082	7.44451	7.24339	7.94136	7.65509	7.92997	7.60247	7.47424	7.271	7.46936	7.25937	6.86107	7.26758	6.9353	7.15782	7.41729
Bnip3	12176	1422470_at	BCL2/adenovirus E1B interacting protein 1, NIP3	12	GO:0001666 (response to hypoxia),GO:0006309 (DNA fragmentation during apoptosis),GO:0006338 (chromatin remodeling),GO:0006800 (oxygen and reactive oxygen species metabolic process),GO:0006915 (apoptosis),GO:0006916 (anti-apoptosis),GO:0006917 (induction of apoptosis),GO:0008219 (cell death),GO:0008634 (negative regulation of survival gene product activity),GO:0042981 (regulation of apoptosis),GO:…	GO:0005634 (nucleus),GO:0005635 (nuclear envelope),GO:0005654 (nucleoplasm),GO:0005737 (cytoplasm),GO:0005739 (mitochondrion),GO:0005740 (mitochondrial envelope),GO:0016020 (membrane),GO:0016021 (integral to membrane),GO:0030425 (dendrite),GO:0031307 (integral to mitochondrial outer membrane),GO:0031966 (mitochondrial membrane)	GO:0005515 (protein binding),GO:0042803 (protein homodimerization activity),GO:0046982 (protein heterodimerization activity)	8.64741	8.43956	8.62939	9.13048	8.46804	8.37759	7.96587	8.33227	8.50539	8.45901	8.65005	8.42722	8.35812	8.26386	7.95328	8.65916	9.55885	9.38114	8.68314	9.01244	9.12375	8.86929	8.5923	8.47356	8.80681	9.68909	9.1319	9.1044	8.98676	9.07315	9.02379	9.01406	9.09088	8.9562	8.62576	9.01919	9.3851	9.70902	9.44719	9.0068	9.72371	8.86454
Braf	109880	1425693_at	Braf transforming gene	9	GO:0006355 (regulation of transcription, DNA-dependent),GO:0006468 (protein amino acid phosphorylation),GO:0006916 (anti-apoptosis),GO:0007165 (signal transduction),GO:0007242 (intracellular signaling cascade),GO:0009887 (organ morphogenesis),GO:0009987 (cellular process),GO:0050875 ()	GO:0005622 (intracellular),GO:0005634 (nucleus),GO:0005737 (cytoplasm),GO:0005886 (plasma membrane)	GO:0000166 (nucleotide binding),GO:0003677 (DNA binding),GO:0004672 (protein kinase activity),GO:0004674 (protein serine/threonine kinase activity),GO:0004713 (protein-tyrosine kinase activity),GO:0005057 (receptor signaling protein activity),GO:0005524 (ATP binding),GO:0008270 (zinc ion binding),GO:0016301 (kinase activity),GO:0016740 (transferase activity),GO:0019992 (diacylglycerol binding),GO…	4.79523	5.09592	5.59242	4.94032	4.99073	5.22491	6.0822	5.95466	5.9811	4.98366	5.2262	4.86038	4.79885	5.24231	5.65544	4.94623	4.99149	5.16437	5.71917	6.10426	6.31602	4.82512	5.07843	5.86201	5.42149	4.93681	4.88589	5.22461	5.25213	4.99583	5.02661	5.02074	4.82636	4.94132	5.0026	4.95574	4.67548	5.2594	5.07179	5.35371	4.77549	5.12015
Brca2	12190	1419076_a_at	breast cancer 2	3	GO:0000074 (regulation of progression through cell cycle),GO:0000724 (double-strand break repair via homologous recombination),GO:0006281 (DNA repair),GO:0006325 (establishment and/or maintenance of chromatin architecture),GO:0006338 (chromatin remodeling),GO:0006974 (response to DNA damage stimulus),GO:0007090 (regulation of S phase of mitotic cell cycle),GO:0007093 (mitotic checkpoint),GO:00454…	GO:0005615 (extracellular space),GO:0005634 (nucleus),GO:0005737 (cytoplasm),GO:0030141 (secretory granule)	GO:0003697 (single-stranded DNA binding),GO:0005515 (protein binding),GO:0016563 (transcriptional activator activity)	6.53775	6.2159	5.52823	6.94496	6.54086	6.12042	5.48456	5.29117	5.147	6.67698	6.33929	6.10363	6.2546	6.12356	5.63089	6.3679	6.69932	6.69465	5.46565	4.81155	5.24831	6.84501	5.80294	5.02834	5.70014	6.74838	7.01539	7.08037	6.8694	6.82737	6.93632	7.08674	7.22296	7.20345	6.99081	7.12287	7.22581	7.39564	7.18256	6.62027	7.26696	6.54097
Bst1	12182	1449453_at	bone marrow stromal cell antigen 1	9	GO:0006952 (defense response)	GO:0005615 (extracellular space),GO:0005886 (plasma membrane),GO:0016020 (membrane)	GO:0003953 (NAD+ nucleosidase activity),GO:0016787 (hydrolase activity),GO:0048503 (GPI anchor binding)	5.82832	5.80431	6.09702	5.899	5.8376	5.71823	6.98723	8.72572	8.90686	5.35292	5.80697	6.05332	5.48064	5.36926	6.5189	5.83932	6.11932	6.3983	7.50969	8.16046	8.53727	6.54577	7.15259	7.27188	7.07505	6.1992	6.46984	6.27946	6.20093	5.97211	6.11428	6.14761	6.09624	5.44493	5.66177	6.15584	5.48577	5.59347	5.64238	5.22873	5.57104	6.07773
Btf3l4	70533	1451222_at	basic transcription factor 3-like 4	5				7.741	7.49932	7.29596	7.84379	7.61452	7.39532	6.66602	6.04587	6.05826	7.33669	7.56095	7.1353	7.72303	7.45136	6.86384	7.77267	7.51265	7.52806	6.57008	6.13732	6.14253	7.29683	6.94659	6.41988	5.9953	7.73135	7.76135	7.71147	7.56568	7.57985	7.5666	7.69853	7.70258	7.30263	7.2426	7.75699	7.46719	7.53803	7.52898	7.31679	7.6111	7.68941
Btg2	12227	1416250_at	B-cell translocation gene 2, anti-proliferative	27	GO:0006281 (DNA repair),GO:0006350 (transcription),GO:0006355 (regulation of transcription, DNA-dependent),GO:0006479 (protein amino acid methylation),GO:0006974 (response to DNA damage stimulus),GO:0008285 (negative regulation of cell proliferation),GO:0009952 (anterior/posterior pattern formation),GO:0030182 (neuron differentiation),GO:0043066 (negative regulation of apoptosis)		GO:0003700 (transcription factor activity),GO:0005515 (protein binding)	10.5316	9.60716	9.3497	9.33689	11.3215	8.81079	7.93902	7.46314	7.02153	9.76916	9.34813	8.55278	11.2364	8.6746	7.79561	7.46019	9.55842	7.38889	6.82401	7.5247	7.43816	8.00387	6.55621	6.46747	7.57045	6.50277	6.6044	10.1828	9.11034	6.9786	6.67724	6.56161	6.67757	8.71891	8.68865	6.75753	9.31911	7.85525	9.3655	7.63182	5.56691	6.98082
Bub1	12235	1424046_at	budding uninhibited by benzimidazoles 1 homolog (S. cerevisiae)	1	GO:0006468 (protein amino acid phosphorylation),GO:0007049 (cell cycle),GO:0007067 (mitosis),GO:0051301 (cell division)	GO:0000775 (chromosome, pericentric region),GO:0000776 (kinetochore),GO:0005634 (nucleus)	GO:0000166 (nucleotide binding),GO:0004672 (protein kinase activity),GO:0004674 (protein serine/threonine kinase activity),GO:0005524 (ATP binding),GO:0016301 (kinase activity),GO:0016740 (transferase activity)	8.64845	8.48096	7.77137	8.76043	8.52183	8.3939	7.10079	5.22338	5.09655	8.39277	8.34762	7.95915	8.34535	8.1354	7.28128	8.61028	8.33131	8.48949	6.88622	5.71772	5.21151	8.00939	7.7119	6.55146	5.40413	8.37538	9.16956	9.34613	9.12682	8.89718	9.00606	9.21822	9.17457	9.06736	8.86456	9.28039	9.11039	9.17777	9.42723	9.04133	9.16117	8.62196
Bub1b	12236	1416961_at	budding uninhibited by benzimidazoles 1 homolog, beta (S. cerevisiae)	3	GO:0006468 (protein amino acid phosphorylation),GO:0006915 (apoptosis),GO:0007049 (cell cycle),GO:0007051 (spindle organization and biogenesis),GO:0007067 (mitosis),GO:0007093 (mitotic checkpoint),GO:0008283 (cell proliferation),GO:0045786 (negative regulation of progression through cell cycle),GO:0048015 (phosphoinositide-mediated signaling),GO:0051301 (cell division)	GO:0000776 (kinetochore),GO:0000940 (outer kinetochore of condensed chromosome),GO:0005634 (nucleus),GO:0005680 (anaphase-promoting complex),GO:0005737 (cytoplasm),GO:0051233 (spindle midzone)	GO:0000166 (nucleotide binding),GO:0004672 (protein kinase activity),GO:0004674 (protein serine/threonine kinase activity),GO:0005515 (protein binding),GO:0005524 (ATP binding),GO:0016301 (kinase activity),GO:0016740 (transferase activity)	7.88825	7.91173	7.18709	8.08052	7.90104	7.6301	6.23557	5.62856	5.18529	7.8182	7.82885	7.24513	7.95765	7.86723	7.01959	7.96494	7.42692	7.37886	5.84617	5.72623	5.88262	7.50158	6.802	6.03177	5.44659	7.47515	8.31577	8.63605	8.31996	8.14574	8.30207	8.29282	8.22682	8.22354	7.90447	8.50096	8.25203	8.15598	8.77581	8.07798	8.28881	8.11783
C030025P15Rik	320895	1455609_at	RIKEN cDNA C030025P15 gene	1				6.92292	7.05378	6.80627	7.24582	7.25734	7.06051	6.30361	5.40031	5.54333	7.62676	7.47196	7.32188	6.98714	6.89361	6.29173	7.14109	7.05276	6.93878	5.91536	5.40631	5.37641	6.71962	6.44063	6.21987	5.82144	7.13604	7.9097	7.97259	7.91259	7.90649	8.19864	7.8959	7.72468	7.88299	7.35748	7.87476	8.10083	7.83087	7.79594	7.65391	8.16052	7.58886
C030044C12Rik	77483	1429097_at	RIKEN cDNA C030044C12 gene	16				8.18925	7.77624	6.34256	8.7051	8.02393	7.6474	6.13498	5.40506	5.22412	8.0353	7.7432	6.87998	7.99796	7.8368	6.64306	8.29111	7.87669	7.77106	6.82607	5.24864	5.31047	8.55209	7.41694	6.26746	5.46894	7.91903	8.0949	8.11389	7.99988	8.20305	8.34412	8.20334	8.37076	8.27604	8.02612	8.27859	7.89226	7.87383	8.26511	7.96542	7.95531	8.38707
C030046G05	327885	1436196_at	hypothetical protein C030046G05	25				10.6757	10.7465	10.2566	7.68102	9.91201	11.1341	10.2859	9.71464	9.2965	10.2683	10.7595	10.3126	8.90059	10.1213	10.1781	7.52136	9.16805	10.567	10.2816	9.81436	9.1897	9.58221	9.73712	9.29193	8.79169	7.38425	7.32279	8.14722	9.30969	7.24096	7.07597	7.44066	7.42534	7.49586	9.05172	7.44773	8.76305	10.1376	9.33544	10.1828	7.56625	7.54478
C130006E23	331563	1455206_at	Hypothetical protein C130006E23	29				10.215	9.56251	9.6245	9.79648	9.87386	9.98752	10.1737	9.56067	9.49366	9.29298	9.39769	9.44313	9.56055	9.4666	9.95585	10.0212	9.69546	9.53988	10.0397	10.0083	9.82742	9.78739	9.8857	9.80367	9.73632	9.71151	9.91523	9.72833	9.78654	9.79042	10.1319	10.0724	9.95898	9.82605	9.54672	9.85975	8.8645	9.16393	9.5817	9.17632	9.24379	9.79698
C130050O18Rik	319772	1441516_a_at	RIKEN cDNA C130050O18 gene	32				4.85861	4.63172	4.63097	5.33063	4.94777	4.47764	4.42757	5.18819	5.11055	4.74467	4.30542	4.24307	4.95574	4.69369	4.20484	5.26287	6.0414	5.51107	5.20029	5.1777	5.36531	5.44308	4.24241	4.18448	4.91029	6.17158	6.66279	7.01035	6.26025	6.43613	7.00722	6.98155	6.54784	6.42741	5.95336	6.83109	6.08167	5.66904	5.86513	4.95005	6.08801	6.6121
C130057M05Rik	399581	1457334_at	RIKEN cDNA C130057M05 gene	25				6.69914	6.35586	6.83539	6.40518	6.90333	5.92666	6.78164	6.57123	7.1066	7.14943	6.60065	6.41655	6.7286	5.84355	6.75981	6.04606	6.95423	5.64038	6.03026	6.78855	7.6516	5.914	5.88477	6.86604	7.00899	5.86975	5.49009	6.17089	5.79222	5.40195	5.53531	5.75987	5.69977	5.59246	5.96349	5.63142	6.55462	6.3835	7.37953	6.21696	6.30318	5.70312
C1qbp	12261	1448274_at	complement component 1, q subcomponent binding protein	4	GO:0006955 (immune response),GO:0006956 (complement activation)	GO:0005739 (mitochondrion),GO:0005759 (mitochondrial matrix),GO:0005886 (plasma membrane)	GO:0005515 (protein binding)	9.56219	9.32361	9.19921	9.65354	9.5641	9.27992	8.61365	8.22739	8.22302	9.45089	9.45616	9.24523	9.41946	9.20048	8.79066	9.70389	10.1288	9.91496	9.09085	8.70141	8.47502	9.49358	9.27362	8.82855	8.46584	10.2553	9.87257	9.79085	9.58816	9.9062	9.94937	10.0027	9.79109	9.64143	9.33514	9.58655	9.30836	8.75974	9.31268	8.88562	8.76901	9.34129
C1qdc2	67389	1417393_a_at	C1q domain containing 2	7		GO:0005615 (extracellular space)		8.85206	8.7238	8.96555	9.15982	8.99499	8.86006	8.50315	8.36132	8.06755	8.87067	9.02232	8.92252	8.9598	8.98882	8.79376	9.12097	9.41305	9.25351	9.19385	8.79937	8.53406	9.22337	9.19234	8.95246	8.95705	9.47983	9.4219	9.39525	9.36024	9.6293	9.64949	9.63068	9.26386	9.3059	8.83041	9.41548	9.50262	9.05999	9.25073	8.93214	9.33604	9.52954
C230078M08Rik	319749	1435564_at	RIKEN cDNA C230078M08 gene	3				5.64044	5.23004	5.04357	5.58432	5.62308	5.13291	4.70267	4.77724	4.91906	5.49136	5.79377	5.18878	5.83807	5.57659	4.49792	5.96377	5.20884	4.93475	5.0126	4.56458	4.95588	5.33953	5.16157	4.54739	4.51703	5.47407	6.97463	7.06614	6.47364	6.87523	6.90899	7.24307	6.87834	6.60148	6.27474	7.00638	6.16371	6.18045	6.45106	6.07641	6.29656	6.51786
C330008K14Rik	77619	1436194_at	RIKEN cDNA C330008K14 gene	12				5.28157	5.0933	5.36049	5.17449	5.09825	4.83793	5.02095	5.25851	5.12438	5.21024	5.35697	5.14866	5.2825	5.10163	5.15909	5.13779	6.03837	5.83119	6.0512	5.91529	5.68801	5.78286	5.51724	5.54084	5.4801	5.98454	5.49081	5.62566	5.30741	5.51717	5.9718	5.99581	5.31101	5.15648	4.88869	5.47232	5.00742	5.94279	5.68672	5.61949	5.84574	5.38559
C530044N13Rik	223978	1426669_at	RIKEN cDNA C530044N13 gene	14			GO:0016787 (hydrolase activity)	7.83586	7.29548	6.85113	7.24334	7.68175	7.38571	6.45317	6.8635	7.07951	7.41811	7.47906	7.22446	7.42134	7.51234	6.89927	7.85083	7.45204	7.30994	6.75383	6.80806	7.1504	7.56787	7.32537	7.12652	7.05557	7.49069	7.73646	7.70778	7.38013	7.59594	7.57873	7.76344	7.53317	7.496	7.21136	7.56921	7.22833	6.79131	7.45114	6.9857	7.32368	7.82876
C78513	30865	1443414_at	EST C78513	15				6.57634	7.99268	9.02152	4.86763	7.67934	8.50029	9.17979	9.14097	8.90208	6.73334	7.70802	8.91039	7.34103	8.16422	8.76018	5.08255	6.12684	7.64407	7.26755	7.10802	7.2247	6.5187	6.4274	5.75763	5.69584	4.8286	5.05871	5.42791	6.89946	5.05251	4.80125	4.86733	4.71925	5.00128	6.51326	5.01079	5.65089	6.9433	6.62633	7.65902	5.46024	5.24505
C79407	217653	1434767_at	expressed sequence C79407	3		GO:0005634 (nucleus)	GO:0003677 (DNA binding)	7.4179	6.64653	6.13953	7.30601	7.18672	6.50473	4.66281	3.68867	3.74405	7.17325	6.90593	6.43598	7.15679	6.85541	4.98831	7.23597	6.88279	6.70183	4.49387	4.59322	4.11931	6.94643	5.39187	4.66985	4.53161	7.00558	7.92083	8.07884	7.90493	7.53613	7.76105	7.66689	7.6569	7.65628	7.60635	7.97986	7.56018	7.54203	8.08627	7.47339	7.76204	7.50838
C80258	97540	1440513_at	expressed sequence C80258	13				6.0309	6.75344	6.84194	5.69496	5.75217	6.47973	7.11296	7.48319	7.60332	5.94805	6.26245	6.50034	5.61674	5.80066	7.01885	5.42995	5.89593	6.71498	6.7498	7.32823	7.16802	6.08294	6.95532	7.14894	6.77109	5.81657	4.94651	5.45854	5.16021	5.18996	4.9108	5.00428	4.95683	5.13009	5.57836	4.80194	4.54678	5.41957	5.74568	5.72395	5.29589	5.04158
C86595	97935	1458409_at	expressed sequence C86595	9				7.55213	6.01391	6.86493	7.18428	7.60768	6.76291	7.23911	8.46948	8.80919	8.09089	6.47477	7.41248	7.10049	7.04415	7.26951	6.49583	8.34547	7.111	7.23954	7.85084	8.24618	7.90851	7.5586	7.33372	8.20066	8.2591	6.74255	7.20028	7.38584	6.73084	7.28862	7.77247	6.87841	7.18703	6.83565	6.76379	7.50675	7.00504	7.73912	6.56016	6.27585	5.93534
Cacybp	12301	1452047_at	calcyclin binding protein	9	GO:0006512 (ubiquitin cycle),GO:0008150 (biological_process)	GO:0005634 (nucleus),GO:0005641 (nuclear envelope lumen),GO:0005737 (cytoplasm)	GO:0005515 (protein binding)	9.69596	9.75734	9.77753	9.85211	9.63186	9.68309	10.4284	10.6334	10.5004	9.59164	9.72395	9.44926	9.90814	9.93842	10.4304	9.88788	10.0156	10.0239	10.4098	10.7507	10.7694	9.73395	10.3925	10.7235	10.5769	10.0994	9.75384	9.61861	9.49503	9.8163	9.7694	9.70359	9.76989	9.68356	9.31642	9.64438	9.56746	9.28845	9.281	9.28018	9.11319	9.58468
Calm2	12314	1423807_a_at	calmodulin 2	5	GO:0007049 (cell cycle),GO:0007186 (G-protein coupled receptor protein signaling pathway)	GO:0005737 (cytoplasm),GO:0005886 (plasma membrane)	GO:0005509 (calcium ion binding),GO:0005515 (protein binding)	12.783	12.7572	12.67	12.5182	12.6569	12.64	12.3913	11.8542	11.5644	12.6894	12.6303	12.6137	12.7365	12.6947	12.4375	12.8247	12.5513	12.6221	12.415	12.0256	11.6826	12.7493	12.3327	11.9525	11.5773	12.6881	12.9782	12.9077	12.8851	12.8918	12.9325	12.8565	12.9762	12.9522	12.7303	12.9512	12.8459	12.9875	12.9596	12.7161	12.973	12.8794
Camk1	52163	1417604_at	calcium/calmodulin-dependent protein kinase I	18	GO:0006468 (protein amino acid phosphorylation),GO:0006913 (nucleocytoplasmic transport),GO:0007165 (signal transduction),GO:0007275 (multicellular organismal development),GO:0007399 (nervous system development),GO:0030154 (cell differentiation)	GO:0005634 (nucleus),GO:0005954 (calcium- and calmodulin-dependent protein kinase complex)	GO:0000166 (nucleotide binding),GO:0003824 (catalytic activity),GO:0004672 (protein kinase activity),GO:0004674 (protein serine/threonine kinase activity),GO:0004685 (calcium- and calmodulin-dependent protein kinase activity),GO:0004713 (protein-tyrosine kinase activity),GO:0005515 (protein binding),GO:0005516 (calmodulin binding),GO:0005524 (ATP binding),GO:0016301 (kinase activity),GO:0016740 (…	9.84604	9.70974	9.42317	9.73564	10.0568	9.8146	9.38696	7.9311	7.40664	9.70988	9.87179	9.69502	10.2728	10.0217	9.86826	10.2471	8.32766	8.28025	8.33418	8.13685	7.86994	8.81598	8.74942	8.33981	8.18454	8.65339	9.37962	9.38331	9.1233	9.16213	8.91155	9.28376	9.241	9.17114	8.8	9.53561	9.66537	9.32668	9.50312	9.23883	9.19044	10.1441
Camkk2	207565	1424474_a_at	calcium/calmodulin-dependent protein kinase kinase 2, beta	21	GO:0006468 (protein amino acid phosphorylation),GO:0046777 (protein amino acid autophosphorylation)		GO:0000166 (nucleotide binding),GO:0004672 (protein kinase activity),GO:0004674 (protein serine/threonine kinase activity),GO:0004685 (calcium- and calmodulin-dependent protein kinase activity),GO:0005509 (calcium ion binding),GO:0005516 (calmodulin binding),GO:0005524 (ATP binding),GO:0016301 (kinase activity),GO:0016740 (transferase activity)	8.18706	8.76007	8.80334	8.03644	7.97647	8.37977	9.04742	8.85145	8.38543	7.98406	8.88011	8.58175	8.09567	8.3334	8.24842	8.17209	8.30134	8.83463	9.13822	8.78618	8.47115	8.56855	9.0005	8.6881	8.69242	8.47406	7.79777	7.75371	7.53553	7.67268	7.7585	7.75772	7.4895	7.5084	7.02359	7.87635	6.82866	7.38408	7.04138	7.81041	7.46254	7.62309
Car13	71934	1421307_at	carbonic anhydrase 13	13	GO:0006730 (one-carbon compound metabolic process)		GO:0004089 (carbonate dehydratase activity),GO:0008270 (zinc ion binding),GO:0016829 (lyase activity),GO:0046872 (metal ion binding)	7.85568	8.13753	8.97207	7.2879	7.55194	8.39973	10.1201	10.7154	10.8039	7.67905	8.05958	8.58331	7.38945	8.06649	9.32517	6.97336	7.10986	8.35856	10.3172	10.6481	10.8642	7.7748	9.21586	9.72941	9.89382	6.76624	6.90639	6.95967	7.34221	6.62904	6.98839	6.88473	6.79302	6.6151	6.83324	6.79097	6.92615	7.54408	7.64112	7.71613	7.1437	6.80836
Car2	12349	1448752_at	carbonic anhydrase 2	8	GO:0002009 (morphogenesis of an epithelium),GO:0006730 (one-carbon compound metabolic process),GO:0015670 (carbon dioxide transport),GO:0046903 (secretion)	GO:0005737 (cytoplasm)	GO:0004089 (carbonate dehydratase activity),GO:0008270 (zinc ion binding),GO:0016829 (lyase activity),GO:0046872 (metal ion binding)	4.78259	4.98485	5.23143	4.76164	4.87225	4.85446	5.64222	6.90283	7.75583	4.87219	4.76465	4.93833	4.75302	4.4883	5.43153	4.68548	5.08853	5.77415	7.65042	7.82691	8.16961	5.33242	6.16547	7.03091	6.7489	4.93183	4.934	4.82216	5.21012	5.28646	4.95472	4.85934	5.00539	5.00984	4.90512	4.93121	5.04631	5.14332	5.00651	5.23862	4.75159	4.9848
Carhsp1	52502	1415975_at	calcium regulated heat stable protein 1	8	GO:0006355 (regulation of transcription, DNA-dependent)		GO:0003676 (nucleic acid binding),GO:0003677 (DNA binding),GO:0005515 (protein binding)	7.83664	7.90116	7.91494	7.98558	7.81914	8.28416	8.92131	9.46932	9.68136	7.61582	8.21614	8.27709	7.77878	8.15085	8.89197	7.89103	7.22342	7.59332	8.52493	9.02883	9.43329	7.83048	8.76417	8.82912	9.16996	7.29955	7.87133	7.89225	7.66351	7.88511	7.84646	8.10136	7.93685	7.84331	7.65226	8.07387	7.22754	7.30279	7.2629	7.09078	6.88526	7.57101
Casp1	12362	1449265_at	caspase 1	6	GO:0001666 (response to hypoxia),GO:0006508 (proteolysis),GO:0006915 (apoptosis),GO:0006917 (induction of apoptosis),GO:0008219 (cell death),GO:0016485 (protein processing),GO:0042981 (regulation of apoptosis)	GO:0005576 (extracellular region),GO:0005622 (intracellular),GO:0005737 (cytoplasm)	GO:0005515 (protein binding),GO:0008233 (peptidase activity),GO:0008234 (cysteine-type peptidase activity),GO:0016787 (hydrolase activity),GO:0030693 (caspase activity)	10.0719	10.4241	10.8753	9.95087	9.75458	10.3529	11.5869	12.0454	12.1405	9.82183	10.22	10.6536	10.0288	10.4082	11.5251	9.86494	9.97362	10.3848	11.6859	12.1982	12.2916	10.5335	11.5974	11.9916	12.2214	10.0514	9.87659	9.87151	9.65601	9.61844	9.45599	9.59438	9.76094	9.68197	9.46943	9.78958	9.47156	9.32768	9.57179	9.63173	9.20858	9.86479
Casp2	12366	1448165_at	caspase 2	30	GO:0006508 (proteolysis),GO:0006915 (apoptosis),GO:0006916 (anti-apoptosis),GO:0006917 (induction of apoptosis),GO:0008632 (apoptotic program),GO:0042981 (regulation of apoptosis),GO:0043066 (negative regulation of apoptosis)	GO:0005622 (intracellular),GO:0005634 (nucleus)	GO:0005515 (protein binding),GO:0008233 (peptidase activity),GO:0008234 (cysteine-type peptidase activity),GO:0016787 (hydrolase activity),GO:0030693 (caspase activity)	7.44381	6.75941	6.33174	7.47844	7.3808	7.16453	7.5331	7.76952	7.58358	7.25169	6.89334	6.12193	7.38004	7.26537	8.30713	7.94218	7.40349	7.14612	7.73808	7.86816	7.9505	7.57949	8.67731	8.36515	7.9786	7.92287	8.24578	8.14369	7.59924	8.16111	8.52961	8.50244	8.17086	7.9576	7.2284	8.26656	7.29683	7.32584	7.84367	7.05215	7.89398	7.98077
Casp4	12363	1449591_at	caspase 4, apoptosis-related cysteine peptidase	13	GO:0006508 (proteolysis),GO:0006915 (apoptosis),GO:0006917 (induction of apoptosis),GO:0042981 (regulation of apoptosis)	GO:0005622 (intracellular)	GO:0005515 (protein binding),GO:0008233 (peptidase activity),GO:0008234 (cysteine-type peptidase activity),GO:0016787 (hydrolase activity),GO:0030693 (caspase activity)	10.142	10.3263	11.1327	8.70991	9.49162	10.5864	11.5051	11.9767	12.0711	9.22799	10.0635	10.844	8.83464	9.68485	11.3302	8.39552	8.95769	10.2187	11.8982	12.0457	12.2088	10.1246	11.5658	11.856	12.0781	8.49734	8.5498	8.68345	9.49612	8.06174	8.10573	8.21232	8.37363	8.25823	8.818	8.49844	7.4769	8.42424	8.60847	9.22804	7.2252	8.77828
Cat	12359	1441413_at	Catalase	12	GO:0006118 (electron transport),GO:0006979 (response to oxidative stress),GO:0042744 (hydrogen peroxide catabolic process)	GO:0005739 (mitochondrion),GO:0005777 (peroxisome),GO:0005778 (peroxisomal membrane)	GO:0004096 (catalase activity),GO:0004601 (peroxidase activity),GO:0005506 (iron ion binding),GO:0016491 (oxidoreductase activity),GO:0016684 (oxidoreductase activity, acting on peroxide as acceptor),GO:0046872 (metal ion binding)	4.36516	5.94249	5.70953	4.07681	4.24458	4.78432	4.58475	4.36724	4.60555	5.74343	6.86401	6.34745	4.02793	4.26052	4.07365	4.99924	3.97403	4.11672	3.87147	4.05156	3.91726	4.29744	3.85749	3.9344	4.38776	4.91875	4.88316	4.06297	4.49928	5.04607	4.47475	4.65209	4.9261	4.07887	3.95264	4.76167	4.64197	5.34346	4.47441	5.13178	5.80624	5.00853
Cav2	12390	1417327_at	caveolin 2	1	GO:0001937 (negative regulation of endothelial cell proliferation),GO:0006897 (endocytosis),GO:0051259 (protein oligomerization)	GO:0005886 (plasma membrane),GO:0005887 (integral to plasma membrane),GO:0005901 (caveola),GO:0016020 (membrane),GO:0016021 (integral to membrane),GO:0016599 (caveolar membrane),GO:0030133 (transport vesicle),GO:0045121 (lipid raft),GO:0048471 (perinuclear region of cytoplasm)	GO:0005515 (protein binding),GO:0042803 (protein homodimerization activity)	10.6871	10.5197	10.0535	10.7054	10.6974	10.4783	9.76271	9.52709	9.14993	10.5703	10.4712	9.82144	11.0788	10.8248	10.1229	10.969	10.7348	10.856	10.263	9.77483	9.5839	10.8927	10.4252	9.8299	9.1865	10.7317	10.9797	11.0286	10.8762	10.8116	10.85	10.8837	11.04	10.998	10.6196	11.0853	10.6033	10.7031	11.0366	10.7296	10.543	11.1557
Cbfb	12400	1460716_a_at	core binding factor beta	4	GO:0001503 (ossification),GO:0001649 (osteoblast differentiation),GO:0006366 (transcription from RNA polymerase II promoter),GO:0030098 (lymphocyte differentiation),GO:0030099 (myeloid cell differentiation),GO:0045944 (positive regulation of transcription from RNA polymerase II promoter),GO:0048469 (cell maturation)	GO:0005634 (nucleus)	GO:0003700 (transcription factor activity),GO:0003702 (RNA polymerase II transcription factor activity),GO:0003713 (transcription coactivator activity),GO:0005515 (protein binding)	10.8746	10.8996	10.6986	11.1152	10.8868	10.7432	10.4243	10.5007	10.4976	10.9397	10.8975	10.6547	10.9019	10.75	10.5894	10.9745	11.0472	10.9334	10.7572	10.4528	10.0827	10.7309	10.7168	10.4034	9.99664	11.0833	11.2933	11.2772	11.2654	11.2527	11.4339	11.343	11.3259	11.3656	10.9096	11.3435	11.0673	10.9733	11.1697	10.7327	11.2121	11.0614
Cbr3	109857	1427912_at	carbonyl reductase 3	5	GO:0008152 (metabolic process)	GO:0005829 (cytosol)	GO:0004090 (carbonyl reductase (NADPH) activity),GO:0016491 (oxidoreductase activity)	7.89927	7.92659	7.92848	8.17308	7.66307	7.48744	6.74889	7.10932	7.09567	7.92102	8.02458	7.83686	8.43143	8.30329	7.76639	8.06266	7.6932	7.50479	7.04154	6.79929	6.65036	7.59335	7.54851	7.33509	6.64701	7.9062	8.28092	8.2291	7.86629	7.99357	8.0931	7.92782	8.03401	8.09715	7.54467	8.32615	7.66987	7.57697	7.83484	7.67366	7.64638	8.29928
Cbx3 /// LOC629578 /// LOC633016	629578	1448504_a_at	chromobox homolog 3 (Drosophila HP1 gamma) /// chromobox homolog 3 pseudogene /// similar to chromobox homolog 3	2	GO:0006333 (chromatin assembly or disassembly),GO:0006350 (transcription),GO:0006355 (regulation of transcription, DNA-dependent),GO:0016568 (chromatin modification)	GO:0000785 (chromatin),GO:0005634 (nucleus),GO:0005701 (polytene chromosome chromocenter)	GO:0003682 (chromatin binding),GO:0005515 (protein binding)	10.2215	9.82944	9.28695	10.0239	10.085	9.9393	8.86039	7.90899	7.65975	9.81347	9.91061	9.57535	9.8212	9.80339	9.27985	10.2022	10.0042	9.85614	9.16066	8.27265	8.041	9.89643	9.3758	8.90722	8.5259	10.1321	10.6177	10.2934	10.2665	10.5084	10.5904	10.4843	10.5422	10.3967	10.0749	10.4784	10.1821	10.107	10.0282	9.79143	10.3418	10.2765
Cbx5	12419	1454636_at	chromobox homolog 5 (Drosophila HP1a)	3	GO:0006333 (chromatin assembly or disassembly)	GO:0000776 (kinetochore),GO:0000785 (chromatin),GO:0005634 (nucleus),GO:0005635 (nuclear envelope),GO:0005720 (nuclear heterochromatin)	GO:0003682 (chromatin binding),GO:0005515 (protein binding)	7.45896	7.31256	6.74283	7.53273	7.64227	7.29358	6.49475	5.87213	5.86738	7.52641	7.59141	7.21822	7.23453	7.15141	7.13458	7.79906	7.5737	7.44682	6.49557	5.85828	5.64127	7.32254	6.85169	6.05785	6.06551	7.79976	8.22145	8.22033	8.00816	8.2405	8.42877	8.50063	8.40282	8.2628	7.78874	8.21591	8.04668	7.64728	8.23472	7.57153	7.88685	7.4197
Cbx6	494448	1429290_at	chromobox homolog 6	19	GO:0006333 (chromatin assembly or disassembly),GO:0006350 (transcription),GO:0006355 (regulation of transcription, DNA-dependent),GO:0008150 (biological_process),GO:0016568 (chromatin modification)	GO:0000785 (chromatin),GO:0005575 (cellular_component),GO:0005634 (nucleus)	GO:0003674 (molecular_function),GO:0003682 (chromatin binding)	6.32446	5.75577	5.53979	6.59132	6.56198	6.07263	5.0719	4.76895	4.84507	6.05371	6.10266	5.5944	6.21467	5.89346	5.06371	6.72032	6.30893	6.04788	5.41871	4.83595	4.86757	6.11141	5.6141	5.0334	5.66348	6.49025	6.72468	6.86212	6.62337	7.03127	6.9691	6.98528	6.6464	6.42326	6.16619	6.78796	6.11558	6.12271	6.20505	5.87834	6.04834	6.35663
Ccdc22	54638	1418347_at	coiled-coil domain containing 22	4				8.34989	8.20391	8.16117	8.43121	8.33155	8.24643	7.71066	7.64758	7.40208	8.34177	8.3075	8.5373	8.29454	8.24261	8.01863	8.39659	8.56979	8.54374	8.07618	7.71373	7.4885	8.3969	8.22864	7.91569	7.70933	8.69568	8.4434	8.52541	8.32059	8.52211	8.47867	8.63461	8.1604	8.22143	7.94358	8.46339	7.52202	7.56424	7.92864	7.6714	7.42046	8.52318
Ccdc23	69216	1425616_a_at	coiled-coil domain containing 23	6				8.4499	8.38626	8.52653	8.67256	8.40314	8.46841	9.37442	10.1981	10.2246	8.4901	8.47222	8.52439	8.52308	8.61252	9.22163	8.48954	8.80374	8.91446	9.99534	10.3005	10.4501	8.91433	9.78999	10.4247	10.3838	9.00573	8.64582	8.61053	8.63494	8.72162	8.615	8.5227	8.55283	8.43526	8.24013	8.71059	8.63131	8.33436	8.63639	8.57819	8.58389	8.728
Ccdc5	225745	1424955_at	coiled-coil domain containing 5	1	GO:0007049 (cell cycle),GO:0007067 (mitosis),GO:0008150 (biological_process),GO:0051301 (cell division)	GO:0005575 (cellular_component),GO:0005874 (microtubule)	GO:0003674 (molecular_function)	8.43732	8.32629	8.12561	8.90452	8.28593	8.02664	7.5521	7.75917	7.40828	8.3827	8.40707	8.06483	8.3454	8.15926	7.87725	8.40127	8.90723	8.96135	8.59162	8.17368	7.86732	8.91128	8.9206	8.76464	8.29179	9.1609	9.01522	9.01433	8.90474	8.97777	9.06265	9.07917	9.05089	9.05538	8.55475	8.96149	8.86469	8.51639	8.87456	8.72764	8.75232	8.46581
Ccdc86	108673	1454197_a_at	coiled-coil domain containing 86	6				7.2098	7.36628	8.10561	7.45508	7.19206	7.86423	9.57534	10.1283	9.95988	7.39845	7.52487	8.00075	7.2681	7.86609	9.24958	7.28092	8.64532	8.84077	9.5726	9.98431	9.90204	8.39525	9.63422	9.63949	9.72389	8.66492	7.85713	7.92563	7.8725	7.95849	7.76985	7.8393	7.48496	7.62413	7.38876	7.5537	6.7826	6.56468	6.07545	6.65046	6.38043	7.36691
Ccdc94	72886	1429733_at	coiled-coil domain containing 94	24				6.96645	6.97019	7.31443	6.78292	6.68216	7.00061	7.32207	7.90804	7.80681	6.83262	6.99565	7.42105	6.40023	6.87438	6.56357	6.50546	7.06695	7.6085	8.233	8.40067	8.31879	7.37881	7.37715	7.29466	7.29746	6.8711	6.75401	6.93006	7.09561	6.81242	6.7959	6.84753	6.63354	6.60406	6.56012	6.75465	6.15864	6.67127	6.59907	6.68272	6.05384	6.65578
Ccdc99	70385	1424971_at	coiled-coil domain containing 99	18				10.1176	9.78614	8.52992	10.1418	10.0722	9.75248	7.69741	6.99476	8.02248	9.99901	9.81672	8.76533	9.77267	9.56383	8.55593	9.92224	8.41412	8.57502	7.14139	7.09963	8.20067	9.16979	8.23447	9.2116	9.60521	8.17147	9.487	9.73712	9.72876	8.98305	9.10502	9.10112	9.32048	9.4225	9.18726	9.60376	9.85066	9.56359	10.0222	9.62935	9.52277	9.27012
Ccl22	20299	1417925_at	chemokine (C-C motif) ligand 22	21	GO:0006935 (chemotaxis),GO:0006954 (inflammatory response),GO:0006955 (immune response),GO:0007165 (signal transduction),GO:0007267 (cell-cell signaling),GO:0009615 (response to virus),GO:0019735 (antimicrobial humoral response (sensu Vertebrata))	GO:0005576 (extracellular region),GO:0005615 (extracellular space)	GO:0005125 (cytokine activity),GO:0008009 (chemokine activity)	4.97812	5.34024	6.84363	4.76874	4.87656	5.56277	6.90618	6.96523	6.79273	4.82913	4.91692	6.73844	4.6864	5.07474	6.2193	4.49611	4.89553	7.55842	8.34307	7.83602	7.61565	5.14657	5.23008	5.42227	5.33549	4.52197	4.88092	4.71807	5.08364	4.78473	5.03633	4.48818	4.96319	5.1486	4.9543	4.78562	4.98533	4.76123	4.68236	5.71647	4.63171	4.68311
Ccl3	20302	1419561_at	chemokine (C-C motif) ligand 3	28	GO:0006935 (chemotaxis),GO:0006954 (inflammatory response),GO:0006955 (immune response),GO:0007165 (signal transduction)	GO:0005576 (extracellular region),GO:0005615 (extracellular space)	GO:0005125 (cytokine activity),GO:0005515 (protein binding),GO:0008009 (chemokine activity)	13.2164	13.2172	13.46	12.1227	13.2178	13.4828	13.7286	13.3327	13.3992	12.7956	13.1041	13.3822	12.9209	13.0259	12.954	11.406	12.1254	12.9525	13.237	13.1863	13.0601	11.9161	11.8843	11.8392	10.9814	9.58347	10.1797	11.7352	12.2247	10.0107	9.93985	9.64545	10.3309	10.957	12.5369	10.3699	12.1014	11.6663	12.0964	12.1062	10.0898	10.7123
Ccl4	20303	1421578_at	chemokine (C-C motif) ligand 4	28	GO:0006935 (chemotaxis),GO:0006954 (inflammatory response),GO:0006955 (immune response),GO:0007165 (signal transduction)	GO:0005576 (extracellular region),GO:0005615 (extracellular space)	GO:0005125 (cytokine activity),GO:0005515 (protein binding),GO:0008009 (chemokine activity)	12.8166	12.3214	12.7333	10.9409	12.971	13.4942	13.3398	12.8317	12.7619	11.9764	12.1059	12.4191	12.3992	13.0817	12.6678	10.3352	11.7281	12.7852	12.788	12.5654	12.3645	11.8107	12.1191	11.9266	11.1269	9.10447	9.31599	11.4622	12.6784	9.74681	9.72373	9.64339	9.70022	10.5508	12.8839	9.73742	11.3646	9.87238	11.5416	10.4568	8.93367	9.6174
Ccl5	20304	1418126_at	chemokine (C-C motif) ligand 5	13	GO:0006874 (calcium ion homeostasis),GO:0006887 (exocytosis),GO:0006928 (cell motility),GO:0006935 (chemotaxis),GO:0006954 (inflammatory response),GO:0006955 (immune response),GO:0006968 (cellular defense response),GO:0006979 (response to oxidative stress),GO:0007155 (cell adhesion),GO:0007165 (signal transduction),GO:0007267 (cell-cell signaling),GO:0009615 (response to virus)	GO:0005576 (extracellular region),GO:0005615 (extracellular space)	GO:0005125 (cytokine activity),GO:0008009 (chemokine activity),GO:0042056 (chemoattractant activity)	8.37918	10.6742	12.3824	5.75268	9.35517	12.586	13.6041	13.6643	13.7235	6.84101	9.43016	11.381	8.37499	11.9986	13.3476	5.30453	8.47132	12.4433	13.5124	13.7077	13.7376	11.1669	13.2638	13.515	13.609	6.2323	5.81667	6.63429	10.3822	5.52876	5.61508	5.58912	6.0142	5.98094	10.3484	5.81282	5.70112	6.96761	5.54871	9.3464	5.58116	5.53873
Ccl8	20307	1419684_at	chemokine (C-C motif) ligand 8	6	GO:0006935 (chemotaxis),GO:0006954 (inflammatory response),GO:0006955 (immune response),GO:0007165 (signal transduction)	GO:0005576 (extracellular region),GO:0005615 (extracellular space)	GO:0005125 (cytokine activity),GO:0008009 (chemokine activity),GO:0008201 (heparin binding)	7.46464	7.55587	8.66502	6.30403	6.36502	8.16451	10.8174	11.9795	12.3398	6.82903	7.19167	7.83289	5.83229	7.86554	11.5547	6.12173	7.56943	9.04111	11.8013	12.0336	12.2381	9.91138	11.7367	12.2178	12.365	7.32072	5.33556	5.08171	5.4492	4.92801	5.14981	5.61179	5.15243	5.11053	5.27565	5.38756	5.33342	5.13683	5.05112	5.02841	5.03511	5.6035
Ccl9	20308	1417936_at	chemokine (C-C motif) ligand 9	21	GO:0006935 (chemotaxis),GO:0006955 (immune response),GO:0007165 (signal transduction)	GO:0005576 (extracellular region),GO:0005615 (extracellular space)	GO:0005125 (cytokine activity),GO:0008009 (chemokine activity)	13.2025	13.3871	13.5655	12.7855	13.1356	13.4517	13.5553	13.5246	13.5687	12.8918	13.2172	13.4712	13.025	13.1495	13.2791	12.8747	13.2526	13.511	13.5623	13.6225	13.6161	13.3206	13.3736	13.3543	13.5066	13.0786	13.1144	13.1575	13.296	12.8883	12.9341	12.9423	13.0689	13.1063	13.096	13.1751	12.9347	13.0629	12.9311	13.2083	12.8008	13.2367
Ccna2	12428	1417910_at	cyclin A2	1	GO:0000074 (regulation of progression through cell cycle),GO:0000079 (regulation of cyclin-dependent protein kinase activity),GO:0007049 (cell cycle),GO:0007067 (mitosis),GO:0007095 (mitotic G2 checkpoint),GO:0045941 (positive regulation of transcription),GO:0051301 (cell division)	GO:0001939 (female pronucleus),GO:0001940 (male pronucleus),GO:0005634 (nucleus),GO:0005737 (cytoplasm)	GO:0005515 (protein binding),GO:0016538 (cyclin-dependent protein kinase regulator activity)	9.91514	9.81242	9.15264	10.0798	9.74128	9.45593	8.10679	6.37385	5.99343	9.92333	9.92517	9.30661	9.85057	9.72081	8.91387	9.92812	9.16845	9.23162	8.37518	7.05234	6.78448	9.41803	8.80875	8.01455	7.15099	9.41977	10.6765	10.6889	10.4276	10.4378	10.5763	10.4254	10.6176	10.6565	10.2666	10.7746	10.4173	10.2863	10.5569	10.3091	10.4017	10.2566
Ccnb1-rs1 /// Ccnb1 /// EG434175 /// LOC672788	268697,434175	1416076_at	cyclin B1, related sequence 1 /// cyclin B1 /// predicted gene, EG434175 /// similar to G2/mitotic-specific cyclin-B1	1	GO:0000074 (regulation of progression through cell cycle),GO:0000910 (cytokinesis),GO:0006468 (protein amino acid phosphorylation),GO:0006605 (protein targeting),GO:0007049 (cell cycle),GO:0007067 (mitosis),GO:0051301 (cell division)	GO:0005634 (nucleus)	GO:0005515 (protein binding),GO:0016301 (kinase activity),GO:0016538 (cyclin-dependent protein kinase regulator activity)	8.9796	9.19814	8.64862	9.12196	8.95857	8.78566	7.46669	6.88966	6.77468	9.01508	9.28741	8.44269	8.84321	8.79744	7.59637	8.93252	8.1543	8.4329	7.57178	7.28904	7.08109	8.34462	7.98492	7.45217	7.11359	8.28878	9.52212	9.4723	9.59267	9.1395	9.20864	9.11339	9.16564	9.26892	8.98437	9.65998	9.88769	9.54986	9.94274	9.81564	9.48011	9.32967
Ccnb2	12442	1450920_at	cyclin B2	1	GO:0000074 (regulation of progression through cell cycle),GO:0007049 (cell cycle),GO:0007067 (mitosis),GO:0051301 (cell division)	GO:0005634 (nucleus),GO:0015630 (microtubule cytoskeleton)	GO:0005515 (protein binding),GO:0016538 (cyclin-dependent protein kinase regulator activity)	9.78394	9.66354	9.41197	10.0355	9.70878	9.58027	8.91989	8.03377	7.35503	9.82739	9.80316	9.38817	9.57969	9.48601	8.96953	9.83145	8.57736	8.78386	8.58527	8.23917	7.9358	8.73715	8.76719	8.74744	8.21266	8.75878	10.125	10.2345	10.0564	9.67342	9.64562	9.67271	9.96631	9.95359	9.72333	10.2819	9.84145	9.47429	10.2553	9.92497	9.42581	10.4457
Ccnd1	12443	1448698_at	cyclin D1	7	GO:0000074 (regulation of progression through cell cycle),GO:0000082 (G1/S transition of mitotic cell cycle),GO:0000320 (re-entry into mitotic cell cycle),GO:0006468 (protein amino acid phosphorylation),GO:0007049 (cell cycle),GO:0030968 (unfolded protein response),GO:0045444 (fat cell differentiation),GO:0051301 (cell division)	GO:0000307 (cyclin-dependent protein kinase holoenzyme complex),GO:0005622 (intracellular),GO:0005634 (nucleus),GO:0005829 (cytosol)	GO:0004672 (protein kinase activity),GO:0005515 (protein binding),GO:0016301 (kinase activity),GO:0016538 (cyclin-dependent protein kinase regulator activity)	10.5244	9.89921	8.75655	11.5248	10.6807	10.1375	8.48865	8.98165	9.29035	10.6124	10.0655	9.20235	10.8291	10.4319	9.72937	11.0055	12.1998	11.5996	9.79746	9.09049	9.43859	11.6301	10.6649	10.8964	11.5809	12.2265	11.6237	11.7196	11.4527	12.0034	11.9926	11.988	11.7288	11.7906	11.3167	11.5302	11.3346	10.8967	10.0512	9.42485	11.4071	10.8801
Ccnf	12449	1422513_at	cyclin F	3	GO:0000074 (regulation of progression through cell cycle),GO:0000320 (re-entry into mitotic cell cycle),GO:0001890 (placenta development),GO:0007049 (cell cycle),GO:0007067 (mitosis),GO:0051301 (cell division)	GO:0005634 (nucleus)	GO:0016538 (cyclin-dependent protein kinase regulator activity)	6.92394	6.12191	6.06631	7.34345	7.11365	5.83987	4.01525	4.62178	4.82153	7.02983	6.65514	6.16824	7.00649	6.42814	3.85099	7.27616	6.93759	6.62198	4.51544	4.25332	4.46816	7.07761	5.37768	5.06512	5.4031	7.15531	8.21191	8.34491	7.82958	7.69829	8.13943	8.07947	7.67678	7.8439	7.33083	8.18062	7.91764	7.28414	7.85114	7.42785	7.94303	7.54
Ccr7	12775	1423466_at	chemokine (C-C motif) receptor 7	22	GO:0006935 (chemotaxis),GO:0006954 (inflammatory response),GO:0006955 (immune response),GO:0007165 (signal transduction),GO:0007186 (G-protein coupled receptor protein signaling pathway),GO:0007204 (elevation of cytosolic calcium ion concentration),GO:0019735 (antimicrobial humoral response (sensu Vertebrata))	GO:0005615 (extracellular space),GO:0005886 (plasma membrane),GO:0005887 (integral to plasma membrane),GO:0016020 (membrane),GO:0016021 (integral to membrane)	GO:0001584 (rhodopsin-like receptor activity),GO:0004871 (signal transducer activity),GO:0004872 (receptor activity),GO:0004930 (G-protein coupled receptor activity),GO:0016493 (C-C chemokine receptor activity)	4.04742	5.06637	5.9212	3.31176	3.77774	4.25482	4.76635	4.32962	4.95406	3.88408	4.74427	5.20097	3.58935	3.46565	3.6981	3.58049	3.5552	3.77825	4.03284	4.46778	4.30745	3.42498	3.76375	4.07485	4.20308	3.4644	3.58701	3.85585	4.06627	3.68297	3.5848	3.8059	3.67534	4.0639	3.94047	3.60751	4.12957	4.16125	3.66245	3.97568	4.07988	3.67496
Ccrl2	54199	1427736_a_at	chemokine (C-C motif) receptor-like 2	28	GO:0007165 (signal transduction),GO:0007186 (G-protein coupled receptor protein signaling pathway)	GO:0016020 (membrane),GO:0016021 (integral to membrane)	GO:0001584 (rhodopsin-like receptor activity),GO:0004871 (signal transducer activity),GO:0004872 (receptor activity),GO:0004930 (G-protein coupled receptor activity),GO:0016493 (C-C chemokine receptor activity)	11.303	11.3347	10.7195	8.98847	11.7541	12.29	12.1675	11.7309	11.8929	10.9355	10.7895	10.3571	11.5059	12.3735	12.3783	6.53669	10.2641	11.0081	11.3507	11.3407	11.5202	10.4916	11.4186	11.2367	10.8618	5.88725	6.58193	9.86911	11.7549	6.74483	6.18926	6.56712	6.54022	8.11612	11.278	6.7787	10.2447	9.81574	10.6396	10.7257	6.10728	6.62023
Ccrn4l	12457	1425837_a_at	CCR4 carbon catabolite repression 4-like (S. cerevisiae)	28	GO:0006366 (transcription from RNA polymerase II promoter),GO:0015074 (DNA integration),GO:0048511 (rhythmic process)	GO:0005634 (nucleus)	GO:0003676 (nucleic acid binding),GO:0003677 (DNA binding),GO:0003700 (transcription factor activity),GO:0004523 (ribonuclease H activity),GO:0008270 (zinc ion binding),GO:0008907 (integrase activity)	10.6797	10.4231	8.51504	6.79299	10.5919	11.464	10.0561	10.1395	10.1762	10.1774	9.99427	8.94158	9.40288	11.0841	9.45283	6.27885	11.2177	11.7379	9.88551	9.57082	9.45439	10.5074	8.83577	7.11477	6.8173	8.95084	7.13682	9.00609	10.6242	7.62807	7.60361	7.89747	7.32291	7.53235	10.3284	7.13382	9.02966	9.35003	9.62723	9.96947	5.79821	5.87298
Cct5	12465	1417258_at	chaperonin subunit 5 (epsilon)	20	GO:0006457 (protein folding),GO:0044267 (cellular protein metabolic process)	GO:0005832 (chaperonin-containing T-complex)	GO:0000166 (nucleotide binding),GO:0005515 (protein binding),GO:0005524 (ATP binding),GO:0051082 (unfolded protein binding)	10.8746	10.9414	10.9211	11.0786	10.9268	10.8333	10.6958	10.8111	10.6052	10.9183	10.9125	11.0813	11.0288	10.9212	10.7841	11.0373	11.5129	11.4097	10.95	10.8731	10.7082	11.1267	11.0255	10.8826	10.6674	11.5264	11.0843	11.1414	11.0061	11.1719	11.1079	11.2568	11.1071	11.1242	10.7712	11.0176	10.7268	10.4206	10.6882	10.5296	10.3512	10.9984
Cd14	12475	1417268_at	CD14 antigen	15	GO:0006909 (phagocytosis),GO:0006915 (apoptosis),GO:0006954 (inflammatory response),GO:0006955 (immune response),GO:0007166 (cell surface receptor linked signal transduction)	GO:0005615 (extracellular space),GO:0005886 (plasma membrane),GO:0016020 (membrane),GO:0019898 (extrinsic to membrane)	GO:0005515 (protein binding),GO:0016019 (peptidoglycan receptor activity),GO:0048503 (GPI anchor binding)	13.1841	13.2621	13.2918	12.7963	13.1772	13.4443	13.3058	13.2286	12.9397	12.9627	13.0848	13.2244	12.9763	13.1377	13.0637	12.3701	12.9567	13.1761	13.0395	12.9267	12.594	12.9039	12.6824	12.3427	11.9811	12.6229	12.4147	12.4993	12.8912	12.5041	12.4899	12.462	12.4149	12.5455	12.6296	12.4304	12.2662	12.5784	12.5665	12.7724	11.1045	12.188
Cd200	17470	1448788_at	Cd200 antigen	9		GO:0016020 (membrane),GO:0016021 (integral to membrane)	GO:0005515 (protein binding)	3.97943	4.02816	5.08183	3.37209	3.69913	3.61281	6.09479	6.70868	7.22277	3.61378	3.78254	4.36515	3.4666	4.02855	5.54367	3.37133	3.74216	5.15067	7.66214	8.4661	8.39493	3.85678	4.78422	5.83819	4.94545	3.44639	3.70709	3.77483	4.05483	3.56341	3.56923	3.06562	3.46708	3.51307	3.45879	3.74562	3.91502	4.78168	4.43761	5.0692	4.0194	3.83734
Cd209f	69142	1449971_a_at	CD209f antigen	22	GO:0008150 (biological_process)	GO:0016021 (integral to membrane)	GO:0005529 (sugar binding),GO:0005537 (mannose binding)	4.87099	4.74679	4.9215	5.04384	4.86698	4.97093	4.92823	4.83935	4.89637	5.13293	4.5713	4.68914	4.87604	4.80007	4.87437	4.77422	4.78893	4.81195	5.0843	5.01919	4.76892	4.85602	4.76249	5.11159	4.80636	4.7295	4.92828	4.86288	5.06268	5.28248	4.73941	4.88017	5.01602	4.80743	4.96291	4.95778	5.15641	5.06315	5.10222	5.18292	4.95154	5.03014
Cd209g	70192	1449918_at	CD209g antigen	22	GO:0008150 (biological_process)	GO:0005575 (cellular_component)	GO:0005529 (sugar binding)	3.36513	3.33305	3.37627	3.53975	3.56759	3.49759	3.81313	3.85991	3.82614	3.42046	3.49631	3.40453	3.40557	3.77333	3.46082	3.32259	3.48142	3.64838	3.61767	3.63801	3.33142	3.49044	3.69097	3.69346	3.69452	3.34321	3.70641	3.59901	3.71252	3.59464	3.59518	3.61516	3.65664	3.75052	4.07055	3.68047	4.35653	3.72946	3.47956	3.80091	3.70438	3.61565
Cd274	60533	1419714_at	CD274 antigen	13	GO:0006955 (immune response),GO:0007166 (cell surface receptor linked signal transduction),GO:0008283 (cell proliferation)	GO:0005615 (extracellular space),GO:0009897 (external side of plasma membrane),GO:0016020 (membrane),GO:0016021 (integral to membrane)	GO:0004872 (receptor activity),GO:0005102 (receptor binding),GO:0005515 (protein binding)	8.99636	8.87098	9.99324	7.19082	8.21583	9.94665	11.5892	11.7236	11.9262	8.22462	8.11806	9.41139	7.86238	9.28441	11.801	7.21924	7.2024	8.8365	11.5566	11.5997	11.7853	8.52219	11.2444	11.3082	11.1737	6.17881	6.73564	7.18488	7.58805	5.71193	6.11971	6.25877	6.40904	6.45737	7.45394	6.65542	7.89607	7.9678	8.11986	8.5656	7.33716	7.35757
Cd28	12487	1417597_at	CD28 antigen	18	GO:0006955 (immune response),GO:0006959 (humoral immune response),GO:0008624 (induction of apoptosis by extracellular signals),GO:0031295 (T cell costimulation),GO:0042089 (cytokine biosynthetic process),GO:0042102 (positive regulation of T cell proliferation),GO:0045060 (negative thymic T cell selection),GO:0045070 (positive regulation of viral genome replication),GO:0045086 (positive regulation…	GO:0005886 (plasma membrane),GO:0005887 (integral to plasma membrane),GO:0009897 (external side of plasma membrane),GO:0016020 (membrane),GO:0016021 (integral to membrane)	GO:0005515 (protein binding),GO:0015026 (coreceptor activity),GO:0042802 (identical protein binding)	9.48891	10.2686	9.1621	10.2342	9.4916	8.81752	7.04482	4.78171	4.68433	10.7718	10.0721	9.29538	10.8964	10.195	8.77492	9.86486	7.02991	6.97827	5.67266	4.30799	3.96922	8.53017	7.26904	6.51622	5.77881	7.50454	7.63577	7.81957	7.07689	6.96478	7.2528	7.40055	7.72112	7.63473	6.99006	7.99984	9.47748	9.03605	9.63325	9.14823	9.40923	8.5345
Cd300lb	217304	1445882_at	CD300 antigen like family member B	14			GO:0004872 (receptor activity)	9.67044	8.75823	8.79424	11.0606	9.84795	7.95931	4.98539	6.11634	6.65844	10.0415	9.9183	9.04354	10.6261	9.3703	5.11772	11.0785	9.64401	8.19016	4.64599	6.69822	7.51772	9.98368	6.63693	8.46987	9.89694	10.785	10.8173	10.4748	9.39708	10.9407	11.06	11.0257	10.7877	10.7902	9.32368	10.8726	9.8439	9.9669	10.0446	9.00838	10.4625	11.0523
Cd302	66205	1448919_at	CD302 antigen	12		GO:0016020 (membrane),GO:0016021 (integral to membrane)	GO:0005529 (sugar binding)	8.94637	8.86595	9.21692	8.94528	8.77297	8.73244	8.72896	9.84193	9.74074	8.81549	8.97287	8.91521	8.81738	8.83763	8.58881	8.70246	9.54996	9.56191	9.58752	9.55473	9.50903	9.52471	9.52798	9.37876	9.14492	9.58606	9.42114	9.35411	9.39	9.5155	9.68117	9.63615	9.69368	9.66589	9.21324	9.50571	8.81313	8.49694	9.23672	9.08814	8.53083	9.57344
Cd38	12494	1433741_at	CD38 antigen	17	GO:0006091 (generation of precursor metabolites and energy),GO:0007165 (signal transduction),GO:0008624 (induction of apoptosis by extracellular signals)	GO:0005624 (membrane fraction),GO:0005886 (plasma membrane),GO:0016020 (membrane),GO:0016021 (integral to membrane)	GO:0003953 (NAD+ nucleosidase activity),GO:0016787 (hydrolase activity),GO:0016798 (hydrolase activity, acting on glycosyl bonds),GO:0016849 (phosphorus-oxygen lyase activity)	5.21432	5.93536	7.46081	4.45466	4.55947	5.43801	7.74708	9.74291	9.88278	4.87226	5.41085	6.78058	3.62059	3.64226	4.86499	4.6866	4.00093	5.08	7.84429	8.80204	9.37722	4.41751	5.82906	6.52749	6.35586	3.84669	3.70005	3.70844	3.64507	3.66232	3.90053	3.7584	3.88766	3.843	3.85867	3.58962	3.24937	4.02342	3.93091	4.19396	3.75202	3.77324
Cd40	21939	1460415_a_at	CD40 antigen	13	GO:0002768 (immune response-regulating cell surface receptor signaling pathway),GO:0006461 (protein complex assembly),GO:0006915 (apoptosis),GO:0006954 (inflammatory response),GO:0006955 (immune response),GO:0007165 (signal transduction),GO:0007275 (multicellular organismal development),GO:0019735 (antimicrobial humoral response (sensu Vertebrata)),GO:0030168 (platelet activation),GO:0030890 (pos…	GO:0005886 (plasma membrane),GO:0005887 (integral to plasma membrane),GO:0009897 (external side of plasma membrane),GO:0016020 (membrane),GO:0016021 (integral to membrane)	GO:0004872 (receptor activity),GO:0004888 (transmembrane receptor activity),GO:0005515 (protein binding),GO:0019899 (enzyme binding)	10.235	10.8211	11.6565	7.33576	9.14673	11.1501	12.5898	12.6192	12.5618	9.06341	9.77633	10.6039	8.76054	10.5193	12.2229	7.13924	8.81451	11.1059	12.4329	12.5025	12.3774	10.0377	11.7325	11.7705	11.7159	7.79606	7.04721	7.28965	9.34506	6.85792	7.11516	7.15239	7.18299	7.21303	8.52441	7.17039	7.56546	7.95377	7.79494	9.50812	5.97957	7.23948
Cd47	16423	1449507_a_at	CD47 antigen (Rh-related antigen, integrin-associated signal transducer)	13	GO:0007155 (cell adhesion),GO:0007229 (integrin-mediated signaling pathway),GO:0008228 (opsonization),GO:0050766 (positive regulation of phagocytosis)	GO:0005615 (extracellular space),GO:0005887 (integral to plasma membrane),GO:0016020 (membrane),GO:0016021 (integral to membrane)	GO:0005515 (protein binding)	11.5128	11.783	12.0597	11.5725	11.279	11.692	12.3143	12.5501	12.5249	11.353	11.6733	11.7704	11.334	11.5017	12.1663	11.3379	11.5667	11.8542	12.4688	12.6209	12.6502	11.8602	12.3945	12.5253	12.6663	11.6144	11.2552	11.2268	11.2085	11.2731	11.2169	11.352	11.2711	11.2793	11.0071	11.2663	11.1361	11.0869	11.243	11.2186	10.9221	11.3208
Cd52	23833	1460218_at	CD52 antigen	12		GO:0005615 (extracellular space),GO:0016020 (membrane),GO:0016021 (integral to membrane)	GO:0048503 (GPI anchor binding)	11.2932	11.4693	11.6891	10.8874	11.0353	11.3044	11.5809	12.3873	12.5532	11.1468	11.4589	11.602	11.2527	11.2872	11.6255	10.953	12.1344	12.2072	12.4115	12.4927	12.5616	12.5084	12.5209	12.5391	12.6814	12.2518	11.9464	11.9417	11.8828	12.0468	12.0877	12.031	12.055	11.9238	11.7204	12.0342	10.9215	10.8762	10.9439	10.9457	10.8217	11.8309
Cd55	13136	1460242_at	CD55 antigen	11	GO:0006955 (immune response),GO:0006958 (complement activation, classical pathway),GO:0045087 (innate immune response)	GO:0005615 (extracellular space),GO:0016020 (membrane),GO:0016021 (integral to membrane)	GO:0048503 (GPI anchor binding)	2.89545	2.9829	3.26776	3.02125	3.02968	3.40358	3.59335	4.8074	4.77427	2.85113	2.86903	3.21804	2.75286	3.0634	2.97358	2.86728	3.32303	4.24451	4.35928	4.50632	4.67112	3.86348	4.3349	4.08685	3.68635	3.36201	3.112	3.06091	3.28308	3.40504	3.003	3.14089	3.14397	2.95373	2.92835	3.0165	3.16372	2.77152	2.9301	2.76106	2.85284	3.18861
Cd68	12514	1449164_at	CD68 antigen	18		GO:0005615 (extracellular space),GO:0005624 (membrane fraction),GO:0005764 (lysosome),GO:0005886 (plasma membrane),GO:0016020 (membrane),GO:0016021 (integral to membrane)		13.0828	13.0271	13.011	13.1232	13.1323	13.0602	12.7714	12.5028	12.5088	12.9589	13.0073	12.8482	13.213	13.1269	13.0326	13.2281	12.9183	12.8962	12.7662	12.8027	12.8704	13.1906	12.9644	12.7856	12.9342	12.9735	13.0419	12.9959	12.9881	13.1041	13.1354	13.0572	13.0875	13.1125	12.8118	13.0574	13.1207	12.7714	13.1609	13.04	12.713	13.1898
Cd69	12515	1428735_at	CD69 antigen	25	GO:0006952 (defense response),GO:0007166 (cell surface receptor linked signal transduction)	GO:0005887 (integral to plasma membrane),GO:0009897 (external side of plasma membrane),GO:0016020 (membrane),GO:0016021 (integral to membrane)	GO:0004888 (transmembrane receptor activity),GO:0005529 (sugar binding)	9.32103	9.71149	10.0929	6.2264	8.42901	10.7644	12.3759	12.3798	11.9831	8.35964	9.51164	10.1045	7.17056	10.015	12.1893	5.04749	6.33124	9.43357	12.2527	12.1677	11.8519	9.06041	12.2922	12.0321	10.9674	4.10988	3.75316	6.14142	6.46481	3.14255	2.88707	3.42931	3.58239	4.19498	6.05964	3.47181	5.41285	7.12322	6.97326	8.24095	3.66609	3.21062
Cd81	12520	1416330_at	CD 81 antigen	1	GO:0000187 (activation of MAPK activity),GO:0006661 (phosphatidylinositol biosynthetic process),GO:0008104 (protein localization),GO:0008284 (positive regulation of cell proliferation),GO:0030307 (positive regulation of cell growth),GO:0030384 (phosphoinositide metabolic process),GO:0030890 (positive regulation of B cell proliferation),GO:0043128 (positive regulation of 1-phosphatidylinositol 4-k…	GO:0005886 (plasma membrane),GO:0005887 (integral to plasma membrane),GO:0016020 (membrane),GO:0016021 (integral to membrane)	GO:0005515 (protein binding)	11.2339	11.0101	10.988	11.2519	11.2667	11.1661	10.7972	10.0893	9.97415	10.8937	11.0808	10.9057	11.4147	11.3118	11.0298	11.4362	10.5396	10.4908	10.5891	10.3246	10.137	10.5106	10.421	10.3989	10.232	10.6702	11.3966	11.3398	11.3075	11.3612	11.5198	11.281	11.4796	11.5093	11.1434	11.525	11.1558	11.1097	11.0532	10.7739	11.2765	11.4547
Cd83	12522	1416111_at	CD83 antigen	28		GO:0005615 (extracellular space),GO:0005886 (plasma membrane),GO:0016021 (integral to membrane)		12.6728	12.6589	11.8403	8.92304	12.2045	12.3934	11.0999	10.5573	10.4003	12.1726	12.4194	11.8443	11.7762	12.4554	12.2236	8.56393	11.7333	12.3277	11.3045	10.8671	10.5156	11.8646	11.087	10.7006	10.1449	7.98991	7.34842	8.83447	11.4897	7.52099	7.6844	7.82927	7.81732	8.20104	10.6388	7.77764	10.8206	11.1723	11.2249	11.9767	7.28676	8.08052
Cd86	12524	1420404_at	CD86 antigen	6	GO:0006952 (defense response)	GO:0009897 (external side of plasma membrane),GO:0016020 (membrane),GO:0016021 (integral to membrane)	GO:0004872 (receptor activity)	7.83836	7.78341	7.75889	7.48717	7.43915	8.67884	9.05031	9.93631	10.0831	7.68569	8.00805	7.97493	7.2653	8.36611	9.41317	7.29338	5.45781	6.90534	9.08186	9.43863	9.39382	6.81873	8.70282	9.87673	10.0921	5.49824	5.76499	5.90346	6.89536	5.57505	5.52111	5.33743	5.81559	5.76461	7.19606	6.01245	4.99133	5.20845	5.53581	5.64327	5.17241	6.25817
Cd8b1	12526	1448569_at	CD8 antigen, beta chain 1	5	GO:0006955 (immune response),GO:0007169 (transmembrane receptor protein tyrosine kinase signaling pathway),GO:0042110 (T cell activation)	GO:0009897 (external side of plasma membrane),GO:0009986 (cell surface),GO:0016020 (membrane),GO:0016021 (integral to membrane),GO:0042101 (T cell receptor complex)	GO:0005515 (protein binding),GO:0015026 (coreceptor activity),GO:0042288 (MHC class I protein binding)	8.14127	7.98224	7.88224	8.19275	7.91568	7.48298	6.34147	5.79838	5.87997	8.04119	8.06619	8.02764	8.20942	7.83605	7.29758	8.16676	8.08415	7.69981	6.81463	5.9383	5.72474	7.7108	6.98569	6.22234	6.28563	8.16878	8.42609	8.49945	8.11507	8.37973	8.89516	8.59679	8.62021	8.52989	8.20396	8.59213	8.60201	8.42654	8.59004	8.33516	8.48656	8.27602
Cd9	12527	1416066_at	CD9 antigen	1	GO:0006928 (cell motility),GO:0007155 (cell adhesion),GO:0007338 (single fertilization),GO:0007342 (fusion of sperm to egg plasma membrane),GO:0008285 (negative regulation of cell proliferation),GO:0030168 (platelet activation),GO:0030913 (paranodal junction assembly)	GO:0005886 (plasma membrane),GO:0005887 (integral to plasma membrane),GO:0016020 (membrane),GO:0016021 (integral to membrane)	GO:0005515 (protein binding)	11.2348	11.0213	10.9223	10.3291	10.8756	10.8957	10.4698	10.0739	9.80496	10.7789	11.0071	10.4399	11.5306	11.3576	11.0549	10.9577	10.9733	10.7441	10.1046	9.94626	9.82808	10.534	10.1595	9.69977	9.70637	11.1151	11.5191	11.4025	11.3741	11.3601	11.2118	11.2574	11.3303	11.3359	10.9965	11.4348	11.4217	11.26	11.7282	11.4546	11.1682	11.6342
Cd93	17064	1456046_at	CD93 antigen	18	GO:0006909 (phagocytosis),GO:0006952 (defense response),GO:0007155 (cell adhesion),GO:0016337 (cell-cell adhesion),GO:0042116 (macrophage activation)	GO:0005615 (extracellular space),GO:0005886 (plasma membrane),GO:0016020 (membrane),GO:0016021 (integral to membrane),GO:0016023 (cytoplasmic membrane-bound vesicle)	GO:0001849 (complement component C1q binding),GO:0004872 (receptor activity),GO:0005509 (calcium ion binding),GO:0005515 (protein binding),GO:0005529 (sugar binding)	11.4291	11.6811	11.3656	12.3437	11.6985	11.3904	10.9402	10.7543	10.6631	11.9552	11.6045	11.5045	11.8228	11.6957	11.2276	11.8985	12.0885	11.8799	11.5463	11.0888	10.7864	12.1461	11.6645	11.2762	11.0778	12.0345	11.2057	11.2567	11.0457	11.2522	11.37	11.2738	11.3517	11.3395	11.0027	11.3949	11.556	11.1249	11.74	11.3593	11.2889	11.6211
Cdc20	107995	1416664_at	cell division cycle 20 homolog (S. cerevisiae)	1	GO:0006512 (ubiquitin cycle),GO:0007049 (cell cycle),GO:0007067 (mitosis),GO:0051301 (cell division)		GO:0005515 (protein binding)	9.30747	9.19418	8.6821	9.39503	9.40299	9.04951	7.0576	6.23898	5.69938	9.38132	9.49868	8.88208	9.26204	9.01105	7.53752	9.43386	8.4473	8.35064	7.17754	6.69643	6.27534	8.44229	7.8287	7.27999	6.90007	8.55028	9.53939	9.7215	9.5971	9.32156	9.32192	9.27761	9.31544	9.38452	9.05675	9.63201	9.85775	9.19671	9.83685	9.48273	9.17689	9.62278
Cdc25b	12531	1421963_a_at	cell division cycle 25 homolog B (S. cerevisiae)	3	GO:0000087 (M phase of mitotic cell cycle),GO:0001556 (oocyte maturation),GO:0006470 (protein amino acid dephosphorylation),GO:0007049 (cell cycle),GO:0007067 (mitosis),GO:0007144 (female meiosis I),GO:0045860 (positive regulation of protein kinase activity),GO:0051301 (cell division)	GO:0005622 (intracellular)	GO:0004721 (phosphoprotein phosphatase activity),GO:0004725 (protein tyrosine phosphatase activity),GO:0016787 (hydrolase activity)	8.01415	7.5719	6.65137	7.79341	7.63602	7.28526	5.43836	4.40666	4.48234	7.51064	7.69996	7.3268	7.66461	7.58734	6.37725	7.88173	6.60292	6.57618	4.88636	4.19528	4.68044	7.02826	6.2463	5.25946	5.43086	6.62303	8.33099	8.51436	8.09865	7.84294	8.18342	8.28985	7.89923	7.89542	7.75129	8.51971	8.72439	8.38079	8.76395	8.45601	8.77015	8.20497
Cdc2a	12534	1448314_at	cell division cycle 2 homolog A (S. pombe)	1	GO:0000074 (regulation of progression through cell cycle),GO:0006468 (protein amino acid phosphorylation),GO:0006916 (anti-apoptosis),GO:0007049 (cell cycle),GO:0007067 (mitosis),GO:0007089 (traversing start control point of mitotic cell cycle),GO:0007095 (mitotic G2 checkpoint),GO:0051301 (cell division)	GO:0005634 (nucleus),GO:0005876 (spindle microtubule),GO:0030496 (midbody)	GO:0000166 (nucleotide binding),GO:0004672 (protein kinase activity),GO:0004674 (protein serine/threonine kinase activity),GO:0004693 (cyclin-dependent protein kinase activity),GO:0004713 (protein-tyrosine kinase activity),GO:0005515 (protein binding),GO:0005524 (ATP binding),GO:0016301 (kinase activity),GO:0016740 (transferase activity),GO:0030544 (Hsp70 protein binding)	9.91221	9.73847	9.21655	9.93683	9.83232	9.56824	8.57428	7.71268	7.41204	9.8135	9.77709	9.26035	9.74919	9.60701	8.60799	9.84109	9.50776	9.52281	8.68303	7.88791	7.59435	9.49226	9.11981	8.23209	7.85908	9.64205	10.4724	10.6036	10.4732	10.4782	10.5018	10.461	10.3782	10.442	10.1462	10.5139	10.1598	9.77472	10.295	9.87915	9.90533	9.94672
Cdc42ep2	104252	1428750_at	CDC42 effector protein (Rho GTPase binding) 2	15	GO:0007015 (actin filament organization),GO:0008360 (regulation of cell shape),GO:0030838 (positive regulation of actin filament polymerization),GO:0031274 (positive regulation of pseudopodium formation),GO:0031334 (positive regulation of protein complex assembly)	GO:0005737 (cytoplasm),GO:0005856 (cytoskeleton),GO:0005886 (plasma membrane),GO:0016020 (membrane)	GO:0001515 (opioid peptide activity),GO:0005100 (Rho GTPase activator activity),GO:0005515 (protein binding),GO:0017049 (GTP-Rho binding)	8.64121	10.0014	10.1403	5.54142	7.32261	9.25717	8.76588	7.80361	8.40457	7.89115	9.40209	10.268	6.22854	7.84618	8.69364	4.92929	8.23075	10.1891	8.49504	8.11513	8.6669	9.17367	8.09651	7.08193	7.99863	6.71131	5.83762	6.987	8.33121	6.19324	6.11911	6.15207	5.59333	6.10651	7.11057	6.02284	7.52996	9.30093	7.36784	9.61213	5.64104	6.26121
Cdc42ep3	260409	1450700_at	CDC42 effector protein (Rho GTPase binding) 3	16	GO:0008360 (regulation of cell shape)	GO:0005856 (cytoskeleton),GO:0015629 (actin cytoskeleton)	GO:0005515 (protein binding)	8.61485	7.65524	6.43445	8.69978	8.61242	8.18989	6.79629	4.46905	4.1594	8.33156	7.83271	6.99582	8.67946	8.49312	8.27317	8.68017	8.08459	8.02433	6.05974	4.04212	4.0008	7.82279	8.22102	7.79986	6.44135	7.98132	8.36312	8.5414	8.19622	8.27989	8.35511	8.60885	8.25949	8.1867	8.09328	8.618	7.58539	7.36371	8.16581	7.43372	8.32868	8.44569
Cdca2	108912	1455983_at	cell division cycle associated 2	3	GO:0008150 (biological_process),GO:0051301 (cell division)	GO:0005575 (cellular_component)	GO:0003674 (molecular_function)	7.17012	6.19689	6.29707	7.65247	7.29333	6.19481	5.52044	5.43841	5.36561	7.34847	6.45667	6.42112	7.20615	6.62849	5.1318	7.32982	6.99416	6.53202	5.62798	6.01484	5.44956	6.94077	5.70608	6.08499	5.32931	7.05247	7.91939	8.14446	7.86669	7.78939	7.93545	7.67418	7.8318	7.9032	7.69602	7.99765	7.71282	6.91821	7.68532	7.25016	7.4153	7.5265
Cdca3	14793	1452040_a_at	cell division cycle associated 3	1	GO:0008150 (biological_process),GO:0051301 (cell division)	GO:0005575 (cellular_component)	GO:0003674 (molecular_function)	9.63532	9.33906	8.8447	9.39616	9.41753	9.13227	8.21787	7.40259	6.62373	9.44514	9.42448	9.02771	9.27238	9.14351	8.37496	9.51053	8.3608	8.59943	8.0751	7.34659	6.89885	8.80912	8.48146	7.84153	7.31826	8.62356	10.1339	10.1958	10	9.6801	9.79761	9.80917	9.92776	9.94379	9.58626	10.2282	9.88497	9.48837	10.0567	9.71044	9.53558	9.94454
Cdca5	67849	1416802_a_at	cell division cycle associated 5	3	GO:0000082 (G1/S transition of mitotic cell cycle),GO:0007049 (cell cycle),GO:0007067 (mitosis),GO:0007076 (mitotic chromosome condensation),GO:0007080 (mitotic metaphase plate congression),GO:0051301 (cell division),GO:0051329 (interphase of mitotic cell cycle)	GO:0005634 (nucleus),GO:0005737 (cytoplasm),GO:0008278 (cohesin complex)	GO:0003682 (chromatin binding),GO:0005515 (protein binding)	8.68024	7.86725	7.38841	8.95735	8.42792	7.52308	5.20181	5.94192	5.97025	8.43976	8.13461	7.53427	8.21884	7.98039	6.29696	8.70194	8.84882	8.74622	6.95358	6.34269	6.22818	8.91623	7.80692	7.17788	7.31637	9.05086	9.7796	9.90018	9.6478	9.68361	9.71656	9.73119	9.74729	9.72791	9.36874	9.88842	8.56058	7.99907	8.74921	8.32635	8.35957	8.98367
Cdca7l	217946	1451306_at	cell division cycle associated 7 like	16	GO:0006350 (transcription),GO:0006355 (regulation of transcription, DNA-dependent),GO:0008284 (positive regulation of cell proliferation)	GO:0005634 (nucleus)	GO:0005515 (protein binding)	8.12645	7.97451	7.24457	8.6359	8.24054	7.89856	6.59688	5.6285	5.61661	8.28736	8.1417	7.49546	8.24818	8.06371	7.4613	8.39022	8.38239	8.19108	6.9927	6.02645	5.52604	8.48405	7.75772	6.98236	7.16081	8.43887	8.59946	8.57232	8.36621	8.4626	8.64583	8.32601	8.28751	8.20574	8.15978	8.3507	8.13179	7.67941	8.29554	7.73359	8.06451	8.12834
Cdca8	52276	1428480_at	cell division cycle associated 8	3	GO:0007049 (cell cycle),GO:0007067 (mitosis),GO:0008150 (biological_process),GO:0051301 (cell division)	GO:0000775 (chromosome, pericentric region),GO:0005575 (cellular_component),GO:0005634 (nucleus),GO:0005694 (chromosome),GO:0043234 (protein complex)	GO:0003674 (molecular_function),GO:0005515 (protein binding)	7.92128	7.90183	7.63872	7.93654	7.72545	7.41427	6.5809	6.18628	5.9783	7.69897	7.93736	7.75005	7.79738	7.63847	6.98186	7.83145	7.52719	7.68981	6.95511	6.32162	6.14542	7.66939	7.35462	6.33681	6.15134	7.64081	8.59936	8.65544	8.4667	8.50065	8.38059	8.70744	8.5366	8.58752	8.20421	8.67033	8.11582	8.12578	8.41543	8.19628	7.96291	8.16494
Cdk2	12566	1416873_a_at	cyclin-dependent kinase 2	3	GO:0000086 (G2/M transition of mitotic cell cycle),GO:0006275 (regulation of DNA replication),GO:0006468 (protein amino acid phosphorylation),GO:0007049 (cell cycle),GO:0007067 (mitosis),GO:0007089 (traversing start control point of mitotic cell cycle),GO:0008284 (positive regulation of cell proliferation),GO:0045941 (positive regulation of transcription),GO:0051301 (cell division)	GO:0000307 (cyclin-dependent protein kinase holoenzyme complex),GO:0005634 (nucleus),GO:0005667 (transcription factor complex),GO:0005737 (cytoplasm)	GO:0000166 (nucleotide binding),GO:0004672 (protein kinase activity),GO:0004674 (protein serine/threonine kinase activity),GO:0004693 (cyclin-dependent protein kinase activity),GO:0005515 (protein binding),GO:0005524 (ATP binding),GO:0016301 (kinase activity),GO:0016740 (transferase activity)	8.49123	8.09099	7.68694	8.07287	8.40128	8.28351	6.89752	6.29073	6.22098	7.90428	8.0421	7.64647	8.284	8.20373	7.34759	8.49806	8.14245	7.95405	6.38686	6.52162	6.41844	7.96162	7.00076	6.5975	6.86605	8.151	8.78896	8.80935	8.63011	9.00267	8.84266	8.91539	8.66896	8.82682	8.58453	8.77456	8.13952	8.4018	8.24657	7.89561	8.19318	8.32723
Cdk2ap1	13445	1426885_a_at	CDK2 (cyclin-dependent kinase 2)-associated protein 1	10	GO:0000084 (S phase of mitotic cell cycle),GO:0006261 (DNA-dependent DNA replication),GO:0006468 (protein amino acid phosphorylation),GO:0007049 (cell cycle),GO:0045786 (negative regulation of progression through cell cycle)	GO:0005634 (nucleus),GO:0005737 (cytoplasm)	GO:0003677 (DNA binding),GO:0004871 (signal transducer activity)	8.05463	8.10673	8.09039	8.38719	8.2894	8.06202	7.44182	7.23435	7.10812	8.23897	8.5226	8.41878	8.09617	7.95327	7.73228	8.43319	8.63433	8.37529	7.8706	7.38052	7.04682	8.2059	7.95017	7.725	7.53076	8.836	8.99281	8.96592	8.69583	8.95146	9.14903	9.09651	8.82821	8.79952	8.39181	8.82237	8.75035	8.43527	8.52375	8.26967	8.65241	8.63984
Cdk2ap2	52004	1417161_at	CDK2-associated protein 2	12				8.26355	7.96156	8.33621	8.00843	8.15793	7.95863	7.81874	8.57567	8.46312	7.77065	8.14937	8.19852	8.2215	8.28683	7.86971	8.17437	8.31907	8.29618	8.38554	8.52842	8.78638	8.48743	8.26359	7.81874	8.2236	8.3494	8.38841	8.21815	8.27613	8.43052	8.48573	8.39161	8.28665	8.22984	7.9644	8.38706	8.36601	7.79482	8.35371	7.99139	7.86462	8.50313
Cdk5rap3	80280	1423067_at	CDK5 regulatory subunit associated protein 3	2	GO:0000079 (regulation of cyclin-dependent protein kinase activity),GO:0007420 (brain development),GO:0008150 (biological_process),GO:0008283 (cell proliferation),GO:0045664 (regulation of neuron differentiation)	GO:0005575 (cellular_component)	GO:0003674 (molecular_function),GO:0005515 (protein binding),GO:0042808 (neuronal Cdc2-like kinase binding)	7.80077	7.65172	7.6588	7.90094	7.85815	7.70329	7.37342	7.21417	7.28803	7.75205	7.77482	7.73475	7.84137	7.68675	7.64904	7.92312	7.99993	7.85786	7.6854	7.55705	7.51499	8.03138	7.96484	7.74238	7.68289	8.03474	8.14444	8.11281	7.93833	8.22103	8.19864	8.10018	7.94596	8.12412	7.95631	8.12991	8.11106	7.82605	7.77208	7.80527	7.77454	8.02045
Cdkn2b	12579	1449152_at	cyclin-dependent kinase inhibitor 2B (p15, inhibits CDK4)	21	GO:0000079 (regulation of cyclin-dependent protein kinase activity),GO:0006355 (regulation of transcription, DNA-dependent),GO:0007049 (cell cycle),GO:0007050 (cell cycle arrest),GO:0008285 (negative regulation of cell proliferation),GO:0045786 (negative regulation of progression through cell cycle)		GO:0003677 (DNA binding),GO:0003700 (transcription factor activity),GO:0004861 (cyclin-dependent protein kinase inhibitor activity),GO:0005515 (protein binding),GO:0016301 (kinase activity)	6.21086	6.97475	8.06502	5.99868	5.98322	6.64325	7.49548	7.09102	6.97185	5.78887	6.77893	7.79266	5.88881	6.28667	7.11604	5.5636	7.33655	7.27876	7.2401	6.63176	6.34482	7.12294	6.67368	5.92873	6.29754	7.17481	5.80421	5.95838	6.40811	6.32227	6.15381	6.10917	6.03535	6.05146	6.2604	5.78236	5.86449	5.74894	5.49201	6.03402	6.00719	5.69346
Cdkn2c	12580	1416868_at	cyclin-dependent kinase inhibitor 2C (p18, inhibits CDK4)	3	GO:0006355 (regulation of transcription, DNA-dependent),GO:0007049 (cell cycle),GO:0007050 (cell cycle arrest),GO:0008285 (negative regulation of cell proliferation)	GO:0005634 (nucleus),GO:0005737 (cytoplasm)	GO:0003677 (DNA binding),GO:0003700 (transcription factor activity),GO:0004861 (cyclin-dependent protein kinase inhibitor activity),GO:0016301 (kinase activity)	9.95899	9.60758	8.77675	9.71239	9.99487	9.6404	8.01768	6.68953	6.18902	9.59864	9.80113	9.03055	9.90501	9.73005	8.56239	10.1516	8.96021	8.95907	7.73425	6.70814	6.86391	8.9599	8.66442	7.64906	7.72591	9.19139	10.7217	10.7539	10.6713	10.4887	10.6505	10.6133	10.5358	10.5382	10.099	10.814	10.4236	10.6446	10.6807	10.3117	10.9219	10.5847
Cdkn3	72391	1430574_at	cyclin-dependent kinase inhibitor 3	1	GO:0006470 (protein amino acid dephosphorylation),GO:0007050 (cell cycle arrest),GO:0016311 (dephosphorylation)	GO:0005575 (cellular_component)	GO:0004721 (phosphoprotein phosphatase activity),GO:0004722 (protein serine/threonine phosphatase activity),GO:0004725 (protein tyrosine phosphatase activity),GO:0016301 (kinase activity),GO:0016791 (phosphoric monoester hydrolase activity)	8.41591	8.26785	8.02236	8.34546	8.09509	7.97438	7.28671	6.32568	5.69276	8.0273	8.29918	7.99628	8.16247	7.9371	7.57964	8.16308	7.1633	7.36958	6.7998	6.30382	6.07729	7.39757	7.27705	6.79134	6.04163	7.32889	8.54972	8.54288	8.45688	8.00849	8.07363	8.17793	8.32598	8.349	8.07781	8.77449	8.07948	8.07751	8.55633	8.45733	7.81291	8.73049
Cds1	74596	1428680_at	CDP-diacylglycerol synthase 1	29	GO:0006629 (lipid metabolic process),GO:0007165 (signal transduction),GO:0007601 (visual perception),GO:0008654 (phospholipid biosynthetic process),GO:0016024 (CDP-diacylglycerol biosynthetic process)	GO:0005783 (endoplasmic reticulum),GO:0016020 (membrane),GO:0016021 (integral to membrane)	GO:0000287 (magnesium ion binding),GO:0004142 (diacylglycerol cholinephosphotransferase activity),GO:0004605 (phosphatidate cytidylyltransferase activity),GO:0016740 (transferase activity),GO:0016779 (nucleotidyltransferase activity)	7.22161	7.21178	7.08344	7.39954	6.9907	7.04145	7.62664	7.96446	7.72159	7.0747	7.35513	7.29442	7.26542	7.40599	7.81262	7.21158	6.91555	7.1434	7.75782	8.07299	7.62747	7.04639	8.2399	8.71439	8.57354	7.07382	6.84171	7.14706	6.84836	6.83648	7.12762	6.94897	6.99602	7.02086	6.902	7.19899	6.63863	6.66753	7.27171	6.97757	6.95664	6.95042
Cdt1	67177	1424144_at	chromatin licensing and DNA replication factor 1	19	GO:0000076 (DNA replication checkpoint),GO:0006260 (DNA replication),GO:0007049 (cell cycle),GO:0007090 (regulation of S phase of mitotic cell cycle),GO:0030174 (regulation of DNA replication initiation)	GO:0005634 (nucleus),GO:0005657 (replication fork)	GO:0003677 (DNA binding),GO:0005515 (protein binding)	8.71719	8.10739	7.20873	9.27782	8.96366	8.59978	6.45959	7.59056	8.525	8.8319	8.80615	7.80267	8.71478	8.23332	6.34619	9.22418	9.62517	8.90169	7.06049	7.38903	8.16766	9.36125	7.4638	7.94232	8.57288	9.81564	9.96197	10.062	9.67087	10.0067	10.1556	10.168	9.62039	9.69791	9.2705	9.68666	9.20686	8.78152	8.79062	8.52265	9.09435	9.30339
Cebpd	12609	1423233_at	CCAAT/enhancer binding protein (C/EBP), delta	17	GO:0006350 (transcription),GO:0006355 (regulation of transcription, DNA-dependent)	GO:0005634 (nucleus)	GO:0003677 (DNA binding),GO:0003700 (transcription factor activity),GO:0005515 (protein binding),GO:0042803 (protein homodimerization activity),GO:0043565 (sequence-specific DNA binding),GO:0046982 (protein heterodimerization activity),GO:0046983 (protein dimerization activity)	9.67648	10.9722	11.6008	9.12608	9.27694	10.7268	12.2354	11.9372	11.0856	9.1165	10.9118	11.4926	8.81357	9.09262	10.109	9.23081	7.80316	9.81797	11.7912	11.5216	10.4609	8.05513	9.29048	8.61573	7.22994	8.12269	8.08015	8.26658	7.40592	8.14623	8.27553	8.21326	7.98709	7.7285	7.12412	8.24417	7.92908	8.81944	7.88051	8.8822	8.11908	7.78031
Cebpz	12607	1420497_a_at	CCAAT/enhancer binding protein zeta	4	GO:0006350 (transcription),GO:0006355 (regulation of transcription, DNA-dependent),GO:0006366 (transcription from RNA polymerase II promoter)	GO:0005634 (nucleus)	GO:0003677 (DNA binding),GO:0005488 (binding)	7.68263	7.41833	7.26337	7.63882	7.35834	7.20531	6.21486	5.82212	5.77629	7.6408	7.55703	7.38915	7.58647	7.56451	6.94963	7.59576	7.72207	7.61699	6.43847	6.06487	5.57053	7.54821	7.09316	5.91999	5.28311	7.69609	7.33258	7.4296	7.18741	7.21371	7.42116	7.42859	7.3124	7.1019	6.93265	7.30664	6.69789	6.96709	6.93805	6.64793	6.57184	7.13034
Cenpa	12615	1450842_a_at	centromere protein A	1	GO:0006334 (nucleosome assembly),GO:0007001 (chromosome organization and biogenesis (sensu Eukaryota))	GO:0000775 (chromosome, pericentric region),GO:0000786 (nucleosome),GO:0000939 (inner kinetochore of condensed chromosome),GO:0005634 (nucleus),GO:0005694 (chromosome)	GO:0003677 (DNA binding)	9.89505	9.52547	9.10186	9.51767	9.6698	9.302	8.13621	6.58965	6.27315	9.67835	9.69676	9.34408	9.54775	9.37101	8.38768	9.8427	8.30629	8.34311	7.57806	6.95393	6.82692	8.56208	8.29646	7.50216	7.08692	8.57972	10.0416	9.93918	9.79497	9.52773	9.57824	9.58008	9.80448	9.66097	9.39368	10.2145	9.77301	9.50756	10.0295	9.88937	9.45554	10.1302
Cenpe	229841	1435005_at	centromere protein E	1	GO:0007018 (microtubule-based movement),GO:0008608 (attachment of spindle microtubules to kinetochore)	GO:0000775 (chromosome, pericentric region),GO:0000776 (kinetochore),GO:0005874 (microtubule),GO:0005875 (microtubule associated complex)	GO:0000166 (nucleotide binding),GO:0003774 (motor activity),GO:0003777 (microtubule motor activity),GO:0005524 (ATP binding)	8.63027	8.3618	7.85539	8.70708	8.24666	8.15755	8.2388	8.15166	7.72745	8.39606	8.32774	8.03701	8.15207	8.25727	8.15877	8.15206	8.04771	8.21406	8.71942	8.31712	7.78567	8.25653	9.10146	8.86028	7.89155	8.08443	8.75104	8.87568	8.89098	8.2927	8.66027	8.56253	8.63876	8.58426	8.72221	8.89117	8.38317	8.26501	8.95742	8.67232	8.18892	8.3798
Cenpf	108000	1427161_at	centromere protein F	1	GO:0000085 (G2 phase of mitotic cell cycle),GO:0000087 (M phase of mitotic cell cycle),GO:0000278 (mitotic cell cycle),GO:0007059 (chromosome segregation),GO:0007094 (mitotic spindle checkpoint),GO:0016202 (regulation of striated muscle development),GO:0016481 (negative regulation of transcription),GO:0051310 (metaphase plate congression),GO:0051382 (kinetochore assembly)	GO:0000775 (chromosome, pericentric region),GO:0000776 (kinetochore),GO:0000785 (chromatin),GO:0000922 (spindle pole),GO:0000940 (outer kinetochore of condensed chromosome),GO:0005634 (nucleus),GO:0005635 (nuclear envelope),GO:0005737 (cytoplasm),GO:0016363 (nuclear matrix),GO:0045120 (pronucleus)	GO:0003674 (molecular_function),GO:0003682 (chromatin binding),GO:0005515 (protein binding),GO:0008022 (protein C-terminus binding),GO:0008134 (transcription factor binding),GO:0042803 (protein homodimerization activity),GO:0045502 (dynein binding),GO:0046982 (protein heterodimerization activity)	8.10951	8.01957	7.3371	8.29137	7.86722	7.61945	5.42388	4.31169	4.37322	8.02655	8.06985	7.64226	7.65127	7.50786	6.36417	7.85673	7.28928	7.43665	5.82745	4.94036	4.05403	7.32544	6.52147	5.35228	4.70971	7.33395	8.48171	8.54352	8.56327	8.02944	8.23973	8.27162	8.34279	8.3327	8.17998	8.68067	8.77149	8.83869	9.06586	8.89261	8.84607	8.51924
Cenph	26886	1422016_a_at	centromere protein H	1	GO:0007059 (chromosome segregation),GO:0007067 (mitosis),GO:0051383 (kinetochore organization and biogenesis)	GO:0000775 (chromosome, pericentric region),GO:0000776 (kinetochore),GO:0005634 (nucleus),GO:0005694 (chromosome)	GO:0005515 (protein binding),GO:0043515 (kinetochore binding)	6.93152	6.45722	6.15511	6.87043	6.53298	6.22714	5.52599	5.05532	4.7294	6.20191	6.60306	6.02944	6.25505	6.21502	5.97126	6.77616	6.44879	6.62602	5.84546	5.46725	4.92957	6.67251	6.53385	5.9989	5.35505	6.74021	7.28515	7.3447	6.9484	7.22248	7.25507	7.19944	7.272	7.13939	6.8423	7.15565	6.5435	6.04403	6.84492	6.42996	6.40022	6.54729
Cenpi	102920	1436723_at	centromere protein I	1	GO:0007283 (spermatogenesis),GO:0007292 (female gamete generation),GO:0007548 (sex differentiation)	GO:0000775 (chromosome, pericentric region),GO:0005634 (nucleus),GO:0005694 (chromosome)		7.48034	7.14898	6.97889	7.44173	7.21277	7.17202	6.56866	5.72515	5.66974	7.22297	7.28905	7.03154	6.96239	6.90231	6.31853	7.38641	7.17616	7.51342	6.86551	6.25522	5.64174	7.29574	7.0747	6.35984	5.51887	7.37427	8.01765	8.17005	7.96929	7.95498	7.94183	8.11938	7.99071	7.82148	7.78065	7.98771	7.57917	7.54048	7.86397	7.68796	7.42444	7.45948
Cenpm	66570	1418184_at	centromere protein M	1		GO:0000775 (chromosome, pericentric region),GO:0005634 (nucleus),GO:0005694 (chromosome)		6.64622	6.66608	6.51901	6.72987	6.74691	6.67643	6.32949	6.16256	5.95479	6.75678	6.55962	6.29503	6.71342	6.37753	6.09574	6.74534	6.50879	6.69821	6.72656	6.25649	6.02407	6.47269	6.44377	6.21948	6.46069	6.69484	7.55241	7.42082	7.40137	7.25979	7.5296	7.36744	7.20078	7.1047	6.95168	7.33546	7.42876	6.93237	6.95852	6.89694	7.31205	7.13754
Cenpp	66336	1429095_at	centromere protein P	1		GO:0000775 (chromosome, pericentric region),GO:0005634 (nucleus),GO:0005694 (chromosome)		6.38134	6.15423	6.00497	6.55231	6.18761	6.07101	5.49783	5.49969	4.87042	6.22484	6.39436	6.0055	6.13413	5.91216	5.63758	6.1796	6.04128	6.3874	6.31551	5.53808	5.11322	6.37656	6.4086	6.21897	5.25311	6.19582	6.95598	7.01108	6.91032	6.72276	7.02532	6.82167	6.93545	6.70933	6.70066	7.10102	6.8767	6.60208	6.93482	6.74394	6.51335	6.66542
Cenpq	83815	1423620_at	centromere protein Q	1		GO:0000775 (chromosome, pericentric region),GO:0005634 (nucleus),GO:0005694 (chromosome)		8.21198	7.83993	7.26067	7.98625	7.82679	7.70934	6.70538	5.35847	5.58212	7.62385	7.7792	7.35906	7.70173	7.44528	6.81758	7.97502	7.8069	7.75784	6.88083	6.42743	6.36914	7.72856	7.41142	6.70027	6.27273	7.78987	8.52346	8.51182	8.36496	8.26953	8.39689	8.37616	8.40795	8.43439	8.20499	8.50453	8.60129	8.59662	8.55179	8.47294	8.59446	7.95218
Cenpt	320394	1426846_at	centromere protein T	20		GO:0000775 (chromosome, pericentric region),GO:0005634 (nucleus),GO:0005694 (chromosome)		7.6391	7.56654	8.12467	7.55736	7.34514	7.4548	7.50891	7.87482	7.63656	7.52886	7.88762	8.15856	7.17999	7.06948	7.25179	7.46006	7.56101	7.82632	7.75137	7.80194	7.705	7.67346	7.66228	7.70333	7.60938	7.69353	7.94578	8.11949	7.76749	7.9134	7.77381	7.92372	7.62624	7.76595	7.45806	7.99632	7.83846	7.65145	7.83262	7.74228	7.46153	7.71204
Centd1	212285	1452291_at	centaurin, delta 1	18	GO:0007165 (signal transduction),GO:0008150 (biological_process),GO:0043087 (regulation of GTPase activity)	GO:0005575 (cellular_component),GO:0005622 (intracellular)	GO:0003674 (molecular_function),GO:0005096 (GTPase activator activity),GO:0005547 (phosphatidylinositol-3,4,5-triphosphate binding),GO:0008270 (zinc ion binding),GO:0046872 (metal ion binding)	8.4434	8.22236	7.5915	8.66022	8.13296	8.08902	7.23953	6.94119	7.01002	8.31517	8.13264	7.70898	8.34582	8.31827	7.85935	8.02432	7.3979	7.7243	7.0405	6.08444	5.59885	7.51911	7.47184	7.25674	5.97127	7.31902	7.03209	7.28683	7.03003	6.90539	7.24395	7.2091	7.38113	7.38955	7.3739	7.312	7.00285	7.13473	7.36848	6.69972	7.14823	7.03167
Centg2	347722	1435432_at	centaurin, gamma 2	4	GO:0006810 (transport),GO:0007264 (small GTPase mediated signal transduction),GO:0008150 (biological_process),GO:0015031 (protein transport),GO:0043087 (regulation of GTPase activity)	GO:0005622 (intracellular),GO:0005829 (cytosol)	GO:0000166 (nucleotide binding),GO:0003924 (GTPase activity),GO:0005096 (GTPase activator activity),GO:0005525 (GTP binding),GO:0008270 (zinc ion binding),GO:0046872 (metal ion binding)	5.69864	6.09292	5.95877	5.82012	5.55946	5.67474	5.17845	5.40473	4.43637	6.01109	6.21978	6.12686	6.21387	6.07176	6.01473	5.57751	7.33445	7.41939	6.82186	5.8973	4.75425	7.02561	7.03154	6.16254	4.79003	7.23427	6.74437	7.05248	6.96086	7.0994	7.39129	7.29714	7.00197	6.59718	6.66097	6.77558	6.55438	6.28759	6.63897	6.47745	6.36808	6.61981
Cep55	74107	1452242_at	centrosomal protein 55	1	GO:0007049 (cell cycle),GO:0007067 (mitosis),GO:0051301 (cell division)			8.84893	8.33747	7.48514	8.23963	8.62238	8.26703	6.66475	4.49526	4.55048	8.40829	8.38825	7.80901	8.35215	8.03703	7.04346	8.63424	7.69826	7.86735	6.64519	5.69726	5.29079	7.69358	7.55861	6.58939	5.55687	7.73056	9.03242	9.24814	9.03746	8.82878	8.74567	8.81528	8.84439	8.77878	8.78142	9.17016	9.13284	9.19462	9.49904	9.06007	9.22642	8.66921
Cept1	99712	1459406_at	Choline/ethanolaminephosphotransferase 1	8	GO:0008654 (phospholipid biosynthetic process)	GO:0005789 (endoplasmic reticulum membrane),GO:0016020 (membrane)	GO:0016740 (transferase activity),GO:0016780 (phosphotransferase activity, for other substituted phosphate groups)	4.36547	4.47748	4.20126	4.05899	4.07386	5.02729	5.6127	6.33185	6.10143	4.58852	4.67374	4.69171	3.77932	4.87034	4.84457	3.95954	3.78031	4.89946	5.86998	5.78	5.87439	4.69503	5.74487	5.14857	5.09439	3.91763	3.77365	3.57547	3.86691	3.80304	3.72224	3.97527	3.82534	3.8257	4.18898	3.89032	3.84876	4.53891	4.33022	4.31905	4.21903	3.70053
Cerk	223753	1434034_at	ceramide kinase	14	GO:0006672 (ceramide metabolic process),GO:0007205 (protein kinase C activation)	GO:0000299 (integral to membrane of membrane fraction),GO:0005624 (membrane fraction)	GO:0000287 (magnesium ion binding),GO:0001729 (ceramide kinase activity),GO:0004143 (diacylglycerol kinase activity),GO:0004685 (calcium- and calmodulin-dependent protein kinase activity),GO:0005509 (calcium ion binding),GO:0016301 (kinase activity),GO:0016740 (transferase activity)	9.56021	9.18695	8.16573	10.1145	9.57315	9.02559	6.53966	5.80417	7.25612	9.61745	9.39554	8.39525	10.0374	9.68224	8.23719	9.8626	9.3295	8.9298	7.15809	5.89427	7.41255	9.43355	7.90539	6.97765	8.2593	9.44999	9.29199	9.46036	8.96719	9.22363	9.50775	9.37158	9.16837	9.22149	8.68163	9.48984	9.42388	8.97548	9.82274	9.37265	9.52846	9.70338
Cfb	14962	1417314_at	complement factor B	9	GO:0006508 (proteolysis),GO:0006955 (immune response),GO:0006956 (complement activation),GO:0006957 (complement activation, alternative pathway),GO:0008283 (cell proliferation),GO:0045087 (innate immune response)	GO:0005576 (extracellular region)	GO:0001848 (complement binding),GO:0003812 (alternative-complement-pathway C3/C5 convertase activity),GO:0004252 (serine-type endopeptidase activity),GO:0004263 (chymotrypsin activity),GO:0004295 (trypsin activity),GO:0008233 (peptidase activity),GO:0016787 (hydrolase activity)	4.63279	4.81159	6.0019	4.43429	4.70622	4.86147	8.13545	10.1653	10.317	5.09577	4.82995	5.18323	4.73317	4.82289	6.52031	4.47893	4.47642	5.06959	8.00464	9.28097	9.73251	5.51957	7.25218	8.04193	8.5511	4.53323	4.63158	4.82774	4.52212	4.4716	4.40909	4.47211	4.40793	5.21373	5.11191	4.61374	5.33264	4.81019	4.31806	4.61252	4.33459	4.6263
Cflar	12633	1449317_at	CASP8 and FADD-like apoptosis regulator	28	GO:0006508 (proteolysis),GO:0006915 (apoptosis),GO:0006917 (induction of apoptosis),GO:0042981 (regulation of apoptosis),GO:0043066 (negative regulation of apoptosis),GO:0043154 (negative regulation of caspase activity)	GO:0005737 (cytoplasm)	GO:0005515 (protein binding),GO:0030693 (caspase activity)	9.55735	9.69902	10.1086	7.50094	9.56454	10.6516	10.7847	10.4092	10.363	8.65358	9.33966	9.737	8.57916	9.28279	10.1202	6.67355	9.49199	10.2332	10.6896	10.5184	10.3031	8.92751	9.69587	9.69073	9.32285	6.96598	7.01194	9.35943	10.318	6.34633	6.91406	6.61936	6.97445	7.78928	10.2638	6.97438	8.04425	8.72621	8.73012	9.31282	6.50495	7.03957
Cggbp1	106143	1455658_at	CGG triplet repeat binding protein 1	24	GO:0006350 (transcription),GO:0006355 (regulation of transcription, DNA-dependent),GO:0008150 (biological_process)	GO:0005634 (nucleus)	GO:0003677 (DNA binding),GO:0003690 (double-stranded DNA binding)	8.67463	9.12388	8.96779	8.07269	8.64942	9.68357	9.7946	9.86708	9.66958	8.46782	8.97085	8.87358	8.24506	9.24198	9.68119	8.15769	8.90961	9.91506	10.056	9.91272	9.97724	8.78157	9.60523	9.60666	9.5435	8.52129	8.45194	8.45668	9.05686	8.32983	8.35464	8.38337	8.2281	8.1687	8.45705	8.34316	8.09534	8.23379	8.31036	8.63661	7.5804	8.40681
Chaf1b	110749	1423877_at	chromatin assembly factor 1, subunit B (p60)	3	GO:0006260 (DNA replication),GO:0006281 (DNA repair),GO:0006335 (DNA replication-dependent nucleosome assembly),GO:0006350 (transcription),GO:0006355 (regulation of transcription, DNA-dependent),GO:0006461 (protein complex assembly),GO:0006974 (response to DNA damage stimulus),GO:0007049 (cell cycle)	GO:0005634 (nucleus),GO:0005678 (chromatin assembly complex),GO:0005737 (cytoplasm)	GO:0003682 (chromatin binding),GO:0042393 (histone binding),GO:0051082 (unfolded protein binding)	7.92347	7.87466	7.37849	8.13903	8.03359	7.82796	6.97871	6.21005	6.2964	8.16912	8.18769	7.59825	7.84324	7.91187	7.33366	7.87106	8.21256	8.38853	7.28749	5.93585	5.78922	8.19519	7.64666	6.60676	6.15536	8.28224	8.60557	8.6768	8.59731	8.47159	8.5821	8.7075	8.25798	8.22111	8.12504	8.41211	7.79075	7.2988	7.42675	7.27043	7.2671	7.68504
Chd1l	68058	1449415_at	chromodomain helicase DNA binding protein 1-like	4			GO:0000166 (nucleotide binding),GO:0003676 (nucleic acid binding),GO:0003677 (DNA binding),GO:0004386 (helicase activity),GO:0005524 (ATP binding),GO:0008026 (ATP-dependent helicase activity),GO:0016787 (hydrolase activity)	6.60752	6.38531	6.4472	6.99607	6.57055	6.38698	6.06173	5.34837	5.17693	6.36061	6.60003	6.58103	6.23341	6.15778	5.54136	6.42254	7.03005	7.07599	6.39382	5.64444	5.33259	6.9323	6.2818	5.53385	5.09066	7.17486	6.62874	6.66243	6.54887	6.45983	6.84491	6.73318	6.35571	6.29624	5.92879	6.41963	6.36578	6.50155	6.75443	6.589	6.73655	6.37758
Chmp4b	75608	1426240_at	chromatin modifying protein 4B	6	GO:0006810 (transport),GO:0015031 (protein transport)			10.08	9.85148	9.92955	9.89303	10.1478	10.2836	10.7346	11.2405	11.2478	9.85145	9.9206	10.2031	9.94672	9.89191	10.7346	10.2722	10.0788	10.3969	10.7758	11.2173	11.2757	10.1675	10.8183	11.1103	11.2525	10.1749	9.8869	10.0605	9.99242	10.1397	9.96048	10.1698	9.92464	9.83897	9.57106	10.0098	10.2177	10.2268	9.95992	9.83174	10.1379	10.2007
Chordc1	66917	1460645_at	cysteine and histidine-rich domain (CHORD)-containing, zinc-binding protein 1	9			GO:0005509 (calcium ion binding),GO:0008270 (zinc ion binding)	8.83254	8.57918	8.5557	8.91577	8.72617	8.61574	8.34829	8.92192	9.07929	8.49142	8.62202	8.49814	8.6232	8.5697	8.19001	8.72453	8.94508	8.74451	8.61035	9.07575	9.25543	8.608	8.64578	8.91156	9.07104	8.87489	8.355	8.35291	8.35931	8.51419	8.56423	8.58967	8.52966	8.3756	8.23983	8.49819	8.20274	8.48041	8.52972	8.30569	8.33646	8.17413
Cirbp	12696	1416332_at	cold inducible RNA binding protein	2	GO:0009409 (response to cold)	GO:0005634 (nucleus)	GO:0000166 (nucleotide binding),GO:0003676 (nucleic acid binding),GO:0003723 (RNA binding)	7.62998	6.78667	6.8228	6.66592	7.50317	7.06657	6.12331	5.16304	5.00527	6.89247	6.99731	6.45001	7.03715	6.73829	6.53937	7.80169	6.48503	6.26085	4.90463	5.39832	5.02486	6.45156	6.32877	5.36133	5.06257	6.68477	8.05973	8.06371	7.73067	8.05527	7.9404	8.21788	7.90948	7.75152	7.40779	7.89421	6.76352	6.90345	6.89925	6.55595	7.09546	8.03406
Ckap2	80986	1434748_at	cytoskeleton associated protein 2	3	GO:0006915 (apoptosis),GO:0007049 (cell cycle),GO:0008150 (biological_process)	GO:0005575 (cellular_component),GO:0005874 (microtubule)	GO:0003674 (molecular_function)	7.95206	7.66963	6.54823	8.09542	7.9054	7.47033	5.74621	5.42076	5.29829	7.66731	7.50235	6.76101	7.80688	7.6109	6.25199	7.86637	7.17429	7.17918	5.89314	5.43746	5.32528	7.17291	6.60865	5.78916	5.32719	7.28565	8.3843	8.44977	8.23683	8.27149	8.19116	8.22032	8.41214	8.33441	8.04168	8.56997	8.00728	7.67499	8.36765	7.927	7.76725	8.39232
Ckap2l	70466	1453769_at	cytoskeleton associated protein 2-like	1				6.85615	6.87962	6.53138	6.42784	6.87887	6.9481	6.1972	5.65977	5.34795	6.35318	6.72458	6.22243	6.37671	6.39175	5.56187	6.76446	5.8813	6.36435	5.80649	5.89168	5.63938	6.19702	5.8062	4.98557	4.98693	5.95266	7.58399	7.53026	7.59962	7.27101	7.17406	7.33712	7.38583	7.30875	7.38081	7.67852	7.16697	6.86595	7.04138	7.15871	6.86045	7.03998
Ckb	12709	1455106_a_at	creatine kinase, brain	7		GO:0005737 (cytoplasm),GO:0005739 (mitochondrion)	GO:0000166 (nucleotide binding),GO:0004111 (creatine kinase activity),GO:0005524 (ATP binding),GO:0016301 (kinase activity),GO:0016740 (transferase activity),GO:0016772 (transferase activity, transferring phosphorus-containing groups)	10.6502	10.4895	10.5921	10.3013	10.726	10.5973	10.3071	10.2807	10.0482	10.4711	10.6472	10.7071	10.7667	10.8942	10.8049	10.8774	11.6412	11.5156	11.3615	11.1216	10.864	11.6902	11.4645	11.183	11.1138	11.7316	12.2502	12.0427	12.1135	12.4712	12.4427	12.327	11.8701	11.8657	11.5396	11.9544	11.2736	10.9916	10.5315	10.4608	10.9508	11.6868
Cks1b	54124	1448441_at	CDC28 protein kinase 1b	1	GO:0007049 (cell cycle),GO:0051301 (cell division)		GO:0016301 (kinase activity),GO:0016538 (cyclin-dependent protein kinase regulator activity)	9.58837	9.52518	9.36158	9.41363	9.33274	9.06622	8.44008	7.69527	7.31076	9.48374	9.53509	9.18088	9.38076	9.21357	8.44454	9.41502	8.80916	8.89409	8.31524	7.81497	7.26999	8.72992	8.43416	8.00494	7.51007	9.05401	9.82775	9.79253	9.68149	9.73223	9.70412	9.769	9.78345	9.75877	9.47547	9.81015	9.73427	9.42089	9.77322	9.42343	9.44461	9.51165
Cks2	66197	1417457_at	CDC28 protein kinase regulatory subunit 2	1	GO:0000079 (regulation of cyclin-dependent protein kinase activity),GO:0000910 (cytokinesis),GO:0007049 (cell cycle),GO:0007051 (spindle organization and biogenesis),GO:0007127 (meiosis I),GO:0008283 (cell proliferation),GO:0048015 (phosphoinositide-mediated signaling),GO:0051301 (cell division)		GO:0004693 (cyclin-dependent protein kinase activity),GO:0016301 (kinase activity),GO:0016538 (cyclin-dependent protein kinase regulator activity)	9.9231	9.87859	8.96646	9.27853	9.46927	9.62029	7.61529	7.45299	7.56986	9.36463	9.83899	9.37707	9.15214	9.22875	7.49084	8.92895	9.47809	9.59397	7.50959	7.3348	7.30982	9.06164	8.1806	7.52269	7.20072	9.08977	9.87857	10.0977	10.1915	9.59473	9.52718	9.48642	9.49962	9.42124	9.52117	9.85347	10.0273	10.3559	10.1207	10.2588	9.96625	9.50172
Clcn5	12728	1429400_at	chloride channel 5	20	GO:0006810 (transport),GO:0006811 (ion transport),GO:0006821 (chloride transport),GO:0006897 (endocytosis),GO:0007588 (excretion)	GO:0005887 (integral to plasma membrane),GO:0016020 (membrane),GO:0016021 (integral to membrane)	GO:0005216 (ion channel activity),GO:0005244 (voltage-gated ion channel activity),GO:0005247 (voltage-gated chloride channel activity),GO:0005254 (chloride channel activity),GO:0031404 (chloride ion binding)	8.36893	8.33609	8.3963	8.76304	8.37845	8.51946	8.45543	7.90357	7.54429	8.40163	8.2603	8.27005	8.02769	8.30017	8.44427	8.3457	8.42982	8.2809	8.47865	7.91628	7.483	8.33439	8.29294	7.65748	7.05945	8.35965	7.92852	7.87225	7.92504	8.29987	8.59782	8.38151	8.2641	8.31209	8.01712	8.19283	7.54771	7.90967	8.02454	7.86319	7.84551	8.04413
Cldnd1	224250	1431293_a_at	claudin domain containing 1	15		GO:0016020 (membrane),GO:0016021 (integral to membrane)		8.20461	9.1877	9.29639	7.44066	8.42452	8.95615	9.61657	9.25177	9.12544	9.04651	9.2045	9.82671	7.81703	8.6353	9.10474	7.66079	7.60129	7.90684	7.89944	8.146	7.89077	7.04279	8.17075	8.27006	7.806	7.28468	7.27918	7.38463	7.73822	7.35261	7.79784	7.89159	7.21876	7.05242	7.31724	7.11862	8.08988	8.46059	8.13719	8.19664	7.91661	7.31872
Clec1b	56760	1421182_at	C-type lectin domain family 1, member b	8	GO:0007166 (cell surface receptor linked signal transduction)	GO:0005887 (integral to plasma membrane),GO:0016020 (membrane),GO:0016021 (integral to membrane)	GO:0004872 (receptor activity),GO:0004888 (transmembrane receptor activity),GO:0005529 (sugar binding)	4.18403	4.15625	3.91517	3.89513	3.69312	3.85206	4.04433	5.36725	5.54023	3.63528	4.00933	4.40022	3.78936	4.13401	3.97009	3.8028	3.85418	3.69644	4.28735	5.00824	5.16436	4.10022	4.61693	4.95033	5.39885	3.98904	3.68582	3.94437	3.91497	3.53745	4.09782	3.83341	3.89845	3.91516	3.89787	3.85892	3.67408	3.44742	3.90632	3.54331	3.36405	3.86063
Clec2g	70809	1442074_at	C-type lectin domain family 2, member g	11	GO:0045671 (negative regulation of osteoclast differentiation)	GO:0005615 (extracellular space),GO:0016021 (integral to membrane)	GO:0005529 (sugar binding)	3.34907	4.41413	5.76779	3.15026	3.3213	3.63956	6.43186	7.20878	6.76321	3.65706	3.70576	5.31657	3.37126	3.2738	4.9692	3.12591	3.18173	3.35717	4.15641	4.47335	4.09679	3.04429	3.38278	3.36162	3.17416	3.02697	3.05898	3.11866	3.35787	3.27448	3.28502	2.99271	2.9641	3.08404	3.01824	3.10923	3.37126	3.42015	3.26454	3.51041	3.19539	3.08856
Clec4a2	26888	1422013_at	C-type lectin domain family 4, member a2	32	GO:0006955 (immune response)	GO:0005624 (membrane fraction),GO:0016020 (membrane),GO:0016021 (integral to membrane)	GO:0005529 (sugar binding)	8.19942	8.61643	9.70578	8.31264	7.96477	8.3074	8.54803	9.59255	9.66609	7.64323	8.65384	9.42164	8.13253	7.86752	7.16526	8.01564	9.62407	9.55536	9.81132	9.72611	9.7858	9.34272	9.003	8.49161	7.85599	9.68661	9.60061	9.5179	9.38782	9.22283	9.53302	9.46449	9.63994	9.58407	9.26282	9.81036	8.34558	8.65238	8.70447	8.89269	8.67503	9.89764
Clec4a3	73149	1429954_at	C-type lectin domain family 4, member a3	11			GO:0004872 (receptor activity),GO:0005529 (sugar binding)	9.15058	9.40912	10.0231	8.89809	8.87022	8.90243	9.15705	9.98136	10.2944	8.86177	9.29467	9.70547	9.00813	8.74057	8.69253	9.05583	8.10536	8.53707	9.35752	10.1248	10.4094	9.41695	9.15706	8.99686	9.4079	8.15604	8.49498	8.53078	8.35218	8.5481	8.58004	8.3908	8.632	8.51369	8.34501	8.8063	7.61459	7.84019	8.26478	7.95003	7.48181	9.35842
Clec4e	56619	1420331_at	C-type lectin domain family 4, member e	28	GO:0006955 (immune response),GO:0007157 (heterophilic cell adhesion),GO:0019735 (antimicrobial humoral response (sensu Vertebrata))	GO:0016020 (membrane),GO:0016021 (integral to membrane)	GO:0005529 (sugar binding)	11.291	11.6487	12.2229	9.70827	11.1458	11.5455	11.8838	11.5406	11.606	10.6437	11.2992	11.8822	10.3655	10.8959	11.3417	7.41851	10.2229	10.8004	11.0307	11.0851	11.1704	10.0584	10.5337	10.4317	10.1631	7.09055	7.81432	9.6333	10.6539	7.02703	7.12657	7.06582	7.9211	8.78881	10.1629	8.16851	10.4526	10.8142	10.9032	11.3012	8.38921	8.3033
Clic1	114584	1416656_at	chloride intracellular channel 1	2	GO:0006810 (transport),GO:0006811 (ion transport),GO:0006821 (chloride transport)	GO:0005624 (membrane fraction),GO:0005625 (soluble fraction),GO:0005634 (nucleus),GO:0005635 (nuclear envelope),GO:0005737 (cytoplasm),GO:0005903 (brush border),GO:0016020 (membrane)	GO:0005216 (ion channel activity),GO:0005244 (voltage-gated ion channel activity),GO:0005247 (voltage-gated chloride channel activity),GO:0005254 (chloride channel activity),GO:0005515 (protein binding),GO:0031404 (chloride ion binding)	11.8674	11.9048	11.79	12.148	11.8866	11.7582	11.5165	11.581	11.5059	11.8445	11.9721	11.7599	12.0373	11.9543	11.7659	12.0557	12.4697	12.3141	11.9684	11.6919	11.7181	12.4123	12.2044	11.8754	11.992	12.5274	12.413	12.4043	12.3602	12.4245	12.4611	12.4466	12.3104	12.3227	12.0099	12.4135	11.7549	11.6308	11.9269	11.652	11.6435	12.1722
Clic4	29876	1423393_at	chloride intracellular channel 4 (mitochondrial)	24	GO:0006810 (transport),GO:0006811 (ion transport),GO:0006821 (chloride transport),GO:0030154 (cell differentiation),GO:0030336 (negative regulation of cell migration)	GO:0005622 (intracellular),GO:0005625 (soluble fraction),GO:0005737 (cytoplasm),GO:0005739 (mitochondrion),GO:0005902 (microvillus),GO:0015629 (actin cytoskeleton),GO:0016020 (membrane),GO:0016021 (integral to membrane)	GO:0005216 (ion channel activity),GO:0005244 (voltage-gated ion channel activity),GO:0005247 (voltage-gated chloride channel activity),GO:0005254 (chloride channel activity),GO:0005515 (protein binding),GO:0031404 (chloride ion binding)	11.8828	12.4841	12.8117	10.2836	11.8201	12.6461	13.286	12.9439	12.7659	12.1224	12.3393	12.5029	11.6905	12.7789	13.3185	10.6739	11.6433	12.1609	12.6705	12.7439	12.6759	11.5541	12.4894	12.6243	12.7031	11.4308	11.326	11.2028	12.0961	11.4618	11.5333	11.5743	11.2595	11.2844	11.4879	11.2595	11.7293	11.8438	11.6271	11.9168	10.9604	11.0929
Clic5	224796	1439505_at	chloride intracellular channel 5	8	GO:0006810 (transport),GO:0006811 (ion transport),GO:0006821 (chloride transport),GO:0007565 (pregnancy)	GO:0005626 (insoluble fraction),GO:0005902 (microvillus),GO:0015629 (actin cytoskeleton),GO:0016020 (membrane)	GO:0005216 (ion channel activity),GO:0005244 (voltage-gated ion channel activity),GO:0005247 (voltage-gated chloride channel activity),GO:0005254 (chloride channel activity),GO:0005515 (protein binding),GO:0031404 (chloride ion binding)	3.59341	3.24884	3.48873	2.96354	3.40126	3.28246	4.56443	4.5089	4.30781	3.25441	3.48274	3.12844	3.38687	3.29149	5.42344	3.27069	2.8929	3.27645	3.56699	4.70928	4.50389	3.01736	3.44979	5.51035	5.72816	2.88257	3.11009	3.04313	3.14127	3.01787	3.04728	3.0236	3.09683	3.10827	3.34188	3.15453	3.30512	3.07979	3.27844	3.12346	3.14513	2.99682
Cln5	211286	1426886_at	ceroid-lipofuscinosis, neuronal 5	15	GO:0007040 (lysosome organization and biogenesis),GO:0007042 (lysosomal lumen acidification),GO:0007420 (brain development),GO:0007601 (visual perception),GO:0022008 (neurogenesis)	GO:0005615 (extracellular space),GO:0005764 (lysosome),GO:0005765 (lysosomal membrane),GO:0005775 (vacuolar lumen),GO:0005783 (endoplasmic reticulum),GO:0005794 (Golgi apparatus),GO:0016021 (integral to membrane),GO:0048471 (perinuclear region of cytoplasm)	GO:0003674 (molecular_function),GO:0005515 (protein binding)	9.51512	9.5445	9.83322	8.95401	9.29444	9.90587	9.60362	9.15216	9.17331	9.05619	9.55748	9.85644	9.16138	9.41714	9.42295	9.06543	8.90582	9.79917	9.79767	9.50482	9.23543	9.21154	9.30847	8.85764	8.24954	8.43213	8.5638	8.77849	9.23248	8.4308	8.51294	8.44662	8.57838	8.35817	8.82631	8.68384	8.96442	9.06507	9.16074	9.43111	8.53856	8.77647
Cln8	26889	1448455_at	ceroid-lipofuscinosis, neuronal 8	14	GO:0001306 (age-dependent response to oxidative stress),GO:0006644 (phospholipid metabolic process),GO:0006672 (ceramide metabolic process),GO:0007006 (mitochondrial membrane organization and biogenesis),GO:0007040 (lysosome organization and biogenesis),GO:0007399 (nervous system development),GO:0007601 (visual perception),GO:0007628 (adult walking behavior),GO:0008203 (cholesterol metabolic proc…	GO:0005783 (endoplasmic reticulum),GO:0005793 (ER-Golgi intermediate compartment),GO:0016020 (membrane),GO:0016021 (integral to membrane)		9.46843	8.96544	8.9275	9.39441	9.52386	8.95543	7.47231	7.89928	8.6153	9.40516	9.1733	8.68211	9.79651	9.4347	7.86126	9.70022	9.0603	8.54118	7.15906	8.3272	9.0572	9.00119	7.8793	8.61439	9.22703	9.14798	9.76555	9.74743	9.34825	9.49128	9.71408	9.49481	9.67682	9.71494	9.23598	9.76811	9.29813	9.30034	9.48226	9.11916	9.46059	10.0645
Clpp	53895	1416615_at	caseinolytic peptidase, ATP-dependent, proteolytic subunit homolog (E. coli)	10	GO:0006508 (proteolysis),GO:0006515 (misfolded or incompletely synthesized protein catabolic process)	GO:0005739 (mitochondrion)	GO:0004252 (serine-type endopeptidase activity),GO:0008233 (peptidase activity),GO:0008462 (endopeptidase Clp activity),GO:0016787 (hydrolase activity)	7.79638	7.764	7.81104	7.91742	7.80933	7.62627	7.28553	7.31841	7.22323	7.67268	7.9234	7.66886	7.78031	7.66499	7.55185	7.98308	8.12941	7.97871	7.7792	7.24459	7.16872	8.01744	7.70561	7.4427	7.32483	8.18461	8.28035	8.10722	8.06409	8.17087	8.17466	8.05414	7.9193	7.91894	7.54724	8.10748	8.22256	7.91003	7.83573	7.78242	7.95333	7.88121
Clspn	269582	1456280_at	claspin homolog (Xenopus laevis)	3	GO:0000076 (DNA replication checkpoint),GO:0006281 (DNA repair),GO:0006974 (response to DNA damage stimulus),GO:0007049 (cell cycle)	GO:0005634 (nucleus),GO:0005694 (chromosome)	GO:0000217 (DNA secondary structure binding),GO:0003677 (DNA binding),GO:0005515 (protein binding)	7.66667	7.19612	5.78982	8.06331	7.71009	6.999	4.47881	4.19177	4.34479	7.61587	7.47866	6.43836	7.59073	7.26268	5.13352	7.88276	8.0331	7.92408	5.22464	4.85681	4.35354	7.7735	6.54328	4.94415	5.64303	8.21615	8.62631	8.76039	8.5129	8.74517	8.60945	8.6527	8.64933	8.56972	8.14091	8.53589	7.93978	7.73118	7.96887	7.47167	7.95289	7.75226
Clta	12757	1434540_a_at	clathrin, light polypeptide (Lca)	18	GO:0006886 (intracellular protein transport)	GO:0005905 (coated pit),GO:0030125 (clathrin vesicle coat)	GO:0005509 (calcium ion binding)	11.5307	11.762	11.5357	11.7857	11.6688	11.5248	11.2681	10.9231	10.9606	11.8887	11.8377	11.6307	11.8959	11.7917	11.5482	11.8236	11.3184	11.2502	11.1251	11.029	11.0213	11.4925	11.1717	10.8679	10.7018	11.425	11.4438	11.3503	11.2387	11.5555	11.3926	11.4955	11.5398	11.3931	11.093	11.4893	10.8625	10.29	11.024	10.658	10.2097	11.7019
Cltb	74325	1460740_at	clathrin, light polypeptide (Lcb)	4	GO:0006886 (intracellular protein transport),GO:0008150 (biological_process)	GO:0005905 (coated pit),GO:0030125 (clathrin vesicle coat)	GO:0005509 (calcium ion binding)	6.72238	6.50188	6.52397	6.50281	6.65616	6.58023	6.27801	5.60058	5.23466	6.6115	6.62289	6.85243	6.64767	6.53746	6.28229	6.71996	6.70849	6.57209	5.58512	5.9475	5.64902	6.16963	6.10621	5.7508	5.67713	6.83512	7.00772	7.02653	6.99183	7.02958	7.05966	6.9599	6.86863	6.86073	6.57447	6.88037	6.85436	6.76765	6.80752	6.66534	6.92697	6.81989
Cmpk	66588	1423073_at	cytidylate kinase	2	GO:0006139 (nucleobase, nucleoside, nucleotide and nucleic acid metabolic process),GO:0006221 (pyrimidine nucleotide biosynthetic process),GO:0009220 (pyrimidine ribonucleotide biosynthetic process)	GO:0005615 (extracellular space),GO:0005634 (nucleus),GO:0005737 (cytoplasm)	GO:0000166 (nucleotide binding),GO:0004127 (cytidylate kinase activity),GO:0004849 (uridine kinase activity),GO:0005524 (ATP binding),GO:0016301 (kinase activity),GO:0016740 (transferase activity),GO:0016776 (phosphotransferase activity, phosphate group as acceptor),GO:0019201 (nucleotide kinase activity)	11.1734	11.0124	10.9266	10.9406	11.1109	11.0585	10.8589	10.8376	10.7758	10.956	10.9028	10.7581	11.1064	10.8827	10.9713	11.2604	10.9843	10.8841	10.6429	10.7462	10.8554	10.845	10.8881	10.8469	10.8295	11.0728	11.1436	11.1428	10.9983	11.1476	11.14	11.1327	11.2139	11.2191	10.7899	11.1541	10.8939	10.8787	11.1609	10.7064	10.7915	11.2124
Cnbp	12785	1416244_a_at	cellular nucleic acid binding protein	4	GO:0006350 (transcription),GO:0006355 (regulation of transcription, DNA-dependent),GO:0006695 (cholesterol biosynthetic process),GO:0008284 (positive regulation of cell proliferation),GO:0045944 (positive regulation of transcription from RNA polymerase II promoter)	GO:0005634 (nucleus),GO:0005783 (endoplasmic reticulum),GO:0005829 (cytosol)	GO:0003676 (nucleic acid binding),GO:0003677 (DNA binding),GO:0003700 (transcription factor activity),GO:0008270 (zinc ion binding),GO:0046872 (metal ion binding)	11.2567	11.0795	11.0025	11.2718	11.2648	11.1003	10.4377	10.2345	10.1491	10.7754	11.0691	10.7952	11.1758	11.0925	10.5802	11.4169	11.6989	11.4571	10.6183	10.4549	10.3085	11.2804	10.9271	10.3776	9.91056	11.767	11.6064	11.5139	11.4608	11.616	11.5884	11.6862	11.6148	11.6185	11.2245	11.4506	11.0252	10.9472	10.6317	10.6558	10.846	11.3034
Cnih	12793	1423727_at	cornichon homolog (Drosophila)	2	GO:0006955 (immune response),GO:0007165 (signal transduction),GO:0007242 (intracellular signaling cascade)	GO:0016020 (membrane),GO:0016021 (integral to membrane)		10.3084	10.2937	10.3101	10.6798	10.3221	10.1353	9.68346	9.78937	9.65822	10.4423	10.4104	10.4023	10.3761	10.2707	10.0029	10.6283	10.6852	10.5455	10.162	9.96674	9.74431	10.5962	10.362	10.1096	9.94909	10.905	10.9758	10.9432	10.7834	11.003	10.9822	10.8299	10.8378	10.8039	10.2908	10.8836	10.7334	10.5853	10.8718	10.5528	10.6243	10.8687
Cnn3	71994	1426724_at	calponin 3, acidic	6	GO:0006939 (smooth muscle contraction),GO:0031032 (actomyosin structure organization and biogenesis)		GO:0003779 (actin binding),GO:0005515 (protein binding),GO:0005516 (calmodulin binding),GO:0005523 (tropomyosin binding),GO:0030172 (troponin C binding)	4.54017	5.19774	5.90418	4.53473	4.69466	5.09327	9.02854	9.09006	8.8749	4.69047	4.858	5.49098	4.70601	4.98997	8.69567	4.55267	4.65594	5.38035	9.22844	10.1367	9.95511	4.81134	7.71617	8.91198	9.03538	4.51362	4.13371	4.41298	4.42345	4.50126	4.62271	4.32015	4.15604	4.26854	4.54915	4.49489	4.85223	4.31314	4.57124	4.52423	4.51307	4.35801
Cnot6l	231464	1451723_at	CCR4-NOT transcription complex, subunit 6-like	16	GO:0006350 (transcription),GO:0006355 (regulation of transcription, DNA-dependent),GO:0008150 (biological_process)	GO:0005575 (cellular_component),GO:0005634 (nucleus)	GO:0000287 (magnesium ion binding),GO:0003674 (molecular_function),GO:0003723 (RNA binding),GO:0004518 (nuclease activity),GO:0004527 (exonuclease activity),GO:0005515 (protein binding),GO:0016787 (hydrolase activity),GO:0046872 (metal ion binding)	6.75633	6.10889	5.16049	6.89798	6.74615	6.32006	5.18398	5.13209	5.35025	6.33891	6.35677	5.18802	6.30529	6.32659	5.57005	6.95167	6.38654	6.15503	5.40241	5.29359	5.1081	6.0409	6.16301	6.09439	5.50105	6.41184	6.67678	6.68388	6.32756	6.2905	6.45804	6.54701	6.58743	6.31224	6.12027	6.85848	6.45146	6.49626	6.95504	6.46125	6.95938	6.79418
Commd10	69456	1428491_at	COMM domain containing 10	2	GO:0008150 (biological_process)	GO:0005575 (cellular_component)	GO:0003674 (molecular_function)	8.42206	8.18737	8.16778	8.5717	8.6056	8.24914	7.90593	7.54151	7.24296	8.24649	8.33211	8.216	8.48255	8.30086	8.01022	8.70706	8.78579	8.54132	7.94226	7.72962	7.62906	8.40363	8.2644	7.95393	7.85564	8.7854	8.84913	8.86155	8.77395	8.57596	8.94066	8.78979	8.78329	8.8041	8.44884	8.83031	8.55555	8.59937	8.80531	8.43722	8.53669	8.83554
Commd4	66199	1417006_at	COMM domain containing 4	7	GO:0008150 (biological_process)	GO:0005575 (cellular_component),GO:0005737 (cytoplasm)	GO:0003674 (molecular_function)	8.92376	8.8613	8.76482	9.02519	8.90473	8.7702	8.4664	8.39982	8.21173	8.64086	8.7226	8.68656	8.79612	8.65607	8.56911	8.90243	8.7746	8.76035	8.69868	8.64859	8.64888	8.81123	8.87768	8.68662	8.80799	8.88155	9.02682	8.98108	8.92389	8.99802	9.00597	9.02876	8.97609	8.90371	8.6419	8.92916	8.87004	8.68918	8.98824	8.79419	8.79054	8.91499
Coq10b	67876	1460510_a_at	coenzyme Q10 homolog B (S. cerevisiae)	26		GO:0005739 (mitochondrion)		8.6509	8.47438	8.43235	7.42169	8.69011	9.10574	7.86754	7.95931	8.25583	8.04597	8.48172	8.06483	8.05301	8.27778	6.84695	7.29275	8.26839	8.53805	7.32546	7.7889	8.09268	7.74974	7.46341	7.46915	7.54602	7.59237	7.42368	7.73577	8.48745	7.40085	7.52508	7.29342	7.21078	7.49122	8.33813	7.28232	8.15054	8.21716	8.39203	8.44067	7.63597	7.39685
Coro1a	12721	1416246_a_at	coronin, actin binding protein 1A	10	GO:0006810 (transport),GO:0006928 (cell motility),GO:0007067 (mitosis)	GO:0005765 (lysosomal membrane),GO:0015629 (actin cytoskeleton)	GO:0003779 (actin binding),GO:0005198 (structural molecule activity)	11.2056	11.1303	11.226	11.2414	11.4255	11.431	10.6843	10.5152	10.6273	11.1571	11.348	11.5078	11.1777	11.118	10.614	11.5874	11.5573	11.4645	10.7378	10.2287	10.1559	11.4742	10.9205	9.96219	9.94217	11.7232	12.2318	12.2006	12.1152	12.2863	12.2774	12.2823	12.0543	12.0159	11.7979	12.153	11.0284	10.6459	10.7688	10.5679	10.5706	11.8069
Cox6a2	12862	1417607_at	cytochrome c oxidase, subunit VI a, polypeptide 2	22	GO:0006118 (electron transport)	GO:0005615 (extracellular space),GO:0005739 (mitochondrion),GO:0005740 (mitochondrial envelope),GO:0016020 (membrane)	GO:0004129 (cytochrome-c oxidase activity),GO:0016491 (oxidoreductase activity)	7.38457	7.14266	7.41212	7.35038	7.06478	6.95024	6.99092	6.92201	6.98883	7.19902	7.14358	7.22515	7.19926	7.13506	6.95938	6.89735	6.33195	6.37682	7.03404	6.49123	6.77813	6.45509	6.64161	6.5662	6.5655	6.3978	6.42507	6.29181	6.48203	6.37138	6.30921	6.29653	6.48588	6.69719	6.77236	6.35462	6.71349	6.6852	6.57142	6.75847	6.76467	6.40587
Cp	12870	1448734_at	ceruloplasmin	17	GO:0006810 (transport),GO:0006811 (ion transport),GO:0006825 (copper ion transport),GO:0006826 (iron ion transport),GO:0006878 (copper ion homeostasis),GO:0006879 (iron ion homeostasis)	GO:0005576 (extracellular region),GO:0005615 (extracellular space)	GO:0004322 (ferroxidase activity),GO:0005375 (copper ion transporter activity),GO:0005506 (iron ion binding),GO:0005507 (copper ion binding),GO:0016491 (oxidoreductase activity),GO:0046872 (metal ion binding)	3.01973	3.84334	7.61575	3.26173	3.02436	3.44271	8.79086	9.13824	9.23073	2.93587	3.77099	6.20887	3.12552	2.85039	6.65748	3.03537	3.285	3.38191	8.06332	8.98427	9.07798	3.1067	5.55929	6.4901	6.24118	3.1712	2.93057	2.64989	2.86905	2.81404	2.84095	2.71191	2.85616	2.78	2.81218	2.78835	3.09827	3.25761	2.90963	2.93866	2.88453	2.92644
Cpd	12874	1442212_at	carboxypeptidase D	11	GO:0005975 (carbohydrate metabolic process),GO:0006508 (proteolysis)	GO:0005615 (extracellular space),GO:0005624 (membrane fraction),GO:0016020 (membrane),GO:0016021 (integral to membrane)	GO:0004180 (carboxypeptidase activity),GO:0004182 (carboxypeptidase A activity),GO:0004187 (carboxypeptidase D activity),GO:0008233 (peptidase activity),GO:0008237 (metallopeptidase activity),GO:0008270 (zinc ion binding),GO:0008472 (metallocarboxypeptidase D activity),GO:0009045 (xylose isomerase activity),GO:0016787 (hydrolase activity),GO:0046872 (metal ion binding)	5.54737	5.37694	6.01098	4.48188	4.97789	4.95004	5.33319	5.44441	5.43163	4.78071	5.31642	5.46256	4.8522	4.55903	4.68804	4.33446	5.72492	5.6708	4.98342	5.53442	5.34811	4.68831	4.77956	4.37946	4.16236	5.36379	4.54398	4.58653	4.82491	4.67212	4.72098	4.86705	4.62129	4.16265	4.53102	4.7791	4.80669	5.59347	5.54681	5.48601	4.86937	4.36559
Crbn	58799	1423094_at	cereblon	8	GO:0006510 (ATP-dependent proteolysis),GO:0008150 (biological_process)	GO:0005575 (cellular_component)	GO:0003674 (molecular_function),GO:0004176 (ATP-dependent peptidase activity)	8.36462	7.9366	8.05014	8.80023	8.32554	8.10032	8.87004	9.96087	10.1662	7.91989	8.0526	8.0489	8.07525	7.89186	8.77878	8.5851	8.19644	8.16783	9.43654	9.93509	10.1592	8.3645	9.59065	9.87709	9.84941	8.33537	8.40051	8.33176	8.10798	8.10319	8.17022	8.21798	8.25305	8.09064	7.7817	8.33994	7.92045	7.918	8.4564	8.21317	7.90872	8.31724
Creb5	231991	1442576_at	CAMP responsive element binding protein 5	24	GO:0006350 (transcription),GO:0006355 (regulation of transcription, DNA-dependent),GO:0006366 (transcription from RNA polymerase II promoter),GO:0045893 (positive regulation of transcription, DNA-dependent)	GO:0005634 (nucleus)	GO:0003677 (DNA binding),GO:0003700 (transcription factor activity),GO:0005515 (protein binding),GO:0043565 (sequence-specific DNA binding),GO:0046983 (protein dimerization activity)	5.33603	5.80892	6.65506	4.97274	6.3415	6.00362	6.43711	6.64077	6.59114	5.85544	5.97857	6.2332	6.0266	6.08396	6.89915	4.97079	5.50199	4.57648	5.68811	5.07981	4.98219	4.70399	5.99084	5.45263	5.44798	4.96666	4.67615	4.7635	4.85565	4.518	4.65222	4.63556	4.64009	4.59162	4.72366	5.01136	4.75877	4.91362	5.83474	4.8949	4.98129	4.8109
Crip1	12925	1416326_at	cysteine-rich protein 1 (intestinal)	7			GO:0008270 (zinc ion binding),GO:0046872 (metal ion binding)	11.1136	11.1032	11.1611	11.0146	11.0042	10.9862	10.8316	11.0556	10.7472	11.3032	11.485	11.4457	11.432	11.421	11.2764	10.9834	12.0517	11.9621	11.8147	11.4105	11.284	12.0302	11.916	11.664	11.6866	12.1025	12.5656	12.5394	12.4711	12.4302	12.4688	12.3844	12.3062	12.2885	12.0011	12.5762	12.2037	11.7343	12.1041	12.0102	11.602	12.5937
Crls1	66586	1429737_a_at	cardiolipin synthase 1	10	GO:0008654 (phospholipid biosynthetic process)	GO:0005739 (mitochondrion),GO:0016020 (membrane),GO:0016021 (integral to membrane)	GO:0016740 (transferase activity),GO:0016780 (phosphotransferase activity, for other substituted phosphate groups)	8.19187	7.81907	8.08323	7.84533	8.10609	7.85983	7.38323	6.94629	7.1545	7.49153	7.9855	7.83949	8.02753	7.82671	7.29068	8.25527	7.69139	7.69822	7.14994	7.2578	7.24557	7.43183	7.53783	7.40588	7.15791	7.87158	8.11579	8.17849	8.01214	8.07092	8.21411	8.23403	8.14479	8.07607	7.59365	8.14846	7.30269	7.53148	7.73687	7.55686	7.49551	8.06139
Crsp2	26896	1437632_at	cofactor required for Sp1 transcriptional activation, subunit 2	4	GO:0045944 (positive regulation of transcription from RNA polymerase II promoter)	GO:0000119 (mediator complex)	GO:0003713 (transcription coactivator activity),GO:0005515 (protein binding)	7.78899	7.30106	7.14389	7.3605	7.30852	7.27433	6.84377	6.44254	6.15479	7.1794	7.32937	7.28299	7.34697	7.305	6.99606	7.43941	7.48907	7.51425	6.71678	6.53529	6.32004	7.30722	7.37821	7.18978	6.83315	7.57439	7.59286	7.48636	7.15855	7.29072	7.51306	7.48271	7.40421	7.01609	7.05168	7.58856	7.10206	7.58242	7.65275	7.1322	7.05377	7.08386
Crtap	56693	1448592_at	cartilage associated protein	10		GO:0005578 (proteinaceous extracellular matrix),GO:0005615 (extracellular space)	GO:0005488 (binding)	8.39657	8.25974	8.06602	8.63782	8.41783	8.10051	7.55098	7.74741	7.34909	8.36496	8.39465	8.39872	8.3062	8.12831	7.99243	8.49307	8.98271	8.80239	8.48197	8.06981	7.76555	8.90786	8.68642	8.33162	8.14224	9.08568	8.70199	8.68611	8.51419	8.85962	8.93479	8.88867	8.55951	8.51447	8.17326	8.56066	8.60731	8.19257	8.65501	8.16899	8.32608	8.50617
Cryl1	68631	1416795_at	crystallin, lambda 1	7	GO:0006631 (fatty acid metabolic process)		GO:0016491 (oxidoreductase activity)	7.96305	7.62333	7.53753	7.82029	7.80148	7.58074	7.19911	7.09293	6.65036	7.37452	7.86867	7.64192	7.69891	7.62014	7.66608	7.83289	7.83844	7.81078	7.76818	7.40165	7.26579	7.93414	7.91913	7.70358	7.49962	7.91917	8.30858	8.25421	8.16964	8.24653	8.32155	8.29576	8.01616	8.08051	7.84974	8.18944	7.67385	7.53803	8.07842	7.71369	7.66439	8.21315
Cse1l	110750	1448809_at	chromosome segregation 1-like (S. cerevisiae)	4	GO:0000059 (protein import into nucleus, docking),GO:0006810 (transport),GO:0006886 (intracellular protein transport),GO:0006915 (apoptosis),GO:0008283 (cell proliferation),GO:0015031 (protein transport)	GO:0005634 (nucleus),GO:0005643 (nuclear pore),GO:0005737 (cytoplasm)	GO:0005488 (binding),GO:0008262 (importin-alpha export receptor activity),GO:0008565 (protein transporter activity)	9.0491	8.86572	8.65953	8.96407	8.94057	8.91944	8.457	7.90824	7.7896	8.74062	8.90172	8.64354	8.82867	8.6972	8.51015	9.03994	9.28186	9.17151	8.56296	8.27947	8.05176	8.9373	8.70298	8.24158	7.86362	9.15492	9.35133	9.36699	9.28187	9.35243	9.25399	9.32083	9.32231	9.29545	9.08653	9.26325	9.17092	9.09551	9.0605	8.78457	9.04449	8.83361
Csf1	12977	1460220_a_at	colony stimulating factor 1 (macrophage)	24	GO:0001954 (positive regulation of cell-matrix adhesion),GO:0008283 (cell proliferation),GO:0008284 (positive regulation of cell proliferation),GO:0009987 (cellular process),GO:0030097 (hemopoiesis),GO:0030154 (cell differentiation),GO:0030225 (macrophage differentiation),GO:0030278 (regulation of ossification),GO:0030335 (positive regulation of cell migration),GO:0040018 (positive regulation of …	GO:0005615 (extracellular space),GO:0016020 (membrane),GO:0016021 (integral to membrane)	GO:0005125 (cytokine activity),GO:0005157 (macrophage colony stimulating factor receptor binding),GO:0005515 (protein binding),GO:0008083 (growth factor activity)	10.7209	10.7809	10.1514	7.8248	9.77071	11.1191	10.7422	9.45181	8.73236	9.77337	10.0844	10.235	8.27838	9.83973	10.1373	7.44263	7.39492	9.9834	10.1242	9.42964	8.81102	8.59412	9.60684	9.7252	9.07222	6.02283	6.2241	6.49416	8.06273	5.9285	6.10632	5.70831	6.07263	6.0825	6.955	6.12726	7.56202	8.49142	8.2068	9.60098	6.42787	6.52054
Csf1r	12978	1419872_at	colony stimulating factor 1 receptor	4	GO:0000074 (regulation of progression through cell cycle),GO:0006468 (protein amino acid phosphorylation),GO:0007165 (signal transduction),GO:0007169 (transmembrane receptor protein tyrosine kinase signaling pathway),GO:0007275 (multicellular organismal development),GO:0008283 (cell proliferation),GO:0009987 (cellular process),GO:0019735 (antimicrobial humoral response (sensu Vertebrata)),GO:0050…	GO:0005615 (extracellular space),GO:0005622 (intracellular),GO:0005886 (plasma membrane),GO:0005887 (integral to plasma membrane),GO:0016020 (membrane),GO:0016021 (integral to membrane)	GO:0000166 (nucleotide binding),GO:0004672 (protein kinase activity),GO:0004674 (protein serine/threonine kinase activity),GO:0004713 (protein-tyrosine kinase activity),GO:0004714 (transmembrane receptor protein tyrosine kinase activity),GO:0004872 (receptor activity),GO:0005011 (macrophage colony stimulating factor receptor activity),GO:0005515 (protein binding),GO:0005524 (ATP binding),GO:00163…	13.1823	13.0849	13.0639	13.1495	13.1439	13.1016	12.7953	12.7398	12.298	13.1393	13.1118	13.0826	13.0811	13.1234	12.8457	13.2323	13.4491	13.3022	12.997	12.6626	12.4838	13.3322	13.0915	12.9968	12.916	13.4498	13.2316	13.2001	13.1531	13.3582	13.2868	13.2547	13.359	13.3591	13.1281	13.2858	13.1668	13.106	13.1828	13.1261	13.0318	13.3616
Csf2	12981	1427429_at	colony stimulating factor 2 (granulocyte-macrophage)	26	GO:0006955 (immune response),GO:0006968 (cellular defense response),GO:0007166 (cell surface receptor linked signal transduction),GO:0007275 (multicellular organismal development),GO:0008284 (positive regulation of cell proliferation),GO:0042127 (regulation of cell proliferation),GO:0043011 (myeloid dendritic cell differentiation),GO:0045885 (positive regulation of survival gene product activity)	GO:0005576 (extracellular region),GO:0005615 (extracellular space)	GO:0005125 (cytokine activity),GO:0005129 (granulocyte macrophage colony-stimulating factor receptor binding),GO:0008083 (growth factor activity)	9.80927	9.1452	9.47187	4.8165	8.92413	8.18708	6.30774	4.88346	5.08895	6.72381	7.95109	7.82339	6.65325	5.35019	5.07174	4.34784	7.06976	6.77415	4.95491	4.77223	4.96001	4.8895	4.6775	4.36099	4.49854	4.41031	4.62033	4.69498	5.51766	4.68406	4.58879	4.27566	4.79612	4.88199	5.79515	4.54605	5.32268	5.07207	6.18538	6.66489	4.88009	4.64153
Csf3	12985	1419427_at	colony stimulating factor 3 (granulocyte)	12	GO:0006955 (immune response),GO:0006968 (cellular defense response),GO:0007267 (cell-cell signaling),GO:0007275 (multicellular organismal development),GO:0008284 (positive regulation of cell proliferation),GO:0019221 (cytokine and chemokine mediated signaling pathway),GO:0030851 (granulocyte differentiation)	GO:0005576 (extracellular region),GO:0005615 (extracellular space)	GO:0005125 (cytokine activity),GO:0005130 (granulocyte colony-stimulating factor receptor binding),GO:0005138 (interleukin-6 receptor binding),GO:0008083 (growth factor activity),GO:0019899 (enzyme binding)	4.29619	3.772	4.95222	3.9097	4.2853	4.47438	4.62528	5.65519	6.1851	4.1108	3.68349	5.10183	4.12103	4.00387	4.24869	3.95604	3.89864	3.85863	4.10214	4.19045	4.75169	3.85792	3.9823	4.04647	4.17812	3.67884	4.06286	4.0226	4.15853	4.20401	4.14232	3.97325	4.21682	4.0997	4.24804	4.06979	4.02237	4.21571	4.03179	4.44008	4.5465	4.29969
Csf3r	12986	1418806_at	colony stimulating factor 3 receptor (granulocyte)	17	GO:0007155 (cell adhesion),GO:0030593 (neutrophil chemotaxis)	GO:0005615 (extracellular space),GO:0016020 (membrane),GO:0016021 (integral to membrane)	GO:0004872 (receptor activity),GO:0004896 (hematopoietin/interferon-class (D200-domain) cytokine receptor activity),GO:0005515 (protein binding)	7.86322	8.01066	9.48063	7.71016	7.77287	7.8106	9.08716	10.2643	10.4652	7.63252	8.08587	8.93034	7.03449	6.98195	7.73923	7.65367	6.59666	6.7112	8.63394	9.97457	10.1927	7.24746	7.75791	8.09012	9.13008	6.69366	6.67439	6.71308	6.67797	6.76985	6.5743	6.29055	6.60161	6.73539	6.17257	6.83786	7.20155	6.89346	6.93361	7.01458	6.67685	7.10674
Csnk2a1	12995	1419034_at	casein kinase 2, alpha 1 polypeptide	11	GO:0006468 (protein amino acid phosphorylation),GO:0016055 (Wnt receptor signaling pathway)	GO:0005956 (protein kinase CK2 complex)	GO:0000166 (nucleotide binding),GO:0004672 (protein kinase activity),GO:0004674 (protein serine/threonine kinase activity),GO:0005515 (protein binding),GO:0005524 (ATP binding),GO:0008013 (beta-catenin binding),GO:0016301 (kinase activity),GO:0016740 (transferase activity),GO:0019888 (protein phosphatase regulator activity)	5.89097	5.89454	6.29802	5.42697	5.71541	5.74083	6.03895	5.97566	5.9432	5.64133	6.05588	6.54661	5.73433	5.86803	5.87972	5.66142	6.06661	5.96576	6.17839	6.02586	6.03343	5.81732	6.10078	6.10918	5.76378	6.01945	5.91728	5.71595	5.35554	5.88871	5.98782	5.87651	5.92077	5.666	5.52925	5.65075	6.24141	6.68828	5.61554	6.07438	6.27055	6.00128
Cspg2	13003	1427256_at	chondroitin sulfate proteoglycan 2	6	GO:0007155 (cell adhesion),GO:0007275 (multicellular organismal development),GO:0008037 (cell recognition)	GO:0005578 (proteinaceous extracellular matrix)	GO:0005509 (calcium ion binding),GO:0005529 (sugar binding),GO:0005540 (hyaluronic acid binding)	3.20948	3.12421	4.35384	3.44313	3.2641	3.53877	8.75617	9.34406	8.93949	3.36887	3.46509	3.88506	3.05072	3.17159	8.49116	3.10043	3.2712	3.57755	8.66867	9.64908	9.11163	3.12836	7.56044	8.62392	8.05067	3.26495	3.75639	3.50453	3.57161	3.07783	3.24064	3.33363	3.27073	3.12302	3.25907	3.50977	3.34922	3.22645	3.32303	3.43299	3.63564	3.49314
Csrp1	13007	1425811_a_at	cysteine and glycine-rich protein 1	29	GO:0030036 (actin cytoskeleton organization and biogenesis)	GO:0005634 (nucleus),GO:0015629 (actin cytoskeleton)	GO:0005515 (protein binding),GO:0008270 (zinc ion binding),GO:0046872 (metal ion binding)	9.45931	9.23802	9.35984	9.49973	9.58817	9.48651	10.0387	10.2458	10.2849	9.39968	9.60318	9.42313	9.08074	9.06192	9.70868	9.66286	8.77121	9.09069	10.023	10.3289	10.5311	9.23618	10.0606	10.5109	10.818	8.96601	9.88669	9.95953	9.8988	9.84165	9.94828	9.99139	9.6289	9.53289	9.30538	9.90176	9.42049	9.27868	9.20553	9.34578	9.08741	9.88288
Cst7	13011	1419202_at	cystatin F (leukocystatin)	6	GO:0006955 (immune response)	GO:0005615 (extracellular space)	GO:0004866 (endopeptidase inhibitor activity),GO:0004869 (cysteine protease inhibitor activity)	7.66929	7.55626	7.95764	6.84558	7.18656	7.57236	9.08362	9.79903	10.1801	7.38007	7.73234	7.67614	7.26434	7.47969	9.12969	7.03079	5.37976	6.61684	9.59951	10.2301	10.6422	6.375	9.25935	10.2339	10.475	5.16762	5.75087	5.97707	6.11303	5.45485	5.39644	5.48289	5.50368	5.38363	5.38609	6.00371	5.97782	5.82046	6.04077	6.12009	5.90885	6.11372
Ctnna1	12385	1448149_at	catenin (cadherin associated protein), alpha 1	20	GO:0007155 (cell adhesion),GO:0007163 (establishment and/or maintenance of cell polarity),GO:0007406 (negative regulation of neuroblast proliferation),GO:0043066 (negative regulation of apoptosis),GO:0043297 (apical junction assembly),GO:0045880 (positive regulation of smoothened signaling pathway)	GO:0005856 (cytoskeleton),GO:0005912 (adherens junction),GO:0005915 (zonula adherens),GO:0015629 (actin cytoskeleton),GO:0030027 (lamellipodium)	GO:0005198 (structural molecule activity),GO:0005515 (protein binding),GO:0045296 (cadherin binding),GO:0051015 (actin filament binding)	10.3708	10.5755	10.6874	10.5055	10.3516	10.3347	10.4582	10.4249	10.398	10.5067	10.6142	10.7104	10.5074	10.5426	10.5671	10.4258	10.6944	10.6845	10.5659	10.464	10.3215	10.5562	10.5872	10.4618	10.2518	10.7155	10.5601	10.6339	10.4924	10.5321	10.552	10.6781	10.5855	10.6025	10.2216	10.6061	10.3834	9.78525	10.3944	10.1368	9.68661	10.547
Ctsb	13030	1417492_at	cathepsin B	18	GO:0006508 (proteolysis),GO:0006979 (response to oxidative stress),GO:0042981 (regulation of apoptosis),GO:0050790 (regulation of catalytic activity)	GO:0005622 (intracellular),GO:0005739 (mitochondrion),GO:0005764 (lysosome)	GO:0004197 (cysteine-type endopeptidase activity),GO:0004213 (cathepsin B activity),GO:0004601 (peroxidase activity),GO:0005515 (protein binding),GO:0008233 (peptidase activity),GO:0008234 (cysteine-type peptidase activity),GO:0016787 (hydrolase activity)	12.2548	12.1605	12.0816	12.5157	12.4654	12.2729	11.814	11.8314	11.8391	12.3394	12.2881	12.0589	12.4713	12.3536	12.0924	12.5953	12.1241	12.0378	11.9189	11.8008	11.7998	12.318	12.1205	11.9362	12.1208	12.2272	12.0604	12.054	11.9483	12.0229	12.0887	12.007	12.0452	12.1194	11.7853	12.1166	12.3248	11.9436	12.4055	12.2535	11.9541	12.4895
Ctsc	13032	1446834_at	Cathepsin C	15	GO:0006508 (proteolysis),GO:0006955 (immune response)	GO:0005615 (extracellular space),GO:0005764 (lysosome)	GO:0004197 (cysteine-type endopeptidase activity),GO:0004214 (dipeptidyl-peptidase I activity),GO:0008233 (peptidase activity),GO:0008234 (cysteine-type peptidase activity),GO:0016787 (hydrolase activity),GO:0031404 (chloride ion binding)	7.78096	8.47402	7.99737	6.5689	7.84611	9.05271	8.78831	8.88261	8.32999	7.04338	7.67012	7.87913	5.53923	6.65793	7.70254	5.85559	6.4197	7.84307	8.26463	8.63067	7.73447	6.33584	7.66812	7.91697	6.47506	5.3353	4.85384	5.26882	5.99945	4.97016	5.28023	5.32865	5.42537	5.12906	5.93024	5.08427	5.20063	5.7254	5.92081	6.06152	4.68306	4.49708
Cttn	13043	1423917_a_at	cortactin	6		GO:0001726 (ruffle),GO:0005737 (cytoplasm),GO:0005856 (cytoskeleton),GO:0005938 (cell cortex),GO:0030027 (lamellipodium)	GO:0005515 (protein binding)	6.12008	6.02273	6.20247	6.315	6.09229	6.07413	6.30693	7.61168	7.95858	6.29126	6.03182	6.43222	5.88286	6.1733	6.43426	6.02239	6.33503	6.60184	7.13629	7.45181	8.00949	6.68727	6.77107	7.4662	7.98878	6.23152	5.88	5.97986	5.982	5.91476	5.84501	5.99816	5.95641	5.7115	5.69195	5.78466	5.52199	6.01456	5.89846	6.05201	5.49128	6.01405
Cugbp2	14007	1451154_a_at	CUG triplet repeat, RNA binding protein 2	18	GO:0006376 (mRNA splice site selection)	GO:0005625 (soluble fraction),GO:0005634 (nucleus)	GO:0000166 (nucleotide binding),GO:0003676 (nucleic acid binding),GO:0003723 (RNA binding)	10.3915	10.0827	9.70577	10.0275	10.3005	10.3117	9.85661	9.36898	9.46066	10.112	10.0337	9.82185	10.0752	9.89311	10.0169	10.5845	10.0509	9.96268	9.48246	9.6154	9.64465	9.95937	9.95085	10.2101	10.3397	10.0478	10.3858	10.4184	10.2071	10.4241	10.2881	10.5324	10.5129	10.261	10.1977	10.4108	10.0395	10.1134	10.113	9.72367	10.2716	10.2806
Cxcl1	14825	1419209_at	chemokine (C-X-C motif) ligand 1	28	GO:0000074 (regulation of progression through cell cycle),GO:0006954 (inflammatory response),GO:0006955 (immune response),GO:0009987 (cellular process),GO:0050875 ()	GO:0005576 (extracellular region),GO:0005615 (extracellular space),GO:0005622 (intracellular)	GO:0005125 (cytokine activity),GO:0008009 (chemokine activity),GO:0008083 (growth factor activity)	12.9821	12.7918	12.8869	10.8705	13.1993	13.0667	12.1044	9.40613	8.95964	11.7946	12.3383	12.6961	12.3152	9.77608	8.10295	3.99868	12.0005	11.5813	8.61659	7.28167	7.17293	9.27435	4.48853	3.84307	4.53077	4.94814	4.13457	11.21	10.8136	3.89312	3.714	3.93418	4.03853	8.60684	10.9746	4.2513	9.36016	8.63532	10.7064	10.2997	3.77614	4.4136
Cxcl10	15945	1418930_at	chemokine (C-X-C motif) ligand 10	25	GO:0006118 (electron transport),GO:0006928 (cell motility),GO:0006935 (chemotaxis),GO:0006954 (inflammatory response),GO:0006955 (immune response),GO:0007166 (cell surface receptor linked signal transduction),GO:0007267 (cell-cell signaling),GO:0007517 (muscle development),GO:0008015 (circulation),GO:0008284 (positive regulation of cell proliferation)	GO:0005576 (extracellular region),GO:0005615 (extracellular space),GO:0005625 (soluble fraction)	GO:0005125 (cytokine activity),GO:0008009 (chemokine activity),GO:0008603 (cAMP-dependent protein kinase regulator activity),GO:0009055 (electron carrier activity)	10.2175	10.16	10.7302	7.32261	12.548	13.5559	13.9043	13.7751	13.6015	9.301	9.7852	10.2124	12.5064	13.6197	13.8816	5.97796	10.9596	13.262	13.9323	13.8294	13.7271	12.9542	13.916	13.7867	13.6356	8.73782	6.85636	10.3492	12.7451	6.2648	5.35009	6.04295	6.53169	8.09324	12.5222	7.09876	7.13667	7.68728	7.62617	8.18439	4.96093	6.77068
Cxcl11	56066	1419697_at	chemokine (C-X-C motif) ligand 11	6	GO:0006935 (chemotaxis),GO:0006954 (inflammatory response),GO:0006955 (immune response),GO:0007165 (signal transduction),GO:0007267 (cell-cell signaling)	GO:0005576 (extracellular region),GO:0005615 (extracellular space)	GO:0005125 (cytokine activity),GO:0008009 (chemokine activity)	4.37967	4.62179	4.4116	4.46704	5.23491	7.56005	10.1966	11.7594	11.7679	4.4015	4.11862	4.6918	5.81137	7.42566	10.8662	3.96297	5.23734	9.56639	11.7042	11.6056	11.7781	8.19913	11.5593	11.8708	11.7288	4.48781	4.194	4.19889	5.01848	4.37939	3.75482	4.06537	3.98894	4.51551	5.47103	4.30485	3.87351	4.29726	4.42478	4.25964	4.30651	4.28523
Cxcl2	20310	1449984_at	chemokine (C-X-C motif) ligand 2	28	GO:0006935 (chemotaxis),GO:0006954 (inflammatory response),GO:0006955 (immune response),GO:0007165 (signal transduction)	GO:0005576 (extracellular region),GO:0005615 (extracellular space)	GO:0005125 (cytokine activity),GO:0008009 (chemokine activity)	13.2914	12.8258	13.0972	12.5508	13.5025	13.3016	12.7111	11.3721	11.4622	12.3784	12.6632	12.9327	13.06	11.661	11.0562	7.44239	13.0771	12.3301	10.275	10.3036	10.5751	11.4751	9.01099	7.57497	7.5978	8.34101	8.27478	12.9862	12.711	8.16325	7.79215	8.10083	8.78621	12.1331	13.0143	8.96536	12.6947	12.1786	12.9732	12.1122	7.20891	8.74939
Cxcl9	17329	1418652_at	chemokine (C-X-C motif) ligand 9	6	GO:0006954 (inflammatory response),GO:0006955 (immune response)	GO:0005576 (extracellular region),GO:0005615 (extracellular space)	GO:0005125 (cytokine activity),GO:0008009 (chemokine activity)	4.03596	4.14506	5.18771	4.08889	4.15567	6.92889	12.1297	12.5496	12.2693	3.97472	4.03868	4.89468	4.53158	8.45506	12.8553	4.03349	4.54955	7.56354	12.224	12.2304	12.4239	7.69496	12.6679	12.7036	12.6135	4.08022	3.84155	4.26004	4.26741	4.32432	4.51911	4.24505	4.43453	4.37298	4.3259	4.0201	4.18679	4.03714	4.17939	4.22157	4.57117	4.17548
Cxcr3	12766	1449925_at	chemokine (C-X-C motif) receptor 3	7	GO:0006935 (chemotaxis),GO:0006952 (defense response),GO:0007165 (signal transduction),GO:0007186 (G-protein coupled receptor protein signaling pathway)	GO:0016020 (membrane),GO:0016021 (integral to membrane)	GO:0001584 (rhodopsin-like receptor activity),GO:0004871 (signal transducer activity),GO:0004872 (receptor activity),GO:0004930 (G-protein coupled receptor activity),GO:0004950 (chemokine receptor activity),GO:0016493 (C-C chemokine receptor activity),GO:0016494 (C-X-C chemokine receptor activity),GO:0045028 (purinergic nucleotide receptor activity, G-protein coupled)	6.18854	6.06357	5.65591	6.73037	6.49139	6.21391	5.38043	5.36297	5.32998	6.11283	5.67588	5.36577	5.9769	5.82282	5.29494	6.43543	6.96835	6.84281	6.26543	5.29735	5.21845	7.00487	6.11822	5.65606	5.41785	6.94953	7.54009	7.32848	7.12925	7.08387	7.22522	7.20285	7.37307	7.26516	6.97618	7.44208	7.269	7.30143	7.08818	6.9768	7.28993	6.9554
Cxcr4	12767	1448710_at	chemokine (C-X-C motif) receptor 4	14	GO:0001569 (patterning of blood vessels),GO:0001667 (ameboidal cell migration),GO:0001764 (neuron migration),GO:0006935 (chemotaxis),GO:0006952 (defense response),GO:0007165 (signal transduction),GO:0007186 (G-protein coupled receptor protein signaling pathway),GO:0007281 (germ cell development),GO:0007399 (nervous system development),GO:0007420 (brain development),GO:0008045 (motor axon guidance…	GO:0016020 (membrane),GO:0016021 (integral to membrane),GO:0030426 (growth cone),GO:0031252 (leading edge)	GO:0001584 (rhodopsin-like receptor activity),GO:0003779 (actin binding),GO:0004871 (signal transducer activity),GO:0004872 (receptor activity),GO:0004930 (G-protein coupled receptor activity),GO:0004950 (chemokine receptor activity),GO:0005515 (protein binding),GO:0016493 (C-C chemokine receptor activity),GO:0016494 (C-X-C chemokine receptor activity),GO:0032027 (myosin light chain binding),GO:0…	9.17801	7.42075	5.10603	7.83279	9.08759	8.15318	4.67675	3.79919	5.12693	8.63953	7.7914	6.05378	9.08609	8.45532	6.19401	9.14969	6.58115	5.62938	3.76707	3.63391	4.27655	7.17161	5.04678	4.51142	4.68807	7.10208	8.10777	7.71699	7.22727	7.27963	7.74416	7.77576	7.83231	7.689	7.08466	7.91119	7.51321	7.06761	8.35904	6.70461	7.64345	8.68142
Cyb5b	66427	1417766_at	cytochrome b5 type B	4	GO:0006118 (electron transport),GO:0006810 (transport)	GO:0005739 (mitochondrion),GO:0005743 (mitochondrial inner membrane),GO:0016020 (membrane),GO:0016021 (integral to membrane),GO:0019867 (outer membrane)	GO:0005215 (transporter activity),GO:0005506 (iron ion binding),GO:0020037 (heme binding),GO:0046872 (metal ion binding),GO:0046914 (transition metal ion binding)	9.31186	9.09263	9.26744	9.42655	9.08568	8.87378	8.34461	7.91215	7.75755	9.21658	9.16536	9.36272	9.43554	9.17092	8.843	9.34818	9.21723	9.02327	8.63431	8.40526	8.28081	9.05016	8.81016	8.60964	8.43961	9.38071	9.31834	9.48538	9.28629	9.18966	9.41291	9.46973	9.48613	9.49473	9.07362	9.52494	9.46968	9.24612	9.41572	9.03694	9.43063	9.49204
Cyb5r1	72017	1424048_a_at	cytochrome b5 reductase 1	5	GO:0006118 (electron transport)		GO:0004128 (cytochrome-b5 reductase activity),GO:0016491 (oxidoreductase activity),GO:0050660 (FAD binding),GO:0051287 (NAD binding)	9.46509	9.08488	9.24327	9.76713	9.34065	8.97975	8.28683	8.5632	8.37137	9.07756	9.26867	9.42859	9.45606	9.19952	9.11261	9.60159	9.31361	9.22897	8.87026	8.67892	8.42983	9.51469	9.20544	8.89175	8.78875	9.51223	9.52945	9.36261	9.32538	9.58463	9.63731	9.71795	9.44012	9.33503	8.95223	9.35434	9.26389	9.13724	9.19253	9.08736	9.26	9.29631
Cyb5r4	266690	1426307_at	cytochrome b5 reductase 4	12	GO:0006118 (electron transport),GO:0042168 (heme metabolic process)	GO:0005737 (cytoplasm)	GO:0004128 (cytochrome-b5 reductase activity),GO:0016491 (oxidoreductase activity),GO:0020037 (heme binding),GO:0046914 (transition metal ion binding),GO:0050660 (FAD binding),GO:0051287 (NAD binding)	9.45389	9.41202	9.5709	9.518	9.3521	9.30325	9.27788	9.56772	9.5619	9.33964	9.3384	9.42016	9.55565	9.44512	9.4102	9.59346	9.67894	9.59269	9.65455	9.53415	9.58678	9.78893	9.73833	9.62059	9.74386	9.7569	9.5992	9.64923	9.36264	9.44529	9.66095	9.65732	9.64143	9.6043	9.33287	9.60615	9.39657	9.4049	9.73077	9.45267	9.42721	9.67615
Cybb	13058	1436778_at	cytochrome b-245, beta polypeptide	13	GO:0006118 (electron transport),GO:0006810 (transport),GO:0006811 (ion transport),GO:0006954 (inflammatory response),GO:0019735 (antimicrobial humoral response (sensu Vertebrata))	GO:0005737 (cytoplasm),GO:0005739 (mitochondrion),GO:0005886 (plasma membrane),GO:0005887 (integral to plasma membrane),GO:0016020 (membrane),GO:0016021 (integral to membrane)	GO:0005216 (ion channel activity),GO:0005244 (voltage-gated ion channel activity),GO:0005506 (iron ion binding),GO:0016491 (oxidoreductase activity),GO:0046872 (metal ion binding),GO:0050660 (FAD binding)	12.1789	12.0989	12.5686	11.4439	11.7598	12.1616	12.491	12.5688	12.5726	11.6279	11.7247	12.1209	11.5208	11.7992	12.3168	11.2109	12.0439	12.4852	12.8973	12.9825	13.026	12.5233	12.8063	12.9316	12.8918	11.7143	10.5157	10.6707	11.3274	10.9442	10.9882	10.7608	11.2556	11.2716	11.57	10.7567	10.7296	10.7177	11.4941	11.637	9.99363	11.0059
Cyld	74256	1429618_at	cylindromatosis (turban tumor syndrome)	8	GO:0006412 (translation),GO:0006511 (ubiquitin-dependent protein catabolic process),GO:0006512 (ubiquitin cycle)	GO:0005622 (intracellular),GO:0005840 (ribosome),GO:0005856 (cytoskeleton)	GO:0003735 (structural constituent of ribosome),GO:0004197 (cysteine-type endopeptidase activity),GO:0004221 (ubiquitin thiolesterase activity),GO:0005515 (protein binding),GO:0008233 (peptidase activity),GO:0008234 (cysteine-type peptidase activity),GO:0016787 (hydrolase activity)	8.41577	8.44174	8.5929	8.24153	8.10826	8.23777	8.39038	8.39008	8.47276	8.14206	8.28484	8.39255	8.32053	8.23826	8.45256	8.16911	8.18101	8.313	8.45348	8.82808	8.73063	8.20424	8.60184	9.04117	9.15665	8.09682	8.07587	8.10257	8.05022	7.91699	8.23575	8.21759	8.1257	7.95869	7.82735	8.186	8.16139	8.18546	8.49054	8.08365	8.27634	8.09566
Cyp20a1	77951	1435616_at	cytochrome P450, family 20, subfamily A, polypeptide 1	4	GO:0006118 (electron transport)	GO:0016020 (membrane)	GO:0004497 (monooxygenase activity),GO:0005506 (iron ion binding),GO:0016491 (oxidoreductase activity),GO:0020037 (heme binding),GO:0046872 (metal ion binding)	9.06704	9.10868	9.10035	9.04277	8.96032	8.92597	8.61867	8.25501	7.95616	8.61803	8.87743	9.11284	9.04996	8.84238	8.98572	9.32335	9.15907	9.17618	8.70978	8.49946	8.36961	9.0773	9.07503	8.66909	8.19479	9.22082	9.30998	9.50096	8.92791	9.14981	9.10064	9.41445	9.44137	9.14086	9.0007	9.20496	8.74716	9.13969	9.34056	9.11898	9.13926	9.21181
Cyp51	13121	1450646_at	cytochrome P450, family 51	20	GO:0006118 (electron transport),GO:0006508 (proteolysis),GO:0006694 (steroid biosynthetic process),GO:0006695 (cholesterol biosynthetic process),GO:0008610 (lipid biosynthetic process),GO:0016126 (sterol biosynthetic process)	GO:0005615 (extracellular space),GO:0016020 (membrane),GO:0016021 (integral to membrane)	GO:0004295 (trypsin activity),GO:0004497 (monooxygenase activity),GO:0005506 (iron ion binding),GO:0008168 (methyltransferase activity),GO:0008398 (sterol 14-demethylase activity),GO:0016491 (oxidoreductase activity),GO:0020037 (heme binding),GO:0046872 (metal ion binding)	8.51679	8.35942	8.43234	8.46787	8.51551	8.57989	8.26796	6.00622	5.5063	8.11547	8.38622	8.3852	8.63168	8.74308	8.52595	8.39382	8.63889	8.54084	8.15058	8.44807	7.98333	8.40199	8.37716	8.37586	7.96534	8.81988	8.39238	8.43299	8.40684	7.90423	8.12189	8.17289	8.37843	8.29194	8.02155	8.79323	9.61316	9.38601	9.62824	9.24472	9.17881	9.02059
D030029J20Rik	99324	1437885_at	RIKEN cDNA D030029J20 gene	5				7.46415	7.01236	7.36333	6.94144	7.0596	6.7534	6.09427	4.6083	4.57721	7.0555	7.06695	7.07449	7.04868	6.87335	6.47258	7.30311	6.29235	6.5044	6.06213	4.92128	4.37239	6.82487	6.35822	5.02926	4.82757	6.82339	6.94407	7.06241	6.82519	6.92475	6.66084	6.82517	7.16047	6.78983	6.7835	7.16762	6.59537	7.069	7.31867	6.62352	6.97971	6.9927
D10Ertd438e	52014	1460563_at	DNA segment, Chr 10, ERATO Doi 438, expressed	12	GO:0001525 (angiogenesis),GO:0007275 (multicellular organismal development),GO:0008152 (metabolic process),GO:0030154 (cell differentiation)	GO:0016020 (membrane),GO:0016021 (integral to membrane)	GO:0004872 (receptor activity),GO:0016740 (transferase activity)	9.53902	9.59487	9.84197	9.67473	9.40837	9.48903	9.63025	9.5592	9.41181	9.34211	9.57179	9.58414	9.51386	9.551	9.36036	9.57599	9.8991	9.90956	9.57848	9.55988	9.42486	9.67709	9.52793	9.34445	9.1469	9.89343	9.50703	9.40619	9.25896	9.49746	9.49981	9.50701	9.39953	9.41915	9.14229	9.45821	9.25609	9.41559	9.65636	9.51986	9.289	9.55435
D10Jhu81e	28295	1449000_at	DNA segment, Chr 10, Johns Hopkins University 81 expressed	4		GO:0005615 (extracellular space),GO:0005739 (mitochondrion)		8.4372	8.2608	8.47308	8.70764	8.42672	8.3484	7.98198	8.25314	8.07131	8.4246	8.45608	8.47055	8.45634	8.41226	8.13279	8.52075	8.64884	8.68454	8.61168	8.31924	8.28614	8.65739	8.51266	8.56568	8.21304	8.71703	8.62878	8.62994	8.51083	8.73639	8.66551	8.74475	8.6125	8.59009	8.32712	8.68102	8.29065	8.1025	8.385	8.32061	8.07171	8.77322
D11Ertd497e	52626	1452200_at	DNA segment, Chr 11, ERATO Doi 497, expressed	10				8.45835	8.31832	7.9782	9.0509	8.60823	8.05466	7.04315	6.88169	6.96127	8.43953	8.3708	8.21354	8.69823	8.38527	7.23492	8.83478	8.40461	8.0668	6.81837	6.57196	6.75379	8.3503	7.49828	6.7019	6.79037	8.64807	8.94464	8.86425	8.65581	8.8504	8.8949	9.04333	8.8967	8.94237	8.51055	8.81682	8.48261	8.02114	8.60156	8.30483	8.28356	8.60648
D12Ertd551e	52635	1428408_a_at	DNA segment, Chr 12, ERATO Doi 551, expressed	5		GO:0016020 (membrane),GO:0016021 (integral to membrane)		7.22	7.18416	7.04967	6.98302	7.06858	7.06788	6.86532	6.81796	7.00653	6.88671	7.10815	6.79085	7.01141	6.78544	6.96639	7.21603	7.25637	7.25121	6.83182	6.76413	6.73653	7.24544	7.17254	6.9326	6.3068	7.18926	7.23274	7.37736	7.17051	7.30178	7.38356	7.15791	7.52045	7.34123	7.12797	7.41944	7.01784	7.53077	7.74416	7.24081	7.37424	7.23799
D13Ertd787e	52680	1457304_at	DNA segment, Chr 13, ERATO Doi 787, expressed	24				5.45204	4.8304	4.18801	3.82722	5.54015	5.45572	5.75616	5.89276	5.83795	5.03057	4.8505	4.26358	4.79781	4.99969	6.38338	3.7897	6.24142	5.78989	4.34184	4.81564	4.97487	5.64787	5.94119	5.16293	5.58932	4.77146	3.21676	3.46518	4.84861	3.27686	3.30465	3.77004	3.22257	3.22607	4.85499	3.20282	3.80253	3.99392	4.18757	4.09228	3.45284	3.56054
D14Ertd500e	219072	1451103_at	DNA segment, Chr 14, ERATO Doi 500, expressed	3				8.05798	7.49643	6.61236	7.91728	7.94203	7.48983	5.95183	6.10899	6.00243	7.60176	7.74571	6.8725	7.70821	7.49982	6.55962	8.25029	7.8356	7.69528	6.77472	6.05549	6.15243	7.90181	7.30449	6.29389	6.47283	8.05448	8.53993	8.65635	8.18994	8.7262	8.84806	8.94147	8.60127	8.59037	8.37096	8.36764	8.1278	8.08161	8.33048	7.74231	8.37391	8.05353
D14Ertd668e	219132	1438868_at	DNA segment, Chr 14, ERATO Doi 668, expressed	6	GO:0006355 (regulation of transcription, DNA-dependent)		GO:0005515 (protein binding),GO:0008270 (zinc ion binding)	9.14898	8.73909	9.36879	8.95131	8.53912	9.36594	11.4926	12.2906	12.3287	8.85773	8.72197	9.05729	8.63771	9.24012	11.5231	8.79661	8.70633	9.4756	11.671	12.0159	12.13	9.77612	11.5502	12.0411	12.0773	8.78917	8.40405	8.44957	8.27935	8.36887	8.27959	8.38329	8.22669	8.02845	7.84035	8.29172	5.54085	5.59472	6.36283	6.14911	5.75061	8.00643
D15Wsu126e	28112	1446972_at	DNA segment, Chr 15, Wayne State University 126, expressed	15				6.54426	7.52159	7.41338	6.01467	6.78808	7.2289	8.05479	8.85627	8.89896	7.98846	7.31448	7.57591	6.53292	7.39526	7.35995	5.65202	7.01458	7.94474	7.63464	7.49416	7.24874	6.90109	7.24225	6.7573	5.90328	5.88391	5.14665	5.0904	5.86947	4.97992	4.85389	5.21298	5.31611	5.24907	5.28767	5.59324	6.85633	6.85726	6.90392	7.32105	6.0579	5.14585
D16Ertd472e	67102	1429897_a_at	DNA segment, Chr 16, ERATO Doi 472, expressed	11				4.54202	5.64774	6.18085	4.8102	4.63153	5.68409	6.91276	6.98799	6.2663	4.77354	5.28274	5.63106	4.691	5.43046	6.30308	4.79631	4.86121	5.41626	6.17097	5.59534	4.79754	4.32803	6.38478	4.52628	3.87533	4.67459	4.76277	4.70505	4.48158	4.75302	4.51911	4.65881	4.45796	4.37074	4.39224	4.59762	4.56078	4.77489	4.72254	4.31829	4.81492	4.21088
D17Ertd165e	51997	1446118_at	DNA segment, Chr 17, ERATO Doi 165, expressed	31				5.89262	6.31334	6.52176	5.45211	5.85763	4.82685	5.38763	5.74184	6.46112	6.68461	6.62596	6.31855	6.23839	5.69676	5.5623	5.07571	6.00852	5.04136	4.62001	4.97427	5.02641	5.39352	4.55262	4.80979	5.0638	5.08549	4.77065	4.68881	4.93741	4.69288	4.83798	5.09347	4.81842	4.80188	4.63875	4.9057	5.40436	5.07958	5.87061	4.97356	4.87068	4.69615
D17H6S56E-5	110956	1417822_at	DNA segment, Chr 17, human D6S56E 5	7		GO:0019028 (viral capsid),GO:0019031 (viral envelope)	GO:0005198 (structural molecule activity)	9.6724	9.62474	9.43066	9.55587	9.43771	9.3176	8.79179	8.69524	8.50341	9.40099	9.60408	9.38022	9.4086	9.47526	9.64427	9.55247	9.77266	9.70092	8.71994	8.60809	8.53689	9.51933	9.86493	9.9259	10.1249	9.9872	10.5243	10.5777	10.4591	10.4873	10.6645	10.6662	10.7722	10.7038	10.3481	10.8017	9.94454	9.64014	9.81028	9.67319	9.81362	10.4972
D2Ertd750e	51944	1423463_a_at	DNA segment, Chr 2, ERATO Doi 750, expressed	1	GO:0008150 (biological_process)	GO:0005575 (cellular_component),GO:0005634 (nucleus)	GO:0005515 (protein binding)	7.27325	7.0853	6.40172	6.80726	7.03638	6.90413	5.49864	5.06095	4.8151	6.90886	6.94131	6.70985	7.03773	6.79471	6.32625	7.25727	6.1878	6.31384	5.43569	5.04208	5.19794	6.18768	6.45246	5.24747	4.78048	6.33465	7.43175	7.68466	6.95273	7.01846	7.0658	7.33596	7.25566	7.05692	7.12934	7.60963	6.91794	7.12545	7.36635	7.06934	6.92793	7.4042
D330037H05Rik /// LOC673040 /// LOC677019	673040	1439010_at	RIKEN cDNA D330037H05 gene /// similar to La-related protein 4 (La ribonucleoprotein domain family member 4) /// similar to La-related protein 4 (La ribonucleoprotein domain family member 4)	23			GO:0000166 (nucleotide binding),GO:0003676 (nucleic acid binding),GO:0003723 (RNA binding)	9.07773	8.93785	8.96611	8.84955	8.81444	8.71491	7.88995	6.89313	7.38948	8.85883	8.92128	9.07043	9.12702	8.91299	8.25753	8.94366	8.67221	8.48576	7.48221	7.27726	7.40938	8.32957	7.76083	7.03	6.8968	8.62052	8.46963	8.48409	8.22555	8.27058	8.64337	8.67769	8.55887	8.30285	8.16206	8.43764	8.86299	9.00876	8.89123	8.7752	8.97972	8.37226
D330050I23Rik	399603	1434301_at	RIKEN cDNA D330050I23 gene	30				6.24905	4.79857	5.05737	6.70058	6.11114	5.85303	6.71859	6.11213	6.0906	5.98433	5.54189	5.26588	6.65301	6.43143	6.96824	6.92044	5.90625	5.63223	5.82422	6.11295	6.18533	5.7072	6.65688	7.22286	6.57975	6.14821	6.73857	6.56901	5.14858	6.24724	6.26437	6.26879	6.50929	6.26296	5.02239	6.79073	6.16476	5.39842	6.43849	4.95099	7.05294	7.31503
D3Ucla1	28146	1415828_a_at	DNA segment, Chr 3, University of California at Los Angeles 1	11	GO:0006605 (protein targeting),GO:0006810 (transport),GO:0015031 (protein transport)	GO:0005783 (endoplasmic reticulum),GO:0016020 (membrane),GO:0016021 (integral to membrane)		10.5935	11.1199	11.8334	10.2579	10.7491	11.3654	11.9114	11.982	12.1683	10.3234	11.1405	11.2145	10.4612	10.3608	10.4072	10.7911	9.79812	10.4523	11.4831	11.9367	12.2059	10.151	10.1308	10.1055	10.3294	9.86625	10.4786	10.3153	10.474	10.437	10.5172	10.408	10.4826	10.5815	10.0779	10.5413	10.3906	10.4957	10.4496	10.6202	10.1058	10.8191
D6Wsu176e	27999	1417953_at	DNA segment, Chr 6, Wayne State University 176, expressed	18	GO:0008150 (biological_process)	GO:0005576 (extracellular region)	GO:0005125 (cytokine activity)	9.85551	9.40384	9.06994	10.0068	9.75871	9.49971	8.63906	8.20752	7.84165	9.56158	9.47883	9.13245	9.58401	9.39063	8.90555	9.92849	8.97189	8.92513	8.65403	8.00988	7.48815	9.34795	9.09465	9.04663	9.23794	9.02802	9.48915	9.25261	9.2024	9.36436	9.3684	9.38102	9.53967	9.48569	9.15591	9.36482	9.33752	9.30445	9.51497	9.10125	9.25507	9.46048
D730048J04Rik	77856	1440451_at	RIKEN cDNA D730048J04 gene	22				3.1795	3.13983	3.17814	3.09525	3.16887	3.31699	3.27288	4.41487	4.40926	3.02038	3.1994	3.43351	3.33949	3.39449	2.91192	2.97295	3.27174	3.11042	3.6905	3.85867	3.79237	2.99736	3.13913	3.76629	3.52485	3.045	3.35176	3.24523	3.3618	3.52533	3.32625	3.30147	3.21633	2.9654	3.1541	3.21189	3.56477	3.41461	3.11984	3.26806	3.35183	3.37711
D830007B15Rik	330096	1460000_at	RIKEN cDNA D830007B15 gene	21				3.28953	3.9157	6.43162	3.06592	2.9358	3.92693	6.61392	7.76411	7.73656	2.95911	3.61951	4.99224	2.89217	3.27516	3.16687	2.80982	3.49711	6.62903	7.63007	7.80191	7.61536	2.97048	3.13054	3.40494	3.10742	2.93748	2.88917	2.81389	3.40363	2.79204	2.96433	2.67969	2.87476	2.99326	2.87873	2.74848	2.85828	3.19876	3.0953	4.57217	2.9094	2.97064
D930050J11	414326	1457484_at	hypothetical D930050J11	31				6.44862	7.90767	7.51553	6.33499	5.88731	6.35216	7.40662	8.41714	8.41598	8.15261	8.23881	7.78891	6.27249	6.83102	7.21419	7.15949	5.79516	6.41777	6.90555	7.00626	7.36825	6.24117	6.69894	6.67444	7.56695	6.9522	6.68774	5.1626	5.30048	6.66031	6.73412	6.83493	6.67728	6.16804	5.02541	6.88357	6.73655	7.12408	6.18545	6.88058	7.08271	7.1365
Dab2	13132	1420498_a_at	disabled homolog 2 (Drosophila)	7	GO:0000904 (cellular morphogenesis during differentiation),GO:0001701 (in utero embryonic development),GO:0006898 (receptor-mediated endocytosis),GO:0006907 (pinocytosis),GO:0007588 (excretion)	GO:0005905 (coated pit)	GO:0005515 (protein binding)	12.477	12.2243	11.4265	12.9045	12.821	12.7598	12.015	11.9343	11.8467	12.338	12.2066	11.4611	12.2402	12.1915	11.8206	12.8685	12.8454	12.8066	12.2838	11.8018	11.6261	12.7815	12.341	11.6757	11.1125	12.7988	12.841	12.8094	12.7557	12.9839	13.0017	12.9741	12.9612	12.9533	12.7407	12.8331	11.8386	11.6492	12.0309	11.6235	11.8469	12.6848
Dars	226414	1423800_at	aspartyl-tRNA synthetase	4	GO:0006412 (translation),GO:0006418 (tRNA aminoacylation for protein translation),GO:0006422 (aspartyl-tRNA aminoacylation),GO:0006461 (protein complex assembly)	GO:0005622 (intracellular),GO:0005625 (soluble fraction),GO:0005737 (cytoplasm)	GO:0000166 (nucleotide binding),GO:0003676 (nucleic acid binding),GO:0004046 (aminoacylase activity),GO:0004812 (aminoacyl-tRNA ligase activity),GO:0004815 (aspartate-tRNA ligase activity),GO:0005524 (ATP binding),GO:0016874 (ligase activity)	9.26573	9.0511	8.87811	9.19003	9.25423	9.12866	8.67198	8.12007	7.85998	8.8294	8.96763	8.62364	9.17681	8.95541	8.91932	9.34896	9.51917	9.49847	8.8624	8.40638	8.18787	9.49544	9.20313	8.56648	8.10869	9.57657	9.34842	9.32224	8.95652	9.45139	9.34573	9.46572	9.35718	9.29345	8.97511	9.15401	8.75158	8.67139	8.72634	8.66265	8.76242	8.99799
Dbf4	27214	1418334_at	DBF4 homolog (S. cerevisiae)	2	GO:0006260 (DNA replication),GO:0007049 (cell cycle),GO:0007089 (traversing start control point of mitotic cell cycle),GO:0007090 (regulation of S phase of mitotic cell cycle)	GO:0005622 (intracellular),GO:0005634 (nucleus)	GO:0003676 (nucleic acid binding),GO:0004674 (protein serine/threonine kinase activity),GO:0005515 (protein binding),GO:0008270 (zinc ion binding),GO:0016301 (kinase activity),GO:0046872 (metal ion binding)	9.06399	8.84349	8.58408	8.88411	8.83732	8.26164	6.85135	6.20859	6.79445	8.86055	8.84186	8.6953	8.94648	8.73068	7.61049	9.0737	8.04881	7.9467	6.71058	6.46136	6.62611	8.28972	7.70051	6.94038	6.95481	8.11327	9.03767	9.14755	8.97068	8.85637	8.9011	9.06917	8.89763	8.96524	8.64909	9.10234	8.73622	8.36538	9.07415	8.43182	8.51564	8.93601
Dbi	13167	1422432_at	diazepam binding inhibitor	2	GO:0006810 (transport)	GO:0005739 (mitochondrion)	GO:0000062 (acyl-CoA binding),GO:0005488 (binding),GO:0008289 (lipid binding)	10.1451	10.0331	10.0419	9.69973	9.95439	9.83616	9.76982	9.39381	9.13044	9.92301	10.02	9.97778	10.3637	10.2762	10.1639	9.98708	10.3079	10.2544	9.92666	9.92239	9.87008	10.0579	9.94944	9.85037	9.79695	10.3504	10.1658	10.3556	10.0859	10.1272	9.90727	10.0981	10.1401	10.0501	9.88423	10.3197	9.9007	9.5055	10.2269	10.0745	9.52694	10.5939
Dcbld2	73379	1437635_at	discoidin, CUB and LCCL domain containing 2	24	GO:0007155 (cell adhesion),GO:0030308 (negative regulation of cell growth),GO:0030522 (intracellular receptor-mediated signaling pathway),GO:0042060 (wound healing)	GO:0005887 (integral to plasma membrane),GO:0009986 (cell surface),GO:0016020 (membrane),GO:0016021 (integral to membrane)	GO:0005515 (protein binding)	7.27754	7.64255	8.84882	5.81397	6.37543	7.75824	8.71867	8.58788	8.48756	6.80321	7.60231	8.77168	7.14189	7.77629	9.20651	5.87653	7.67601	9.1137	9.51277	9.34021	8.97712	8.05109	9.32452	9.614	9.13385	7.1061	6.32808	6.62919	7.29253	6.52296	6.44937	6.64661	6.72366	6.61347	7.06679	6.49963	7.04498	7.80676	7.17185	8.20466	6.30811	6.61378
Dclre1a	55947	1417904_at	DNA cross-link repair 1A, PSO2 homolog (S. cerevisiae)	22	GO:0006281 (DNA repair),GO:0006289 (nucleotide-excision repair),GO:0006974 (response to DNA damage stimulus),GO:0007049 (cell cycle),GO:0007067 (mitosis),GO:0051301 (cell division)	GO:0005634 (nucleus)		6.86914	6.35377	6.27514	7.49742	6.75514	6.31575	6.03249	7.16848	7.48239	6.81493	6.56666	6.42767	6.78812	6.53938	6.20327	6.8251	7.33933	6.76815	6.85255	7.56324	7.73692	7.17943	7.06898	7.35065	7.54921	7.24965	6.70912	6.98568	6.8753	6.75192	6.79848	6.83105	6.87535	6.99306	6.76094	6.87489	7.01725	6.50605	6.82862	6.40948	6.17011	6.64543
Dclre1c	227525	1458361_at	DNA cross-link repair 1C, PSO2 homolog (S. cerevisiae)	8	GO:0000723 (telomere maintenance),GO:0006281 (DNA repair),GO:0006302 (double-strand break repair),GO:0006310 (DNA recombination),GO:0006955 (immune response),GO:0006974 (response to DNA damage stimulus),GO:0007001 (chromosome organization and biogenesis (sensu Eukaryota)),GO:0010212 (response to ionizing radiation),GO:0030183 (B cell differentiation)	GO:0005634 (nucleus)	GO:0000014 (single-stranded DNA specific endodeoxyribonuclease activity),GO:0000287 (magnesium ion binding),GO:0004518 (nuclease activity),GO:0004519 (endonuclease activity),GO:0004527 (exonuclease activity),GO:0008409 (5'-3' exonuclease activity),GO:0016787 (hydrolase activity)	5.81132	5.57102	5.38072	5.95904	5.95275	5.79913	6.04401	6.40237	6.26964	5.88354	5.44373	5.71008	5.73993	5.69663	5.91295	5.88674	5.38312	5.48443	6.10849	6.16447	6.64141	5.80299	6.07774	5.98964	6.27943	5.4084	5.57329	5.5153	5.64529	5.67392	5.75157	5.86635	5.77994	5.32117	5.72235	5.78401	5.36189	5.62999	5.85205	5.60268	6.04849	5.69552
Dcps	69305	1424080_at	decapping enzyme, scavenger	4	GO:0000184 (mRNA catabolic process, nonsense-mediated decay)	GO:0005634 (nucleus)	GO:0016787 (hydrolase activity)	7.42863	7.25986	7.25476	7.29828	7.39982	7.18111	6.81134	6.17247	6.17348	7.13387	7.53947	7.22725	7.51051	7.17767	6.85497	7.43697	7.19204	7.14703	6.50532	6.39506	6.09409	7.23032	7.20519	6.29981	6.19906	7.33635	7.64383	7.6204	7.50718	7.64683	7.44376	7.73177	7.48082	7.468	7.1222	7.67682	7.44243	6.68885	7.00741	6.97516	6.62425	7.5202
Ddb1	13194	1415735_at	damage specific DNA binding protein 1	20		GO:0005634 (nucleus)	GO:0003676 (nucleic acid binding)	9.24181	9.28369	9.4515	9.42136	9.30056	9.28231	9.15697	8.86154	8.54121	9.31293	9.43586	9.72992	9.19572	9.20953	9.27084	9.4861	9.53274	9.46533	9.13049	8.86434	8.63532	9.20585	9.13342	8.87939	8.85425	9.58747	9.32017	9.47772	9.24945	9.47894	9.35216	9.31621	9.38445	9.40393	9.10201	9.47372	9.52963	9.32015	9.47339	9.42112	9.12855	9.43699
Ddef1	13196	1435059_at	development and differentiation enhancing	5	GO:0006355 (regulation of transcription, DNA-dependent),GO:0043087 (regulation of GTPase activity)	GO:0005634 (nucleus),GO:0016020 (membrane)	GO:0003677 (DNA binding),GO:0003700 (transcription factor activity),GO:0005096 (GTPase activator activity),GO:0005515 (protein binding),GO:0008270 (zinc ion binding),GO:0046872 (metal ion binding)	8.1799	8.10895	8.41705	8.15509	8.05582	8.06035	8.05968	6.07913	5.43161	7.78211	7.88458	7.9759	7.84324	7.82209	7.88226	8.26533	8.33294	8.36587	8.15336	6.59619	5.27637	8.51751	8.35003	6.26177	5.65552	8.39306	8.48193	8.65161	8.19291	8.36704	8.67295	8.77785	8.47962	8.29846	8.20819	8.64926	7.9278	7.76139	8.30783	7.99432	8.2252	8.2828
Ddhd2	72108	1435376_at	DDHD domain containing 2	5	GO:0008150 (biological_process)	GO:0005575 (cellular_component)	GO:0003674 (molecular_function),GO:0046872 (metal ion binding)	8.67986	8.51085	8.41676	8.95246	8.53901	8.26067	7.40811	6.97978	6.83291	8.58057	8.43743	8.43686	8.56426	8.38198	8.04535	8.77038	8.42681	8.39367	7.7987	7.22486	7.08071	8.61639	8.1839	7.72059	7.31266	8.57502	8.49413	8.37795	8.15848	8.27676	8.43338	8.46892	8.29243	8.28363	7.81064	8.49166	8.34471	8.37265	8.33248	8.24864	8.23339	8.52937
Ddit3	13198	1417516_at	DNA-damage inducible transcript 3	22	GO:0000074 (regulation of progression through cell cycle),GO:0006350 (transcription),GO:0006355 (regulation of transcription, DNA-dependent),GO:0006974 (response to DNA damage stimulus),GO:0006983 (ER overload response),GO:0007049 (cell cycle),GO:0007050 (cell cycle arrest),GO:0030503 (regulation of cell redox homeostasis),GO:0030968 (unfolded protein response),GO:0042789 (mRNA transcription from…	GO:0005634 (nucleus)	GO:0003677 (DNA binding),GO:0003700 (transcription factor activity),GO:0003714 (transcription corepressor activity),GO:0005515 (protein binding),GO:0043565 (sequence-specific DNA binding),GO:0046983 (protein dimerization activity)	9.87957	9.54107	9.80494	10.4483	9.54565	8.6487	8.30256	9.56532	10.5279	9.88707	9.91508	10.0039	9.47583	8.74506	8.78363	9.95656	7.95261	8.06183	8.82103	9.07235	10.0906	9.38606	8.87311	9.41468	10.2692	8.20401	8.99822	8.73296	8.39473	8.77933	8.72928	8.76591	8.99934	8.86218	7.87744	8.81264	8.54907	8.0535	8.1668	8.12208	8.08042	8.35214
Ddx1	104721	1415915_at	DEAD (Asp-Glu-Ala-Asp) box polypeptide 1	20	GO:0000245 (spliceosome assembly),GO:0006096 (glycolysis),GO:0006446 (regulation of translational initiation),GO:0007046 (),GO:0007275 (multicellular organismal development),GO:0007283 (spermatogenesis),GO:0009987 (cellular process),GO:0042254 (ribosome biogenesis and assembly),GO:0050875 ()		GO:0000166 (nucleotide binding),GO:0003676 (nucleic acid binding),GO:0003723 (RNA binding),GO:0003724 (RNA helicase activity),GO:0004386 (helicase activity),GO:0004618 (phosphoglycerate kinase activity),GO:0005524 (ATP binding),GO:0008026 (ATP-dependent helicase activity),GO:0016787 (hydrolase activity),GO:0016887 (ATPase activity)	9.33769	9.41804	9.39641	9.50268	9.18137	9.20648	9.24735	9.17248	8.86075	9.25987	9.29508	9.41583	9.18624	9.22931	9.31842	9.33216	9.40359	9.56646	9.40116	9.24193	9.04167	9.41622	9.46354	9.27191	9.01819	9.55919	9.40486	9.43535	9.35838	9.49177	9.54664	9.58144	9.41667	9.47013	9.06282	9.40425	8.76095	8.76427	9.02772	8.84379	8.64557	9.13865
Ddx18	66942	1416071_at	DEAD (Asp-Glu-Ala-Asp) box polypeptide 18	23			GO:0000166 (nucleotide binding),GO:0003676 (nucleic acid binding),GO:0003723 (RNA binding),GO:0004004 (ATP-dependent RNA helicase activity),GO:0004386 (helicase activity),GO:0005524 (ATP binding),GO:0008026 (ATP-dependent helicase activity),GO:0016787 (hydrolase activity)	7.86339	7.69403	7.52796	8.23672	7.9876	7.74155	7.28053	7.04652	7.02912	7.82138	7.66231	7.70558	7.86329	7.38183	7.27939	8.18975	8.44744	8.19222	7.42675	7.26504	7.083	7.82034	7.46419	6.95152	6.56372	8.44128	7.8628	8.07152	7.8083	7.84699	7.8768	7.86625	8.04153	7.86389	7.59583	7.80166	7.66713	7.55639	7.44778	7.499	7.48514	7.63906
Ddx21	56200	1448270_at	DEAD (Asp-Glu-Ala-Asp) box polypeptide 21	23		GO:0005634 (nucleus),GO:0005730 (nucleolus)	GO:0000166 (nucleotide binding),GO:0003676 (nucleic acid binding),GO:0003723 (RNA binding),GO:0003724 (RNA helicase activity),GO:0004386 (helicase activity),GO:0005524 (ATP binding),GO:0008026 (ATP-dependent helicase activity),GO:0016787 (hydrolase activity)	8.40614	8.22363	8.17498	8.06086	8.26364	8.21664	7.70722	7.30527	7.10317	8.09571	8.26036	8.23127	8.1909	8.15687	7.75569	8.33233	8.76714	8.60531	7.80953	7.31809	6.93473	8.05473	7.85365	7.11349	6.33717	8.70415	7.99746	8.20223	8.28078	8.20777	8.10885	8.32624	8.16578	7.96469	7.89493	8.08173	7.23551	7.66109	7.56713	7.37713	7.52313	7.73077
Ddx4	13206	1427242_at	DEAD (Asp-Glu-Ala-Asp) box polypeptide 4	8	GO:0007275 (multicellular organismal development)	GO:0005634 (nucleus),GO:0005737 (cytoplasm)	GO:0000166 (nucleotide binding),GO:0003676 (nucleic acid binding),GO:0003678 (DNA helicase activity),GO:0003723 (RNA binding),GO:0003724 (RNA helicase activity),GO:0004386 (helicase activity),GO:0005515 (protein binding),GO:0005524 (ATP binding),GO:0008026 (ATP-dependent helicase activity),GO:0016787 (hydrolase activity)	2.70016	2.8185	2.83685	2.66369	2.63371	2.75847	4.07269	5.75422	5.58084	2.74804	2.80276	2.77076	2.96049	2.99921	5.8707	2.78692	2.97411	2.89984	4.49061	6.25643	6.36245	2.77842	7.23365	8.10995	7.93214	2.70995	2.66028	2.67848	2.68098	2.6763	2.80701	2.75513	2.67815	2.6955	2.63945	2.7317	2.57631	2.71313	2.8009	2.78094	2.91432	2.78502
Ddx46	212880	1455103_at	DEAD (Asp-Glu-Ala-Asp) box polypeptide 46	4	GO:0006397 (mRNA processing),GO:0008380 (RNA splicing)	GO:0005634 (nucleus)	GO:0000166 (nucleotide binding),GO:0003676 (nucleic acid binding),GO:0003723 (RNA binding),GO:0004386 (helicase activity),GO:0005524 (ATP binding),GO:0008026 (ATP-dependent helicase activity),GO:0016787 (hydrolase activity)	8.24871	8.12918	8.15454	8.53003	7.98747	7.93857	7.74339	7.50163	7.22488	8.08174	8.2396	8.14265	8.04629	7.89418	7.88439	8.12391	8.30146	8.48148	8.11504	7.90675	7.50062	8.30023	8.04472	8.0036	7.60296	8.52963	8.24009	8.17833	8.07078	8.04841	8.26046	8.26315	8.25976	7.9653	7.86544	8.26322	7.70439	7.73259	7.95294	7.99027	7.89222	7.96156
Ddx58	230073	1446457_at	DEAD (Asp-Glu-Ala-Asp) box polypeptide 58	13	GO:0006955 (immune response),GO:0009615 (response to virus),GO:0042981 (regulation of apoptosis),GO:0045087 (innate immune response)	GO:0005622 (intracellular)	GO:0000166 (nucleotide binding),GO:0003676 (nucleic acid binding),GO:0003723 (RNA binding),GO:0004386 (helicase activity),GO:0005515 (protein binding),GO:0005524 (ATP binding),GO:0008026 (ATP-dependent helicase activity),GO:0016787 (hydrolase activity)	4.6408	5.52345	6.60006	4.79988	5.09559	6.63767	7.00367	7.93927	7.69153	5.59256	5.30471	5.58284	5.06031	7.12049	8.41193	4.92673	5.48016	7.42899	7.47294	7.15401	7.36594	6.9911	7.80376	7.49649	7.26721	5.66306	4.78512	4.84862	4.90104	4.81034	4.63761	4.81586	4.97698	5.07017	5.18989	4.85869	4.66998	4.85079	4.59362	4.68495	4.35909	4.88196
Dek	110052	1452659_at	DEK oncogene (DNA binding)	7	GO:0006357 (regulation of transcription from RNA polymerase II promoter),GO:0006614 (SRP-dependent cotranslational protein targeting to membrane),GO:0007165 (signal transduction),GO:0019079 (viral genome replication)	GO:0005634 (nucleus),GO:0005786 (signal recognition particle, endoplasmic reticulum targeting)	GO:0003676 (nucleic acid binding),GO:0003677 (DNA binding),GO:0003704 (specific RNA polymerase II transcription factor activity),GO:0003723 (RNA binding),GO:0005525 (GTP binding),GO:0042393 (histone binding)	11.5765	11.3049	10.7355	11.4767	11.4132	11.3592	11.2225	11.2122	11.1898	11.2118	11.2075	10.7181	11.3671	11.3204	11.6176	11.639	11.4031	11.4365	11.4232	11.4065	11.3812	11.5242	11.9615	11.9568	11.8259	11.4863	11.8523	11.7874	11.6172	11.6601	11.7904	11.8902	11.9074	11.9202	11.613	11.7878	11.0901	10.9063	11.3379	10.9158	11.0448	11.4734
Denr	68184	1420368_at	density-regulated protein	21	GO:0006413 (translational initiation)		GO:0003743 (translation initiation factor activity)	9.95356	10.3423	11.0205	9.06998	9.55414	10.167	10.515	10.51	10.6192	9.25524	10.2064	10.9388	9.42325	9.72922	10.0792	9.267	9.30506	9.62335	9.96023	10.0551	10.0986	9.50723	9.59599	9.60009	9.48012	9.31601	9.24062	9.1533	9.55811	9.20909	9.17233	9.10846	9.21425	9.16194	9.1663	9.18112	8.76573	8.86056	8.84018	9.11555	8.31717	8.98145
Depdc1b	218581	1434789_at	DEP domain containing 1B	3	GO:0007165 (signal transduction),GO:0007242 (intracellular signaling cascade),GO:0008150 (biological_process)	GO:0005575 (cellular_component),GO:0005622 (intracellular)	GO:0003674 (molecular_function)	6.11698	5.75266	4.67551	5.96068	6.11612	5.9066	4.83624	4.81268	4.48828	5.97304	5.83871	5.57245	5.97445	5.75258	5.07687	6.0736	5.67855	5.28694	4.8856	4.56152	4.27352	5.39261	4.77234	4.73049	5.12745	5.53692	6.4532	6.64727	6.43836	6.63986	6.55544	6.51597	6.34104	6.52272	6.47296	6.55376	6.93337	6.83572	7.09638	6.4844	6.82559	6.27951
Derl1	67819	1423082_at	Der1-like domain family, member 1	22	GO:0006810 (transport),GO:0006986 (response to unfolded protein),GO:0015031 (protein transport),GO:0019060 (intracellular transport of viral proteins in host cell),GO:0030433 (ER-associated protein catabolic process),GO:0030968 (unfolded protein response),GO:0030970 (retrograde protein transport, ER to cytosol),GO:0045184 (establishment of protein localization)	GO:0005783 (endoplasmic reticulum),GO:0016020 (membrane),GO:0016021 (integral to membrane),GO:0030176 (integral to endoplasmic reticulum membrane)	GO:0004872 (receptor activity),GO:0005515 (protein binding),GO:0042288 (MHC class I protein binding)	8.85501	8.87997	9.0354	8.66075	9.01666	8.96566	8.55125	8.35146	8.41917	8.63938	9.05587	8.75428	9.1452	8.97782	8.7301	9.19977	8.37748	8.43713	8.18692	8.30008	8.43884	8.50519	8.50524	7.98751	8.47003	8.48641	8.9661	8.96632	8.72882	8.90757	9.06892	8.93945	8.63971	8.48954	8.35799	8.89123	8.93783	8.56478	8.72555	8.56021	8.68707	9.01084
Dfna5h	54722	1421534_at	deafness, autosomal dominant 5 homolog (human)	4	GO:0007605 (sensory perception of sound),GO:0035315 (hair cell differentiation)	GO:0005575 (cellular_component)	GO:0003674 (molecular_function)	7.58234	8.43041	8.68135	7.88257	7.82392	7.77197	8.12763	7.82983	7.85288	8.22218	8.68882	7.87549	8.44293	7.99981	7.75565	7.9989	8.87013	8.90772	7.79821	7.7706	7.61787	8.15142	8.00903	7.87249	7.00921	8.88245	8.82167	8.88862	8.73475	8.39471	8.61477	8.46106	8.72655	8.52186	7.84425	8.51691	8.66639	8.99029	8.63317	8.31536	9.19695	8.51559
Dgkd	227333	1433564_at	diacylglycerol kinase, delta	16	GO:0007205 (protein kinase C activation),GO:0007242 (intracellular signaling cascade),GO:0046339 (diacylglycerol metabolic process)	GO:0005886 (plasma membrane),GO:0016023 (cytoplasmic membrane-bound vesicle)	GO:0004143 (diacylglycerol kinase activity),GO:0042803 (protein homodimerization activity),GO:0046982 (protein heterodimerization activity)	9.48433	9.23827	8.69707	9.76538	9.40591	8.91538	7.89438	7.58458	7.43406	9.35179	9.39327	9.14021	9.54683	9.38955	8.50485	9.45635	9.85047	9.42447	7.70972	7.46048	6.97681	9.55156	8.62411	8.40766	8.74639	9.7386	9.18079	9.33058	8.98015	9.25057	9.22566	9.55089	9.32254	9.2744	9.06466	9.17625	8.99942	8.84952	9.06553	8.6412	8.9675	9.09268
Dgkh	380921	1457213_a_at	diacylglycerol kinase, eta	17	GO:0007205 (protein kinase C activation),GO:0007242 (intracellular signaling cascade),GO:0046339 (diacylglycerol metabolic process)	GO:0005737 (cytoplasm),GO:0005768 (endosome)	GO:0004143 (diacylglycerol kinase activity),GO:0042803 (protein homodimerization activity)	5.53727	6.03912	6.85809	5.77571	5.77106	5.82607	7.498	7.63374	7.67107	5.70113	6.22855	6.56422	5.87569	5.80097	6.62309	5.66963	6.06311	6.01659	7.46296	7.58742	7.61667	5.9197	6.15044	6.28279	5.96535	5.97814	5.67407	5.79919	5.83272	5.98277	5.85994	5.81457	5.88642	5.73773	5.70981	5.83786	5.57648	5.78856	5.76586	5.86729	5.76984	5.80262
Dhcr7	13360	1448619_at	7-dehydrocholesterol reductase	19	GO:0001568 (blood vessel development),GO:0006694 (steroid biosynthetic process),GO:0006695 (cholesterol biosynthetic process),GO:0008610 (lipid biosynthetic process),GO:0016126 (sterol biosynthetic process),GO:0030154 (cell differentiation),GO:0030324 (lung development),GO:0042127 (regulation of cell proliferation)	GO:0005640 (nuclear outer membrane),GO:0005783 (endoplasmic reticulum),GO:0016020 (membrane),GO:0016021 (integral to membrane)	GO:0016491 (oxidoreductase activity),GO:0047598 (7-dehydrocholesterol reductase activity)	7.31261	6.95084	6.61961	7.69325	7.9164	7.54199	6.30637	5.59809	5.42504	7.61705	7.37354	7.2394	7.19677	7.19566	6.81025	8.00591	7.49017	7.38213	6.62418	5.85035	5.88466	7.58047	7.07214	6.8557	6.59476	7.74398	7.73318	7.76335	7.62721	7.79976	7.86978	7.67232	7.36766	7.24459	7.07729	7.90188	7.86194	7.72535	7.9306	7.47896	7.96391	8.45486
Dhfr	13361	1419172_at	dihydrofolate reductase	7	GO:0006545 (glycine biosynthetic process),GO:0006730 (one-carbon compound metabolic process),GO:0009165 (nucleotide biosynthetic process)		GO:0004146 (dihydrofolate reductase activity),GO:0016491 (oxidoreductase activity),GO:0050661 (NADP binding)	7.57939	7.21183	6.68738	7.38244	7.39347	7.14553	6.37752	6.40463	6.55144	7.20336	7.41261	7.16373	7.33081	7.02352	6.70796	7.43167	8.11538	8.05876	7.16663	6.83743	6.53268	7.95666	7.79508	7.30107	7.09383	8.42201	8.35618	8.18733	8.03071	8.33552	8.35591	8.33173	8.4238	8.04592	7.91927	8.10981	7.41176	6.95456	7.3037	6.60826	6.92091	7.45977
Dhrs4	28200	1419382_a_at	dehydrogenase/reductase (SDR family) member 4	7	GO:0008152 (metabolic process),GO:0042574 (retinal metabolic process)	GO:0005739 (mitochondrion),GO:0005777 (peroxisome)	GO:0001758 (retinal dehydrogenase activity),GO:0004090 (carbonyl reductase (NADPH) activity),GO:0016491 (oxidoreductase activity)	7.4215	7.35426	7.3638	7.36095	7.35397	7.23342	7.00237	6.95604	6.78843	7.26391	7.35197	7.08548	7.51828	7.35078	7.13297	7.54328	7.12398	7.18912	6.98564	7.09946	6.98923	7.2164	7.31771	7.20832	7.14367	7.1917	7.63056	7.49954	7.36262	7.3686	7.76128	7.57206	7.35864	7.35457	6.98025	7.59453	7.04897	7.09552	7.19798	7.2822	7.20175	7.52658
Dhrs7	66375	1426440_at	dehydrogenase/reductase (SDR family) member 7	5	GO:0008152 (metabolic process)		GO:0016491 (oxidoreductase activity)	8.94758	8.88746	8.79539	9.27158	8.799	8.69999	8.35209	8.53199	8.25988	8.76906	8.90853	8.6379	8.90317	8.76712	8.54088	8.99433	8.89948	8.92348	8.88831	8.70343	8.27372	9.09515	9.04839	8.83257	8.58431	8.91781	8.86669	8.82031	8.69816	8.77787	8.87315	8.81588	8.87808	8.89271	8.43949	8.89119	8.81672	8.70172	9.20855	8.87556	8.75763	8.95434
Dhx15	13204	1416145_at	DEAH (Asp-Glu-Ala-His) box polypeptide 15	4	GO:0006397 (mRNA processing),GO:0008380 (RNA splicing)	GO:0005622 (intracellular),GO:0005634 (nucleus),GO:0005689 (U12-dependent spliceosome)	GO:0000166 (nucleotide binding),GO:0003676 (nucleic acid binding),GO:0003724 (RNA helicase activity),GO:0004386 (helicase activity),GO:0005524 (ATP binding),GO:0008026 (ATP-dependent helicase activity),GO:0016787 (hydrolase activity),GO:0016887 (ATPase activity),GO:0017111 (nucleoside-triphosphatase activity)	10.5593	10.5269	10.4381	10.4482	10.5753	10.6276	10.377	9.89251	9.7873	10.287	10.4123	10.2218	10.3557	10.4219	10.1325	10.5839	10.6124	10.6164	10.2701	10.2175	10.0062	10.369	10.0862	9.77091	9.54673	10.6164	10.5905	10.6074	10.6133	10.5426	10.628	10.6418	10.5623	10.6142	10.3911	10.5855	10.2269	10.0815	10.1553	9.94149	9.90193	10.4328
Diap3	56419	1422944_a_at	diaphanous homolog 3 (Drosophila)	1	GO:0016043 (cellular component organization and biogenesis),GO:0030036 (actin cytoskeleton organization and biogenesis)		GO:0003676 (nucleic acid binding),GO:0003779 (actin binding),GO:0004522 (pancreatic ribonuclease activity),GO:0017048 (Rho GTPase binding)	6.25781	6.94612	6.85809	6.17917	6.19926	6.15068	6.27656	5.91807	5.59168	7.056	7.03608	7.28489	6.52951	6.63821	6.75171	6.25209	6.00236	6.01878	5.85926	5.73552	5.02116	5.72988	6.13373	5.67962	5.2188	6.16842	7.14196	7.11434	7.03216	7.36264	7.37581	7.43202	7.14857	6.87454	6.50734	7.2402	6.88376	6.8823	7.11205	6.774	6.97012	6.99156
Dip2c	208440	1429064_at	DIP2 disco-interacting protein 2 homolog C (Drosophila)	4	GO:0008152 (metabolic process)	GO:0005634 (nucleus)	GO:0003824 (catalytic activity),GO:0008134 (transcription factor binding),GO:0016874 (ligase activity)	7.1499	6.66069	6.82438	7.11943	6.69508	6.72249	6.42854	6.5793	6.74111	6.65301	6.95812	6.75366	6.74145	7.0544	7.00236	6.72406	8.1559	8.00345	7.48157	6.70504	6.34723	7.66061	7.50164	6.91115	6.11876	8.08012	6.92033	7.03856	6.82071	6.89944	7.05697	7.07283	7.00814	6.66707	6.8732	6.92258	6.83091	7.14581	7.08337	6.71598	7.18189	6.91668
Dip3b	216190	1426743_at	Dip3 beta	5	GO:0007049 (cell cycle),GO:0007165 (signal transduction),GO:0008283 (cell proliferation)	GO:0005634 (nucleus),GO:0005737 (cytoplasm),GO:0010008 (endosome membrane),GO:0016020 (membrane),GO:0016581 (NuRD complex)	GO:0005515 (protein binding),GO:0017137 (Rab GTPase binding)	9.7025	9.35906	8.57126	10.1713	9.47143	9.13554	7.79713	6.38281	6.8868	9.52924	9.35934	8.83503	9.62345	9.38165	8.59657	9.75919	8.91625	8.81208	7.89206	6.51609	6.18827	9.45394	8.39895	6.96317	6.59114	8.88697	9.08873	9.22218	8.83104	9.06067	9.18042	9.16499	9.1265	9.10314	8.71051	9.19437	9.22124	8.91487	9.45198	8.80576	9.22673	9.59305
Dleu2	328425	1427410_at	deleted in lymphocytic leukemia, 2	8	GO:0008150 (biological_process)	GO:0005575 (cellular_component)	GO:0003674 (molecular_function)	5.58278	5.10106	5.29394	5.58212	5.29623	5.14804	4.88383	6.3612	6.43419	4.82899	5.09045	5.08032	5.43671	5.14251	5.36046	5.34267	6.71342	6.53694	6.26786	6.8823	7.23765	6.6853	6.96198	7.03997	7.6428	6.5085	5.54367	5.49151	5.40636	5.71837	6.21012	5.74305	5.71672	5.48981	5.4654	5.34193	5.16397	4.03772	4.93209	4.69266	3.92119	5.37226
Dlg7	218977	1455730_at	discs, large homolog 7 (Drosophila)	1	GO:0000087 (M phase of mitotic cell cycle),GO:0007049 (cell cycle),GO:0007079 (mitotic chromosome movement towards spindle pole),GO:0007267 (cell-cell signaling),GO:0008283 (cell proliferation),GO:0045842 (positive regulation of mitotic metaphase/anaphase transition)	GO:0005634 (nucleus),GO:0031616 (spindle pole centrosome)	GO:0004721 (phosphoprotein phosphatase activity),GO:0005515 (protein binding)	7.67199	7.46659	7.01893	7.85283	7.68976	7.30574	5.99387	6.36855	6.46339	7.55422	7.49398	7.16775	7.36617	7.4224	6.24799	7.51817	7.57183	7.4568	6.32886	6.31908	6.39046	7.55775	7.07339	6.68698	6.68128	7.59878	8.22283	8.55456	8.22472	7.99093	8.41456	8.23566	8.18317	8.20057	8.05795	8.36689	7.90917	7.64623	8.17469	7.56848	7.60642	7.65753
Dna2l	327762	1452210_at	DNA2 DNA replication helicase 2-like (yeast)	3	GO:0006260 (DNA replication)		GO:0000166 (nucleotide binding),GO:0003677 (DNA binding),GO:0004386 (helicase activity),GO:0005524 (ATP binding),GO:0016787 (hydrolase activity)	6.77831	5.29558	4.33906	7.08138	6.5732	5.51227	3.9641	3.99045	4.15593	6.29177	5.55582	4.5697	6.42204	5.82758	5.42854	6.91254	7.32626	6.42753	4.1839	4.22117	3.838	6.71228	4.98155	4.73697	5.04298	7.47755	7.58161	7.71242	7.08602	7.39477	7.47026	7.30872	7.539	7.42606	7.01349	7.58188	7.11384	6.57797	7.33645	6.29507	7.14669	6.83772
Dnaja1	15502	1460179_at	DnaJ (Hsp40) homolog, subfamily A, member 1	9	GO:0006457 (protein folding),GO:0007283 (spermatogenesis),GO:0009408 (response to heat),GO:0030317 (sperm motility),GO:0030521 (androgen receptor signaling pathway)		GO:0008270 (zinc ion binding),GO:0031072 (heat shock protein binding),GO:0046872 (metal ion binding),GO:0050750 (low-density lipoprotein receptor binding),GO:0051082 (unfolded protein binding)	8.89435	9.05134	9.24638	8.81343	8.56112	8.95847	9.60613	9.82657	9.84216	8.7506	8.88864	8.90293	8.72411	8.79772	9.57286	8.41361	8.95839	9.11027	10.0082	10.2436	10.1009	8.83493	9.48291	9.6892	9.90351	8.75383	8.45084	8.43397	8.68632	8.57959	8.77066	8.56268	8.56169	8.65813	8.50288	8.44365	8.2533	8.64453	8.68654	8.57246	8.44297	8.27459
Dnaja2	56445	1457233_at	DnaJ (Hsp40) homolog, subfamily A, member 2	25	GO:0000074 (regulation of progression through cell cycle),GO:0000080 (G1 phase of mitotic cell cycle),GO:0006457 (protein folding),GO:0008284 (positive regulation of cell proliferation)	GO:0016020 (membrane)	GO:0008270 (zinc ion binding),GO:0031072 (heat shock protein binding),GO:0046872 (metal ion binding),GO:0051082 (unfolded protein binding)	8.6904	9.66443	9.40806	9.5067	9.27407	9.81101	9.99916	9.96807	9.85998	9.28838	9.44048	9.2922	9.54855	10.0128	9.84776	7.91773	9.81134	9.94228	9.85511	9.3777	9.06094	9.82898	10.4303	9.84914	9.28083	8.63606	7.42591	8.60874	8.22083	7.16762	7.33176	7.29086	7.39688	8.01704	7.92364	7.38943	7.82069	8.40246	8.81482	8.475	7.27681	7.22047
Dnajb10	56812	1448657_a_at	DnaJ (Hsp40) homolog, subfamily B, member 10	11	GO:0006457 (protein folding)	GO:0016020 (membrane),GO:0016021 (integral to membrane)	GO:0031072 (heat shock protein binding)	5.90985	5.49755	6.19654	4.83128	5.19247	5.85168	5.06297	4.88225	4.88669	5.0011	5.50879	6.34865	5.02409	5.75258	5.4556	4.72655	5.81012	6.98378	5.71805	5.53187	5.23936	5.69764	5.41145	5.1982	5.10852	5.1947	4.454	4.7102	5.18639	4.46661	4.83791	4.68074	4.4052	3.97722	4.41091	4.50101	4.55777	4.62201	5.08019	5.32779	4.45816	4.48465
Dnajc1	13418	1420501_at	DnaJ (Hsp40) homolog, subfamily C, member 1	9	GO:0006417 (regulation of translation),GO:0006445 (),GO:0006457 (protein folding),GO:0045449 (regulation of transcription),GO:0045861 (negative regulation of proteolysis),GO:0050708 (regulation of protein secretion)	GO:0005634 (nucleus),GO:0005783 (endoplasmic reticulum),GO:0005788 (endoplasmic reticulum lumen),GO:0005792 (microsome),GO:0016020 (membrane),GO:0016021 (integral to membrane)	GO:0001671 (ATPase stimulator activity),GO:0003677 (DNA binding),GO:0005515 (protein binding),GO:0030188 (chaperone regulator activity),GO:0030192 (Hsp70/Hsc70 protein regulator activity),GO:0031072 (heat shock protein binding),GO:0043022 (ribosome binding),GO:0051082 (unfolded protein binding),GO:0051087 (chaperone binding)	6.9234	6.89242	7.23592	7.16802	7.042	7.02715	7.75348	7.8545	8.02442	7.09006	7.03798	7.22833	6.85504	6.82423	7.30794	6.91388	7.55999	7.45264	7.56991	8.19371	8.51784	7.51619	7.64723	7.95921	7.87834	7.39112	7.11822	7.05533	7.00276	7.00073	6.97865	7.05056	7.19342	7.20154	6.93484	6.97367	6.95633	7.32509	7.02003	7.3403	7.05013	6.95013
Dnajc3	19107	1433887_at	DnaJ (Hsp40) homolog, subfamily C, member 3	5	GO:0006457 (protein folding),GO:0006469 (negative regulation of protein kinase activity),GO:0006986 (response to unfolded protein)	GO:0005615 (extracellular space),GO:0005737 (cytoplasm)	GO:0004860 (protein kinase inhibitor activity),GO:0005488 (binding),GO:0031072 (heat shock protein binding)	8.83222	8.4469	8.48464	8.30592	8.29078	8.18938	7.64011	6.42057	5.97344	8.01199	8.34436	8.34743	8.50778	8.49541	8.11927	8.68965	8.3794	8.25119	7.72268	6.92249	6.09747	8.49121	7.98554	7.57244	7.12608	8.53803	8.50783	8.4629	8.22814	8.61718	8.65122	8.70544	8.87094	8.65649	8.41028	8.58105	7.46879	8.08045	8.01201	7.85318	7.89264	8.24875
Dnajc9	108671	1426473_at	DnaJ (Hsp40) homolog, subfamily C, member 9	3	GO:0006457 (protein folding)		GO:0031072 (heat shock protein binding)	8.35937	8.20877	7.55121	8.65048	8.13653	7.81892	6.75169	6.72177	6.66043	8.09883	8.14414	7.62608	8.31424	8.02763	7.62425	8.41061	8.72042	8.48888	7.64775	6.89352	6.71997	8.71613	8.06596	7.44283	7.15314	8.88387	9.32064	9.23195	8.96648	9.2909	9.46687	9.47909	9.26635	9.15146	8.89048	9.18808	8.01205	8.05849	8.50551	7.96793	8.24245	8.5524
Dnase1l3	13421	1421057_at	deoxyribonuclease 1-like 3	8	GO:0006308 (DNA catabolic process),GO:0006309 (DNA fragmentation during apoptosis),GO:0006915 (apoptosis)	GO:0005615 (extracellular space),GO:0005634 (nucleus)	GO:0003677 (DNA binding),GO:0004518 (nuclease activity),GO:0004519 (endonuclease activity),GO:0004536 (deoxyribonuclease activity),GO:0005509 (calcium ion binding),GO:0016787 (hydrolase activity)	3.51335	3.55123	3.57133	3.64288	3.61353	3.74657	3.90529	4.64351	4.62429	3.7511	3.49451	3.63727	3.19859	4.00441	4.43453	3.4808	3.62662	3.67894	4.3944	4.65348	4.3411	3.71827	5.13373	6.41338	6.27513	3.55759	3.83531	3.56765	3.84962	3.92963	3.82956	3.60925	3.60896	3.47107	3.36694	3.83776	3.34756	3.98467	3.6513	3.54628	3.76925	3.77558
Dnmt1	13433	1422946_a_at	DNA methyltransferase (cytosine-5) 1	16	GO:0006306 (DNA methylation),GO:0006350 (transcription),GO:0006355 (regulation of transcription, DNA-dependent),GO:0016458 (gene silencing),GO:0045892 (negative regulation of transcription, DNA-dependent)	GO:0000792 (heterochromatin),GO:0005576 (extracellular region),GO:0005634 (nucleus),GO:0005657 (replication fork)	GO:0003677 (DNA binding),GO:0003824 (catalytic activity),GO:0003886 (DNA (cytosine-5-)-methyltransferase activity),GO:0005515 (protein binding),GO:0008134 (transcription factor binding),GO:0008168 (methyltransferase activity),GO:0008270 (zinc ion binding),GO:0016564 (transcriptional repressor activity),GO:0016740 (transferase activity),GO:0046872 (metal ion binding)	9.34344	9.06607	8.04685	9.22789	9.51206	9.22515	7.81711	6.13827	6.59003	9.21971	9.264	8.50177	9.16147	9.1554	8.39119	9.61077	9.33373	9.09534	7.51023	6.17335	6.68386	9.09098	8.66631	7.65068	7.42979	9.38758	9.85582	9.99329	9.70491	9.80129	9.87109	9.87431	9.71236	9.69768	9.26621	9.92189	9.23786	9.09452	9.47841	8.83791	9.35877	9.36745
Dnmt3a	13435	1423064_at	DNA methyltransferase 3A	22	GO:0000122 (negative regulation of transcription from RNA polymerase II promoter),GO:0006306 (DNA methylation),GO:0006346 (methylation-dependent chromatin silencing),GO:0006349 (imprinting),GO:0006350 (transcription),GO:0006355 (regulation of transcription, DNA-dependent),GO:0007283 (spermatogenesis)	GO:0000791 (euchromatin),GO:0000792 (heterochromatin),GO:0005634 (nucleus),GO:0005720 (nuclear heterochromatin),GO:0005737 (cytoplasm),GO:0016363 (nuclear matrix)	GO:0003677 (DNA binding),GO:0003682 (chromatin binding),GO:0003886 (DNA (cytosine-5-)-methyltransferase activity),GO:0005515 (protein binding),GO:0008168 (methyltransferase activity),GO:0008270 (zinc ion binding),GO:0016740 (transferase activity),GO:0046872 (metal ion binding)	7.79211	7.67131	7.69658	7.35942	7.43636	7.16392	6.90411	7.16535	7.37186	7.8208	8.06617	8.04997	7.88264	7.82062	7.51879	7.58009	7.69317	7.4916	7.07363	7.09325	7.49929	7.93072	7.48535	8.05919	8.7445	7.63181	7.05676	7.14755	7.01774	6.94053	6.93616	7.00322	7.01782	6.9331	6.72488	7.10522	7.43361	7.67389	7.71571	7.54683	7.51363	7.4251
Dock1	330662	1452220_at	dedicator of cyto-kinesis 1	1	GO:0006118 (electron transport),GO:0006909 (phagocytosis),GO:0006911 (phagocytosis, engulfment),GO:0006915 (apoptosis),GO:0007165 (signal transduction),GO:0007229 (integrin-mediated signaling pathway),GO:0007264 (small GTPase mediated signal transduction),GO:0016477 (cell migration)	GO:0005737 (cytoplasm),GO:0005856 (cytoskeleton),GO:0016020 (membrane)	GO:0005085 (guanyl-nucleotide exchange factor activity),GO:0005096 (GTPase activator activity),GO:0005506 (iron ion binding),GO:0005515 (protein binding),GO:0009055 (electron carrier activity),GO:0020037 (heme binding)	7.85407	7.62341	7.5762	8.2588	7.81476	7.8495	7.67816	7.24807	6.48027	7.55211	7.81059	7.39157	7.62967	7.52632	7.62819	7.8049	8.24146	8.30383	8.04956	7.55367	6.74482	8.28225	8.19255	7.81508	6.89148	8.20207	8.04318	8.14808	8.07637	8.02182	8.30647	8.2115	8.09316	8.1218	7.88513	8.08838	8.51735	8.59596	8.46888	8.36425	8.65669	7.93655
Dock4	238130	1457146_at	dedicator of cytokinesis 4	9		GO:0016020 (membrane)	GO:0005085 (guanyl-nucleotide exchange factor activity)	4.16191	5.08608	4.72871	4.45133	4.00644	4.02811	5.03628	6.61888	7.1883	3.84543	4.71387	5.21707	3.50634	3.42421	4.99325	4.28481	5.0115	4.5175	4.3781	5.65579	6.09552	3.87473	4.90426	4.62969	4.11956	5.04218	3.80973	4.1157	3.75797	4.25826	4.4483	4.35457	4.16948	4.01284	4.05479	4.30214	3.43747	4.34475	4.31584	4.18681	4.50688	3.70848
Dock7	67299	1448892_at	dedicator of cytokinesis 7	23	GO:0007275 (multicellular organismal development),GO:0007399 (nervous system development),GO:0030154 (cell differentiation)		GO:0005085 (guanyl-nucleotide exchange factor activity),GO:0005525 (GTP binding),GO:0031072 (heat shock protein binding),GO:0051020 (GTPase binding)	8.97823	8.59381	8.53852	9.06097	8.74623	8.61768	8.19156	7.92334	7.88964	8.64257	8.63589	8.57371	8.59918	8.56326	8.06584	8.68771	8.96731	8.86425	8.47537	8.18124	7.99598	8.87861	8.72289	8.47539	8.23387	8.8895	8.64286	8.5782	8.5136	8.70354	8.66958	8.60173	8.67904	8.67863	8.59525	8.74357	7.78367	7.93473	8.45237	8.45874	7.89085	8.53321
Dpagt1	13478	1448549_a_at	dolichyl-phosphate (UDP-N-acetylglucosamine) acetylglucosaminephosphotransferase 1 (GlcNAc-1-P transferase)	5	GO:0006488 (dolichol-linked oligosaccharide biosynthetic process),GO:0006629 (lipid metabolic process)	GO:0005615 (extracellular space),GO:0005783 (endoplasmic reticulum),GO:0005789 (endoplasmic reticulum membrane),GO:0016020 (membrane),GO:0016021 (integral to membrane)	GO:0003824 (catalytic activity),GO:0003975 (UDP-N-acetylglucosamine-dolichyl-phosphate N-acetylglucosaminephosphotransferase activity),GO:0016740 (transferase activity),GO:0016757 (transferase activity, transferring glycosyl groups)	8.45588	8.26527	8.36075	8.39935	8.33974	8.21366	7.81719	7.64958	7.50367	8.36891	8.40652	8.52884	8.32778	8.24802	8.28729	8.56051	8.48197	8.42831	8.04259	7.68649	7.67346	8.36437	8.25993	7.75743	7.60452	8.62798	8.69276	8.80709	8.62218	8.80603	8.70811	8.7223	8.56691	8.48516	8.32038	8.80766	8.42579	8.61206	8.77749	8.57847	8.60474	8.86527
Dpm2	13481	1415675_at	dolichol-phosphate (beta-D) mannosyltransferase 2	22	GO:0009059 (macromolecule biosynthetic process)	GO:0005783 (endoplasmic reticulum),GO:0016020 (membrane),GO:0016021 (integral to membrane),GO:0030176 (integral to endoplasmic reticulum membrane)	GO:0005515 (protein binding),GO:0016740 (transferase activity),GO:0016757 (transferase activity, transferring glycosyl groups)	8.36934	8.19866	8.47737	8.58224	8.15592	7.96255	7.84792	8.44314	8.38337	8.26635	8.24131	8.38691	8.21376	8.03098	7.85079	8.27239	8.209	8.12925	8.22527	8.25413	8.37509	8.34122	8.26394	8.24702	8.51918	8.41284	8.33258	8.34597	8.26087	8.24142	8.18354	8.19304	8.14929	8.1801	7.79782	8.27364	8.35041	8.2904	8.34519	8.317	8.54744	8.21674
Dpy19l1	244745	1433759_at	dpy-19-like 1 (C. elegans)	29	GO:0008150 (biological_process)	GO:0005575 (cellular_component)	GO:0003674 (molecular_function)	7.6976	7.38893	7.34424	7.57883	7.25588	7.13449	7.6681	7.92556	7.71157	7.03407	7.58721	7.27268	7.47954	7.39982	7.91643	7.52045	7.69348	7.5913	7.95876	8.44631	7.95432	7.54089	8.57355	9.06329	9.01856	7.81934	7.7722	7.86912	7.49706	7.72237	7.99523	7.84202	7.96533	7.86005	7.64938	7.8751	7.56008	7.63342	7.81658	7.51242	7.58841	7.55944
Dpysl2	12934	1458188_at	Dihydropyrimidinase-like 2	11	GO:0006139 (nucleobase, nucleoside, nucleotide and nucleic acid metabolic process),GO:0007165 (signal transduction),GO:0007275 (multicellular organismal development),GO:0007399 (nervous system development),GO:0030154 (cell differentiation)	GO:0005739 (mitochondrion),GO:0030424 (axon),GO:0030425 (dendrite),GO:0043025 (cell soma)	GO:0004157 (dihydropyrimidinase activity),GO:0016787 (hydrolase activity)	4.18838	5.51495	5.38747	4.34101	3.97269	4.61061	5.36234	5.83149	4.81889	5.67249	5.77837	5.40544	4.67725	6.22414	5.57358	4.29142	4.05658	5.13545	5.22524	5.19081	4.78081	5.55609	5.4658	4.77727	4.99904	4.85397	4.08975	3.73012	4.09332	4.24601	3.86171	4.04759	4.00758	4.47368	3.953	4.07396	4.27865	4.29924	4.49932	4.92873	4.70321	4.111
Dscr2	56088	1448307_at	Down syndrome critical region homolog 2 (human)	4		GO:0005624 (membrane fraction),GO:0005887 (integral to plasma membrane)		8.3706	8.45172	8.44136	8.75274	8.31186	8.10101	7.70316	7.82304	7.58139	8.46684	8.42395	8.37574	8.38394	8.18369	8.07802	8.42985	8.75405	8.66899	8.27858	7.86203	7.75699	8.47685	8.45005	8.28106	7.79259	8.84833	8.57055	8.59909	8.24915	8.61518	8.5375	8.4589	8.42772	8.30118	8.00289	8.5277	8.19046	8.1293	8.20289	7.96844	7.94067	8.15958
Dsn1	66934	1417139_at	DSN1, MIND kinetochore complex component, homolog (S. cerevisiae)	3		GO:0005634 (nucleus)	GO:0005515 (protein binding)	7.66744	7.14037	6.68433	6.82779	7.47873	7.31169	5.94992	5.46224	5.64999	6.9713	7.21137	6.63756	6.71955	7.0326	5.58885	7.36863	6.95657	7.15632	5.67645	5.78096	5.56938	7.03654	6.12569	6.06371	5.93238	6.86906	7.76694	7.69703	7.61712	7.5012	7.54282	7.65422	7.58886	7.44289	7.48241	7.67789	7.05583	7.57419	7.62026	7.34781	7.02496	7.06155
[truncated: 1,321 more rows]
[truncated: 54 more columns]
