# Supplementary material for: Uncovering a Macrophage Transcriptional Program by Integrating Evidence from Motif Scanning and Expression Dynamics
Source: PLoS Comput Biol. 2008 Mar 21;4(3):e1000021. doi: 10.1371/journal.pcbi.1000021 (PMC2265556; doi:10.1371/journal.pcbi.1000021)
Supplement: Table S10 — Transcription factor genes with microarray expression data. This spreadsheet contains microarray probeset intensities for all 80 differentially expressed transcription factor genes (see Materials and Methods, Selection of Transcription Factors) across all 95 microarray experiments (see Table S3). Column 1 indicates the NCBI gene symbol of the gene. Column 2 indicates the NCBI Entrez Gene ID. Column 3 indicates the probeset selected as representative for the gene. Column 4 provides a brief gene description, obtained from the Affymetrix Mouse GeneChip annotations file. Column 5 indicates the co-expressed gene cluster to which the gene was assigned (see Materials and Methods, Expression Clustering). Columns 6–8 provide listings of the gene's Gene Ontology annotations in the process, component, and function GO hierarchies, respectively (see Materials and Methods, Functional Enrichment Analysis). Column 9 indicates the set of TRANSFAC matrices associated with this transcription factor gene (see Materials and Methods, Selection of Transcription Factors). Column 10 indicates the maximum log2 intensity observed, across all experiments. Columns 11–105 provide the log2 intensity measurements of the probesets, across all 95 microarray experiments. (0.21 MB XLS) [file pcbi.1000021.s028.xls]

## Sheet: Sheet1
Gene symbol	Entrez ID	Representative probeset	Gene title	GO Process	GO Component	GO Function	ATF3_CPG_0060	ATF3_CPG_0120	ATF3_CPG_0240	ATF3_LPS_0020	ATF3_LPS_0060	ATF3_LPS_0120	ATF3_LPS_0240	ATF3_LPS_0360	ATF3_LPS_0480	ATF3_PAM2_0060	ATF3_PAM2_0120	ATF3_PAM2_0240	ATF3_PIC_0060	ATF3_PIC_0120	ATF3_PIC_0240	ATF3_UNSTIM_0000	CREM_LPS_0060	CREM_LPS_0120	CREM_LPS_0240	CREM_LPS_0360	CREM_LPS_0480	CREM_PIC_0120	CREM_PIC_0240	CREM_PIC_0360	CREM_PIC_0480	CREM_UNSTIM_0000	MYD88_LPS_0020	MYD88_LPS_0060	MYD88_LPS_0120	MYD88_PAM3_0020	MYD88_PAM3_0060	MYD88_PAM3_0120	MYD88_PIC_0020	MYD88_PIC_0060	MYD88_PIC_0120	MYD88_UNSTIM_0000	TRIF_LPSPAM2_0060	TRIF_LPSPAM2_0120	TRIF_LPS_0060	TRIF_LPS_0120	TRIF_UNSTIM_0000	WT_CPG_0020	WT_CPG_0040
Ahr	11622	1422631_at	aryl-hydrocarbon receptor	GO:0000160 (two-component signal transduction system (phosphorelay)),GO:0006350 (transcription),GO:0006355 (regulation of transcription, DNA-dependent),GO:0006366 (transcription from RNA polymerase II promoter),GO:0006805 (xenobiotic metabolic process),GO:0006915 (apoptosis),GO:0006950 (response to stress),GO:0007049 (cell cycle),GO:0007165 (signal transduction),GO:0009410 (response to xenobiotic…	GO:0005634 (nucleus),GO:0005667 (transcription factor complex),GO:0005737 (cytoplasm)	GO:0000155 (two-component sensor activity),GO:0003677 (DNA binding),GO:0003700 (transcription factor activity),GO:0004871 (signal transducer activity),GO:0004872 (receptor activity),GO:0004879 (ligand-dependent nuclear receptor activity),GO:0005515 (protein binding),GO:0030528 (transcription regulator activity)	4.27937	5.01773	6.21675	3.672	3.82636	5.78419	5.36439	5.53246	5.73452	3.61645	5.22387	6.2414	3.94789	5.13408	4.6696	3.87865	5.41131	7.95597	6.49318	5.42009	5.07343	5.44403	4.40404	3.97275	3.49657	4.7319	5.01381	5.27279	6.24592	5.46226	5.2874	5.24676	5.11128	5.001	5.44966	5.35659	5.33814	6.98068	5.57932	6.74873	4.9987	5.40056	5.83712
Atf1	11908	1417296_at	activating transcription factor 1	GO:0006350 (transcription),GO:0006355 (regulation of transcription, DNA-dependent)	GO:0005634 (nucleus),GO:0005667 (transcription factor complex)	GO:0003677 (DNA binding),GO:0003700 (transcription factor activity),GO:0004869 (cysteine protease inhibitor activity),GO:0005515 (protein binding),GO:0043565 (sequence-specific DNA binding),GO:0046983 (protein dimerization activity)	9.98118	9.62214	9.51443	9.64586	9.66755	9.55193	8.506	8.65341	9.12723	9.61546	9.81534	9.55065	9.59968	9.28418	8.7825	9.83562	9.67084	9.56087	8.61007	8.7658	9.1574	9.70556	8.91019	9.09018	9.38749	9.66855	9.74472	9.81277	9.59352	9.44218	9.53977	9.51356	9.75959	9.57566	9.34344	9.63271	8.80893	9.70674	9.51335	9.39252	9.77184	9.57048	9.82304
Atf3	11910	1449363_at	activating transcription factor 3	GO:0006094 (gluconeogenesis),GO:0006350 (transcription),GO:0006355 (regulation of transcription, DNA-dependent)	GO:0005634 (nucleus),GO:0005667 (transcription factor complex)	GO:0003677 (DNA binding),GO:0003700 (transcription factor activity),GO:0003714 (transcription corepressor activity),GO:0016564 (transcriptional repressor activity),GO:0043565 (sequence-specific DNA binding),GO:0046983 (protein dimerization activity)	13.1531	13.2035	12.854	12.5414	13.3046	13.3977	12.9883	12.8267	13.0142	13.1588	13.389	13.086	12.9601	13.3226	13.0809	12.2486	11.5992	11.2536	11.3981	11.5569	11.9275	10.7524	10.8117	11.4984	11.5825	10.3406	10.6665	11.3046	11.6067	10.4682	10.5274	10.6155	10.8035	10.9763	11.9018	10.6204	11.4289	11.031	11.5257	10.8623	9.62325	10.3502	10.4301
Cbfb	12400	1460716_a_at	core binding factor beta	GO:0001503 (ossification),GO:0001649 (osteoblast differentiation),GO:0006366 (transcription from RNA polymerase II promoter),GO:0030098 (lymphocyte differentiation),GO:0030099 (myeloid cell differentiation),GO:0045944 (positive regulation of transcription from RNA polymerase II promoter),GO:0048469 (cell maturation)	GO:0005634 (nucleus)	GO:0003700 (transcription factor activity),GO:0003702 (RNA polymerase II transcription factor activity),GO:0003713 (transcription coactivator activity),GO:0005515 (protein binding)	10.8746	10.8996	10.6986	11.1152	10.8868	10.7432	10.4243	10.5007	10.4976	10.9397	10.8975	10.6547	10.9019	10.75	10.5894	10.9745	11.0472	10.9334	10.7572	10.4528	10.0827	10.7309	10.7168	10.4034	9.99664	11.0833	11.2933	11.2772	11.2654	11.2527	11.4339	11.343	11.3259	11.3656	10.9096	11.3435	11.0673	10.9733	11.1697	10.7327	11.2121	11.0614	11.0351
Cebpa	12606	1418982_at	CCAAT/enhancer binding protein (C/EBP), alpha	GO:0001892 (embryonic placenta development),GO:0006350 (transcription),GO:0006355 (regulation of transcription, DNA-dependent),GO:0007005 (mitochondrion organization and biogenesis),GO:0008285 (negative regulation of cell proliferation),GO:0019221 (cytokine and chemokine mediated signaling pathway),GO:0030099 (myeloid cell differentiation),GO:0030225 (macrophage differentiation),GO:0030324 (lung …	GO:0005634 (nucleus),GO:0005667 (transcription factor complex)	GO:0003677 (DNA binding),GO:0003700 (transcription factor activity),GO:0005515 (protein binding),GO:0008134 (transcription factor binding),GO:0042803 (protein homodimerization activity),GO:0043565 (sequence-specific DNA binding),GO:0046983 (protein dimerization activity)	7.89216	7.19062	6.92926	7.84844	7.97064	6.83715	5.15123	5.12132	5.05262	8.13514	7.72301	7.28688	8.35929	7.69329	5.23297	8.41007	8.31509	6.99131	5.1736	4.77863	4.97392	7.17358	5.26411	4.76707	6.05058	8.46147	8.66936	8.61168	7.99303	8.54427	8.7039	8.82587	8.32376	8.36569	7.51933	8.49093	8.02621	7.27943	8.45661	7.18513	7.7769	8.71413	8.52994
Cebpb	12608	1418901_at	CCAAT/enhancer binding protein (C/EBP), beta	GO:0001892 (embryonic placenta development),GO:0006350 (transcription),GO:0006355 (regulation of transcription, DNA-dependent),GO:0006366 (transcription from RNA polymerase II promoter),GO:0006916 (anti-apoptosis),GO:0006917 (induction of apoptosis),GO:0006953 (acute-phase response),GO:0006954 (inflammatory response),GO:0030182 (neuron differentiation),GO:0045408 (regulation of interleukin-6 bios…	GO:0005634 (nucleus),GO:0005737 (cytoplasm)	GO:0003677 (DNA binding),GO:0003700 (transcription factor activity),GO:0005515 (protein binding),GO:0016563 (transcriptional activator activity),GO:0042803 (protein homodimerization activity),GO:0043565 (sequence-specific DNA binding),GO:0046982 (protein heterodimerization activity),GO:0046983 (protein dimerization activity)	11.4246	11.3161	11.1941	9.22265	10.9464	10.8937	10.7954	11	11.294	11.1156	11.3946	11.4278	10.279	10.552	9.12788	9.58489	10.2552	10.5772	10.4978	10.8958	11.1273	10.2316	8.39125	9.74397	10.3287	9.40291	9.84196	10.4937	10.9021	9.64142	9.72003	9.82816	9.41178	9.5845	9.92465	9.8298	10.3504	11.2028	10.8134	11.0553	9.62319	9.91026	10.1787
Cebpd	12609	1423233_at	CCAAT/enhancer binding protein (C/EBP), delta	GO:0006350 (transcription),GO:0006355 (regulation of transcription, DNA-dependent)	GO:0005634 (nucleus)	GO:0003677 (DNA binding),GO:0003700 (transcription factor activity),GO:0005515 (protein binding),GO:0042803 (protein homodimerization activity),GO:0043565 (sequence-specific DNA binding),GO:0046982 (protein heterodimerization activity),GO:0046983 (protein dimerization activity)	9.67648	10.9722	11.6008	9.12608	9.27694	10.7268	12.2354	11.9372	11.0856	9.1165	10.9118	11.4926	8.81357	9.09262	10.109	9.23081	7.80316	9.81797	11.7912	11.5216	10.4609	8.05513	9.29048	8.61573	7.22994	8.12269	8.08015	8.26658	7.40592	8.14623	8.27553	8.21326	7.98709	7.7285	7.12412	8.24417	7.92908	8.81944	7.88051	8.8822	8.11908	7.78031	8.23267
Cebpg	12611	1451639_at	CCAAT/enhancer binding protein (C/EBP), gamma	GO:0001889 (liver development),GO:0006337 (nucleosome disassembly),GO:0006338 (chromatin remodeling),GO:0006350 (transcription),GO:0006355 (regulation of transcription, DNA-dependent),GO:0006955 (immune response),GO:0030183 (B cell differentiation),GO:0042267 (natural killer cell mediated cytotoxicity),GO:0043353 (enucleate erythrocyte differentiation),GO:0043388 (positive regulation of DNA bindi…	GO:0005634 (nucleus)	GO:0003677 (DNA binding),GO:0003700 (transcription factor activity),GO:0005515 (protein binding),GO:0008134 (transcription factor binding),GO:0042803 (protein homodimerization activity),GO:0043565 (sequence-specific DNA binding),GO:0046982 (protein heterodimerization activity),GO:0046983 (protein dimerization activity)	6.99267	6.78999	6.58997	6.59692	6.80105	6.4991	5.66299	6.34705	7.17334	6.64817	6.76003	6.64728	6.66418	6.61868	5.84278	6.6084	6.52941	6.58524	5.40622	5.89345	6.71306	6.76647	5.9202	6.11425	6.88868	6.66561	6.47441	6.40226	6.41041	6.38584	6.58058	6.32412	6.25001	6.08963	5.82574	6.40843	6.28344	6.43466	6.80338	6.59026	6.52875	6.26205	6.4548
Ddit3	13198	1417516_at	DNA-damage inducible transcript 3	GO:0000074 (regulation of progression through cell cycle),GO:0006350 (transcription),GO:0006355 (regulation of transcription, DNA-dependent),GO:0006974 (response to DNA damage stimulus),GO:0006983 (ER overload response),GO:0007049 (cell cycle),GO:0007050 (cell cycle arrest),GO:0030503 (regulation of cell redox homeostasis),GO:0030968 (unfolded protein response),GO:0042789 (mRNA transcription from…	GO:0005634 (nucleus)	GO:0003677 (DNA binding),GO:0003700 (transcription factor activity),GO:0003714 (transcription corepressor activity),GO:0005515 (protein binding),GO:0043565 (sequence-specific DNA binding),GO:0046983 (protein dimerization activity)	9.87957	9.54107	9.80494	10.4483	9.54565	8.6487	8.30256	9.56532	10.5279	9.88707	9.91508	10.0039	9.47583	8.74506	8.78363	9.95656	7.95261	8.06183	8.82103	9.07235	10.0906	9.38606	8.87311	9.41468	10.2692	8.20401	8.99822	8.73296	8.39473	8.77933	8.72928	8.76591	8.99934	8.86218	7.87744	8.81264	8.54907	8.0535	8.1668	8.12208	8.08042	8.35214	8.31986
E2f1	13555	1431875_a_at	E2F transcription factor 1	GO:0000074 (regulation of progression through cell cycle),GO:0006350 (transcription),GO:0006355 (regulation of transcription, DNA-dependent),GO:0006915 (apoptosis),GO:0007049 (cell cycle),GO:0030900 (forebrain development),GO:0045449 (regulation of transcription),GO:0045893 (positive regulation of transcription, DNA-dependent),GO:0045944 (positive regulation of transcription from RNA polymerase I…	GO:0005634 (nucleus),GO:0005667 (transcription factor complex),GO:0005737 (cytoplasm)	GO:0003677 (DNA binding),GO:0003700 (transcription factor activity),GO:0005515 (protein binding),GO:0008134 (transcription factor binding),GO:0016563 (transcriptional activator activity)	7.5556	7.21687	6.80849	7.59122	7.75284	7.30642	6.34506	5.93159	6.06235	7.1377	7.46927	7.18491	7.78395	7.69881	6.74546	7.74376	7.78498	7.56219	6.5625	6.12799	6.21993	7.53252	7.07871	6.67239	6.44592	7.91898	8.07276	7.99621	7.94924	8.01168	8.35526	8.20327	7.85458	7.77329	7.56714	7.90877	7.62088	7.443	7.48747	7.08783	7.69057	7.70465	7.6474
E2f6	50496	1448835_at	E2F transcription factor 6	GO:0000074 (regulation of progression through cell cycle),GO:0000083 (G1/S-specific transcription in mitotic cell cycle),GO:0006350 (transcription),GO:0006355 (regulation of transcription, DNA-dependent),GO:0007049 (cell cycle)	GO:0005634 (nucleus),GO:0005662 (DNA replication factor A complex),GO:0005667 (transcription factor complex)	GO:0003677 (DNA binding),GO:0003700 (transcription factor activity)	7.42361	7.26917	6.88929	7.94139	7.4473	7.06856	5.69703	5.3412	5.47154	7.16954	7.25041	6.92065	7.61782	7.42966	6.38515	7.91999	8.07287	7.63238	6.20732	5.73948	5.4104	7.8053	6.86787	5.8559	6.17425	8.3587	8.40594	8.27525	7.90446	8.34559	8.51404	8.59142	8.32728	8.29935	7.96095	8.18794	7.53654	7.43333	7.59072	7.21095	7.81516	7.711	7.75313
E2f7	52679	1437187_at	E2F transcription factor 7	GO:0000074 (regulation of progression through cell cycle),GO:0006350 (transcription),GO:0006355 (regulation of transcription, DNA-dependent),GO:0007049 (cell cycle),GO:0008285 (negative regulation of cell proliferation),GO:0045449 (regulation of transcription)	GO:0005634 (nucleus),GO:0005667 (transcription factor complex)	GO:0003677 (DNA binding),GO:0003700 (transcription factor activity),GO:0016564 (transcriptional repressor activity)	6.94789	5.64768	5.01011	6.93288	6.73881	5.67471	3.50446	3.95765	4.01391	6.52554	6.40608	6.02282	6.55687	6.2607	3.83589	6.7657	7.15598	6.6587	3.7682	4.15466	3.56442	7.0655	4.81344	3.72506	5.69812	7.11709	7.93738	8.14922	7.88732	7.86185	7.96044	8.0977	7.87602	7.87316	7.72102	7.90957	7.25886	7.37147	7.49956	6.55076	7.3825	6.70164	6.94548
Egr1	13653	1417065_at	early growth response 1	GO:0006350 (transcription),GO:0006355 (regulation of transcription, DNA-dependent),GO:0030217 (T cell differentiation),GO:0045941 (positive regulation of transcription)	GO:0005622 (intracellular),GO:0005634 (nucleus)	GO:0003676 (nucleic acid binding),GO:0003677 (DNA binding),GO:0003700 (transcription factor activity),GO:0008270 (zinc ion binding),GO:0046872 (metal ion binding)	10.82	7.84487	6.49458	11.518	12.1196	9.18998	6.31261	8.13387	7.5981	11.2994	7.95653	6.3829	11.7642	9.32621	7.13418	5.56365	11.8095	8.25784	6.63926	6.8033	6.05133	8.5005	6.18051	5.50172	5.21524	7.20437	4.41528	11.2612	10.2697	5.08985	5.01591	5.17706	4.83622	8.67542	10.8382	5.15118	11.557	6.47938	11.6055	6.25298	4.77448	4.92008	7.75229
Egr2	13654	1427683_at	early growth response 2	GO:0006350 (transcription),GO:0006355 (regulation of transcription, DNA-dependent),GO:0007420 (brain development),GO:0007422 (peripheral nervous system development),GO:0007622 (rhythmic behavior),GO:0014037 (Schwann cell differentiation),GO:0042552 (myelination),GO:0045449 (regulation of transcription)	GO:0005622 (intracellular),GO:0005634 (nucleus)	GO:0003676 (nucleic acid binding),GO:0003677 (DNA binding),GO:0003700 (transcription factor activity),GO:0005515 (protein binding),GO:0008270 (zinc ion binding),GO:0030528 (transcription regulator activity),GO:0046872 (metal ion binding)	10.352	8.72755	7.50416	8.46148	10.5482	8.72583	5.6137	5.61897	6.27091	9.71595	7.90834	7.45878	10.2126	9.36735	6.00379	6.01781	10.3785	9.33481	4.97608	5.76083	5.8568	9.46744	5.27162	5.81531	5.42787	6.7772	5.20884	8.82557	10.0035	5.13683	5.06093	5.22104	5.89025	7.0422	9.27148	5.56943	10.0185	7.49301	10.6693	8.82397	5.70391	6.55383	7.03482
Egr3	13655	1436329_at	early growth response 3	GO:0006350 (transcription),GO:0006355 (regulation of transcription, DNA-dependent),GO:0007274 (neuromuscular synaptic transmission),GO:0007422 (peripheral nervous system development),GO:0007517 (muscle development),GO:0007623 (circadian rhythm)	GO:0005622 (intracellular),GO:0005634 (nucleus)	GO:0003676 (nucleic acid binding),GO:0003677 (DNA binding),GO:0003700 (transcription factor activity),GO:0008270 (zinc ion binding),GO:0046872 (metal ion binding)	7.49049	6.69489	3.5279	4.9037	7.41468	7.49773	3.27776	2.86533	2.80917	7.07451	6.39936	3.42168	6.67716	7.83375	3.19573	3.55658	7.35114	6.99954	2.83114	2.57883	2.77473	5.03397	2.7314	2.84716	3.00973	4.78631	2.76471	5.19461	5.52756	3.41127	3.53344	4.26834	3.02822	3.39507	6.3471	3.12972	3.64224	6.22875	5.98205	6.04921	3.25245	3.40258	4.20233
Elf1	13709	1417540_at	E74-like factor 1	GO:0001817 (regulation of cytokine production),GO:0006350 (transcription),GO:0006355 (regulation of transcription, DNA-dependent),GO:0045944 (positive regulation of transcription from RNA polymerase II promoter),GO:0050860 (negative regulation of T cell receptor signaling pathway)	GO:0005634 (nucleus)	GO:0003677 (DNA binding),GO:0003700 (transcription factor activity),GO:0005515 (protein binding),GO:0016563 (transcriptional activator activity),GO:0043565 (sequence-specific DNA binding)	9.41994	8.6269	8.61007	9.24833	9.21021	8.80229	9.65218	9.42427	9.2673	8.95991	8.59771	8.27144	9.4687	8.92395	10.0121	9.26545	8.92102	8.57809	9.70434	9.41708	9.23378	8.80133	9.99717	9.68266	9.19276	8.92869	8.84087	8.87408	8.52874	8.60216	8.88285	8.78875	8.93003	8.70969	8.37223	8.82857	8.29512	7.92335	8.57425	7.55811	8.44922	8.85077	9.0305
Elk3	13713	1448797_at	ELK3, member of ETS oncogene family	GO:0000074 (regulation of progression through cell cycle),GO:0001525 (angiogenesis),GO:0006350 (transcription),GO:0006355 (regulation of transcription, DNA-dependent),GO:0006357 (regulation of transcription from RNA polymerase II promoter),GO:0007165 (signal transduction),GO:0009987 (cellular process),GO:0016481 (negative regulation of transcription),GO:0042060 (wound healing),GO:0050875 ()	GO:0005634 (nucleus)	GO:0003677 (DNA binding),GO:0003700 (transcription factor activity),GO:0003702 (RNA polymerase II transcription factor activity),GO:0003712 (transcription cofactor activity),GO:0003714 (transcription corepressor activity),GO:0032422 (purine-rich negative regulatory element binding),GO:0043565 (sequence-specific DNA binding)	8.11286	7.84925	6.93396	8.06643	8.1109	7.95893	6.1536	6.46357	6.66989	7.85608	7.77337	6.82552	7.65005	7.90945	7.26157	8.34887	9.20322	9.06631	7.32716	6.25994	6.59463	8.59153	8.62464	7.37223	6.99794	9.23834	8.59325	8.87782	8.48343	8.81277	8.54383	8.83211	8.67985	8.48948	8.48385	8.65062	8.44061	8.27204	8.46891	8.232	8.29723	8.52801	8.73381
Esrra	26379	1442864_at	estrogen related receptor, alpha	GO:0006350 (transcription),GO:0006355 (regulation of transcription, DNA-dependent),GO:0006810 (transport)	GO:0005634 (nucleus),GO:0016020 (membrane)	GO:0003677 (DNA binding),GO:0003700 (transcription factor activity),GO:0003707 (steroid hormone receptor activity),GO:0004872 (receptor activity),GO:0004879 (ligand-dependent nuclear receptor activity),GO:0005215 (transporter activity),GO:0005496 (steroid binding),GO:0005515 (protein binding),GO:0008270 (zinc ion binding),GO:0016439 (tRNA-pseudouridine synthase activity),GO:0043565 (sequence-spec…	5.60108	5.99184	6.60147	5.24121	5.3518	5.53261	5.74563	5.98578	6.13279	5.72687	5.86768	6.75154	5.2277	5.34079	5.28839	5.44649	5.71463	5.80186	5.69146	6.13681	6.24658	5.63643	5.41094	5.36498	6.06646	5.66145	4.90075	5.10373	5.33168	5.29614	5.61082	5.51478	4.7146	5.28761	4.7576	5.31591	5.69466	5.16694	5.33383	5.72264	5.77944	5.23164	5.2881
Fli1	14247	1433512_at	Friend leukemia integration 1	GO:0006350 (transcription),GO:0006355 (regulation of transcription, DNA-dependent),GO:0007599 (hemostasis),GO:0008015 (circulation),GO:0009887 (organ morphogenesis),GO:0009987 (cellular process),GO:0050875 ()	GO:0005634 (nucleus)	GO:0003677 (DNA binding),GO:0003700 (transcription factor activity),GO:0016563 (transcriptional activator activity),GO:0043565 (sequence-specific DNA binding)	9.16274	8.72731	6.85249	8.96706	9.3351	8.85449	6.61405	5.52141	6.05399	9.06405	8.62997	7.12714	9.45876	9.077	6.79258	9.63238	9.04434	8.65061	6.1219	5.59125	6.42841	9.2007	7.56267	7.05179	7.44528	9.01863	9.06725	9.0099	8.70939	8.96139	8.8793	9.29356	9.2497	8.97989	8.70533	9.16905	8.62927	9.36775	9.12345	8.48472	9.52464	9.24255	9.44534
Fos	14281	1423100_at	FBJ osteosarcoma oncogene	GO:0000074 (regulation of progression through cell cycle),GO:0006306 (DNA methylation),GO:0006355 (regulation of transcription, DNA-dependent),GO:0006357 (regulation of transcription from RNA polymerase II promoter),GO:0006954 (inflammatory response),GO:0007155 (cell adhesion),GO:0007399 (nervous system development),GO:0008285 (negative regulation of cell proliferation),GO:0009987 (cellular proce…	GO:0005634 (nucleus),GO:0005667 (transcription factor complex),GO:0005887 (integral to plasma membrane),GO:0016020 (membrane),GO:0016021 (integral to membrane),GO:0016023 (cytoplasmic membrane-bound vesicle)	GO:0003677 (DNA binding),GO:0003700 (transcription factor activity),GO:0003704 (specific RNA polymerase II transcription factor activity),GO:0005178 (integrin binding),GO:0008201 (heparin binding),GO:0043565 (sequence-specific DNA binding),GO:0046983 (protein dimerization activity)	9.22593	6.36143	6.96619	11.0876	11.8498	8.84899	8.16799	9.41497	8.70571	8.02142	6.14721	6.55044	11.221	8.62296	8.574	7.72687	12.1276	8.82612	9.16825	9.73897	9.37339	9.53699	10.5497	10.4479	10.7777	11.346	9.3995	12.0866	10.4994	9.84455	10.2684	10.3045	9.52177	11.1141	11.3296	9.5856	9.35737	6.49931	10.7184	5.67368	7.71011	8.61704	10.0414
Foxm1	14235	1448834_at	forkhead box M1	GO:0001558 (regulation of cell growth),GO:0001570 (vasculogenesis),GO:0001889 (liver development),GO:0006350 (transcription),GO:0006355 (regulation of transcription, DNA-dependent),GO:0007049 (cell cycle),GO:0007275 (multicellular organismal development),GO:0008284 (positive regulation of cell proliferation),GO:0042127 (regulation of cell proliferation),GO:0045944 (positive regulation of transcri…	GO:0005634 (nucleus),GO:0005667 (transcription factor complex)	GO:0003677 (DNA binding),GO:0003700 (transcription factor activity),GO:0005515 (protein binding),GO:0043565 (sequence-specific DNA binding)	6.76854	6.48232	6.14198	6.90917	6.98989	6.60811	5.68229	5.1569	4.99257	6.84778	6.87197	6.23436	6.82054	6.48384	5.86801	7.07458	6.47852	6.4799	5.7637	5.01396	5.55119	6.30679	6.1497	5.82126	5.64916	6.73571	7.72877	7.909	7.56086	7.61791	7.63	7.67441	7.56276	7.42313	7.1556	7.62111	7.44531	7.2424	7.1751	7.33994	7.19932	7.25337	7.32079
Foxo3a	56484	1434832_at	forkhead box O3a	GO:0001542 (ovulation (sensu Mammalia)),GO:0001544 (initiation of primordial ovarian follicle growth),GO:0001547 (antral ovarian follicle growth),GO:0001556 (oocyte maturation),GO:0006350 (transcription),GO:0006355 (regulation of transcription, DNA-dependent),GO:0006810 (transport),GO:0006917 (induction of apoptosis),GO:0006974 (response to DNA damage stimulus),GO:0007275 (multicellular organisma…	GO:0005624 (membrane fraction),GO:0005634 (nucleus),GO:0005737 (cytoplasm),GO:0016020 (membrane)	GO:0003677 (DNA binding),GO:0003700 (transcription factor activity),GO:0005351 (sugar porter activity),GO:0005355 (glucose transporter activity),GO:0016563 (transcriptional activator activity),GO:0043565 (sequence-specific DNA binding)	7.81011	6.69386	6.26915	7.73959	7.84586	6.78394	5.21509	5.70043	6.38253	7.68056	6.85636	6.33983	8.11482	7.6966	5.37563	8.12602	7.10771	6.08156	4.34827	4.91118	5.26345	7.17976	5.07899	5.23098	5.85306	7.3152	7.31158	7.25619	6.67053	7.34879	7.60985	7.59169	7.71713	7.43569	7.05082	7.65515	7.56202	7.25895	7.79657	6.62215	7.87591	7.75266	8.01576
Foxp1	108655	1421141_a_at	forkhead box P1	GO:0000122 (negative regulation of transcription from RNA polymerase II promoter),GO:0006350 (transcription),GO:0006355 (regulation of transcription, DNA-dependent),GO:0007275 (multicellular organismal development),GO:0007507 (heart development),GO:0016481 (negative regulation of transcription),GO:0055007 (cardiac muscle cell differentiation)	GO:0005622 (intracellular),GO:0005634 (nucleus)	GO:0003676 (nucleic acid binding),GO:0003677 (DNA binding),GO:0003700 (transcription factor activity),GO:0005515 (protein binding),GO:0008270 (zinc ion binding),GO:0016564 (transcriptional repressor activity),GO:0042803 (protein homodimerization activity),GO:0043565 (sequence-specific DNA binding),GO:0046872 (metal ion binding),GO:0046982 (protein heterodimerization activity)	7.32564	8.38757	9.08584	6.3191	7.26403	8.90701	9.21473	8.38808	8.59656	6.29882	8.44136	8.60019	6.65013	7.00621	6.74272	7.24501	7.18443	7.7914	8.13199	8.28192	8.42262	7.21627	6.64506	5.61669	5.69491	7.22135	7.30863	7.39678	7.39497	7.4432	7.43715	7.33121	7.90899	7.68949	7.60305	7.62637	5.4836	7.38238	6.19511	7.27069	6.03342	7.38331	7.56333
Gabpa	14390	1450664_at	GA repeat binding protein, alpha	GO:0006350 (transcription),GO:0006355 (regulation of transcription, DNA-dependent),GO:0006357 (regulation of transcription from RNA polymerase II promoter)	GO:0005634 (nucleus)	GO:0003677 (DNA binding),GO:0003700 (transcription factor activity),GO:0043565 (sequence-specific DNA binding)	8.32763	8.06982	7.98308	7.96084	8.04052	8.17807	7.57687	6.68859	6.62073	7.83028	8.20077	7.98144	7.82653	7.73518	7.52825	8.11329	7.85831	7.90731	7.43973	6.95314	6.5937	7.63739	7.66432	7.12392	6.79214	7.73017	7.66646	7.89776	7.79907	7.71388	7.57459	7.81437	7.70626	7.65789	7.71195	7.75311	7.95555	8.04959	7.96772	8.02081	7.80101	7.83542	8.04898
Hif1a	15251	1457231_at	Hypoxia inducible factor 1, alpha subunit	GO:0000160 (two-component signal transduction system (phosphorelay)),GO:0001525 (angiogenesis),GO:0001666 (response to hypoxia),GO:0001755 (neural crest cell migration),GO:0001947 (heart looping),GO:0006118 (electron transport),GO:0006350 (transcription),GO:0006355 (regulation of transcription, DNA-dependent),GO:0007165 (signal transduction),GO:0030154 (cell differentiation),GO:0030949 (positive …	GO:0005634 (nucleus),GO:0009434 (microtubule-based flagellum)	GO:0000155 (two-component sensor activity),GO:0003677 (DNA binding),GO:0003700 (transcription factor activity),GO:0003705 (RNA polymerase II transcription factor activity, enhancer binding),GO:0004497 (monooxygenase activity),GO:0004871 (signal transducer activity),GO:0005506 (iron ion binding),GO:0005515 (protein binding),GO:0020037 (heme binding),GO:0030528 (transcription regulator activity),GO…	6.11965	6.20321	6.40457	5.52039	5.39159	4.96505	5.61693	7.11064	7.44832	5.8091	6.27462	6.31626	5.01174	5.03336	6.38637	5.16554	7.28535	6.27739	5.85429	6.78155	7.2384	5.86979	6.93265	6.97467	6.19752	5.79807	4.47856	4.79292	4.73238	4.83423	4.89568	4.76781	4.45585	4.96762	4.60686	4.60718	5.12162	5.20562	6.24455	5.61378	5.11984	4.65454	4.8389
Hmga2	15364	1422851_at	high mobility group AT-hook 2	GO:0006323 (DNA packaging),GO:0006350 (transcription),GO:0006355 (regulation of transcription, DNA-dependent),GO:0007001 (chromosome organization and biogenesis (sensu Eukaryota))	GO:0000228 (nuclear chromosome),GO:0000785 (chromatin),GO:0005634 (nucleus),GO:0005694 (chromosome)	GO:0003677 (DNA binding),GO:0005515 (protein binding)	10.1623	10.6999	9.0942	10.6452	10.2714	10.0024	9.58911	9.13468	8.7845	11.3043	10.791	9.4695	11.5625	11.3838	10.8931	10.2731	11.6613	11.3945	10.0985	9.27662	8.90189	10.9344	10.2364	10.0327	10.352	11.6525	10.9105	10.7854	10.9213	10.6136	10.7385	10.6718	10.5579	10.5331	10.0569	10.4268	11.3314	11.806	11.4847	11.2097	11.3264	10.2607	10.4056
Hoxa4	15401	1441070_at	Homeo box A4	GO:0001974 (blood vessel remodeling),GO:0006350 (transcription),GO:0006355 (regulation of transcription, DNA-dependent),GO:0007275 (multicellular organismal development),GO:0007389 (pattern specification process),GO:0008284 (positive regulation of cell proliferation),GO:0009653 (anatomical structure morphogenesis),GO:0009887 (organ morphogenesis),GO:0010159 (specification of organ position),GO:00…	GO:0005634 (nucleus),GO:0005667 (transcription factor complex)	GO:0003677 (DNA binding),GO:0003700 (transcription factor activity),GO:0043565 (sequence-specific DNA binding)	5.1874	5.31681	5.36988	5.54312	5.36297	5.25357	5.41699	5.25989	5.40487	5.35325	5.21047	5.40475	5.4051	5.39006	5.21127	5.31841	5.38888	5.49542	5.4046	5.39144	5.51077	5.3757	5.465	5.22218	5.7211	5.55246	5.53616	5.53316	5.53442	5.49916	5.35182	5.45466	5.33798	5.31367	5.14478	5.33078	5.40342	5.77907	5.53554	5.34958	5.77359	5.35532	5.59197
Ikzf1	22778	1436312_at	IKAROS family zinc finger 1	GO:0006350 (transcription),GO:0006355 (regulation of transcription, DNA-dependent),GO:0016481 (negative regulation of transcription),GO:0030097 (hemopoiesis),GO:0030900 (forebrain development),GO:0040018 (positive regulation of body size),GO:0045941 (positive regulation of transcription),GO:0045944 (positive regulation of transcription from RNA polymerase II promoter),GO:0048732 (gland developmen…	GO:0005622 (intracellular),GO:0005634 (nucleus),GO:0005667 (transcription factor complex),GO:0005721 (centric heterochromatin)	GO:0003676 (nucleic acid binding),GO:0003677 (DNA binding),GO:0003700 (transcription factor activity),GO:0005515 (protein binding),GO:0008270 (zinc ion binding),GO:0016564 (transcriptional repressor activity),GO:0046872 (metal ion binding)	8.98946	9.93626	10.5767	8.92572	8.80467	9.50129	11.5642	10.7905	10.3547	8.7392	9.398	10.3396	8.80616	8.97485	11.6764	8.99833	9.13013	9.38896	11.2572	10.9243	10.4532	8.83205	11.0899	10.7318	9.68232	9.10127	8.59944	8.78699	8.52313	8.825	8.84855	8.99532	8.92889	8.8573	8.51827	8.74669	7.84277	8.0216	8.3392	8.53457	8.20878	8.53667	8.68494
Irf1	16362	1448436_a_at	interferon regulatory factor 1	GO:0006350 (transcription),GO:0006355 (regulation of transcription, DNA-dependent),GO:0006366 (transcription from RNA polymerase II promoter),GO:0006955 (immune response),GO:0045084 (positive regulation of interleukin-12 biosynthetic process),GO:0045893 (positive regulation of transcription, DNA-dependent)	GO:0005634 (nucleus)	GO:0003677 (DNA binding),GO:0003700 (transcription factor activity)	12.0291	11.4913	11.4771	9.59883	11.7589	11.967	11.6169	11.016	11.1442	11.9025	11.2973	11.2186	11.7971	12.4836	12.5889	8.25116	11.1635	11.7719	11.7598	11.0071	11.1732	11.8524	12.3108	11.6078	11.3955	9.00857	8.27332	10.1335	11.2709	8.25245	8.20617	8.12218	8.21798	9.25288	10.2137	8.26926	11.1365	10.1827	11.3856	11.2754	8.18047	8.42997	8.75871
Irf2	16363	1447527_at	Interferon regulatory factor 2	GO:0000122 (negative regulation of transcription from RNA polymerase II promoter),GO:0006350 (transcription),GO:0006355 (regulation of transcription, DNA-dependent),GO:0006955 (immune response),GO:0008283 (cell proliferation)	GO:0005634 (nucleus)	GO:0003677 (DNA binding),GO:0003700 (transcription factor activity),GO:0003702 (RNA polymerase II transcription factor activity)	5.20272	6.27258	6.95369	5.2184	4.30272	7.09188	7.98969	8.56979	7.59223	6.57304	6.69494	6.86409	5.34919	8.10637	8.22039	5.31297	5.59847	8.0789	8.66158	8.6415	8.12294	8.79874	9.22402	8.96109	9.2579	7.62402	4.21443	3.68637	4.4063	3.87682	4.56926	4.53101	4.42393	4.81855	4.65713	4.38889	4.77803	5.47391	4.75773	6.09781	5.43761	4.27872	4.80445
Irf3	54131	1416898_a_at	interferon regulatory factor 3	GO:0006350 (transcription),GO:0006355 (regulation of transcription, DNA-dependent),GO:0006366 (transcription from RNA polymerase II promoter),GO:0009615 (response to virus),GO:0031663 (lipopolysaccharide-mediated signaling pathway),GO:0032496 (response to lipopolysaccharide),GO:0043330 (response to exogenous dsRNA),GO:0045351 (interferon type I biosynthetic process)	GO:0005622 (intracellular),GO:0005634 (nucleus)	GO:0003677 (DNA binding),GO:0003700 (transcription factor activity),GO:0003702 (RNA polymerase II transcription factor activity),GO:0003712 (transcription cofactor activity),GO:0042803 (protein homodimerization activity)	7.22487	6.94217	7.23936	6.90344	7.12463	7.19967	6.86982	7.03773	6.99257	6.72639	6.94974	7.05457	6.95803	6.85397	6.86015	6.83782	7.2946	7.19111	7.40179	7.16921	7.14348	7.21693	7.00408	7.01197	6.99848	7.23947	7.10014	7.34726	7.50532	7.26467	7.35758	7.08939	6.96305	6.88804	6.82813	7.04031	7.18677	7.19377	7.05692	7.04145	6.89719	6.74711	6.7418
Irf5	27056	1460231_at	interferon regulatory factor 5	GO:0006350 (transcription),GO:0006355 (regulation of transcription, DNA-dependent)	GO:0005622 (intracellular),GO:0005634 (nucleus)	GO:0003677 (DNA binding),GO:0003700 (transcription factor activity)	8.94084	9.326	8.79284	8.50575	8.64198	9.5244	10.0913	10.0792	10.0954	8.85594	9.44961	9.00302	8.54539	9.3987	10.3423	8.43344	9.83769	9.82713	10.0493	9.77379	10.0852	9.48407	10.4293	10.3407	10.6127	9.84559	8.79353	8.94036	9.00475	8.91769	9.034	9.02056	8.54086	8.57836	8.5074	8.79327	8.46093	8.79565	8.40666	8.94318	8.09921	8.96817	9.01078
Irf7	54123	1417244_a_at	interferon regulatory factor 7	GO:0006350 (transcription),GO:0006355 (regulation of transcription, DNA-dependent),GO:0006955 (immune response),GO:0009615 (response to virus),GO:0016064 (immunoglobulin mediated immune response),GO:0045351 (interferon type I biosynthetic process)	GO:0005622 (intracellular),GO:0005634 (nucleus)	GO:0003677 (DNA binding),GO:0003700 (transcription factor activity),GO:0005515 (protein binding)	8.94909	8.77353	9.06576	9.02977	8.78881	9.4649	11.3426	11.9043	12.1037	9.12396	9.00413	9.40098	8.53764	9.1179	11.086	9.0628	9.38961	10.1345	11.6041	12.1145	12.3166	10.581	11.6342	12.0048	12.3245	9.44887	9.15466	9.2185	9.08266	9.16864	9.29663	9.26831	8.34248	8.43047	8.28394	8.7391	6.73175	6.19493	6.08561	6.1282	5.84387	8.32346	8.18285
Isgf3g	16391	1421322_a_at	interferon dependent positive acting transcription factor 3 gamma	GO:0006350 (transcription),GO:0006355 (regulation of transcription, DNA-dependent),GO:0006955 (immune response),GO:0045351 (interferon type I biosynthetic process)	GO:0005622 (intracellular),GO:0005634 (nucleus),GO:0005667 (transcription factor complex)	GO:0003677 (DNA binding),GO:0003700 (transcription factor activity),GO:0005515 (protein binding)	8.4187	8.25439	8.40022	8.22133	8.30197	8.61091	9.12533	9.14214	9.0062	8.37692	8.17653	8.16886	8.23255	8.58134	9.11155	8.52815	8.25968	8.5878	8.99366	8.9469	9.06719	8.73086	9.22651	8.89893	8.71289	8.43406	8.41428	8.38126	8.42681	8.3472	8.41907	8.51016	8.20855	8.00431	7.85982	8.37824	7.04889	6.96092	7.47498	6.98945	7.33929	8.22832	8.51692
Jun	16476	1417409_at	Jun oncogene	GO:0000074 (regulation of progression through cell cycle),GO:0006350 (transcription),GO:0006355 (regulation of transcription, DNA-dependent),GO:0009987 (cellular process),GO:0035026 (leading edge cell differentiation),GO:0045944 (positive regulation of transcription from RNA polymerase II promoter),GO:0050875 ()	GO:0000228 (nuclear chromosome),GO:0005622 (intracellular),GO:0005634 (nucleus),GO:0005667 (transcription factor complex)	GO:0003677 (DNA binding),GO:0003700 (transcription factor activity),GO:0003702 (RNA polymerase II transcription factor activity),GO:0005515 (protein binding),GO:0043565 (sequence-specific DNA binding),GO:0046983 (protein dimerization activity)	10.6565	8.00883	8.95638	10.5947	11.5783	9.25684	10.5899	9.75226	9.329	10.4791	7.99988	8.30866	11.1042	9.92863	9.83563	10.4467	10.2286	7.64033	9.46874	9.331	8.84105	8.89359	9.00155	8.57828	8.45484	9.01226	9.38975	10.4271	9.32192	9.0781	9.36881	9.33602	9.39478	9.63608	9.26402	9.61002	10.5727	7.3733	10.7569	6.23879	8.84874	9.41491	10.1733
Junb	16477	1415899_at	Jun-B oncogene	GO:0000074 (regulation of progression through cell cycle),GO:0006334 (nucleosome assembly),GO:0006350 (transcription),GO:0006355 (regulation of transcription, DNA-dependent),GO:0006357 (regulation of transcription from RNA polymerase II promoter),GO:0007001 (chromosome organization and biogenesis (sensu Eukaryota)),GO:0009987 (cellular process),GO:0050875 ()	GO:0000785 (chromatin),GO:0000786 (nucleosome),GO:0005622 (intracellular),GO:0005634 (nucleus),GO:0005694 (chromosome)	GO:0003677 (DNA binding),GO:0003700 (transcription factor activity),GO:0003702 (RNA polymerase II transcription factor activity),GO:0003713 (transcription coactivator activity),GO:0003714 (transcription corepressor activity),GO:0043565 (sequence-specific DNA binding),GO:0046983 (protein dimerization activity)	10.9297	10.0865	9.94713	8.65749	11.4963	10.341	10.1541	9.50793	9.65646	10.6815	10.1688	9.77249	10.9952	10.0085	9.78779	6.53952	10.4983	9.64062	9.14382	9.16018	9.1938	9.01373	8.64465	8.59996	9.07862	7.96809	7.04378	10.4745	10.9531	7.15879	7.41488	7.72386	7.12142	8.37453	10.0377	7.10514	10.4911	9.48994	10.1993	9.32326	6.76066	7.38411	8.6809
Lmo2	16909	1454086_a_at	LIM domain only 2	GO:0007275 (multicellular organismal development),GO:0045647 (negative regulation of erythrocyte differentiation)	GO:0005634 (nucleus),GO:0043234 (protein complex)	GO:0005515 (protein binding),GO:0008270 (zinc ion binding),GO:0046872 (metal ion binding)	10.8857	10.4491	9.61651	10.9007	10.7988	10.228	9.44477	9.02879	8.73953	10.9146	10.6767	9.83122	11.1753	10.8663	10.1563	11.155	9.4414	9.21322	9.19756	9.08649	9.18381	9.85878	9.9447	10.3176	10.1614	9.67125	10.0487	9.98936	9.60226	10.03	10.0709	10.0143	10.0368	10.0132	9.52178	10.1725	9.69687	9.15445	9.97272	9.24764	9.5841	10.6381	10.7213
Maf	17132	1444073_at	avian musculoaponeurotic fibrosarcoma (v-maf) AS42 oncogene homolog	GO:0000074 (regulation of progression through cell cycle),GO:0001816 (cytokine production),GO:0006350 (transcription),GO:0006355 (regulation of transcription, DNA-dependent),GO:0006366 (transcription from RNA polymerase II promoter),GO:0009987 (cellular process),GO:0045449 (regulation of transcription),GO:0045944 (positive regulation of transcription from RNA polymerase II promoter),GO:0050875 ()	GO:0000785 (chromatin),GO:0005634 (nucleus),GO:0005737 (cytoplasm)	GO:0003677 (DNA binding),GO:0003700 (transcription factor activity),GO:0003702 (RNA polymerase II transcription factor activity),GO:0005515 (protein binding),GO:0043565 (sequence-specific DNA binding),GO:0046983 (protein dimerization activity)	5.80694	6.18165	6.61164	6.71354	4.74145	5.29227	7.09954	7.77751	7.18434	5.5993	6.01539	6.19001	4.95883	4.99453	6.48577	6.91486	4.75679	5.83277	8.69737	8.61086	8.14286	6.45118	7.73941	8.19906	8.13889	7.12978	5.77228	4.66313	4.23626	5.90303	6.0372	5.98773	5.93047	5.40461	4.5568	5.83731	4.28205	4.85354	4.84413	4.75326	5.90975	6.11685	5.83614
Mafb	16658	1451716_at	v-maf musculoaponeurotic fibrosarcoma oncogene family, protein B (avian)	GO:0006350 (transcription),GO:0006355 (regulation of transcription, DNA-dependent),GO:0006357 (regulation of transcription from RNA polymerase II promoter),GO:0007379 (segment specification),GO:0007423 (sensory organ development),GO:0007585 (respiratory gaseous exchange),GO:0042472 (inner ear morphogenesis),GO:0045647 (negative regulation of erythrocyte differentiation),GO:0045944 (positive regul…	GO:0005634 (nucleus),GO:0005667 (transcription factor complex)	GO:0003677 (DNA binding),GO:0003700 (transcription factor activity),GO:0005515 (protein binding),GO:0008134 (transcription factor binding),GO:0043565 (sequence-specific DNA binding),GO:0046983 (protein dimerization activity)	8.25755	6.51059	6.31115	8.52135	8.03146	6.54258	6.08916	7.8445	8.02912	8.25579	6.84054	6.12347	8.36774	7.02229	5.72648	8.74801	8.55803	7.122	6.06268	7.90757	8.32508	8.27802	6.07896	8.31237	8.65879	9.08997	9.52966	9.31685	8.24385	9.40842	9.53097	9.45449	9.48616	9.34979	8.20924	9.60094	8.41737	6.76179	8.84322	6.5191	8.45929	9.45852	9.39564
Maff	17133	1418936_at	v-maf musculoaponeurotic fibrosarcoma oncogene family, protein F (avian)	GO:0000074 (regulation of progression through cell cycle),GO:0001701 (in utero embryonic development),GO:0006350 (transcription),GO:0006355 (regulation of transcription, DNA-dependent),GO:0006366 (transcription from RNA polymerase II promoter),GO:0007567 (parturition),GO:0045604 (regulation of epidermal cell differentiation)	GO:0005622 (intracellular),GO:0005634 (nucleus)	GO:0003677 (DNA binding),GO:0003700 (transcription factor activity),GO:0043565 (sequence-specific DNA binding),GO:0046983 (protein dimerization activity)	9.84767	8.83147	8.98965	5.99838	9.43782	9.45924	7.48089	5.81538	5.98759	8.74645	8.3958	9.1293	8.16232	8.70702	6.59421	5.02742	8.96109	8.94489	6.77345	5.48795	5.5079	8.4404	6.13407	5.54665	5.30259	5.91533	5.47033	7.32035	8.6031	5.57907	5.86895	5.33556	5.18594	5.76498	8.42147	5.29593	7.87053	7.26567	8.14345	7.56158	5.61006	5.4556	5.60218
Mafg	17134	1448916_at	v-maf musculoaponeurotic fibrosarcoma oncogene family, protein G (avian)	GO:0001701 (in utero embryonic development),GO:0006350 (transcription),GO:0006355 (regulation of transcription, DNA-dependent),GO:0006366 (transcription from RNA polymerase II promoter),GO:0030534 (adult behavior),GO:0042127 (regulation of cell proliferation),GO:0045604 (regulation of epidermal cell differentiation)	GO:0000785 (chromatin),GO:0005622 (intracellular),GO:0005634 (nucleus)	GO:0003677 (DNA binding),GO:0003700 (transcription factor activity),GO:0043565 (sequence-specific DNA binding),GO:0046983 (protein dimerization activity)	8.80949	8.45297	8.86911	8.67827	8.51419	8.20106	7.13664	7.643	8.38562	8.31197	8.61896	9.0599	8.11086	7.80047	6.69473	8.46062	8.68338	8.0942	6.53369	7.08707	7.81917	7.99436	6.70153	6.37144	7.27	8.72214	8.53611	8.47599	8.40704	8.49717	8.66355	8.64718	8.00533	8.01859	7.97728	8.40604	8.12997	8.29213	8.41848	8.29045	8.10614	8.38111	8.27103
Mef2a	17258	1427185_at	myocyte enhancer factor 2A	GO:0006350 (transcription),GO:0006355 (regulation of transcription, DNA-dependent),GO:0006366 (transcription from RNA polymerase II promoter),GO:0007275 (multicellular organismal development),GO:0007399 (nervous system development),GO:0007517 (muscle development),GO:0030154 (cell differentiation),GO:0045941 (positive regulation of transcription)	GO:0005634 (nucleus)	GO:0003677 (DNA binding),GO:0003700 (transcription factor activity),GO:0003713 (transcription coactivator activity),GO:0005515 (protein binding),GO:0016563 (transcriptional activator activity),GO:0043565 (sequence-specific DNA binding)	10.7671	10.6333	10.7537	10.8915	10.6556	10.9077	10.4642	9.8425	9.82129	10.4241	10.6006	10.8261	10.5272	10.513	9.76675	10.7707	11.5593	11.0541	9.70784	9.46741	9.46863	10.9503	9.77104	9.96528	9.71638	11.452	10.8324	10.8331	10.8297	10.8971	11.0037	11.0958	10.8458	10.8304	10.6039	10.7338	10.2697	9.95091	10.4792	10.2561	10.1537	10.708	10.7486
Mef2c	17260	1424852_at	myocyte enhancer factor 2C	GO:0006350 (transcription),GO:0006355 (regulation of transcription, DNA-dependent),GO:0006366 (transcription from RNA polymerase II promoter),GO:0007399 (nervous system development),GO:0007517 (muscle development)	GO:0005634 (nucleus)	GO:0003677 (DNA binding),GO:0003700 (transcription factor activity),GO:0003702 (RNA polymerase II transcription factor activity),GO:0003713 (transcription coactivator activity),GO:0005515 (protein binding),GO:0016563 (transcriptional activator activity),GO:0043565 (sequence-specific DNA binding)	8.98678	8.52504	7.30676	9.32449	8.88015	8.60541	6.91499	6.17902	5.81663	8.63334	8.41699	7.57034	8.85565	8.5708	7.26889	9.0778	9.14309	8.68252	6.85394	6.46976	5.98382	8.87246	7.8458	7.60276	7.24189	9.15983	8.94817	8.96861	8.76826	9.10525	9.38346	9.24956	9.2769	9.37261	8.97987	9.00245	8.32939	8.00196	8.8928	8.28229	8.64877	8.87836	9.04595
Mitf	17342	1455214_at	microphthalmia-associated transcription factor	GO:0001747 (),GO:0006350 (transcription),GO:0006355 (regulation of transcription, DNA-dependent),GO:0007275 (multicellular organismal development),GO:0007605 (sensory perception of sound),GO:0016055 (Wnt receptor signaling pathway),GO:0030154 (cell differentiation),GO:0030318 (melanocyte differentiation),GO:0042127 (regulation of cell proliferation),GO:0042981 (regulation of apoptosis),GO:0043010…	GO:0005634 (nucleus)	GO:0003677 (DNA binding),GO:0003682 (chromatin binding),GO:0003700 (transcription factor activity),GO:0003705 (RNA polymerase II transcription factor activity, enhancer binding),GO:0016563 (transcriptional activator activity),GO:0030528 (transcription regulator activity)	9.40954	9.90378	10.1783	9.68341	9.24949	10.0224	10.2754	10.3621	10.6516	9.47447	9.89307	10.0904	9.52366	9.93736	10.1051	9.26024	10.0879	10.2269	10.8147	10.6579	10.8336	9.76253	10.659	10.054	10.3795	10.0858	9.49809	9.53668	9.69556	9.63685	9.65564	9.5316	9.81816	9.7918	9.62778	9.65955	9.08173	9.51458	9.2627	9.68657	8.65794	9.75969	9.74696
Mtf1	17764	1428979_at	metal response element binding transcription factor 1	GO:0006350 (transcription),GO:0006355 (regulation of transcription, DNA-dependent),GO:0006357 (regulation of transcription from RNA polymerase II promoter),GO:0006979 (response to oxidative stress),GO:0010038 (response to metal ion),GO:0045944 (positive regulation of transcription from RNA polymerase II promoter),GO:0046686 (response to cadmium ion)	GO:0005622 (intracellular),GO:0005634 (nucleus)	GO:0003676 (nucleic acid binding),GO:0003677 (DNA binding),GO:0003700 (transcription factor activity),GO:0003713 (transcription coactivator activity),GO:0008270 (zinc ion binding),GO:0042156 (zinc-mediated transcriptional activator activity),GO:0046872 (metal ion binding)	7.11574	7.10532	7.35277	7.07188	6.86282	6.73248	6.90139	7.38976	7.47399	6.83723	7.05062	7.3579	7.04359	6.65145	7.2814	6.61658	6.88271	6.82744	7.23805	7.16551	7.18976	6.85777	7.11527	7.34313	7.3186	6.93083	6.45456	6.77935	6.56529	6.36852	6.35795	6.23887	6.51097	6.04928	6.07025	6.55047	6.3459	6.67455	6.81646	6.6009	6.41655	6.57798	6.54024
Mxd1	17119	1455104_at	MAX dimerization protein 1	GO:0006350 (transcription),GO:0006355 (regulation of transcription, DNA-dependent),GO:0007275 (multicellular organismal development),GO:0008283 (cell proliferation),GO:0045449 (regulation of transcription)	GO:0005634 (nucleus),GO:0005667 (transcription factor complex)	GO:0003677 (DNA binding),GO:0003700 (transcription factor activity),GO:0003714 (transcription corepressor activity),GO:0005515 (protein binding),GO:0030528 (transcription regulator activity)	8.59851	7.8436	6.74833	5.72596	7.94604	8.4265	8.54377	9.76152	10.1895	7.60845	7.54512	6.80637	7.04869	7.91326	9.20712	6.04297	6.31235	7.22129	8.62264	9.38575	9.81207	7.08865	8.61368	9.78132	9.35653	5.16149	5.3837	6.22171	6.97141	5.91029	5.64497	5.40681	5.58923	5.62882	6.13257	5.67868	6.74848	6.57962	7.03355	6.77915	4.87487	6.18548	6.24837
Mxd4	17122	1434378_a_at	Max dimerization protein 4	GO:0000122 (negative regulation of transcription from RNA polymerase II promoter),GO:0006350 (transcription),GO:0006355 (regulation of transcription, DNA-dependent),GO:0008285 (negative regulation of cell proliferation),GO:0045449 (regulation of transcription)	GO:0005634 (nucleus),GO:0005667 (transcription factor complex)	GO:0003677 (DNA binding),GO:0003700 (transcription factor activity),GO:0003714 (transcription corepressor activity),GO:0005515 (protein binding),GO:0030528 (transcription regulator activity)	7.78148	7.42606	6.84184	7.37055	7.23001	6.8678	5.3604	5.50484	5.67508	7.47971	7.58186	7.0405	7.90267	7.763	6.13406	7.45718	7.31812	7.13655	5.86515	5.46372	5.23296	7.8651	6.71746	5.72904	6.34983	7.40813	7.20793	7.35962	7.0247	7.05606	7.38874	7.32493	7.3244	7.49602	6.87529	7.55169	7.13846	6.59231	7.38405	7.07508	6.97212	7.98657	8.17651
Myc	17869	1424942_a_at	myelocytomatosis oncogene	GO:0000074 (regulation of progression through cell cycle),GO:0001836 (release of cytochrome c from mitochondria),GO:0006309 (DNA fragmentation during apoptosis),GO:0006350 (transcription),GO:0006355 (regulation of transcription, DNA-dependent),GO:0006357 (regulation of transcription from RNA polymerase II promoter),GO:0006879 (iron ion homeostasis),GO:0006919 (caspase activation),GO:0007050 (cell…	GO:0005634 (nucleus),GO:0005819 (spindle),GO:0016604 (nuclear body)	GO:0003677 (DNA binding),GO:0003700 (transcription factor activity),GO:0005515 (protein binding),GO:0030528 (transcription regulator activity)	7.76716	7.08971	7.33775	7.55622	8.38179	7.25313	6.31958	5.60809	6.19336	6.85612	7.00084	7.24192	7.4162	6.32564	5.45843	7.38883	8.95061	7.30186	5.8064	5.66314	5.47741	6.77406	4.97768	5.49283	5.23943	8.03009	7.23243	8.1321	8.16123	7.76233	7.96369	7.9623	7.39206	7.59656	8.15943	7.14368	7.83334	6.35757	8.24138	6.94124	6.07682	6.66234	7.08059
Nfatc1	18018	1428479_at	nuclear factor of activated T-cells, cytoplasmic, calcineurin-dependent 1	GO:0000082 (G1/S transition of mitotic cell cycle),GO:0001837 (epithelial to mesenchymal transition),GO:0006350 (transcription),GO:0006355 (regulation of transcription, DNA-dependent),GO:0006816 (calcium ion transport),GO:0007507 (heart development),GO:0045449 (regulation of transcription)	GO:0005634 (nucleus),GO:0005737 (cytoplasm)	GO:0003677 (DNA binding),GO:0003700 (transcription factor activity)	7.69732	6.72561	5.67931	8.36749	7.89301	7.02301	5.44305	6.24544	6.19442	7.55201	6.68884	5.91409	7.54397	7.41351	6.25831	8.06695	7.50188	6.82688	5.87294	6.16452	5.96636	7.38937	6.89289	6.99119	7.02704	7.48932	7.70601	7.92686	7.25378	7.99329	7.96088	8.01082	7.90612	7.81746	7.42618	7.79692	7.31497	6.86459	7.68052	6.73552	7.31533	7.68573	7.81418
Nfatc2	18019	1439205_at	nuclear factor of activated T-cells, cytoplasmic, calcineurin-dependent 2	GO:0001816 (cytokine production),GO:0006350 (transcription),GO:0006355 (regulation of transcription, DNA-dependent),GO:0045449 (regulation of transcription),GO:0045941 (positive regulation of transcription)	GO:0005634 (nucleus),GO:0005737 (cytoplasm)	GO:0003677 (DNA binding),GO:0003700 (transcription factor activity),GO:0005515 (protein binding),GO:0016563 (transcriptional activator activity)	8.46204	8.08747	6.8292	8.70639	8.49802	7.93783	6.06023	5.78603	6.51824	8.35885	8.03494	7.70613	8.35591	8.27957	6.88648	8.61648	9.26778	8.73457	6.6403	5.85461	6.59721	8.95759	7.0659	6.52772	7.78729	9.04892	8.57248	8.87349	8.58824	8.83036	8.95697	9.30237	8.93665	8.93488	8.58367	8.93605	8.21852	7.46782	8.02748	7.43318	7.8736	8.70906	8.85062
Nfatc3	18021	1452497_a_at	nuclear factor of activated T-cells, cytoplasmic, calcineurin-dependent 3	GO:0006350 (transcription),GO:0006355 (regulation of transcription, DNA-dependent),GO:0006357 (regulation of transcription from RNA polymerase II promoter),GO:0006954 (inflammatory response),GO:0007507 (heart development),GO:0045333 (cellular respiration),GO:0045449 (regulation of transcription)	GO:0005634 (nucleus),GO:0005737 (cytoplasm)	GO:0003677 (DNA binding),GO:0003700 (transcription factor activity),GO:0003713 (transcription coactivator activity),GO:0005515 (protein binding)	5.47784	6.93603	6.91224	6.25623	5.93774	5.6081	5.8643	5.86393	5.97443	7.22211	7.22023	6.52942	6.98985	6.80386	5.87551	6.18586	6.03839	5.54128	4.99334	5.13195	4.95847	5.38115	5.27209	4.53808	4.84422	6.33065	6.07893	5.76988	5.66552	6.02324	6.23764	6.4288	5.89699	5.76614	5.05826	6.17942	6.26688	6.3513	6.11862	6.28695	6.48023	6.01391	6.44786
Nfe2l1	18023	1416331_a_at	nuclear factor, erythroid derived 2,-like 1	GO:0006355 (regulation of transcription, DNA-dependent),GO:0006366 (transcription from RNA polymerase II promoter),GO:0006783 (heme biosynthetic process),GO:0006954 (inflammatory response),GO:0009653 (anatomical structure morphogenesis)	GO:0005615 (extracellular space),GO:0005634 (nucleus)	GO:0003677 (DNA binding),GO:0003700 (transcription factor activity),GO:0003712 (transcription cofactor activity),GO:0005515 (protein binding),GO:0043565 (sequence-specific DNA binding),GO:0046983 (protein dimerization activity)	9.32337	9.37911	9.85615	8.58422	8.77307	8.84166	8.66992	8.32839	8.55731	9.03905	9.54404	10.0145	8.81357	8.99648	9.07574	8.8222	8.05799	8.43054	8.28854	8.24054	8.37533	8.35672	8.18018	8.17898	8.44535	8.13439	8.4246	8.52358	8.62895	8.21017	8.40723	8.37236	8.32141	8.33635	8.03824	8.41551	8.93839	9.51132	9.09176	9.0395	8.72295	8.42018	8.4146
Nfe2l2	18024	1457117_at	nuclear factor, erythroid derived 2, like 2	GO:0006350 (transcription),GO:0006355 (regulation of transcription, DNA-dependent),GO:0006366 (transcription from RNA polymerase II promoter),GO:0030968 (unfolded protein response),GO:0045449 (regulation of transcription),GO:0045893 (positive regulation of transcription, DNA-dependent),GO:0045941 (positive regulation of transcription),GO:0045995 (regulation of embryonic development)	GO:0005634 (nucleus),GO:0005737 (cytoplasm)	GO:0003677 (DNA binding),GO:0003700 (transcription factor activity),GO:0005515 (protein binding),GO:0016563 (transcriptional activator activity),GO:0030528 (transcription regulator activity),GO:0043565 (sequence-specific DNA binding),GO:0046983 (protein dimerization activity)	8.46283	7.62977	7.86317	7.47219	7.92725	7.57821	5.62592	5.22945	5.089	7.27003	7.30698	7.8196	7.04528	6.36901	5.38943	6.06438	6.60703	6.0215	4.78309	4.29393	3.97043	5.16471	4.22588	3.56305	4	5.16903	5.77156	7.12137	6.715	6.28561	6.16	6.50834	6.47898	6.61472	7.2281	6.05593	6.48992	6.59827	7.22478	7.01438	5.37958	6.495	7.03149
Nfic	18029	1435527_at	nuclear factor I/C	GO:0006260 (DNA replication),GO:0006350 (transcription),GO:0006355 (regulation of transcription, DNA-dependent),GO:0006366 (transcription from RNA polymerase II promoter),GO:0042475 (odontogenesis (sensu Vertebrata))	GO:0005622 (intracellular),GO:0005634 (nucleus)	GO:0003677 (DNA binding),GO:0003700 (transcription factor activity)	8.16409	7.85883	7.1444	8.49238	8.40997	7.9188	7.14072	7.07844	7.37444	8.38199	8.19146	7.92669	8.08849	7.97246	6.9392	8.50807	9.36645	8.71213	7.21098	7.23358	7.32956	8.75075	7.6784	7.74359	8.59513	9.694	8.94709	8.71348	8.73352	9.11544	9.16691	9.19546	8.81714	8.79639	8.35661	8.84365	8.50847	7.97058	8.33895	7.96512	8.07378	8.82557	8.72696
Nfkb1	18033	1427705_a_at	nuclear factor of kappa light chain gene enhancer in B-cells 1, p105	GO:0006350 (transcription),GO:0006355 (regulation of transcription, DNA-dependent),GO:0006366 (transcription from RNA polymerase II promoter),GO:0006915 (apoptosis),GO:0006916 (anti-apoptosis),GO:0006954 (inflammatory response),GO:0007165 (signal transduction),GO:0019733 (antibacterial humoral response (sensu Vertebrata)),GO:0045083 (negative regulation of interleukin-12 biosynthetic process),GO:…	GO:0005634 (nucleus),GO:0005737 (cytoplasm)	GO:0003677 (DNA binding),GO:0003700 (transcription factor activity),GO:0005515 (protein binding),GO:0016566 (specific transcriptional repressor activity)	10.0164	10.9342	11.549	9.64104	9.67484	11.01	11.5907	11.555	11.1344	10.0287	10.8471	11.6053	9.25086	10.3901	11.1511	9.18869	9.79169	11.0394	11.5679	11.2767	10.7963	10.0692	10.8943	10.7212	10.3045	9.66415	9.36073	9.43802	9.90166	9.35502	9.60242	9.45389	9.34028	9.49098	9.60538	9.44981	8.9529	9.41522	9.20504	10.0906	8.47889	9.2334	9.24731
Nfyc	18046	1448963_at	nuclear transcription factor-Y gamma	GO:0006350 (transcription),GO:0006355 (regulation of transcription, DNA-dependent),GO:0045893 (positive regulation of transcription, DNA-dependent)	GO:0005622 (intracellular),GO:0005634 (nucleus),GO:0005667 (transcription factor complex)	GO:0003677 (DNA binding),GO:0003700 (transcription factor activity),GO:0005515 (protein binding),GO:0043565 (sequence-specific DNA binding)	8.52212	8.32612	8.25822	8.37366	8.41216	8.31401	7.67221	7.67397	7.79487	8.56488	8.45271	8.59254	8.34673	8.29976	7.63013	8.40828	8.55078	8.4443	7.85595	7.90271	8.07771	8.35649	7.9191	7.80954	7.75612	8.43825	8.46934	8.56921	8.4585	8.16961	8.39979	8.38022	8.28063	8.29313	8.02473	8.50873	8.37218	8.15667	8.52261	8.01143	8.31491	8.38549	8.56783
Nr1h3	22259	1450444_a_at	nuclear receptor subfamily 1, group H, member 3	GO:0006118 (electron transport),GO:0006350 (transcription),GO:0006355 (regulation of transcription, DNA-dependent),GO:0016481 (negative regulation of transcription),GO:0044255 (cellular lipid metabolic process)	GO:0005634 (nucleus)	GO:0003677 (DNA binding),GO:0003700 (transcription factor activity),GO:0003707 (steroid hormone receptor activity),GO:0003713 (transcription coactivator activity),GO:0004872 (receptor activity),GO:0004879 (ligand-dependent nuclear receptor activity),GO:0004884 (ecdysteroid hormone receptor activity),GO:0005496 (steroid binding),GO:0005507 (copper ion binding),GO:0005515 (protein binding),GO:00082…	5.86196	6.16136	6.83601	5.45045	5.65967	5.5942	5.91376	6.28787	6.79696	5.54535	6.28594	6.84438	5.71267	5.91559	6.48346	5.59105	5.95951	6.0419	6.04351	6.41425	7.22459	6.32356	7.0009	7.31333	7.93857	6.27356	5.94599	5.85388	6.07791	5.68651	5.53455	5.8788	5.84091	5.73214	5.60369	5.97185	5.9881	6.10231	5.86948	6.3683	5.63633	5.95528	6.15919
Nr3c1	14815	1421867_at	nuclear receptor subfamily 3, group C, member 1	GO:0006350 (transcription),GO:0006355 (regulation of transcription, DNA-dependent),GO:0042921 (glucocorticoid receptor signaling pathway)	GO:0005634 (nucleus)	GO:0003677 (DNA binding),GO:0003700 (transcription factor activity),GO:0003707 (steroid hormone receptor activity),GO:0004872 (receptor activity),GO:0004879 (ligand-dependent nuclear receptor activity),GO:0004883 (glucocorticoid receptor activity),GO:0005496 (steroid binding),GO:0005515 (protein binding),GO:0008270 (zinc ion binding),GO:0008289 (lipid binding),GO:0043565 (sequence-specific DNA bi…	9.14515	9.61696	9.81173	9.67464	9.11147	9.46829	10.5161	10.8134	10.799	9.49479	9.34741	9.465	9.70841	9.91915	10.6426	9.15551	9.47176	9.89069	10.4297	10.6686	10.7151	9.52134	10.3711	10.36	10.2672	9.23503	8.76741	9.0183	9.11483	9.00818	9.03237	8.98424	9.0856	9.19659	8.96641	8.92591	8.65248	8.63414	9.2192	8.9432	8.71931	9.03174	9.07867
Pou2f2	18987	1427725_a_at	POU domain, class 2, transcription factor 2	GO:0006350 (transcription),GO:0006355 (regulation of transcription, DNA-dependent),GO:0006366 (transcription from RNA polymerase II promoter),GO:0006959 (humoral immune response),GO:0045449 (regulation of transcription),GO:0045941 (positive regulation of transcription),GO:0048305 (immunoglobulin secretion),GO:0048469 (cell maturation)	GO:0005634 (nucleus)	GO:0003677 (DNA binding),GO:0003700 (transcription factor activity),GO:0043565 (sequence-specific DNA binding)	4.92912	5.21128	5.92333	5.16542	5.12635	5.08121	6.28116	7.22883	7.2995	5.32526	6.32459	6.9874	5.05628	5.08023	4.96899	5.08944	5.32578	5.54005	6.65995	7.70796	7.74492	5.41946	5.477	5.96037	6.53913	5.68895	4.96464	4.94319	5.16342	5.23613	5.13429	4.68542	5.09816	5.49056	5.03641	5.1292	5.41795	4.83763	4.81415	5.20035	4.81122	5.02499	4.91777
Pou3f1	18991	1422068_at	POU domain, class 3, transcription factor 1	GO:0006350 (transcription),GO:0006355 (regulation of transcription, DNA-dependent),GO:0042552 (myelination),GO:0045449 (regulation of transcription)	GO:0005634 (nucleus)	GO:0003677 (DNA binding),GO:0003700 (transcription factor activity),GO:0043565 (sequence-specific DNA binding)	4.88829	4.96139	4.9895	4.76195	4.96845	5.08019	6.10291	6.51082	6.15058	4.68421	5.08992	4.68302	4.83362	5.46174	6.72518	4.75157	4.90118	5.10512	7.40834	7.21422	7.05086	5.59539	8.14532	8.25363	8.06586	4.78228	4.96578	4.94194	5.12847	4.9564	5.03552	4.69986	5.02124	5.17386	5.31734	4.97052	5.46711	4.92603	4.87061	5.05356	4.86429	4.74508	4.67192
Pparg	19016	1420715_a_at	peroxisome proliferator activated receptor gamma	GO:0000122 (negative regulation of transcription from RNA polymerase II promoter),GO:0006091 (generation of precursor metabolites and energy),GO:0006350 (transcription),GO:0006355 (regulation of transcription, DNA-dependent),GO:0006357 (regulation of transcription from RNA polymerase II promoter),GO:0006629 (lipid metabolic process),GO:0006954 (inflammatory response),GO:0007165 (signal transducti…	GO:0005634 (nucleus),GO:0005829 (cytosol),GO:0017053 (transcriptional repressor complex)	GO:0003677 (DNA binding),GO:0003700 (transcription factor activity),GO:0003707 (steroid hormone receptor activity),GO:0004872 (receptor activity),GO:0004879 (ligand-dependent nuclear receptor activity),GO:0005515 (protein binding),GO:0008270 (zinc ion binding),GO:0016563 (transcriptional activator activity),GO:0016564 (transcriptional repressor activity),GO:0043565 (sequence-specific DNA binding)…	8.49548	7.9313	7.74269	8.06397	8.13969	7.66972	6.23551	6.46466	6.86504	8.38125	8.49988	8.02848	8.79662	8.33455	6.37938	8.03908	8.9156	8.3014	7.56025	7.56736	7.79621	8.90468	7.92411	8.25967	8.80348	8.77853	7.75183	8.12617	7.59114	7.45352	7.34424	7.38878	7.58883	7.68928	7.46746	7.49818	7.59567	7.23419	7.81167	7.09212	7.38018	7.92115	8.06038
Rel	19696	1420710_at	reticuloendotheliosis oncogene	GO:0000074 (regulation of progression through cell cycle),GO:0001816 (cytokine production),GO:0006350 (transcription),GO:0006355 (regulation of transcription, DNA-dependent),GO:0006366 (transcription from RNA polymerase II promoter),GO:0009987 (cellular process),GO:0043123 (positive regulation of I-kappaB kinase/NF-kappaB cascade),GO:0045084 (positive regulation of interleukin-12 biosynthetic pro…	GO:0005622 (intracellular),GO:0005634 (nucleus)	GO:0003677 (DNA binding),GO:0003700 (transcription factor activity),GO:0004871 (signal transducer activity),GO:0005515 (protein binding)	8.91647	9.23989	8.75188	5.75476	8.34429	10.2549	9.41383	9.0398	8.58975	8.09557	9.00377	8.61044	6.94008	8.87032	8.77485	5.69716	7.92511	9.62856	9.51656	9.09058	8.44264	8.09283	8.48526	8.12724	7.38387	5.92102	5.78015	6.34501	8.08964	5.62931	5.48225	5.70994	5.8965	5.62711	7.61953	5.74513	7.04543	7.95164	7.17872	8.57185	5.5733	5.7556	5.82789
Rest	19712	1425565_at	RE1-silencing transcription factor	GO:0006350 (transcription),GO:0006355 (regulation of transcription, DNA-dependent),GO:0045892 (negative regulation of transcription, DNA-dependent)	GO:0005622 (intracellular),GO:0005634 (nucleus),GO:0017053 (transcriptional repressor complex)	GO:0003676 (nucleic acid binding),GO:0003677 (DNA binding),GO:0003682 (chromatin binding),GO:0005515 (protein binding),GO:0008270 (zinc ion binding),GO:0016564 (transcriptional repressor activity),GO:0046872 (metal ion binding)	7.02864	9.10083	8.85491	6.7272	7.08812	7.342	7.44645	7.85805	8.24399	8.65773	9.38501	9.08146	7.67165	8.28995	7.91519	6.97884	7.00856	6.97971	5.90435	6.64749	7.35048	6.60469	6.62068	5.90921	7.15552	7.20587	6.40898	6.08797	6.52994	6.61125	6.50665	6.98585	6.82926	6.48437	5.9989	6.69901	6.9593	7.43468	6.80363	7.48522	6.70084	6.77005	7.0064
Rfx5	53970	1423103_at	regulatory factor X, 5 (influences HLA class II expression)	GO:0006350 (transcription),GO:0006355 (regulation of transcription, DNA-dependent)	GO:0005634 (nucleus)	GO:0003677 (DNA binding)	7.37792	7.24308	7.2311	7.21471	6.92553	6.8759	7.39918	7.49225	7.79691	7.10846	7.14692	6.97323	7.09788	7.44831	7.99319	7.00231	7.20284	7.61262	7.96684	7.9476	8.20606	7.87882	8.53358	8.6918	8.39892	7.10158	6.80687	6.91438	7.16346	7.12631	6.96547	6.95582	6.92514	6.80108	7.10356	7.00155	6.83066	7.06843	7.45949	7.12167	7.11436	7.00812	7.05568
Rfxap	170767	1418859_at	regulatory factor X-associated protein		GO:0005634 (nucleus)	GO:0003677 (DNA binding),GO:0016563 (transcriptional activator activity)	7.07705	6.96221	7.04283	7.01928	6.75115	6.5343	6.08383	6.42657	6.42646	7.09228	7.49662	7.12227	7.35821	7.09718	6.5179	7.06264	7.27696	6.73724	6.4983	6.32723	6.42889	7.03715	6.62992	6.31296	6.2257	7.39497	6.95797	7.03846	6.66153	6.81631	7.24331	6.88489	6.77124	6.91956	6.4016	7.0791	6.62078	6.37365	6.71542	6.50998	6.36603	7.05379	7.21096
Rxra	20181	1454773_at	retinoid X receptor alpha	GO:0006350 (transcription),GO:0006355 (regulation of transcription, DNA-dependent),GO:0006766 (vitamin metabolic process),GO:0007165 (signal transduction),GO:0045944 (positive regulation of transcription from RNA polymerase II promoter)	GO:0005634 (nucleus)	GO:0003677 (DNA binding),GO:0003700 (transcription factor activity),GO:0003706 (ligand-regulated transcription factor activity),GO:0003707 (steroid hormone receptor activity),GO:0003713 (transcription coactivator activity),GO:0004872 (receptor activity),GO:0004879 (ligand-dependent nuclear receptor activity),GO:0004886 (retinoid-X receptor activity),GO:0005496 (steroid binding),GO:0005515 (protei…	6.48723	6.35803	5.93482	6.37099	6.37422	6.01982	5.52125	4.64802	5.85292	6.46808	6.30755	6.19265	6.4654	6.40795	5.90184	6.43368	6.74157	6.2895	5.74416	4.88794	5.47224	6.34061	5.42711	5.30628	4.77207	6.63611	6.42754	6.6332	6.41365	6.6348	6.95345	6.51582	6.4997	6.53814	6.39826	6.80053	6.85113	5.93289	6.41856	6.21982	6.25452	6.65275	6.83751
Sfpi1	20375	1418747_at	SFFV proviral integration 1	GO:0000122 (negative regulation of transcription from RNA polymerase II promoter),GO:0006350 (transcription),GO:0006355 (regulation of transcription, DNA-dependent),GO:0030098 (lymphocyte differentiation),GO:0030225 (macrophage differentiation),GO:0030851 (granulocyte differentiation),GO:0045893 (positive regulation of transcription, DNA-dependent)	GO:0005634 (nucleus),GO:0005667 (transcription factor complex)	GO:0003677 (DNA binding),GO:0003700 (transcription factor activity),GO:0003723 (RNA binding),GO:0005515 (protein binding),GO:0016563 (transcriptional activator activity),GO:0043565 (sequence-specific DNA binding)	10.1466	10.5353	11.252	9.8279	10.2215	10.6331	11.0423	10.9986	11.0746	10.5065	11.0777	11.7314	9.97926	10.1026	10.3091	10.1241	10.4076	10.6559	10.909	11.0067	11.096	10.348	10.3971	10.4629	10.9956	10.575	10.2459	10.3899	10.2846	10.2519	10.3842	10.3552	9.87503	9.82706	9.51856	10.2623	9.89926	10.0367	9.74738	10.2406	9.36501	10.4199	10.3961
Smad1	17125	1448208_at	MAD homolog 1 (Drosophila)	GO:0000165 (MAPKKK cascade),GO:0006350 (transcription),GO:0006355 (regulation of transcription, DNA-dependent),GO:0006357 (regulation of transcription from RNA polymerase II promoter),GO:0006954 (inflammatory response),GO:0007165 (signal transduction),GO:0007179 (transforming growth factor beta receptor signaling pathway),GO:0007182 (common-partner SMAD protein phosphorylation),GO:0007183 (SMAD p…	GO:0005622 (intracellular),GO:0005634 (nucleus),GO:0005667 (transcription factor complex),GO:0016021 (integral to membrane)	GO:0003700 (transcription factor activity),GO:0003702 (RNA polymerase II transcription factor activity),GO:0005057 (receptor signaling protein activity),GO:0005515 (protein binding),GO:0016563 (transcriptional activator activity)	8.635	8.07393	7.86656	8.27858	8.32118	8.17833	6.85553	7.76526	8.20734	8.19203	8.02904	8.08942	8.4861	8.22569	6.90003	8.49882	8.26587	7.8147	6.3581	7.22089	7.88374	8.156	7.43189	7.61221	7.77156	8.08362	8.37777	8.55857	8.12266	8.50621	8.33966	8.71949	8.6314	8.50651	8.34287	8.47432	7.32637	7.70155	8.27746	7.55025	7.9126	8.16304	8.51671
Sp1	20683	1454852_at	trans-acting transcription factor 1	GO:0006350 (transcription),GO:0006355 (regulation of transcription, DNA-dependent),GO:0045817 (positive regulation of global transcription from RNA polymerase II promoter),GO:0045893 (positive regulation of transcription, DNA-dependent)	GO:0005622 (intracellular),GO:0005634 (nucleus)	GO:0003676 (nucleic acid binding),GO:0003677 (DNA binding),GO:0003690 (double-stranded DNA binding),GO:0003700 (transcription factor activity),GO:0003702 (RNA polymerase II transcription factor activity),GO:0005515 (protein binding),GO:0008022 (protein C-terminus binding),GO:0008270 (zinc ion binding),GO:0016563 (transcriptional activator activity),GO:0042803 (protein homodimerization activity),G…	9.33105	9.36594	9.49061	9.50246	9.2208	9.14922	8.30877	8.46572	8.7242	9.36714	9.54733	9.40999	9.49941	9.37915	8.76684	9.42046	9.43049	9.26807	8.35284	8.27812	8.62398	9.30106	8.59553	8.28888	8.81542	9.48566	9.28467	9.49415	9.23859	9.36442	9.57044	9.57194	9.46887	9.46383	9.07638	9.44874	9.56196	9.56278	9.71296	9.44543	9.73605	9.43363	9.45099
Srebf1	20787	1426690_a_at	sterol regulatory element binding factor 1	GO:0006350 (transcription),GO:0006355 (regulation of transcription, DNA-dependent),GO:0006629 (lipid metabolic process),GO:0008202 (steroid metabolic process),GO:0008203 (cholesterol metabolic process),GO:0009267 (cellular response to starvation),GO:0045449 (regulation of transcription)	GO:0005634 (nucleus),GO:0005783 (endoplasmic reticulum),GO:0016020 (membrane),GO:0016021 (integral to membrane)	GO:0003677 (DNA binding),GO:0003700 (transcription factor activity),GO:0030528 (transcription regulator activity),GO:0032810 (sterol response element binding)	9.58467	9.15312	8.97078	9.26205	9.47386	9.40356	8.62141	8.25244	8.48172	9.74809	9.66254	9.42046	9.34387	9.35063	8.60791	9.34541	9.03029	9.13873	8.66841	8.45873	8.73138	8.94419	8.74109	8.7858	8.98453	9.09302	9.17706	9.28116	9.28268	9.03474	9.07306	9.04079	8.84096	8.89889	8.68033	9.45932	9.42435	9.12155	8.96403	8.83502	8.82748	9.40081	9.622
Stat1	20846	1420915_at	signal transducer and activator of transcription 1	GO:0000074 (regulation of progression through cell cycle),GO:0006350 (transcription),GO:0006355 (regulation of transcription, DNA-dependent),GO:0006366 (transcription from RNA polymerase II promoter),GO:0006919 (caspase activation),GO:0007165 (signal transduction),GO:0007242 (intracellular signaling cascade),GO:0007249 (I-kappaB kinase/NF-kappaB cascade),GO:0007260 (tyrosine phosphorylation of ST…	GO:0005634 (nucleus),GO:0005737 (cytoplasm)	GO:0003677 (DNA binding),GO:0003700 (transcription factor activity),GO:0004871 (signal transducer activity),GO:0005062 (hematopoietin/interferon-class (D200-domain) cytokine receptor signal transducer activity),GO:0005509 (calcium ion binding),GO:0005515 (protein binding)	8.2155	7.66463	7.79875	8.25979	7.83736	8.02636	9.32648	10.1686	10.4598	8.01743	7.69103	7.857	7.7028	7.95798	9.32229	7.97958	8.80042	8.70388	9.5626	10.2034	10.3615	8.59767	10.0905	10.5487	10.626	8.8227	8.09014	8.17291	7.74845	8.12542	8.11988	8.25088	7.94009	7.82211	7.51485	8.15145	7.4322	7.24431	7.36577	7.0372	7.4736	7.81939	7.8479
Stat3	20848	1426587_a_at	signal transducer and activator of transcription 3	GO:0001659 (thermoregulation),GO:0001754 (eye photoreceptor cell differentiation),GO:0006350 (transcription),GO:0006355 (regulation of transcription, DNA-dependent),GO:0006357 (regulation of transcription from RNA polymerase II promoter),GO:0006366 (transcription from RNA polymerase II promoter),GO:0006953 (acute-phase response),GO:0007165 (signal transduction),GO:0007242 (intracellular signaling…	GO:0005634 (nucleus),GO:0005737 (cytoplasm),GO:0005886 (plasma membrane)	GO:0003677 (DNA binding),GO:0003700 (transcription factor activity),GO:0004871 (signal transducer activity),GO:0005509 (calcium ion binding),GO:0005515 (protein binding),GO:0008134 (transcription factor binding),GO:0016563 (transcriptional activator activity),GO:0046983 (protein dimerization activity)	8.84494	9.7339	10.1724	8.63435	9.24855	9.3068	11.1421	11.198	11.2429	9.51864	9.66029	9.58068	9.58973	9.92262	11.4194	9.01726	8.6934	8.68792	10.4934	10.8936	11.0519	8.69683	9.86676	9.89512	10.2923	8.74592	9.00231	8.85638	8.98897	9.05625	9.22496	9.0771	8.7811	8.90599	8.49978	8.99737	9.37971	9.00761	8.91228	8.86016	8.85352	9.24645	9.33411
Stat4	20849	1448713_at	signal transducer and activator of transcription 4	GO:0006350 (transcription),GO:0006355 (regulation of transcription, DNA-dependent),GO:0006357 (regulation of transcription from RNA polymerase II promoter),GO:0007165 (signal transduction),GO:0007242 (intracellular signaling cascade),GO:0007259 (JAK-STAT cascade),GO:0008283 (cell proliferation),GO:0019221 (cytokine and chemokine mediated signaling pathway)	GO:0005634 (nucleus)	GO:0003677 (DNA binding),GO:0003700 (transcription factor activity),GO:0004871 (signal transducer activity),GO:0005509 (calcium ion binding)	6.53702	6.26626	5.6452	7.29245	6.61422	6.62392	6.26783	5.37376	5.51619	6.22678	6.40828	5.85139	6.11428	6.14948	6.08307	6.58326	5.21287	5.87162	6.07936	5.90175	5.96572	6.13551	6.08502	6.13799	5.5481	5.32819	5.94969	6.03081	5.75379	5.64627	6.04789	5.68369	5.83448	5.54598	5.70487	6.03488	5.2011	4.77453	5.36289	5.07681	4.99822	5.83843	5.80578
Stat5a	20850	1421469_a_at	signal transducer and activator of transcription 5A	GO:0001553 (luteinization),GO:0001779 (natural killer cell differentiation),GO:0006350 (transcription),GO:0006355 (regulation of transcription, DNA-dependent),GO:0006357 (regulation of transcription from RNA polymerase II promoter),GO:0006955 (immune response),GO:0007165 (signal transduction),GO:0007242 (intracellular signaling cascade),GO:0007259 (JAK-STAT cascade),GO:0007565 (pregnancy),GO:0007…	GO:0005634 (nucleus),GO:0005737 (cytoplasm)	GO:0003677 (DNA binding),GO:0003700 (transcription factor activity),GO:0004871 (signal transducer activity),GO:0005509 (calcium ion binding),GO:0005515 (protein binding)	7.60838	8.24399	9.08281	7.02364	6.82288	8.35543	9.84777	9.25683	8.9217	7.31416	8.29674	8.58667	6.83953	7.32265	8.92134	6.893	7.16126	9.09088	10.6309	9.54542	8.84508	7.02494	7.87356	7.30538	7.12189	7.14384	6.81516	7.12772	6.72431	6.57622	6.58144	6.50635	6.62456	6.30175	6.1209	6.83591	6.54633	6.97535	7.03852	8.28243	6.59947	6.98132	6.91752
Tcf12	21406	1421908_a_at	transcription factor 12	GO:0006350 (transcription),GO:0006355 (regulation of transcription, DNA-dependent),GO:0006357 (regulation of transcription from RNA polymerase II promoter),GO:0007275 (multicellular organismal development),GO:0045449 (regulation of transcription)	GO:0005634 (nucleus),GO:0005667 (transcription factor complex)	GO:0003677 (DNA binding),GO:0005515 (protein binding),GO:0016563 (transcriptional activator activity),GO:0030528 (transcription regulator activity)	8.99271	8.66035	8.06982	9.30897	9.34876	8.95525	7.98906	6.98546	7.18134	8.87067	8.65267	7.26723	9.08305	8.78114	7.78984	9.53769	8.12002	8.14301	7.28896	7.24738	6.76481	8.14257	7.5362	6.74029	6.5749	8.11018	8.70862	8.49312	8.49278	8.51819	8.55028	8.39083	8.57038	8.66191	8.09191	8.64873	8.77947	8.69883	9.15048	8.6451	8.82465	8.93226	9.08382
Tcfe2a	21423	1426297_at	transcription factor E2a	GO:0006350 (transcription),GO:0006355 (regulation of transcription, DNA-dependent),GO:0045449 (regulation of transcription)	GO:0005634 (nucleus),GO:0005667 (transcription factor complex)	GO:0003677 (DNA binding),GO:0003700 (transcription factor activity),GO:0005515 (protein binding),GO:0030528 (transcription regulator activity),GO:0042803 (protein homodimerization activity),GO:0046982 (protein heterodimerization activity)	6.88714	6.51422	6.48053	6.36026	6.74131	6.63741	5.72874	5.37943	5.11929	6.25828	6.71867	6.85776	6.46309	6.66531	6.18648	6.91862	6.71897	6.4616	5.71729	5.53231	5.53664	6.55622	6.40437	5.8957	5.94159	6.84978	6.96802	6.91948	6.72202	6.84785	6.99919	7.12582	6.89797	6.7411	6.30079	6.84358	6.49331	6.26917	6.3954	5.8826	5.95686	6.70347	6.6787
Tgif1	21815	1422286_a_at	TG interacting factor	GO:0000122 (negative regulation of transcription from RNA polymerase II promoter),GO:0006350 (transcription),GO:0006355 (regulation of transcription, DNA-dependent),GO:0007275 (multicellular organismal development),GO:0045449 (regulation of transcription)	GO:0005634 (nucleus),GO:0005667 (transcription factor complex)	GO:0003677 (DNA binding),GO:0003700 (transcription factor activity),GO:0003714 (transcription corepressor activity),GO:0008432 (JUN kinase binding),GO:0043565 (sequence-specific DNA binding)	10.1222	8.16831	8.272	8.4666	10.1893	8.93606	7.54383	8.36522	8.86794	9.29663	8.10473	7.5971	10.0677	9.44463	7.79148	8.56056	9.52442	8.52706	7.57476	8.48046	8.94539	9.19054	8.07972	8.03066	8.62054	8.57572	8.42922	9.18625	9.61466	8.50024	8.39134	8.75968	8.41116	8.75939	9.5352	8.33709	8.85383	7.66407	9.31491	8.14734	7.22283	8.3808	8.68194
Trp53	22059	1427739_a_at	transformation related protein 53	GO:0000060 (protein import into nucleus, translocation),GO:0000074 (regulation of progression through cell cycle),GO:0001701 (in utero embryonic development),GO:0006284 (base-excision repair),GO:0006289 (nucleotide-excision repair),GO:0006350 (transcription),GO:0006355 (regulation of transcription, DNA-dependent),GO:0006461 (protein complex assembly),GO:0006915 (apoptosis),GO:0006917 (induction o…	GO:0005626 (insoluble fraction),GO:0005634 (nucleus),GO:0005654 (nucleoplasm),GO:0005657 (replication fork),GO:0005730 (nucleolus),GO:0005737 (cytoplasm),GO:0005739 (mitochondrion),GO:0005829 (cytosol),GO:0016363 (nuclear matrix)	GO:0000739 (DNA strand annealing activity),GO:0003677 (DNA binding),GO:0003700 (transcription factor activity),GO:0004518 (nuclease activity),GO:0005507 (copper ion binding),GO:0005515 (protein binding),GO:0005524 (ATP binding),GO:0008270 (zinc ion binding),GO:0019899 (enzyme binding),GO:0046872 (metal ion binding),GO:0046982 (protein heterodimerization activity),GO:0047485 (protein N-terminus bi…	7.6485	7.32345	7.24833	7.01084	8.04233	8.09919	7.81007	6.18023	5.89439	7.13242	7.62593	7.10515	7.24852	7.43639	7.74464	8.01385	7.64195	7.62239	7.06352	6.70649	6.11548	7.28044	7.4025	6.50225	6.34172	7.80847	8.14495	8.12805	8.01785	8.30815	8.284	8.4595	7.68349	7.62495	7.49996	8.04512	7.088	7.10207	6.679	7.01469	6.75317	7.7352	7.73224
Usf2	22282	1460228_at	upstream transcription factor 2	GO:0006350 (transcription),GO:0006355 (regulation of transcription, DNA-dependent),GO:0006357 (regulation of transcription from RNA polymerase II promoter),GO:0006879 (iron ion homeostasis),GO:0007595 (lactation),GO:0042742 (defense response to bacterium),GO:0045449 (regulation of transcription),GO:0045941 (positive regulation of transcription),GO:0050832 (defense response to fungus)	GO:0005576 (extracellular region),GO:0005634 (nucleus)	GO:0003677 (DNA binding),GO:0003700 (transcription factor activity),GO:0003702 (RNA polymerase II transcription factor activity),GO:0005179 (hormone activity),GO:0016563 (transcriptional activator activity),GO:0030528 (transcription regulator activity)	8.07292	7.9012	7.60169	8.26115	7.96676	7.70584	7.28214	6.46147	6.76256	8.26881	7.91748	8.03992	8.22622	8.09217	7.46758	8.08715	7.57311	7.49905	6.9922	6.82742	6.78222	7.46288	7.08326	6.92503	7.10827	7.76419	7.95359	7.96842	7.60299	7.87403	7.87363	7.87835	7.83525	7.80947	7.57564	7.88453	7.78466	7.36895	7.79306	7.62637	7.72101	8.34506	8.34911
Zfp161	22666	1420865_at	zinc finger protein 161	GO:0000122 (negative regulation of transcription from RNA polymerase II promoter),GO:0006350 (transcription),GO:0006355 (regulation of transcription, DNA-dependent)	GO:0005622 (intracellular),GO:0005634 (nucleus)	GO:0003676 (nucleic acid binding),GO:0003677 (DNA binding),GO:0005515 (protein binding),GO:0008270 (zinc ion binding),GO:0046872 (metal ion binding)	7.04063	6.71369	6.7042	7.14949	6.78043	6.21551	5.51522	5.13316	5.30966	6.72958	6.89297	6.70637	7.15674	6.50818	6.00074	7.81167	6.68145	6.08558	5.20777	5.5019	5.51666	6.54802	5.86268	6.12055	6.49481	7.28242	7.50527	7.31623	6.36642	7.61709	7.18291	7.54071	7.48099	7.16504	6.17184	7.22732	6.56994	6.99649	7.14861	6.63734	7.77438	7.32395	7.52178
[truncated: 53 more columns]
